# Supplementary material for: Alcohol-related harm to others in England: a cross-sectional analysis of national survey data
Source: PubMed Central journal article supplement — BMJ Open. 2019 May 9;9(5):e021046. doi: 10.1136/bmjopen-2017-021046 (PMC6528046; doi:10.1136/bmjopen-2017-021046), 2019-05-09
Supplement: bmjopen-2017-021046.draft_revisions.pdf [file bmjopen-2017-021046.draft_revisions.pdf]

# BMJ Open

BMJ Open is committed to open peer review. As part of this commitment we make the peer review history of every article we publish publicly available.

When an article is published we post the peer reviewers' comments and the authors' responses online. We also post the versions of the paper that were used during peer review. These are the versions that the peer review comments apply to.

The versions of the paper that follow are the versions that were submitted during the peer review process. They are not the versions of record or the final published versions. They should not be cited or distributed as the published version of this manuscript.

BMJ Open is an open access journal and the full, final, typeset and author-corrected version of record of the manuscript is available on our site with no access controls, subscription charges or pay-per-view fees (<http://bmjopen.bmj.com>).

If you have any questions on BMJ Open's open peer review process please email [info.bmjopen@bmj.com](mailto:info.bmjopen@bmj.com)

# BMJ Open

## Alcohol-related harm to others in England: a cross-sectional analysis of National survey data

|                               |                                                                                                                                                                                                                                                                                                                                                                                                                                                                                                                                                                                                                               |
|-------------------------------|-------------------------------------------------------------------------------------------------------------------------------------------------------------------------------------------------------------------------------------------------------------------------------------------------------------------------------------------------------------------------------------------------------------------------------------------------------------------------------------------------------------------------------------------------------------------------------------------------------------------------------|
| Journal:                      | <i>BMJ Open</i>                                                                                                                                                                                                                                                                                                                                                                                                                                                                                                                                                                                                               |
| Manuscript ID                 | bmjopen-2017-021046                                                                                                                                                                                                                                                                                                                                                                                                                                                                                                                                                                                                           |
| Article Type:                 | Research                                                                                                                                                                                                                                                                                                                                                                                                                                                                                                                                                                                                                      |
| Date Submitted by the Author: | 07-Dec-2017                                                                                                                                                                                                                                                                                                                                                                                                                                                                                                                                                                                                                   |
| Complete List of Authors:     | Beynon, Caryl; Public Health England, Risk Factors Intelligence Team, Health Improvement Directorate<br>Bayliss, David; Public Health England, Risk Factors Intelligence Team, Health Improvement Directorate<br>Mason, Jenny; Public Health England, Risk Factors Intelligence Team, Health Improvement Directorate<br>Sweeney, Kate; Public Health England, Risk Factors Intelligence, Health Improvement Directorate<br>Perkins, Clare; Public Health England, Risk Factors Intelligence, Health Improvement Directorate<br>Henn, Clive; Public Health England, Drugs and Tobacco Division, Health Improvement Directorate |
| Keywords:                     | alcohol-related harm to others, alcohol, violence                                                                                                                                                                                                                                                                                                                                                                                                                                                                                                                                                                             |
|                               |                                                                                                                                                                                                                                                                                                                                                                                                                                                                                                                                                                                                                               |

SCHOLARONE™  
Manuscripts

1 Alcohol-related harm to others in England: a cross-sectional analysis of National survey data

2  
3 Beynon C, Bayliss D, Mason J, Sweeney K, Perkins, C, Henn C

4  
5  
6 Corresponding author: Caryl Beynon

7  
8 Address: Risk Factor Intelligence Team, Health Improvement Directorate, Public Health England,  
9 Suite 3b, Cunard Building, Water Street, Liverpool, L3 1DS, United Kingdom

10 Email: [caryl.beynon@phe.gov.uk](mailto:caryl.beynon@phe.gov.uk)

11 Telephone: 0151 706 6205

12  
13  
14 Co-Authors:

15  
16 David Bayliss, Risk Factors Intelligence Team, Public Health England, Manchester, United  
17 Kingdom.

18  
19 Jenny Mason, Risk Factors Intelligence Team, Public Health England, Liverpool, United Kingdom.

20  
21 Kate Sweeney, Risk Factors Intelligence Team, Public Health England, Liverpool, United  
22 Kingdom.

23  
24 Clare Perkins, Risk Factors Intelligence Team, Public Health England, Liverpool, United Kingdom.

25  
26 Clive Henn, Alcohol, Drugs and Tobacco Division, Public Health England, London, United  
27 Kingdom.

## ABSTRACT

Objectives: to estimate the prevalence, the frequency and the perpetrators of alcohol-related harm to others and identify factors which predict experiencing harm and aggressive harm.

Design: Cross-sectional survey.

Setting: England.

Participants: Adults (general population) aged 16 and over.

Outcome measures: Percentage of respondents who experienced harm. The socio-economic and demographic factors (exposures) associated with the outcome (harm/no harm and aggressive harm/no aggressive harm) were identified.

Results: The weighted sample was 4,874; 20.1% (95% confidence interval [CI] 18.9-21.4) reported experiencing harm in the previous 12 months and 4.6% (95% CI 4.0-5.4) reported experiencing an aggressive harm. Friends and strangers were the dominant perpetrators of harm. Most harms occurred less than monthly but 5.2% of respondents experienced harm daily/almost daily. Factors associated with experiencing harm were: younger age, drinking harmfully/hazardously, White British, having a disability, being educated and living in private rented accommodation (compared to being an owner occupier). Being in the family stage of life was protective (compared to being single), as was being retired (compared to being employed). Factors associated with experiencing an aggressive harm were similar.

Conclusions: This exploratory study shows that alcohol-related harm to others affects a sizable proportion of the population of England. Even apparently insignificant harms, like being kept awake, can have a negative impact on health, while more serious harms are clearly of concern. That 5% of respondents experience harm daily/almost daily suggests a population of people with a particularly high burden likely to affect health. While the study identified factors associated with experiencing harm, methodological differences in the way harm is measured makes comparison with the literature difficult; using a standard methodology to measure harm across studies would be highly advantageous. Policies that focus on alcohol must take into consideration the impact of drinking on those other than the drinker.

Key words: alcohol-related harm to others, alcohol, violence

Word count: 4699

## STRENGTHS AND LIMITATIONS OF THE STUDY

- This is the largest survey on alcohol-related harm to others in the United Kingdom and the first national survey in England.
- The sampling approach and weighting ensured the data were representative of the population of England.
- There is potential selection bias which is inherent in all national surveys.
- The use of a bespoke survey made comparison of the findings with the literature difficult but when the study was initiated no universally accepted survey was identified.

## INTRODUCTION

The detrimental effect of alcohol is well documented; in 2012 alcohol consumption was responsible for approximately 6% of deaths and 5% of disease burden globally.<sup>1</sup> The focus has been on the harmful effects of alcohol on the drinker with less attention on the harms caused to others, including families, work colleagues and wider society. The World Health Organization's (WHO) global alcohol strategy highlights the need to consider the harm alcohol causes to people other than the drinker,<sup>2</sup> and it is these alcohol harms to others (AHTO) that are the focus of this study.

Health and social data provide insight into the potential harms caused by another's drinking. Data from the Crime Survey for England and Wales, for example, show that in just over half of all violent crimes the victim perceived the offender to be under the influence of alcohol and that alcohol use is particularly implicated in violent incidents between strangers.<sup>3</sup> Data from the Department of Transport show that during 2013 to 2015, there were almost 10,000 alcohol-related road traffic accidents in England which at least one driver failed the alcohol breathalyser test (data are available at: <https://fingertips.phe.org.uk/profile/local-alcohol-profiles>), demonstrating a considerable potential harm to both the drinking driver and to others on the roads.

In the last decade or so a number of studies have aimed to quantify and explore in more detail AHTO. These studies have provided widely varying estimates of the prevalence of harm, largely due to differences in the way harms are defined and the reference population. Studies which focus on identifying the socio-demographic and behavioural factors associated with being the victim of harm do not always provide consistent findings, suggesting the need for further research. While there is a relatively consistent finding across studies that younger age increases the likelihood of experiencing harm<sup>4-6</sup>, the association of harm with other characteristics is less clear. For example, generally women have been identified as more at risk of harm from another's drinking than men but this is not consistent across all countries and some authors report this association for certain types of harm only.<sup>4-7</sup>

When the impact of alcohol includes the effects to both the individual drinker and wider society, the cost is considerable. A review of studies in high-income countries show the gross economic costs of alcohol to range from 1.4% to 2.7% of gross domestic product; in the UK this would be equivalent to between £27 billion and £52 billion in 2016.<sup>8</sup> There is a need to better understand AHTO and the characteristics of those affected in order to implement an effective response. To date there has been no national survey of AHTO in England. The objectives of this exploratory study were to estimate the prevalence of AHTO in England, identify factors associated with being the victim of harm, the frequency with which this harm occurs and the perpetrators of harm.

## METHOD

### The survey

The questions to identify experience of AHTO were devised after an evidence review and were appended to the Alcohol Toolkit Survey (ATS) between 1<sup>st</sup> November 2015 and 31<sup>st</sup> March 2016. The ATS is a cross-sectional household survey, run by University College London and administered by Ipsos Mori using computer-assisted interviews. Each month a new sample of adults aged 16 and over who live in England complete the survey. Households are selected using a type of random location sampling which is a hybrid of random probability sampling and simple quota sampling. Interviews are conducted with one member of the selected household.<sup>9</sup> The AHTO questions were self-completed on guidance from the Research Support and Governance Office, Public Health England. Due to the novel and exploratory nature of the work, no formal

sample size calculation was undertaken as the parameters on which to base this were unavailable. Instead, a three month window of data collection was chosen, knowing that the ATS aimed to survey approximately 1,800 adults per month.<sup>9</sup>

The AHTO questions asked whether or not the respondent had experienced the following harms from another's drinking in the past 12 months:

1. Had a serious argument that did not include physical violence.
2. Felt physically threatened.
3. Been emotionally hurt or neglected.
4. Been physically hurt due to them assaulting me or acting violently.
5. Been physically hurt due to them accidentally injuring me (e.g. by falling on me).
6. Been put at risk in a car when someone was driving after drinking.
7. Felt forced or pressured into sex or something sexual.
8. Felt uncomfortable or anxious at a social occasion (e.g. a party).
9. Had someone break or damage something that mattered to me.
10. Had money that would have improved the quality of my life spent on their alcohol-related purchases.
11. Felt genuinely concerned that they may cause harm to my children or someone else's children.
12. Had to spend my personal time caring for a person with a long term health condition or disability that resulted from their current or previous drinking.
13. Been let down by someone due to them failing to do something that I was counting on them to do because of their drinking.
14. Been kept awake due to noise or disruption.
15. Drank alcohol myself in order to cope with the problems caused by their drinking.
16. Had to stop seeing or being in contact with someone because of their drinking.
17. Had to move out of my usual place of residence and stay somewhere else.
18. Had contact with the police.

If a respondent indicated that they had experienced any of the harms they were asked to indicate who perpetrated the harm and the frequency with which the harm occurred. Response options for who perpetrated the harm were: someone you were in a relationship with (e.g. wife/husband, partner) who you lived with; someone you were in a relationship with (e.g. wife/husband, partner) who you did not live with; another family member you lived with; a family member you did not live with; someone else you lived with; a friend; a work colleague; someone else you know; a stranger; refused/prefer not to say and don't know. Response options for the frequency of harm were: daily or almost daily (i.e. 4-7 days per week); weekly (i.e. 1-3 times per week); monthly (i.e. 2-3 times per month); less than once a month; refused/prefer not to say and don't know.

A range of demographic and socio-economic variables, collected as part of the ATS, were used as independent variables: sex (female, male); age band in years (16-24, 25-44, 45-64, 65 and over); broad ethnic group (White British, Other White, Black, Asian, Other); life stage (single, pre-family, family, post-family); marital status (single, married, widowed/divorced/separated); educational attainment (no qualifications, GSCE/O-level/CSE, A-level/vocational, degree/higher degree, other/still studying); social grade (AB [higher managerial, administrative and professional], C1 [supervisory, clerical and junior managerial, administrative and professional], C2 [skilled manual workers], D [semi-skilled and unskilled manual workers], E [state pensioners, casual and lowest grade workers, unemployed with state benefits only]); tenure of home (owned outright, bought on a mortgage, rented from local authority, rented from private landlord, other); self-defined disability (yes, no) and employment status (employed, unemployed, economically inactive, retired). The respondents' alcohol consumption was measured using the Alcohol Use Disorders Identification Test (AUDIT) which can be used to identify hazardous and harmful drinkers. Here

1 hazardous/harmful drinkers were identified as those with scores of eight or more if aged 65 or  
2 under, and scores of seven or more if aged over 65, in line with WHO guidance.<sup>10</sup>  
3

#### 4 **Analysis**

5 Respondents who refused to complete the AHTO questions (N=96) and those who chose the  
6 'don't know' or 'refused/prefer not to say' responses for all 18 harm questions (N=91) were  
7 excluded from all analyses. Individuals who failed to provide a valid response to other questions  
8 were excluded from the analysis of that particular variable.  
9

10 Two binary dependent variables were created. 'Any harm' was coded as yes if a person had  
11 experienced any of the 18 harm types in the previous 12 months. 'Aggressive harm' was coded as  
12 yes if the person had experienced one or more of the following three harms: felt physically  
13 threatened, been physically hurt due to them assaulting me or acting violently and felt forced or  
14 pressured into sex or something sexual.  
15

16  
17 All analyses were undertaken using Stata 13 and the 'svy' command prefix for analysing  
18 survey data. Prevalence was estimated by dividing the positive responses by the total  
19 responses for each harm type, any harm and aggressive harm; 95% confidence intervals  
20 (CI) were calculated for each prevalence estimate using the standard settings of Stata's  
21 'svy: tabulate' command.<sup>11</sup> Bivariate independence was tested using a 'corrected' Pearson  
22 chi-squared statistic for survey data [design-based *F* tests based on Rao and Scott  
23 correction<sup>12</sup>]. Multivariate analyses (binary logistic regression) were conducted to model  
24 the joint effects of the independent variables associated with any harm and aggressive  
25 harm in the bivariate analyses with 'no harm' and 'no aggressive harm' as the reference  
26 categories. Adjusted odds ratios (AOR) are given in comparison to the reference category  
27 for the given variable and *t* tests provide an indication of statistical significance. Where  
28 comparisons are presented between categories of a variable where neither is the  
29 reference category, an indication of statistical significance is given using adjusted Wald  
30 tests. Analyses were weighted (using weights generated by the ATS) in order to improve  
31 the representativeness of the sample relative to an English population profile using multiple  
32 socio-demographic variables.<sup>9</sup>  
33  
34

#### 35 **Ethics and funding**

36 Approval for the ATS was granted by University College London's ethics committee (reference:  
37 0498/001) and for the AHTO questions by the Research Support and Governance Office, Public  
38 Health England (reference: R&D 055). This work was funded by Public Health England.  
39  
40

## 41 **RESULTS**

42  
43  
44 The sample consisted of 4,881 people who had provided a valid response to AHTO questions  
45 (4,874 weighted sample size). Table 1 reports the estimated prevalence of each type of harm;  
46 20.1% (95% CI 18.9%-21.4%) of people reported experiencing at least one harm due to someone  
47 else's drinking in the past 12 months. Aggressive harms were experienced by 4.6% (95% CI 4.0%-  
48 5.4%) of respondents.  
49  
50  
51  
52  
53  
54  
55  
56  
57  
58  
59  
60

Table 1: Prevalence of harm in the previous 12 months, weighted data

| Harm type                                                                                                                                               | Number of respondents who experienced harm | Percentage of respondents who experienced harm | 95% CI      |
|---------------------------------------------------------------------------------------------------------------------------------------------------------|--------------------------------------------|------------------------------------------------|-------------|
| Been kept awake due to noise or disruption                                                                                                              | 390                                        | 8.0                                            | 7.2 - 8.9   |
| Felt uncomfortable or anxious at a social occasion (e.g. a party)                                                                                       | 331                                        | 6.8                                            | 6.0 - 7.6   |
| Had a serious argument that did NOT include physical violence                                                                                           | 275                                        | 5.7                                            | 5.0 - 6.4   |
| Been let down by someone due to them failing to do something that I was counting on them to do because of their drinking                                | 174                                        | 3.6                                            | 3.0 - 4.2   |
| Been emotionally hurt or neglected                                                                                                                      | 170                                        | 3.5                                            | 3.0 - 4.1   |
| Felt physically threatened                                                                                                                              | 164                                        | 3.4                                            | 2.8 - 4.0   |
| Had to stop seeing or being in contact with someone because of their drinking                                                                           | 120                                        | 2.5                                            | 2.0 - 3.0   |
| Had to contact the police                                                                                                                               | 117                                        | 2.4                                            | 2.0 - 2.9   |
| Had someone break or damage something that mattered to me                                                                                               | 95                                         | 1.9                                            | 1.5 - 2.5   |
| Been physically hurt due to them assaulting me or acting violently                                                                                      | 92                                         | 1.9                                            | 1.5 - 2.4   |
| Been put at risk in a car when someone was driving after drinking                                                                                       | 75                                         | 1.5                                            | 1.2 - 2.0   |
| Felt genuinely concerned that they may cause harm to my children or someone else's children                                                             | 61                                         | 1.2                                            | 0.9 - 1.6   |
| Had to spend my personal time caring for a person with a long term health condition or disability that resulted from their current or previous drinking | 57                                         | 1.2                                            | 0.9 - 1.5   |
| Been physically hurt due to them accidentally injuring me (e.g. by falling on me)                                                                       | 53                                         | 1.1                                            | 0.8 - 1.5   |
| Had money that would have improved the quality of my life spent on their alcohol-related purchases                                                      | 50                                         | 1.0                                            | 0.8 - 1.4   |
| Drank alcohol myself in order to cope with the problems caused by their drinking                                                                        | 33                                         | 0.7                                            | 0.5 - 1.0   |
| Felt forced or pressured into sex or something sexual                                                                                                   | 33                                         | 0.7                                            | 0.5 - 1.0   |
| Had to move out of my usual place of residence and stay somewhere else                                                                                  | 25                                         | 0.5                                            | 0.3 - 0.8   |
| At least one reported harm                                                                                                                              | 980                                        | 20.1                                           | 18.9 - 21.4 |
| At least one aggressive harm                                                                                                                            | 225                                        | 4.6                                            | 4.0 - 5.4   |

Bivariate predictors of experiencing any harm are reported in Table 2. Experience of harm decreased with age. This trend by age was reflected in experience of harm by life stage, with 36.5% (95% CI 32.8%-40.5%) of single people experiencing harm compared to 15.0% (95% CI 13.4%-16.7%) of those in a 'post-family' life stage. White British people were more likely to report experiencing harm (21.8%, 95% CI 20.3%-23.4%) than people of other broad ethnic groups; people of Asian ethnicity had the lowest prevalence (10.9%, 95% CI 8.2%-14.2%). People with no qualifications were least likely to report experiencing harm (9.9%, 95% CI 7.9%-12.5%). Those whose highest attainment was A-level or vocational had the highest prevalence (26.7%, 95% CI 24.1%-29.3%). People in the private-rented sector had the highest harm prevalence by tenure (29.9%, 95% CI 26.9%-33.1%). This compares to just 14.0% (95% CI 12.3%-16.0%) of people who owned their home outright experiencing harm. People who considered themselves disabled were more likely to report having experienced harm than those who did not (24.0%, 95% CI 20.3%-28.1%, compared to 19.7%, 95% CI 18.4%-21.1%). Those who were unemployed (26.8%, 95% CI 21.0%-33.6%) or economically inactive (26.8%, 95% CI 24.0%-29.9%) were more likely to report harm than those employed (22.0%, 95% CI 20.2%-24.0%); the difference between the unemployed and employed was not significant. Retired people were much less likely to report experiencing at least one harm (9.1%, 95% CI 7.5%-10.9%) than all other employment statuses. The prevalence of AHTO was significantly higher among



1 hazardous/harmful drinkers (37.9%, 95% CI 33.9%-42.1%) compared to those who were  
2 not (17.3%, 95% CI 16.0%-18.6%).  
3

4  
5 In the multivariate model, young age remained a strong risk factor for experiencing harm  
6 due to someone else's drinking, with those aged 16-24 significantly more likely to report  
7 experiencing harm than all older age groups (Table 2). Being a hazardous/harmful drinker  
8 was a strong risk factor, with odds of experiencing harm around double the odds of those  
9 who were not hazardous/harmful drinkers. Being White British compared to being in an  
10 Other White, Black or Asian ethnic group was also associated with increased risk of  
11 experiencing harm, as was considering oneself disabled, being educated, and living in  
12 private rented accommodation relative to being an owner occupier. Being in the family  
13 stage of life reduced the odds of experiencing harm compared to those that were single.  
14 Being retired, remained a significantly protective factor compared to those who were  
15 employed.  
16  
17  
18  
19  
20  
21  
22  
23  
24  
25  
26  
27  
28  
29  
30  
31  
32  
33  
34  
35  
36  
37  
38  
39  
40  
41  
42  
43  
44  
45  
46  
47  
48  
49  
50  
51  
52  
53  
54  
55  
56  
57  
58  
59  
60

Table 2: Bivariate and multivariate comparisons of harm versus no harm from another's drinking in past 12 months, weighted data

| Explanatory variable                  | Bivariate comparisons |      |             |      |      |             | Multivariate comparisons   |    |             |
|---------------------------------------|-----------------------|------|-------------|------|------|-------------|----------------------------|----|-------------|
|                                       | No harm               |      |             | Harm |      |             | Adjusted odds ratio        |    | 95% CI      |
|                                       | N                     | %    | 95% CI      | N    | %    | 95% CI      |                            |    |             |
| <b>Sex</b>                            |                       |      |             |      |      |             |                            |    |             |
| Female                                | 2,008                 | 80.1 | 78.3 - 81.8 | 498  | 19.9 | 18.2 - 21.7 | Not entered into the model |    |             |
| Male                                  | 1,887                 | 79.7 | 77.7 - 81.4 | 482  | 20.3 | 18.6 - 22.3 |                            |    |             |
| <b>Age band<sup>†</sup></b>           |                       |      |             |      |      |             |                            |    |             |
| 16-24                                 | 446                   | 63.4 | 59.6 - 67.0 | 258  | 36.6 | 33.0 - 40.4 | Reference                  |    |             |
| 25-44                                 | 1,278                 | 78.4 | 76.0 - 80.7 | 352  | 21.6 | 19.3 - 24.0 | 0.63                       | ** | 0.49 - 0.83 |
| 45-64                                 | 1,237                 | 81.5 | 79.1 - 83.7 | 281  | 18.5 | 16.3 - 20.9 | 0.50                       | ** | 0.34 - 0.75 |
| 65+                                   | 933                   | 91.2 | 89.3 - 92.9 | 90   | 8.8  | 7.1 - 10.7  | 0.36                       | ** | 0.21 - 0.61 |
| <b>Broad ethnic group<sup>†</sup></b> |                       |      |             |      |      |             |                            |    |             |
| White British                         | 2,975                 | 78.2 | 76.7 - 79.7 | 830  | 21.8 | 20.3 - 23.4 | Reference                  |    |             |
| Other White groups                    | 334                   | 84.9 | 80.4 - 88.5 | 59   | 15.1 | 11.5 - 19.6 | 0.52                       | ** | 0.36 - 0.76 |
| Black groups                          | 151                   | 83.9 | 78.6 - 88.1 | 29   | 16.1 | 11.9 - 21.4 | 0.61                       | *  | 0.41 - 0.92 |
| Asian groups                          | 376                   | 89.1 | 85.8 - 91.8 | 46   | 10.9 | 8.2 - 14.2  | 0.39                       | ** | 0.28 - 0.56 |
| Other groups                          | 44                    | 82.2 | 68.7 - 90.7 | 9    | 17.8 | 9.3 - 31.3  | 0.60                       |    | 0.30 - 1.21 |
| <b>Life stage<sup>†</sup></b>         |                       |      |             |      |      |             |                            |    |             |
| Single                                | 436                   | 63.5 | 59.5 - 67.2 | 251  | 36.5 | 32.8 - 40.5 | Reference                  |    |             |
| Pre-family                            | 222                   | 72.2 | 65.6 - 77.9 | 86   | 27.8 | 22.1 - 34.4 | 0.91                       |    | 0.61 - 1.34 |
| Family                                | 1,285                 | 81.1 | 78.8 - 83.2 | 299  | 18.9 | 16.8 - 21.2 | 0.68                       | ** | 0.52 - 0.89 |
| Post family                           | 1,950                 | 85.0 | 83.3 - 86.6 | 344  | 15.0 | 13.4 - 16.7 | 0.85                       |    | 0.56 - 1.28 |
| <b>Education<sup>†</sup></b>          |                       |      |             |      |      |             |                            |    |             |
| No qualifications                     | 683                   | 90.1 | 87.5 - 92.2 | 75   | 9.9  | 7.8 - 12.5  | Reference                  |    |             |
| GCSE/O-level/CSE                      | 764                   | 79.3 | 76.2 - 82.1 | 199  | 20.7 | 17.9 - 23.8 | 1.74                       | ** | 1.25 - 2.44 |
| A-level/vocational                    | 974                   | 73.3 | 70.7 - 75.9 | 354  | 26.7 | 24.1 - 29.3 | 2.04                       | ** | 1.48 - 2.82 |
| Degree/higher degree                  | 1,156                 | 79.3 | 76.8 - 81.7 | 301  | 20.7 | 18.3 - 23.2 | 2.16                       | ** | 1.56 - 3.00 |
| Other/still studying                  | 294                   | 85.6 | 81.2 - 89.1 | 50   | 14.4 | 10.9 - 18.9 | 1.42                       |    | 0.92 - 2.18 |
| <b>Social grade<sup>‡</sup></b>       |                       |      |             |      |      |             |                            |    |             |
| AB                                    | 1,066                 | 80.8 | 78.0 - 83.3 | 254  | 19.2 | 16.7 - 22.0 | Not entered into the model |    |             |
| C1                                    | 1,023                 | 77.4 | 75.0 - 79.6 | 299  | 22.6 | 20.4 - 25.0 |                            |    |             |
| C2                                    | 878                   | 81.7 | 78.8 - 84.4 | 196  | 18.3 | 15.6 - 21.2 |                            |    |             |
| D                                     | 614                   | 82.5 | 79.1 - 85.4 | 131  | 17.5 | 14.6 - 20.9 |                            |    |             |
| E                                     | 313                   | 75.8 | 71.8 - 79.4 | 100  | 24.2 | 20.6 - 28.2 |                            |    |             |
| <b>Tenure<sup>†</sup></b>             |                       |      |             |      |      |             |                            |    |             |
| Owned outright                        | 1,451                 | 86.0 | 84.0 - 87.8 | 237  | 14.0 | 12.3 - 16.0 | Reference                  |    |             |
| Bought on a mortgage                  | 1,142                 | 79.2 | 76.4 - 81.6 | 301  | 20.9 | 18.4 - 23.6 | 0.97                       |    | 0.74 - 1.28 |
| Rented from local authority           | 341                   | 78.8 | 74.6 - 82.5 | 92   | 21.2 | 17.6 - 25.4 | 1.38                       |    | 0.99 - 1.94 |
| Rented from private landlord          | 678                   | 70.1 | 66.9 - 73.1 | 289  | 29.9 | 26.9 - 33.1 | 1.52                       | ** | 1.15 - 2.01 |
| Other                                 | 248                   | 81.1 | 76.7 - 84.8 | 58   | 19.0 | 15.2 - 23.4 | 1.11                       |    | 0.77 - 1.61 |
| <b>Disability<sup>†</sup></b>         |                       |      |             |      |      |             |                            |    |             |
| Considers self disabled               | 396                   | 76.0 | 71.9 - 79.7 | 125  | 24.0 | 20.3 - 28.1 | Reference                  |    |             |
| Not disabled                          | 3,422                 | 80.3 | 78.9 - 81.6 | 842  | 19.7 | 18.4 - 21.1 | 0.56                       | ** | 0.42 - 0.74 |
| <b>Employment status<sup>†</sup></b>  |                       |      |             |      |      |             |                            |    |             |
| Employed                              | 2,081                 | 78.0 | 76.0 - 79.8 | 588  | 22.0 | 20.2 - 24.0 | Reference                  |    |             |
| Unemployed                            | 157                   | 73.2 | 66.4 - 79.0 | 58   | 26.8 | 21.0 - 33.6 | 1.09                       |    | 0.75 - 1.58 |
| Economically inactive                 | 634                   | 73.2 | 70.1 - 76.1 | 232  | 26.8 | 24.0 - 29.9 | 1.01                       |    | 0.81 - 1.27 |
| Retired                               | 1,021                 | 90.9 | 89.1 - 92.5 | 102  | 9.1  | 7.5 - 10.9  | 0.54                       | ** | 0.38 - 0.78 |
| <b>AUDIT<sup>†</sup></b>              |                       |      |             |      |      |             |                            |    |             |
| Not hazardous/harmful drinking        | 3,463                 | 82.7 | 81.4 - 84.0 | 723  | 17.3 | 16.0 - 18.6 | Reference                  |    |             |
| Hazardous/harmful drinking            | 419                   | 62.1 | 57.9 - 66.1 | 256  | 37.9 | 33.9 - 42.1 | 2.06                       | ** | 1.66 - 2.56 |

\*p<0.05, \*\*p<0.01.

<sup>†</sup>test of bivariate independence indicates significant difference (p<0.05).

<sup>‡</sup>AB is higher managerial, administrative and professional and Intermediate managerial, administrative and professional; C1 is supervisory, clerical and junior managerial, administrative and professional; C2 is skilled manual workers; D is semi-skilled and unskilled manual workers; and E is state pensioners, casual and lowest grade workers, unemployed with state benefits only.

1 In bivariate analyses, men were marginally more likely to experience an aggressive harm  
2 than women (5.3% and 4.0% respectively,  $p=0.04$ , Table 3). The other characteristics  
3 associated with experiencing aggressive harms were similar to experiencing any harm,  
4 with a higher prevalence of aggressive harm associated with being younger, disabled,  
5 single, non-retired, White British, renting accommodation and being a hazardous/harmful  
6 drinker.  
7  
8

9  
10 Controlling for other variables in the model, sex and stage of life were not associated with  
11 experiencing an aggressive harm (Table 3). Age remained a predictor with those aged 45  
12 and over significantly less likely to experience an aggressive harm than those aged 16-24.  
13 Disability was also a strong risk factor for experience of aggressive harm; the odds of  
14 experiencing aggressive harm for non-disabled people was just over a third of the odds for  
15 disabled people (adjusted OR=0.37, 95% CI 0.24-0.59). Housing tenure was a relatively  
16 strong risk factor, with the odds of experiencing an aggressive harm for renters around  
17 double the odds of those who are home owners. This was also the case for  
18 hazardous/harmful drinkers, with an adjusted odds ratio of 2.35 (95% CI 1.63-3.40) relative  
19 to those who were not hazardous/harmful drinkers. Being White British compared to being  
20 in the other White, Black or Asian ethnic groups was also associated with increased risk of  
21 experiencing an aggressive harm. Differences in the risk of experiencing aggressive harm,  
22 between people with different educational attainment were minimal; the only significant  
23 difference being the greater risk for those with a degree/higher degree relative to those  
24 with no qualifications. Being retired remained protective of experiencing an aggressive  
25 harm compared to being employed (AOR 0.33, 95% CI 0.13-0.83).  
26  
27  
28  
29  
30  
31  
32  
33  
34  
35  
36  
37  
38  
39  
40  
41  
42  
43  
44  
45  
46  
47  
48  
49  
50  
51  
52  
53  
54  
55  
56  
57  
58  
59  
60

Table 3: Bivariate and multivariate comparisons of aggressive harm versus no aggressive harm from another's drinking in past 12 months, weighted data

| Explanatory variable                  | Bivariate comparisons |      |             |                 |      |            | Multivariate comparisons   |                |
|---------------------------------------|-----------------------|------|-------------|-----------------|------|------------|----------------------------|----------------|
|                                       | No aggressive harm    |      |             | Aggressive harm |      |            | Adjusted odds ratio        | 95% CI         |
|                                       | N                     | %    | 95% CI      | N               | %    | 95% CI     |                            |                |
| <b>Sex<sup>†</sup></b>                |                       |      |             |                 |      |            |                            |                |
| Male                                  | 2,242                 | 94.7 | 93.5 - 95.6 | 127             | 5.3  | 4.4 - 6.5  | Reference                  |                |
| Female                                | 2,407                 | 96.1 | 95.1 - 96.8 | 99              | 4.0  | 3.2 - 4.9  | 0.74                       | 0.53 - 1.04    |
| <b>Age band<sup>†</sup></b>           |                       |      |             |                 |      |            |                            |                |
| 16-24                                 | 646                   | 91.7 | 89.1 - 93.6 | 59              | 8.4  | 6.4 - 10.9 | Reference                  |                |
| 25-44                                 | 1,539                 | 94.4 | 92.9 - 95.6 | 91              | 5.6  | 4.4 - 7.1  | 0.84                       | 0.49 - 1.43    |
| 45-64                                 | 1,454                 | 95.8 | 94.4 - 96.9 | 64              | 4.2  | 3.1 - 5.6  | 0.43                       | * 0.20 - 0.89  |
| 65+                                   | 1,010                 | 98.8 | 98.0 - 99.3 | 12              | 1.2  | 0.7 - 2.0  | 0.29                       | * 0.09 - 0.97  |
| <b>Broad ethnic group<sup>†</sup></b> |                       |      |             |                 |      |            |                            |                |
| White British                         | 3,605                 | 94.8 | 93.8 - 95.5 | 200             | 5.3  | 4.5 - 6.2  | Reference                  |                |
| Other White groups                    | 384                   | 97.7 | 95.6 - 98.8 | 9               | 2.3  | 1.2 - 4.4  | 0.30                       | ** 0.14 - 0.64 |
| Black groups                          | 176                   | 97.6 | 95.1 - 98.8 | 4               | 2.4  | 1.2 - 4.9  | 0.37                       | * 0.16 - 0.86  |
| Asian groups                          | 411                   | 97.5 | 95.4 - 98.7 | 11              | 2.5  | 1.4 - 4.7  | 0.43                       | * 0.21 - 0.89  |
| Other groups                          | 52                    | 97.5 | 88.7 - 99.5 | 1               | 2.5  | 0.5 - 11.3 | 0.36                       | 0.07 - 1.83    |
| <b>Life stage<sup>†</sup></b>         |                       |      |             |                 |      |            |                            |                |
| Single                                | 629                   | 91.5 | 88.9 - 93.6 | 58              | 8.5  | 6.4 - 11.1 | Reference                  |                |
| Pre-family                            | 286                   | 92.9 | 88.2 - 95.9 | 22              | 7.1  | 4.2 - 11.8 | 1.23                       | 0.60 - 2.50    |
| Family                                | 1,519                 | 95.9 | 94.7 - 96.9 | 65              | 4.1  | 3.1 - 5.3  | 0.89                       | 0.52 - 1.55    |
| Post family                           | 2,213                 | 96.5 | 95.5 - 97.3 | 81              | 3.5  | 2.7 - 4.6  | 1.80                       | 0.90 - 3.60    |
| <b>Education<sup>†</sup></b>          |                       |      |             |                 |      |            |                            |                |
| No qualifications                     | 739                   | 97.5 | 96.0 - 98.4 | 19              | 2.6  | 1.6 - 4.0  | Reference                  |                |
| GCSE/O-level/CSE                      | 911                   | 94.6 | 92.6 - 96.1 | 52              | 5.4  | 3.9 - 7.4  | 1.75                       | 0.96 - 3.21    |
| A-level/vocational                    | 1,242                 | 93.6 | 91.9 - 94.9 | 86              | 6.5  | 5.1 - 8.1  | 1.69                       | 0.95 - 3.01    |
| Degree/higher degree                  | 1,396                 | 95.8 | 94.3 - 96.9 | 62              | 4.2  | 3.1 - 5.7  | 1.94                       | * 1.02 - 3.69  |
| Other/still studying                  | 337                   | 97.9 | 95.8 - 99.0 | 7               | 2.1  | 1.0 - 4.2  | 0.88                       | 0.36 - 2.16    |
| <b>Social grade<sup>‡</sup></b>       |                       |      |             |                 |      |            |                            |                |
| AB                                    | 1,265                 | 95.9 | 94.2 - 97.1 | 54              | 4.1  | 2.9 - 5.8  | Not entered into the model |                |
| C1                                    | 1,267                 | 95.8 | 94.6 - 96.8 | 55              | 4.2  | 3.2 - 5.4  |                            |                |
| C2                                    | 1,016                 | 94.6 | 92.5 - 96.0 | 59              | 5.5  | 4.0 - 7.5  |                            |                |
| D                                     | 718                   | 96.4 | 94.5 - 97.6 | 27              | 3.6  | 2.4 - 5.5  |                            |                |
| E                                     | 382                   | 92.6 | 89.8 - 94.7 | 30              | 7.4  | 5.3 - 10.2 |                            |                |
| <b>Tenure<sup>†</sup></b>             |                       |      |             |                 |      |            |                            |                |
| Owned outright                        | 1,648                 | 97.7 | 96.7 - 98.3 | 40              | 2.4  | 1.7 - 3.3  | Reference                  |                |
| Bought on a mortgage                  | 1,386                 | 96.0 | 94.5 - 97.2 | 57              | 4.0  | 2.8 - 5.5  | 1.03                       | 0.57 - 1.88    |
| Rented from local authority           | 405                   | 93.5 | 90.4 - 95.6 | 28              | 6.5  | 4.4 - 9.6  | 2.58                       | ** 1.31 - 5.09 |
| Rented from private landlord          | 885                   | 91.5 | 89.3 - 93.3 | 82              | 8.5  | 6.7 - 10.7 | 2.33                       | ** 1.34 - 4.05 |
| Other                                 | 287                   | 94.0 | 91.0 - 96.0 | 18              | 6.0  | 4.0 - 9.0  | 2.04                       | * 1.04 - 4.02  |
| <b>Disability<sup>†</sup></b>         |                       |      |             |                 |      |            |                            |                |
| Considers self disabled               | 477                   | 91.4 | 88.4 - 93.7 | 45              | 8.6  | 6.3 - 11.7 | Reference                  |                |
| Not disabled                          | 4,086                 | 95.8 | 95.1 - 96.5 | 178             | 4.2  | 3.5 - 4.9  | 0.37                       | ** 0.24 - 0.59 |
| <b>Employment status<sup>†</sup></b>  |                       |      |             |                 |      |            |                            |                |
| Employed                              | 2,535                 | 95.0 | 93.8 - 95.9 | 135             | 5.0  | 4.1 - 6.2  | Reference                  |                |
| Unemployed                            | 204                   | 95.0 | 91.3 - 97.2 | 11              | 5.0  | 2.8 - 8.7  | 0.62                       | 0.32 - 1.22    |
| Economically inactive                 | 799                   | 92.2 | 90.2 - 93.9 | 67              | 7.8  | 6.1 - 9.8  | 1.10                       | 0.73 - 1.66    |
| Retired                               | 1,110                 | 98.9 | 98.1 - 99.3 | 13              | 1.1  | 0.7 - 1.9  | 0.33                       | * 0.13 - 0.83  |
| <b>AUDIT<sup>†</sup></b>              |                       |      |             |                 |      |            |                            |                |
| Not hazardous/harmful drinking        | 4,038                 | 96.5 | 95.7 - 97.1 | 149             | 3.6  | 2.9 - 4.3  | Reference                  |                |
| Hazardous/harmful drinking            | 599                   | 88.7 | 85.6 - 91.2 | 76              | 11.3 | 8.8 - 14.4 | 2.35                       | ** 1.63 - 3.40 |

\*p<0.05, \*\*p<0.01.

<sup>†</sup>test of bivariate independence indicates significant difference (p<0.05).

<sup>‡</sup>AB is higher managerial, administrative and professional and Intermediate managerial, administrative and professional; C1 is supervisory, clerical and junior managerial, administrative and professional; C2 is skilled manual workers; D is semi-skilled and unskilled manual workers; and E is state pensioners, casual and lowest grade workers, unemployed with state benefits only.

1  
2 The most frequently reported perpetrators of harms were friends (23.4% of total perpetrator  
3 reports) and strangers (22.9%), while work colleagues were the least reported perpetrators  
4 (3.7%, Table 1). The perpetrator varied according to the type of harm (Supplementary  
5 Table 1). Focussing on the most common harms experienced, being kept awake due to  
6 noise or disruption was predominantly perpetrated by strangers (49.5%, 95% CI 43.8%-  
7 55.3%), while both strangers and friends were the most common cause of feeling  
8 uncomfortable or anxious at a social occasion (strangers 34.4%, 95% CI 28.5%-40.7%;  
9 friends 32.8%, 95% CI 27.2%-39.0%). Serious arguments that did not include physical  
10 violence were predominantly perpetrated by friends (35.7%, 95% CI 29.5%-42.6%) or  
11 someone the respondent was in a relationship with and lived with (23.1%, 95% CI 17.6%-  
12 29.6%). Likewise, being let down by someone or being emotionally hurt or neglected were  
13 harm types perpetrated by people close to respondents.  
14  
15  
16  
17

18 Strangers were most likely to be the perpetrators of two of the aggressive harms: 60.5%  
19 (95% CI 51.2%-69.1%) of respondents reporting feeling physically threatened by a  
20 stranger and 31.5% (95% CI 21.5%-43.6%) of respondents reporting being physically hurt  
21 by a stranger. While 19.0% (95% CI 6.5%-44.2%) of respondents reported being forced or  
22 pressured into sex or something sexual by a stranger, the most commonly reported  
23 perpetrator for this sexual aggressive harm was someone the respondent was in a  
24 relationship with and lived with (23.3%, 95% CI 9.8%-46.0%; rising to 39.9% when also  
25 including people in a relationship who lived elsewhere).  
26  
27  
28

29  
30 Insert Figure 1 here.  
31

32  
33 Figure 2 reports information on the frequency with which harms were experienced. The  
34 majority of reported harms were experienced less than once a month (74.8%); 12.8%  
35 experienced harm at least monthly but less than weekly, 7.2% experienced weekly but less  
36 than daily, and 5.2% experienced daily or almost daily.  
37  
38

39  
40 Insert Figure 2 here.  
41

42 The frequency of harm varied by harm type (Supplementary Table 2). The harm types that  
43 were reported to reoccur most often were those whose description implies that the harm  
44 occurs over a prolonged period of time with someone who the respondent was in regular  
45 contact with. For example, 'had to spend my personal time caring for a person with a long  
46 term health condition or disability that resulted from their current or previous drinking'  
47 (19.4% daily or almost daily, 95% CI 10.2%-33.8%) and 'had to stop seeing or being in  
48 contact with someone because of their drinking' (19.3% daily or almost daily, 95% CI  
49 11.9%-29.6%). It was less common for other harms to be experienced at a daily or almost  
50 daily frequency. Nevertheless, all harm types had at least one respondent reporting daily  
51 or almost daily frequency of harm.  
52  
53  
54  
55  
56  
57  
58  
59  
60

## DISCUSSION

In this exploratory study one in five respondents experienced AHTO in the previous 12 months. The most commonly reported AHTO were being kept awake due to noise or disruption and feeling uncomfortable or anxious at a social occasion, which have been identified as the most prevalent harms in other studies.<sup>4,5</sup> More concerning, 4.6% reported experiencing an aggressive harm. Experiencing AHTO was predicted by a number of demographic and socio-economic variables. Friends and strangers were the dominant perpetrators of AHTO. Most harms occurred less than monthly but some respondents experienced harm daily or almost daily.

The main strength of this study is its large sample size; this is the largest survey on AHTO to have been conducted in the United Kingdom and the first to provide data for England. The sampling and weighting strategy were employed to ensure the sample was representative of the English population and thus the generalisability of the findings. There are a number of limitations to note. Recall is always a problem with surveys and harms that occurred a year ago or had little impact on the respondent may be more difficult to recall. Attributing causality is not possible using a cross sectional design. There are also some social groups that are systematically missing from surveys such as homeless people, those in hospital or care homes and those who are incarcerated; populations whose alcohol use is likely different.<sup>13</sup> A response rate could not be calculated as Ipsos Mori did not collect the data needed to calculate this. Previous studies on alcohol harm to others have also largely relied on cross-sectional surveys and are affected by the same limitations.

Here the prevalence of harm was 20.1%. The closest comparison is from a cross-sectional survey conducted in Wales in 2015 which used identical AHTO questions and reported the prevalence of any harm to be 59.7%.<sup>14</sup> There is some evidence from routine data to support a lower prevalence of harm in England than Wales. For example, the percentage of violent incidents where the victim believed the offender(s) to be under the influence of alcohol tends to be higher in Wales than England<sup>15</sup> although not conclusively so. However, the magnitude of the difference in the reported prevalence of harm between England and Wales seems questionable, given the similarities between the two nations. This difference could be due, in part, to differences in methodology and caution needs to be applied in drawing direct comparisons. In England the harm questions were asked after the ATS questions; this may have affected how people perceived harm, and therefore how they responded to the harm questions. It is also possible that respondents were experiencing fatigue by the end of the survey and this may have affected how fully they reported their experiences of harm. The English survey was administered face-to-face while the survey in Wales was administered via the telephone using landline numbers. Using data from the USA, researchers comparing face-to-face and telephone interviews reported that telephone surveys may miss certain sections of the population if they solely rely on landlines, including those with lower incomes.<sup>16</sup> Other surveys of AHTO conducted in the United Kingdom have reported the prevalence of harm in adults to be 46.3%<sup>5</sup> and 51%<sup>17</sup> in Scotland and 79% in the North West of England,<sup>17</sup> however these studies used very different AHTO questions so the results are not comparable. Despite the difference in prevalence between the Welsh survey and that reported here, the relative prevalence of the types of harm were similar; being kept awake at night, feeling uncomfortable or anxious at a social occasion and having a serious argument were the most prevalent harms in both surveys.

Being a hazardous/harmful drinker increased the odds of experiencing AHTO. This is perhaps unsurprising given that drinking with other drinkers and in places where alcohol is consumed increases one's exposure to drinkers. However the association with drinking and experiencing alcohol-harm is not conclusive. A cross-sectional comparison of harm from 'heavy drinking' friends and family across five Nordic countries and Scotland reported that drinking frequency was not

1 significantly related to experiencing harm from others but binge drinking frequency was. A higher  
2 frequency of binge drinking increased the risk of experiencing AHTO in Sweden and Norway and  
3 there was some evidence for this relationship in Finland also, but not in the other countries.<sup>7</sup> A  
4 paper using the same Norwegian data showed that the association between experiencing harm  
5 and one's own drinking was not evident for all types of harm.<sup>6</sup> Another cross-sectional survey  
6 showed a dose response relationship between how much a person drinks and experiencing  
7 AHTO, with dependent drinkers having the greatest risk.<sup>4</sup>  
8

9  
10 Here, age was also predictive of experiencing any harm and aggressive harm. A number of  
11 studies from a range of countries have reported that being of younger age increases the risk of  
12 being harmed from another's drinking.<sup>4-7, 18</sup> However, 'younger age' in this context does not  
13 always mean 'young'; one study, for example, concluded that those aged 59 or less had a higher  
14 risk of being negatively affected by a known drinker than those aged 60 and over.<sup>7</sup> A global  
15 survey of 63,725 respondents aged 18-34 years reported that those aged 18-24 years were  
16 significantly more likely to experience an aggressive AHTO than those aged 30-34 or 25-29;<sup>4</sup>  
17 similar to results reported here.  
18

19  
20 The respondent's sex was not a significant risk factor for experiencing harm. The literature is  
21 mixed regarding sex as a risk factor. Women were reported to be significantly more likely to  
22 experience harm than men in Finland and Sweden but not in Denmark, Iceland, Norway or  
23 Scotland.<sup>5, 6</sup> Being a woman was found to be a significant risk factor for all harms and aggressive  
24 harms using data from the Global Drug Survey.<sup>4</sup> Women have also been identified as being at  
25 higher risk of harm in the USA.<sup>19</sup> The association of sex and experiencing harm is different for  
26 different types of harm. For example women are significantly more likely than men to experience  
27 unwanted sexual attention/sexual harassment or assault<sup>4, 6</sup> whereas men are more likely to have  
28 clothing, property or other belongings damaged.<sup>4, 6</sup>  
29

30  
31 Few studies have considered whether ethnic background is a risk factor for experiencing harm.  
32 Data from the USA demonstrate that the link between ethnicity and experience of harm is not  
33 conclusive.<sup>18, 19</sup> Here, being White British was significantly associated with experiencing harm and  
34 also aggressive harm. Most minority ethnic groups in United Kingdom have higher rates of  
35 abstinence from alcohol and lower levels of drinking than people of white ethnicity.<sup>20</sup> However the  
36 results of the multivariate modelling presented in this study show that White British ethnicity is  
37 predictive of experiencing harm and aggressive harm independently of AUDIT score.  
38

39  
40 Measures such as educational attainment, type of accommodation and employment status are  
41 proxy measures for socio-economic status. Here findings show that experiencing harm was  
42 significantly associated with having qualifications (compared to having none) with the highest risk  
43 being for those with a degree or higher degree. It is difficult to compare these results to the  
44 literature because of differences in the ways education is measured. Data from a Danish national  
45 survey showed no clear association between experiencing harm and education level with  
46 education categorised as low (completion up to year 11), middle (high school/technical college)  
47 and high (college or university).<sup>21</sup> Data from the Global Drug Survey showed no association  
48 between education and experience of harm or aggressive harm but there was an association  
49 between education and experiencing particular types of harm.<sup>4</sup>  
50

51  
52 The current study shows that being retired is protective of harm and aggressive harm compared to  
53 all other employment statuses. This association was independent of age. The risk of being harmed  
54 did not differ significantly between those who were employed and not employed. Data from two  
55 surveys conducted in the USA show that those who were unemployed were significantly more  
56 likely to experience AHTO than those who were employed.<sup>18, 19</sup> Data from Denmark show that  
57  
58  
59  
60

1 employment might be significantly associated with experiencing harm but no conclusive results  
2 were provided and the wide confidence intervals show that estimates lacked precision.<sup>21</sup>  
3

4 Here, compared to those that owned their home outright, those who rented from a private landlord  
5 were significantly more likely to experience harm and those who rented from the local authority or  
6 rented from a private landlord were significantly more likely to experience an aggressive harm.  
7 Having a disability was a significant predictor of experiencing any harm and an aggressive harm.  
8 No previous studies on the association between type of accommodation tenure or having a  
9 disability and experiencing harm were identified. Being in the family stage of life was also  
10 protective of experiencing harm compared to being single. This is perhaps surprising given that  
11 the survey included questions which specifically asked about harms most likely caused by a family  
12 member. Evidence on the effect of relationships and household types is mixed and largely  
13 dependent on the way these are categorised and so cannot be directly compared.  
14  
15

16 This study identified friends and strangers as the dominant perpetrators making up around 46% of  
17 all reports, though the perpetrator varied depending on type of harm. For example, family  
18 members made up a larger proportion of perpetrators of harms such as stopping seeing someone  
19 or having to care for someone because of their drinking. In terms of frequency of harm, while three  
20 quarters of harms were experienced less than monthly, 5.2% were experienced daily or almost  
21 daily indicating a considerable burden for of alcohol-related harm for a section of the population.  
22 The frequency of experiencing harm was largely dependent on the type of harm. Harms with the  
23 highest frequency of daily/almost daily reports were those which occurred over a prolonged period  
24 of time and/or implied frequent contact with the perpetrator such as caring for someone with a  
25 long-term health condition or disability that results from them drinking. Data from two surveys  
26 suggest that exposure to heavy drinkers is associated with poorer health, wellbeing and quality of  
27 life.<sup>22 23</sup>  
28  
29

30 To conclude, this is the largest ever survey of AHTO conducted within the United Kingdom and the  
31 first national study in England. It is clear that AHTO is relatively prevalent and that some  
32 individuals experience harm frequently. The most prevalence harms could be considered  
33 insignificant but even apparently minor harms such as sleep disruption can have an impact on  
34 health and quality of life,<sup>24</sup> particularly if experienced persistently. It is difficult to compare results  
35 with the literature because of the diversity of methods being employed. In order to support  
36 temporal and geographic comparisons it would be advantageous for studies to use a consistent  
37 methodology including the sampling and data collection methods, in addition to the harm  
38 questions. The WHO-ThaiHealth project has designed a survey to measure AHTO in order to  
39 facilitate international comparison.<sup>25 26</sup> While lengthy, the use of this would be a good way to  
40 develop a comprehensive and consistent evidence base. However it is clear that there are  
41 differences across harm types and more detailed analysis of specific harms would be valuable in  
42 terms of supporting remedial action from policymakers. Research on the types of alcohol  
43 consumption patterns that increase the likelihood of experiencing AHTO would be valuable.  
44 Understanding what puts younger adults at increased risk could be a useful focus for future  
45 research as it might identify the contextual factors which make experiencing harm more likely.  
46  
47  
48  
49  
50  
51  
52  
53  
54  
55  
56  
57  
58  
59  
60



## ACKNOWLEDGEMENTS

The authors would like to thank the alcohol expert forum of the five nations Public Health Peer Network for initiating this work and to PHE for funding it. Thanks also to the following people in PHE: Craig Timpson for quality assuring the analyses, Helen Outhwaite for help with searching for literature, Robyn Burton and Helen Willey for their input into early conversations about methods. Thanks to Dr Jamie Brown, University College London, for permitting the harm to others questions to be appended to the alcohol toolkit survey and for his subsequent support with interpretation of the alcohol toolkit survey questions. Finally, thanks to Ipsos MORI for delivering the survey, in particular Stuart Smedley.

## COMPETING INTERESTS

None declared.

## FUNDING

The work was funded by Public Health England.

## AUTHORS' CONTRIBUTIONS

CB provided day to day management of the study, helped design the questionnaire and wrote the first draft. DB did the analysis and helped to write the first draft. JM undertook a systematic review of the literature. KS was involved with the initiation, helped design the questionnaire and provided statistical support. CP was involved with the initiation of the study. CH was involved with the initiation of the study and helped design the questionnaire. All authors reviewed and helped to revise successive drafts and approved the final version of the manuscript.

1  
2  
3  
4  
5  
6  
7  
8  
9  
10  
11  
12  
13  
14  
15  
16  
17  
18  
19  
20  
21  
22  
23  
24  
25  
26  
27  
28  
29  
30  
31  
32  
33  
34  
35  
36  
37  
38  
39  
40  
41  
42  
43  
44  
45  
46  
47  
48  
49  
50  
51  
52  
53  
54  
55  
56  
57  
58  
59  
60  
**REFERENCES**

1. World Health Organization. Global status report on alcohol and health. Geneva: World Health Organization, 2014.
2. World Health Organization. Global strategy to reduce the harmful use of alcohol. Geneva: World Health Organization, 2010.
3. Office for National Statistics. Chapter 5: Violent crime and sexual offences - alcohol-related violence. London: Office for National Statistics, 2015.
4. Bellis M, Quigg Z, Hughes K, et al. Harm from other people's drinking: an international survey of their occurrence, impacts on feeling safe and legislation relating to their control. *BMJ Open* 2015;5
5. Moan I, Storvoll E, Sundin E, et al. Experienced harm from other people's drinking: a comparison of Northern European countries. *Substance Abuse Research and Treatment* 2015;9(S(2)):45-57.
6. Storvoll E, Moan I, Lund I. Negative consequences of other people's drinking: prevalence, perpetrators and locations. *Drug and Alcohol Review* 2016;2016
7. Ramstedt M, Sundin E, Moan I, et al. Harm experienced from the heavy drinking of family and friends in the general population: A comparative study of six northern European countries. *Substance Abuse Research and Treatment* 2015;9(S2)
8. Burton R, Henn C, Lavoie D, et al. A rapid evidence review of the effectiveness and cost-effectiveness of alcohol policies: an English perspective. *The Lancet* 2016 doi: [http://dx.doi.org/10.1016/S0140-6736\(16\)32420-5](http://dx.doi.org/10.1016/S0140-6736(16)32420-5)
9. Beard E, Brown J, West R, et al. Protocol for a national monthly survey of alcohol use in England with 6-month follow up: 'The Alcohol Toolkit Survey'. *BMC Public Health* 2015;15:230.
10. Barbor T, Higgins-Biddle J, Saunders J, et al. AUDIT: The alcohol use disorders identification test, guidelines for use in primary care. 2nd edition. Geneva: World Health Organization, 2001.
11. StataCorp. Stata survey data reference manual: release 13. Texas: StataCorp LP, 2013.
12. Rao J, Scott A. On chi-squared tests for multiway contingency tables with cell proportions estimated from survey data. *Annals of Statistics* 1981;12:46-60.
13. Johnson T. Sources of error in substance use prevalence surveys. *International Scholarly Research Notices* 2014;2014 doi: <http://dx.doi.org/10.1155/2014/923290>
14. Quigg Z, Bellis AM, Grey H, et al. Alcohol's harms to others: the harms from other people's alcohol consumption in Wales. Cardiff: Public Health Wales, 2016.
15. Office for National Statistics. Estimates of violent incidents where the victim believed the offender(s) to be under the influence of alcohol or drugs in England and Wales, year ending March 2006 to year ending March 2016 Crime Survey for England and Wales, 2017.
16. Greenfield T, Midanik L, Rogers J. Effects of telephone versus face-to-face interview models on reports of alcohol consumption. *Addiction* 2000;95(2):277-84.
17. Gell L, Ally A, Buykx P, et al. Alcohol's harm to others. Sheffield: The University of Sheffield, 2015.
18. Karriker-Jaffe K, Greenfield T. Gender differences in associations of neighbourhood disadvantage with alcohol's harms to others: a cross-sectional study from the United States. *Drug and Alcohol Review* 2014;33(3):296-303.
19. Greenfield T, Karriker-Jaffe K, Kaplan L, et al. Trends in alcohol's harms to others (AHTO) and co-occurrence of family-related AHTO: the four US National Alcohol Surveys, 2000-2015. *Substance Abuse Research and Treatment* 2015;2015(9(S2)):23-31.
20. Hurcombe R, Bayley M, Goodman A. Ethnicity and alcohol: a review of the UK literature. York: Joseph Rowntree Foundation, 2010.

- 1 21. Seid A, Grittner U, Greenfield T, et al. To cause harm and to be harmed by others: new  
2 perspectives on alcohol's harm to others. *Substance Abuse Research and Treatment*  
3 2015;2015(S2):13-22.
- 4 22. Casswell S, You R, Huckle T. Alcohol's harm to others: reduced wellbeing and health status  
5 for those with heavy drinkers in their lives. *Addiction* 2011;106(6):1087-94.
- 6 23. Jiang H, Callinan S, Laslett A, et al. Correlates of caring for the drinkers and others among  
7 those harmed by another's drinking. *Drug and Alcohol Review* 2015;34:162-69.
- 8 24. Muzet A. Environmental noise, sleep and health. *Sleep medicine reviews* 2007;12(2):135-42.
- 9 25. World Health Organization/ThaiHealth International Collaboration Research Project. The Harm  
10 to Others from Drinking. Geneva: World Health Organization, 2012.
- 11 26. Callinan S, Laslett A, Rekve D, et al. Alcohol's harm to others: An international collaborative  
12 project. *International Journal of Alcohol and Drug Research* 2016;5(2):25-32.
- 13
- 14
- 15
- 16
- 17
- 18
- 19
- 20
- 21
- 22
- 23
- 24
- 25
- 26
- 27
- 28
- 29
- 30
- 31
- 32
- 33
- 34
- 35
- 36
- 37
- 38
- 39
- 40
- 41
- 42
- 43
- 44
- 45
- 46
- 47
- 48
- 49
- 50
- 51
- 52
- 53
- 54
- 55
- 56
- 57
- 58
- 59
- 60

For peer review only

1  
2  
3 Figure Legends  
4

5 Figure 1: Perpetrators as a percentage of all reported harms to others  
6

7 Figure 2: Frequency of all reported harms to others  
8  
9  
10  
11  
12  
13  
14  
15  
16  
17  
18  
19  
20  
21  
22  
23  
24  
25  
26  
27  
28  
29  
30  
31  
32  
33  
34  
35  
36  
37  
38  
39  
40  
41  
42  
43  
44  
45  
46  
47  
48  
49  
50  
51  
52  
53  
54  
55  
56  
57  
58  
59  
60

For peer review only

1  
2  
3  
4  
5  
6  
7  
8  
9  
10  
11  
12  
13  
14  
15  
16  
17  
18  
19  
20  
21  
22  
23  
24  
25  
26  
27  
28  
29  
30  
31  
32  
33  
34  
35  
36  
37  
38  
39  
40  
41  
42  
43  
44  
45  
46  
47  
48  
49  
50  
51  
52  
53  
54  
55  
56  
57  
58  
59  
60

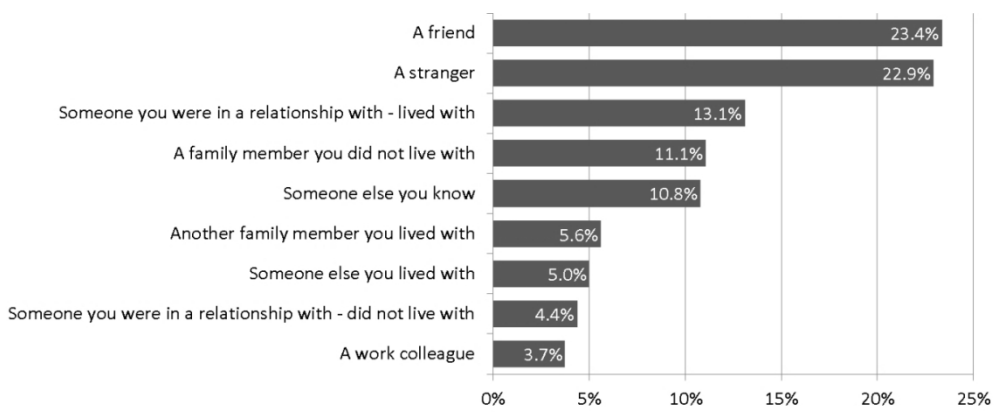

Figure 1: Perpetrators as a percentage of all reported harms to others

159x63mm (220 x 220 DPI)

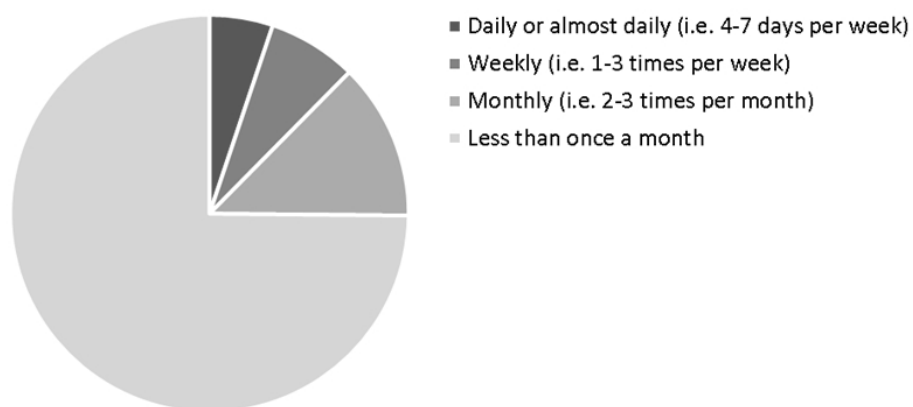

Figure 2: Frequency of all reported harms to others

144x64mm (150 x 150 DPI)

Supplementary Table 1: Perpetrator of harm by harm type (continued on the next page)

| Harm type                                                                                                                                               |     | Someone you were in a relationship with (e.g. wife/husband, partner) who you lived with |      |           | Someone you were in a relationship with (e.g. wife/husband, partner) who you did not live with |      |           | Another family member you lived with |      |           | A family member you did not live with |      |           |
|---------------------------------------------------------------------------------------------------------------------------------------------------------|-----|-----------------------------------------------------------------------------------------|------|-----------|------------------------------------------------------------------------------------------------|------|-----------|--------------------------------------|------|-----------|---------------------------------------|------|-----------|
|                                                                                                                                                         |     | n                                                                                       | %    | 95% CI    | n                                                                                              | %    | 95% CI    | n                                    | %    | 95% CI    | n                                     | %    | 95% CI    |
| Had a serious argument that did NOT include physical violence                                                                                           | No  | 199                                                                                     | 76.9 | 70.4-82.4 | 240                                                                                            | 92.7 | 89.0-95.2 | 240                                  | 92.7 | 88.6-95.3 | 216                                   | 83.5 | 77.7-88.0 |
|                                                                                                                                                         | Yes | 60                                                                                      | 23.1 | 17.6-29.6 | 19                                                                                             | 7.3  | 4.8-11.0  | 19                                   | 7.3  | 4.7-11.4  | 43                                    | 16.5 | 12.0-22.3 |
| Felt physically threatened                                                                                                                              | No  | 136                                                                                     | 88.5 | 82.2-92.8 | 149                                                                                            | 97.0 | 92.4-98.8 | 148                                  | 96.7 | 92.0-98.6 | 145                                   | 94.5 | 89.6-97.2 |
|                                                                                                                                                         | Yes | 18                                                                                      | 11.5 | 7.2-17.8  | 5                                                                                              | 3.0  | 1.2-7.6   | 5                                    | 3.3  | 1.4-8.0   | 8                                     | 5.5  | 2.8-10.5  |
| Been emotionally hurt or neglected                                                                                                                      | No  | 121                                                                                     | 76.1 | 67.7-82.9 | 137                                                                                            | 85.9 | 78.7-91.0 | 146                                  | 92.0 | 86.4-95.4 | 116                                   | 72.7 | 64.2-79.8 |
|                                                                                                                                                         | Yes | 38                                                                                      | 23.9 | 17.1-32.3 | 22                                                                                             | 14.1 | 9.1-21.3  | 13                                   | 8.0  | 4.6-13.6  | 43                                    | 27.3 | 20.2-35.8 |
| Been physically hurt due to them assaulting me or acting violently                                                                                      | No  | 66                                                                                      | 79.8 | 69.2-87.4 | 79                                                                                             | 95.0 | 86.3-98.3 | 76                                   | 90.8 | 80.5-95.9 | 73                                    | 88.1 | 76.8-94.3 |
|                                                                                                                                                         | Yes | 17                                                                                      | 20.2 | 12.6-30.8 | 4                                                                                              | 5.0  | 1.7-13.7  | 8                                    | 9.2  | 4.1-19.6  | 10                                    | 11.9 | 5.7-23.2  |
| Been physically hurt due to them accidentally injuring me (e.g. by falling on me)                                                                       | No  | 44                                                                                      | 87.2 | 74.1-94.2 | 47                                                                                             | 91.5 | 79.3-96.8 | 51                                   | 99.2 | 94.4-99.9 | 44                                    | 86.6 | 72.0-94.2 |
|                                                                                                                                                         | Yes | 7                                                                                       | 12.8 | 5.8-25.9  | 4                                                                                              | 8.5  | 3.2-20.7  | 0                                    | 0.8  | 0.1-5.6   | 7                                     | 13.4 | 5.8-28.0  |
| Been put at risk in a car when someone was driving after drinking                                                                                       | No  | 62                                                                                      | 89.5 | 78.5-95.2 | 65                                                                                             | 93.6 | 83.4-97.7 | 63                                   | 90.4 | 79.6-95.8 | 66                                    | 96.1 | 87.9-98.8 |
|                                                                                                                                                         | Yes | 7                                                                                       | 10.5 | 4.8-21.5  | 4                                                                                              | 6.4  | 2.3-16.6  | 7                                    | 9.6  | 4.2-20.4  | 3                                     | 4.0  | 1.2-12.1  |
| Felt forced or pressured into sex or something sexual                                                                                                   | No  | 21                                                                                      | 76.7 | 54.0-90.2 | 23                                                                                             | 83.4 | 61.0-94.2 | 26                                   | 95.4 | 70.5-99.4 | 26                                    | 95.8 | 72.8-99.5 |
|                                                                                                                                                         | Yes | 6                                                                                       | 23.3 | 9.8-46.0  | 5                                                                                              | 16.6 | 5.8-39.0  | 1                                    | 4.7  | 0.6-29.5  | 1                                     | 4.2  | 0.5-27.2  |
| Felt uncomfortable or anxious at a social occasion (e.g. a party)                                                                                       | No  | 280                                                                                     | 91.7 | 87.4-94.6 | 297                                                                                            | 97.3 | 94.5-98.7 | 299                                  | 97.8 | 95.2-99.0 | 271                                   | 88.9 | 84.3-92.3 |
|                                                                                                                                                         | Yes | 25                                                                                      | 8.3  | 5.4-12.6  | 8                                                                                              | 2.7  | 1.3-5.5   | 7                                    | 2.2  | 1.0-4.9   | 34                                    | 11.1 | 7.7-15.7  |
| Had someone break or damage something that mattered to me                                                                                               | No  | 75                                                                                      | 82.8 | 72.5-89.8 | 87                                                                                             | 96.0 | 88.6-98.6 | 80                                   | 88.2 | 78.4-93.9 | 82                                    | 90.8 | 82.1-95.5 |
|                                                                                                                                                         | Yes | 16                                                                                      | 17.2 | 10.2-27.5 | 4                                                                                              | 4.0  | 1.4-11.4  | 11                                   | 11.8 | 6.1-21.6  | 8                                     | 9.2  | 4.5-17.9  |
| Had money that would have improved the quality of my life spent on their alcohol-related purchases                                                      | No  | 30                                                                                      | 66.5 | 49.1-80.4 | 44                                                                                             | 95.9 | 83.2-99.1 | 40                                   | 87.5 | 73.4-94.6 | 40                                    | 89.1 | 72.6-96.2 |
|                                                                                                                                                         | Yes | 15                                                                                      | 33.5 | 19.6-50.9 | 2                                                                                              | 4.1  | 0.9-16.8  | 6                                    | 12.5 | 5.4-26.6  | 5                                     | 10.9 | 3.8-27.4  |
| Felt genuinely concerned that they may cause harm to my children or someone else's children                                                             | No  | 45                                                                                      | 87.4 | 75.3-94.0 | 49                                                                                             | 96.9 | 87.6-99.3 | 48                                   | 94.1 | 82.4-98.2 | 41                                    | 80.9 | 65.9-90.2 |
|                                                                                                                                                         | Yes | 6                                                                                       | 12.6 | 6.0-24.7  | 2                                                                                              | 3.1  | 0.7-12.4  | 3                                    | 5.9  | 1.8-17.6  | 10                                    | 19.2 | 9.8-34.1  |
| Had to spend my personal time caring for a person with a long term health condition or disability that resulted from their current or previous drinking | No  | 47                                                                                      | 87.5 | 73.5-94.6 | 52                                                                                             | 96.4 | 86.2-99.2 | 49                                   | 91.0 | 79.4-96.4 | 34                                    | 62.4 | 47.2-75.5 |
|                                                                                                                                                         | Yes | 7                                                                                       | 12.5 | 5.4-26.5  | 2                                                                                              | 3.6  | 0.8-13.8  | 5                                    | 9.0  | 3.6-20.6  | 20                                    | 37.6 | 24.5-52.8 |
| Been let down by someone due to them failing to do something that I was counting on them to do because of their drinking                                | No  | 136                                                                                     | 81.1 | 73.5-86.9 | 160                                                                                            | 95.2 | 90.7-97.6 | 156                                  | 92.8 | 87.8-95.8 | 137                                   | 81.4 | 74.1-87.0 |
|                                                                                                                                                         | Yes | 32                                                                                      | 18.9 | 13.1-26.5 | 8                                                                                              | 4.8  | 2.4-9.4   | 12                                   | 7.2  | 4.2-12.2  | 31                                    | 18.6 | 13.0-25.9 |
| Been kept awake due to noise or disruption                                                                                                              | No  | 346                                                                                     | 93.3 | 89.8-95.7 | 362                                                                                            | 97.7 | 95.2-98.9 | 348                                  | 94.1 | 90.8-96.3 | 359                                   | 97.0 | 94.5-98.4 |
|                                                                                                                                                         | Yes | 25                                                                                      | 6.7  | 4.3-10.2  | 8                                                                                              | 2.3  | 1.1-4.8   | 22                                   | 5.9  | 3.7-9.2   | 11                                    | 3.0  | 1.6-5.5   |
| Drank alcohol myself in order to cope with the problems caused by their drinking                                                                        | No  | 22                                                                                      | 76.9 | 53.4-90.6 | 25                                                                                             | 87.3 | 66.8-95.9 | 27                                   | 93.8 | 76.5-98.6 | 25                                    | 86.0 | 62.0-95.9 |
|                                                                                                                                                         | Yes | 7                                                                                       | 23.1 | 9.4-46.6  | 4                                                                                              | 12.7 | 4.1-33.2  | 2                                    | 6.2  | 1.4-23.5  | 4                                     | 14.0 | 4.1-38.0  |
| Had to stop seeing or being in contact with someone because of their drinking                                                                           | No  | 92                                                                                      | 80.6 | 71.2-87.4 | 107                                                                                            | 93.9 | 87.2-97.2 | 106                                  | 92.7 | 85.9-96.3 | 86                                    | 75.9 | 66.1-83.6 |
|                                                                                                                                                         | Yes | 22                                                                                      | 19.4 | 12.6-28.8 | 7                                                                                              | 6.1  | 2.8-12.8  | 8                                    | 7.3  | 3.7-14.1  | 27                                    | 24.1 | 16.4-33.9 |
| Had to move out of my usual place of residence and stay somewhere else                                                                                  | No  | 12                                                                                      | 55.3 | 31.0-77.3 | 21                                                                                             | 97.4 | 81.0-99.7 | 13                                   | 59.9 | 34.8-80.7 | 20                                    | 95.4 | 80.5-99.0 |
|                                                                                                                                                         | Yes | 10                                                                                      | 44.7 | 22.7-69.0 | 1                                                                                              | 2.6  | 0.3-19.0  | 9                                    | 40.1 | 19.3-65.2 | 1                                     | 4.6  | 1.0-19.5  |
| Had to contact the police                                                                                                                               | No  | 93                                                                                      | 87.0 | 79.0-92.2 | 105                                                                                            | 97.8 | 93.1-99.3 | 101                                  | 94.8 | 88.4-97.8 | 95                                    | 88.8 | 79.1-94.3 |
|                                                                                                                                                         | Yes | 14                                                                                      | 13.0 | 7.8-21.0  | 2                                                                                              | 2.2  | 0.7-6.9   | 6                                    | 5.2  | 2.2-11.6  | 12                                    | 11.2 | 5.7-20.9  |

Supplementary Table 1: Perpetrator of harm by harm type (continued from the previous page)

| Harm type                                                                                                                                               |     | Someone else you lived with |       |            | A friend |      |           | A work colleague |       |           | Someone else you know |      |           | A stranger |       |           |
|---------------------------------------------------------------------------------------------------------------------------------------------------------|-----|-----------------------------|-------|------------|----------|------|-----------|------------------|-------|-----------|-----------------------|------|-----------|------------|-------|-----------|
|                                                                                                                                                         |     | n                           | %     | 95% CI     | n        | %    | 95% CI    | n                | %     | 95% CI    | n                     | %    | 95% CI    | n          | %     | 95% CI    |
| Had a serious argument that did NOT include physical violence                                                                                           | No  | 244                         | 94.1  | 90.2-96.5  | 167      | 64.3 | 57.5-70.5 | 249              | 96.2  | 92.5-98.1 | 233                   | 90.0 | 85.0-93.4 | 225        | 86.8  | 81.4-90.8 |
|                                                                                                                                                         | Yes | 15                          | 5.9   | 3.5-9.9    | 93       | 35.7 | 29.5-42.6 | 10               | 3.8   | 1.9-7.5   | 26                    | 10.0 | 6.6-15.0  | 34         | 13.2  | 9.2-18.6  |
| Felt physically threatened                                                                                                                              | No  | 153                         | 99.6  | 97.4-100.0 | 130      | 84.6 | 77.0-90.0 | 151              | 98.2  | 93.0-99.6 | 132                   | 85.7 | 78.0-91.1 | 61         | 39.5  | 30.9-48.8 |
|                                                                                                                                                         | Yes | 1                           | 0.4   | 0.1-2.6    | 24       | 15.4 | 1.0-23.0  | 3                | 1.8   | 0.4-7.0   | 22                    | 14.3 | 8.9-22.0  | 93         | 60.5  | 51.2-69.1 |
| Been emotionally hurt or neglected                                                                                                                      | No  | 147                         | 92.5  | 85.9-96.1  | 115      | 72.5 | 64.0-79.6 | 154              | 97.0  | 91.9-98.9 | 152                   | 95.7 | 91.1-97.9 | 150        | 94.3  | 88.7-97.2 |
|                                                                                                                                                         | Yes | 12                          | 7.6   | 3.9-14.1   | 44       | 27.6 | 20.5-36.0 | 5                | 3.0   | 1.1-8.1   | 7                     | 4.3  | 2.1-8.9   | 9          | 5.7   | 2.8-11.3  |
| Been physically hurt due to them assaulting me or acting violently                                                                                      | No  | 82                          | 97.9  | 93.2-99.4  | 71       | 85.4 | 74.7-92.0 | 79               | 94.4  | 79.9-98.6 | 74                    | 89.3 | 79.5-94.7 | 57         | 68.5  | 56.4-78.5 |
|                                                                                                                                                         | Yes | 2                           | 2.1   | 0.6-6.8    | 12       | 14.7 | 8.0-25.3  | 5                | 5.6   | 1.4-20.1  | 9                     | 10.7 | 5.3-20.5  | 26         | 31.5  | 21.5-43.6 |
| Been physically hurt due to them accidentally injuring me (e.g. by falling on me)                                                                       | No  | 46                          | 89.5  | 73.4-96.3  | 30       | 59.5 | 43.6-73.5 | 49               | 97.0  | 86.4-99.4 | 49                    | 96.8 | 90.0-99.0 | 32         | 62.5  | 46.3-76.2 |
|                                                                                                                                                         | Yes | 5                           | 10.6  | 3.7-26.6   | 21       | 40.5 | 26.5-56.4 | 2                | 3.0   | 0.6-13.6  | 2                     | 3.2  | 1.0-10.0  | 19         | 37.6  | 23.8-53.7 |
| Been put at risk in a car when someone was driving after drinking                                                                                       | No  | 69                          | 99.1  | 93.7-99.9  | 46       | 66.7 | 54.0-77.4 | 66               | 95.0  | 84.4-98.5 | 59                    | 85.3 | 74.7-91.9 | 52         | 75.5  | 61.6-85.6 |
|                                                                                                                                                         | Yes | 1                           | 0.9   | 0.1-6.3    | 23       | 33.3 | 22.6-46.0 | 3                | 5.0   | 1.5-15.6  | 10                    | 14.7 | 8.1-25.3  | 17         | 24.5  | 14.4-38.4 |
| Felt forced or pressured into sex or something sexual                                                                                                   | No  | 24                          | 86.3  | 62.9-95.9  | 22       | 80.3 | 58.5-92.2 | 27               | 100.0 | -         | 23                    | 85.5 | 65.7-94.8 | 22         | 81.0  | 55.8-93.5 |
|                                                                                                                                                         | Yes | 4                           | 13.7  | 4.1-37.1   | 5        | 19.7 | 7.8-41.5  | 0                | 0.0   | -         | 4                     | 14.5 | 5.2-34.3  | 5          | 19.0  | 6.5-44.2  |
| Felt uncomfortable or anxious at a social occasion (e.g. a party)                                                                                       | No  | 294                         | 96.5  | 93.0-98.3  | 205      | 67.2 | 61.0-72.8 | 276              | 90.6  | 86.0-93.8 | 264                   | 86.7 | 81.8-90.4 | 200        | 65.6  | 59.3-71.5 |
|                                                                                                                                                         | Yes | 11                          | 3.5   | 1.8-7.0    | 100      | 32.8 | 27.2-39.0 | 29               | 9.4   | 6.2-14.1  | 41                    | 13.4 | 9.6-18.3  | 105        | 34.4  | 28.5-40.7 |
| Had someone break or damage something that mattered to me                                                                                               | No  | 87                          | 95.7  | 88.5-98.5  | 50       | 55.8 | 43.0-67.9 | 89               | 97.8  | 90.6-99.5 | 81                    | 89.9 | 80.6-95.0 | 82         | 90.9  | 82.1-95.6 |
|                                                                                                                                                         | Yes | 4                           | 4.3   | 1.5-11.5   | 40       | 44.2 | 32.1-57.0 | 2                | 2.2   | 0.5-9.4   | 9                     | 10.1 | 5.0-19.4  | 8          | 9.1   | 4.4-17.9  |
| Had money that would have improved the quality of my life spent on their alcohol-related purchases                                                      | No  | 40                          | 88.9  | 72.6-96.0  | 29       | 63.0 | 46.6-76.8 | 45               | 98.1  | 87.0-99.8 | 43                    | 95.6 | 86.2-98.7 | 44         | 97.1  | 80.6-99.6 |
|                                                                                                                                                         | Yes | 5                           | 11.1  | 4.0-27.4   | 17       | 37.0 | 23.2-53.4 | 1                | 1.9   | 0.2-13.0  | 2                     | 4.4  | 1.3-13.8  | 1          | 3.0   | 0.4-19.4  |
| Felt genuinely concerned that they may cause harm to my children or someone else's children                                                             | No  | 50                          | 98.6  | 90.0-99.8  | 47       | 91.1 | 77.3-96.9 | 49               | 95.8  | 74.8-99.4 | 36                    | 70.7 | 54.6-82.9 | 39         | 77.1  | 62.5-87.2 |
|                                                                                                                                                         | Yes | 1                           | 1.4   | 0.2-10.0   | 5        | 8.9  | 3.1-22.7  | 2                | 4.2   | 0.6-25.2  | 15                    | 29.3 | 17.1-45.4 | 12         | 22.9% | 12.8-37.5 |
| Had to spend my personal time caring for a person with a long term health condition or disability that resulted from their current or previous drinking | No  | 53                          | 97.9  | 91.0-99.5  | 41       | 75.7 | 60.0-86.6 | 53               | 97.8  | 84.9-99.7 | 49                    | 91.2 | 78.1-96.8 | 51         | 94.6  | 85.4-98.1 |
|                                                                                                                                                         | Yes | 1                           | 2.2   | 0.5-9.0    | 13       | 24.3 | 13.4-40.0 | 1                | 2.2   | 0.3-15.1  | 5                     | 8.8  | 3.2-21.9  | 3          | 5.4   | 1.9-14.6  |
| Been let down by someone due to them failing to do something that I was counting on them to do because of their drinking                                | No  | 157                         | 93.7  | 87.6-96.9  | 95       | 56.6 | 48.1-64.7 | 150              | 89.4  | 82.1-94.0 | 156                   | 93.0 | 86.7-96.5 | 162        | 96.4  | 91.9-98.5 |
|                                                                                                                                                         | Yes | 11                          | 6.4   | 3.1-12.4   | 73       | 43.5 | 35.4-51.9 | 18               | 10.6  | 6.1-17.9  | 12                    | 7.0  | 3.5-13.3  | 6          | 3.6   | 1.5-8.1   |
| Been kept awake due to noise or disruption                                                                                                              | No  | 325                         | 87.7  | 83.7-90.9  | 314      | 84.8 | 80.3-88.4 | 365              | 98.5  | 96.3-99.4 | 296                   | 80.1 | 75.0-84.3 | 187        | 50.5  | 44.7-56.2 |
|                                                                                                                                                         | Yes | 45                          | 12.3  | 9.1-16.3   | 56       | 15.2 | 11.6-19.7 | 6                | 1.5   | 0.6-3.8   | 74                    | 20.0 | 15.7-25.1 | 183        | 49.5  | 43.8-55.3 |
| Drank alcohol myself in order to cope with the problems caused by their drinking                                                                        | No  | 27                          | 92.2  | 73.8-98.0  | 22       | 75.7 | 54.3-89.1 | 28               | 95.7  | 81.5-99.1 | 26                    | 90.3 | 75.9-96.5 | 27         | 93.4  | 70.9-98.8 |
|                                                                                                                                                         | Yes | 2                           | 7.9   | 2.0-26.2   | 7        | 24.3 | 10.9-45.7 | 1                | 4.3   | 0.9-18.5  | 3                     | 9.7  | 3.5-24.1  | 2          | 6.6   | 1.2-29.1  |
| Had to stop seeing or being in contact with someone because of their drinking                                                                           | No  | 109                         | 95.8  | 86.4-98.8  | 71       | 62.4 | 52.3-71.6 | 108              | 95.0  | 87.1-98.1 | 102                   | 89.5 | 82.3-94.0 | 109        | 95.6  | 88.8-98.4 |
|                                                                                                                                                         | Yes | 5                           | 4.2   | 1.2-13.6   | 43       | 37.6 | 28.4-47.7 | 6                | 5.0   | 1.9-12.9  | 12                    | 10.5 | 6.0-17.7  | 5          | 4.4   | 1.6-11.2  |
| Had to move out of my usual place of residence and stay somewhere else                                                                                  | No  | 21                          | 100.0 | -          | 18       | 82.9 | 62.3-93.4 | 21               | 100.0 | -         | 20                    | 94.0 | 63.8-99.3 | 20         | 94.1  | 74.7-98.8 |
|                                                                                                                                                         | Yes | 0                           | 0.0   | -          | 4        | 17.1 | 6.6-37.7  | 0                | 0.0   | -         | 1                     | 6.0  | 0.7-36.2  | 1          | 5.9   | 1.2-25.3  |
| Had to contact the police                                                                                                                               | No  | 105                         | 98.4  | 93.2-99.6  | 96       | 89.5 | 81.3-94.3 | 106              | 98.7  | 91.3-99.8 | 87                    | 81.5 | 71.2-88.7 | 59         | 55.3  | 44.3-65.8 |
|                                                                                                                                                         | Yes | 2                           | 1.6   | 0.4-6.8    | 11       | 10.5 | 5.7-18.7  | 1                | 1.3   | 0.2-8.7   | 20                    | 18.5 | 11.3-28.8 | 48         | 44.7  | 34.2-55.7 |



Supplementary Table 2: Frequency of harm by harm type (as a percentage of those who experienced each harm)

|                                                                                                                                                         | Frequency                                      | Percentage | 95% CI |      |
|---------------------------------------------------------------------------------------------------------------------------------------------------------|------------------------------------------------|------------|--------|------|
| had a serious argument that did NOT include physical violence                                                                                           | Daily or almost daily (i.e. 4-7 days per week) | 1.4        | 0.4    | 4.4  |
|                                                                                                                                                         | Weekly (i.e. 1-3 times per week)               | 4.8        | 2.7    | 8.6  |
|                                                                                                                                                         | Monthly (i.e. 2-3 times per month)             | 7.0        | 4.3    | 11.3 |
|                                                                                                                                                         | Less than once a month                         | 86.7       | 81.5   | 90.6 |
| felt physically threatened                                                                                                                              | Daily or almost daily (i.e. 4-7 days per week) | 4.6        | 2.1    | 9.9  |
|                                                                                                                                                         | Weekly (i.e. 1-3 times per week)               | 4.4        | 2.0    | 9.7  |
|                                                                                                                                                         | Monthly (i.e. 2-3 times per month)             | 7.6        | 3.8    | 14.8 |
|                                                                                                                                                         | Less than once a month                         | 83.3       | 75.2   | 89.2 |
| been emotionally hurt or neglected                                                                                                                      | Daily or almost daily (i.e. 4-7 days per week) | 9.0        | 5.0    | 15.5 |
|                                                                                                                                                         | Weekly (i.e. 1-3 times per week)               | 7.6        | 4.1    | 13.4 |
|                                                                                                                                                         | Monthly (i.e. 2-3 times per month)             | 15.1       | 10.0   | 22.3 |
|                                                                                                                                                         | Less than once a month                         | 68.3       | 59.6   | 75.9 |
| been physically hurt due to them assaulting me or acting violently                                                                                      | Daily or almost daily (i.e. 4-7 days per week) | 7.1        | 2.6    | 18.2 |
|                                                                                                                                                         | Weekly (i.e. 1-3 times per week)               | 6.3        | 2.0    | 17.7 |
|                                                                                                                                                         | Monthly (i.e. 2-3 times per month)             | 11.0       | 5.5    | 20.8 |
|                                                                                                                                                         | Less than once a month                         | 75.6       | 62.8   | 85.0 |
| been physically hurt due to them accidentally injuring me (eg by falling on me)                                                                         | Daily or almost daily (i.e. 4-7 days per week) | 3.9        | 0.9    | 15.7 |
|                                                                                                                                                         | Weekly (i.e. 1-3 times per week)               | 8.1        | 2.8    | 21.3 |
|                                                                                                                                                         | Monthly (i.e. 2-3 times per month)             | 11.7       | 5.0    | 24.7 |
|                                                                                                                                                         | Less than once a month                         | 76.3       | 61.2   | 86.8 |
| been put at risk in a car when someone was driving after drinking                                                                                       | Daily or almost daily (i.e. 4-7 days per week) | 8.6        | 3.4    | 19.9 |
|                                                                                                                                                         | Weekly (i.e. 1-3 times per week)               | 3.2        | 0.7    | 13.0 |
|                                                                                                                                                         | Monthly (i.e. 2-3 times per month)             | 8.5        | 3.3    | 20.1 |
|                                                                                                                                                         | Less than once a month                         | 79.7       | 66.6   | 88.6 |
| felt forced or pressured into sex or something sexual                                                                                                   | Daily or almost daily (i.e. 4-7 days per week) | 2.4        | 0.3    | 17.6 |
|                                                                                                                                                         | Weekly (i.e. 1-3 times per week)               | 4.5        | 0.5    | 28.7 |
|                                                                                                                                                         | Monthly (i.e. 2-3 times per month)             | 2.1        | 0.3    | 15.5 |
|                                                                                                                                                         | Less than once a month                         | 91.0       | 72.0   | 97.5 |
| felt uncomfortable or anxious at a social occasion (eg a party)                                                                                         | Daily or almost daily (i.e. 4-7 days per week) | 1.5        | 0.6    | 3.9  |
|                                                                                                                                                         | Weekly (i.e. 1-3 times per week)               | 1.0        | 0.4    | 2.6  |
|                                                                                                                                                         | Monthly (i.e. 2-3 times per month)             | 8.0        | 5.3    | 12.0 |
|                                                                                                                                                         | Less than once a month                         | 89.5       | 85.2   | 92.6 |
| had someone break or damage something that mattered to me                                                                                               | Daily or almost daily (i.e. 4-7 days per week) | 3.2        | 0.9    | 10.7 |
|                                                                                                                                                         | Weekly (i.e. 1-3 times per week)               | 5.0        | 1.9    | 12.5 |
|                                                                                                                                                         | Monthly (i.e. 2-3 times per month)             | 7.4        | 3.6    | 14.5 |
|                                                                                                                                                         | Less than once a month                         | 84.4       | 74.9   | 90.8 |
| had money that would have improved the quality of my life spent on their alcohol-related purchases                                                      | Daily or almost daily (i.e. 4-7 days per week) | 6.3        | 1.9    | 19.1 |
|                                                                                                                                                         | Weekly (i.e. 1-3 times per week)               | 7.6        | 2.1    | 24.0 |
|                                                                                                                                                         | Monthly (i.e. 2-3 times per month)             | 35.8       | 21.3   | 53.4 |
|                                                                                                                                                         | Less than once a month                         | 50.3       | 33.7   | 66.7 |
| felt genuinely concerned that they may cause harm to my children or someone else's children                                                             | Daily or almost daily (i.e. 4-7 days per week) | 6.1        | 1.8    | 18.1 |
|                                                                                                                                                         | Weekly (i.e. 1-3 times per week)               | 7.1        | 2.4    | 19.2 |
|                                                                                                                                                         | Monthly (i.e. 2-3 times per month)             | 24.5       | 12.9   | 41.4 |
|                                                                                                                                                         | Less than once a month                         | 62.3       | 45.7   | 76.5 |
| had to spend my personal time caring for a person with a long term health condition or disability that resulted from their current or previous drinking | Daily or almost daily (i.e. 4-7 days per week) | 19.4       | 10.2   | 33.8 |
|                                                                                                                                                         | Weekly (i.e. 1-3 times per week)               | 15.6       | 7.5    | 29.7 |
|                                                                                                                                                         | Monthly (i.e. 2-3 times per month)             | 28.0       | 16.5   | 43.6 |
|                                                                                                                                                         | Less than once a month                         | 37.0       | 23.8   | 52.4 |
| been let down by someone due to them failing to do something that I was counting on them to do because of their drinking                                | Daily or almost daily (i.e. 4-7 days per week) | 3.9        | 1.7    | 8.6  |
|                                                                                                                                                         | Weekly (i.e. 1-3 times per week)               | 9.6        | 5.5    | 16.4 |
|                                                                                                                                                         | Monthly (i.e. 2-3 times per month)             | 13.6       | 8.9    | 20.3 |
|                                                                                                                                                         | Less than once a month                         | 72.9       | 64.6   | 79.8 |
| been kept awake due to noise or disruption                                                                                                              | Daily or almost daily (i.e. 4-7 days per week) | 2.4        | 1.3    | 4.3  |
|                                                                                                                                                         | Weekly (i.e. 1-3 times per week)               | 12.1       | 9.0    | 16.1 |
|                                                                                                                                                         | Monthly (i.e. 2-3 times per month)             | 18.4       | 14.5   | 23.2 |
|                                                                                                                                                         | Less than once a month                         | 67.1       | 61.7   | 72.2 |
| drank alcohol myself in order to cope with the problems caused by their drinking                                                                        | Daily or almost daily (i.e. 4-7 days per week) | 5.2        | 1.0    | 22.4 |
|                                                                                                                                                         | Weekly (i.e. 1-3 times per week)               | 20.7       | 8.1    | 43.5 |
|                                                                                                                                                         | Monthly (i.e. 2-3 times per month)             | 42.5       | 23.0   | 64.8 |
|                                                                                                                                                         | Less than once a month                         | 31.6       | 14.9   | 54.9 |
| had to stop seeing or being in contact with someone because of their drinking                                                                           | Daily or almost daily (i.e. 4-7 days per week) | 19.3       | 11.9   | 29.6 |
|                                                                                                                                                         | Weekly (i.e. 1-3 times per week)               | 10.4       | 5.5    | 18.7 |

|   | Frequency                                      | Percentage | 95% CI |      |
|---|------------------------------------------------|------------|--------|------|
| 1 | Monthly (i.e. 2-3 times per month)             | 9.4        | 5.2    | 16.5 |
| 2 | Less than once a month                         | 61.0       | 50.1   | 70.8 |
| 3 | Daily or almost daily (i.e. 4-7 days per week) | 8.1        | 1.6    | 31.8 |
| 4 | Weekly (i.e. 1-3 times per week)               | 12.0       | 2.5    | 42.1 |
| 5 | Monthly (i.e. 2-3 times per month)             | 6.1        | 1.3    | 24.8 |
| 6 | Less than once a month                         | 73.8       | 47.4   | 89.8 |
| 7 | Daily or almost daily (i.e. 4-7 days per week) | 7.8        | 3.6    | 16.2 |
| 8 | Weekly (i.e. 1-3 times per week)               | 6.5        | 2.6    | 15.5 |
| 9 | Monthly (i.e. 2-3 times per month)             | 7.5        | 3.8    | 14.1 |
|   | Less than once a month                         | 78.2       | 67.9   | 85.9 |

For peer review only

**STROBE 2007 (v4) Statement—Checklist of items that should be included in reports of *cross-sectional studies***

| Section/Topic             | Item # | Recommendation                                                                                                                                                                       | Reported on page #             |
|---------------------------|--------|--------------------------------------------------------------------------------------------------------------------------------------------------------------------------------------|--------------------------------|
| <b>Title and abstract</b> | 1      | (a) Indicate the study’s design with a commonly used term in the title or the abstract                                                                                               | 1                              |
|                           |        | (b) Provide in the abstract an informative and balanced summary of what was done and what was found                                                                                  | 2                              |
| <b>Introduction</b>       |        |                                                                                                                                                                                      |                                |
| Background/rationale      | 2      | Explain the scientific background and rationale for the investigation being reported                                                                                                 | 3                              |
| Objectives                | 3      | State specific objectives, including any prespecified hypotheses                                                                                                                     | 3                              |
| <b>Methods</b>            |        |                                                                                                                                                                                      |                                |
| Study design              | 4      | Present key elements of study design early in the paper                                                                                                                              | 3                              |
| Setting                   | 5      | Describe the setting, locations, and relevant dates, including periods of recruitment, exposure, follow-up, and data collection                                                      | 3                              |
| Participants              | 6      | (a) Give the eligibility criteria, and the sources and methods of selection of participants                                                                                          | 3                              |
| Variables                 | 7      | Clearly define all outcomes, exposures, predictors, potential confounders, and effect modifiers. Give diagnostic criteria, if applicable                                             | 4                              |
| Data sources/ measurement | 8*     | For each variable of interest, give sources of data and details of methods of assessment (measurement). Describe comparability of assessment methods if there is more than one group | 3-4                            |
| Bias                      | 9      | Describe any efforts to address potential sources of bias                                                                                                                            | 3 (sampling) and 5 (weighting) |
| Study size                | 10     | Explain how the study size was arrived at                                                                                                                                            | 3-4                            |
| Quantitative variables    | 11     | Explain how quantitative variables were handled in the analyses. If applicable, describe which groupings were chosen and why                                                         | 5                              |
| Statistical methods       | 12     | (a) Describe all statistical methods, including those used to control for confounding                                                                                                | 5                              |
|                           |        | (b) Describe any methods used to examine subgroups and interactions                                                                                                                  | 5                              |
|                           |        | (c) Explain how missing data were addressed                                                                                                                                          | 5                              |
|                           |        | (d) If applicable, describe analytical methods taking account of sampling strategy                                                                                                   | 5                              |
|                           |        | (e) Describe any sensitivity analyses                                                                                                                                                | NA                             |

|                          |     |                                                                                                                                                                                                              |                                                                            |
|--------------------------|-----|--------------------------------------------------------------------------------------------------------------------------------------------------------------------------------------------------------------|----------------------------------------------------------------------------|
| <b>Results</b>           |     |                                                                                                                                                                                                              |                                                                            |
| Participants             | 13* | (a) Report numbers of individuals at each stage of study—eg numbers potentially eligible, examined for eligibility, confirmed eligible, included in the study, completing follow-up, and analysed            | 5                                                                          |
|                          |     | (b) Give reasons for non-participation at each stage                                                                                                                                                         | NA                                                                         |
|                          |     | (c) Consider use of a flow diagram                                                                                                                                                                           | NA                                                                         |
| Descriptive data         | 14* | (a) Give characteristics of study participants (eg demographic, clinical, social) and information on exposures and potential confounders                                                                     | 8 and 10                                                                   |
|                          |     | (b) Indicate number of participants with missing data for each variable of interest                                                                                                                          | Not included due to space. We can add this as another supplementary table. |
| Outcome data             | 15* | Report numbers of outcome events or summary measures                                                                                                                                                         | 8 and 10                                                                   |
| Main results             | 16  | (a) Give unadjusted estimates and, if applicable, confounder-adjusted estimates and their precision (eg, 95% confidence interval). Make clear which confounders were adjusted for and why they were included | 5-11                                                                       |
|                          |     | (b) Report category boundaries when continuous variables were categorized                                                                                                                                    | NA                                                                         |
|                          |     | (c) If relevant, consider translating estimates of relative risk into absolute risk for a meaningful time period                                                                                             | NA                                                                         |
| Other analyses           | 17  | Report other analyses done—eg analyses of subgroups and interactions, and sensitivity analyses                                                                                                               | NA                                                                         |
| <b>Discussion</b>        |     |                                                                                                                                                                                                              |                                                                            |
| Key results              | 18  | Summarise key results with reference to study objectives                                                                                                                                                     | 12                                                                         |
| Limitations              | 19  | Discuss limitations of the study, taking into account sources of potential bias or imprecision. Discuss both direction and magnitude of any potential bias                                                   | 12                                                                         |
| Interpretation           | 20  | Give a cautious overall interpretation of results considering objectives, limitations, multiplicity of analyses, results from similar studies, and other relevant evidence                                   | 12-14                                                                      |
| Generalisability         | 21  | Discuss the generalisability (external validity) of the study results                                                                                                                                        | 12                                                                         |
| <b>Other information</b> |     |                                                                                                                                                                                                              |                                                                            |
| Funding                  | 22  | Give the source of funding and the role of the funders for the present study and, if applicable, for the original study on which the present article is based                                                | 5                                                                          |

\*Give information separately for cases and controls in case-control studies and, if applicable, for exposed and unexposed groups in cohort and cross-sectional studies.

1  
2  
3  
4  
5  
6  
7  
8  
9  
10  
11  
12  
13  
14  
15  
16  
17  
18  
19  
20  
21  
22  
23  
24  
25  
26  
27  
28  
29  
30  
31  
32  
33  
34  
35  
36  
37  
38  
39  
40  
41  
42  
43  
44  
45  
46  
47

**Note:** An Explanation and Elaboration article discusses each checklist item and gives methodological background and published examples of transparent reporting. The STROBE checklist is best used in conjunction with this article (freely available on the Web sites of PLoS Medicine at <http://www.plosmedicine.org/>, Annals of Internal Medicine at <http://www.annals.org/>, and Epidemiology at <http://www.epidem.com/>). Information on the STROBE Initiative is available at [www.strobe-statement.org](http://www.strobe-statement.org).

For peer review only

# BMJ Open

## Alcohol-related harm to others in England: a cross-sectional analysis of National survey data

|                                 |                                                                                                                                                                                                                                                                                                                                                                                                                                                                                                                                                                                                                                        |
|---------------------------------|----------------------------------------------------------------------------------------------------------------------------------------------------------------------------------------------------------------------------------------------------------------------------------------------------------------------------------------------------------------------------------------------------------------------------------------------------------------------------------------------------------------------------------------------------------------------------------------------------------------------------------------|
| Journal:                        | <i>BMJ Open</i>                                                                                                                                                                                                                                                                                                                                                                                                                                                                                                                                                                                                                        |
| Manuscript ID                   | bmjopen-2017-021046.R1                                                                                                                                                                                                                                                                                                                                                                                                                                                                                                                                                                                                                 |
| Article Type:                   | Research                                                                                                                                                                                                                                                                                                                                                                                                                                                                                                                                                                                                                               |
| Date Submitted by the Author:   | 17-May-2018                                                                                                                                                                                                                                                                                                                                                                                                                                                                                                                                                                                                                            |
| Complete List of Authors:       | Beynon, Caryl; Public Health England, Risk Factors Intelligence Team, Health Improvement Directorate<br>Bayliss, David; Public Health England, Risk Factors Intelligence Team, Health Improvement Directorate<br>Mason, Jenny; Public Health England, Risk Factors Intelligence Team, Health Improvement Directorate<br>Sweeney, Kate; Public Health England, Risk Factors Intelligence, Health Improvement Directorate<br>Perkins, Clare; Public Health England, Risk Factors Intelligence, Health Improvement Directorate<br>Henn, Clive; Public Health England, Alcohol, Drugs and Tobacco Division, Health Improvement Directorate |
| <b>Primary Subject Heading</b>: | Public health                                                                                                                                                                                                                                                                                                                                                                                                                                                                                                                                                                                                                          |
| Secondary Subject Heading:      | Epidemiology, Health policy                                                                                                                                                                                                                                                                                                                                                                                                                                                                                                                                                                                                            |
| Keywords:                       | alcohol-related harm to others, alcohol, violence                                                                                                                                                                                                                                                                                                                                                                                                                                                                                                                                                                                      |
|                                 |                                                                                                                                                                                                                                                                                                                                                                                                                                                                                                                                                                                                                                        |

SCHOLARONE™  
Manuscripts

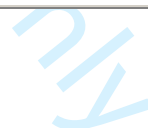

Alcohol-related harm to others in England: a cross-sectional analysis of National survey data

Beynon C, Bayliss D, Mason J, Sweeney K, Perkins, C, Henn C

Corresponding author: Caryl Beynon

Address: Risk Factor Intelligence Team, Health Improvement Directorate, Public Health England, Suite 3b, Cunard Building, Water Street, Liverpool, L3 1DS, United Kingdom

Email: [caryl.beynon@phe.gov.uk](mailto:caryl.beynon@phe.gov.uk)

Telephone: 0151 706 6205

Co-Authors:

David Bayliss, Risk Factors Intelligence Team, Public Health England, Manchester, United Kingdom.

Jenny Mason, Risk Factors Intelligence Team, Public Health England, Liverpool, United Kingdom.

Kate Sweeney, Risk Factors Intelligence Team, Public Health England, Liverpool, United Kingdom.

Clare Perkins, Risk Factors Intelligence Team, Public Health England, Liverpool, United Kingdom.

Clive Henn, Alcohol, Drugs and Tobacco Division, Public Health England, London, United Kingdom.

## ABSTRACT

Objectives: to estimate the prevalence, the frequency and the perpetrators of alcohol-related harm to others and identify factors associated with experiencing harm and aggressive harm.

Design: Cross-sectional survey.

Setting: England.

Participants: Adults (general population) aged 16 and over.

Outcome measures: Percentage of respondents who experienced harm. Socio-economic and demographic factors (exposures) associated with the outcome (harm/no harm and aggressive harm/no aggressive harm [physically threatened, physically hurt and forced/pressured into something sexual]) were identified.

Results: The weighted sample was 4,874; 20.1% (95% confidence interval [CI] 18.9-21.4) reported experiencing harm in the previous 12 months and 4.6% (95% CI 4.0-5.4) reported experiencing an aggressive harm. Friends and strangers were the dominant perpetrators of harm. Most harms occurred less than monthly but 5.2% of respondents experienced harm daily/almost daily. Factors associated with experiencing harm were: younger age, drinking harmfully/hazardously, White British, having a disability, being educated and living in private rented accommodation (compared to being an owner occupier). Being in the family stage of life (defined as having children in the household) and being retired (compared to being employed) had significantly lower odds of harm. Factors associated with experiencing an aggressive harm were similar.

Conclusions: This exploratory study shows that alcohol-related harm to others affects a sizable proportion of the population of England. Even apparently insignificant harms, like being kept awake, can have a negative impact on health, while aggressive harms are clearly of concern. That 5% of respondents experience harm daily/almost daily suggests a population of people with a particularly high burden likely to affect health. Using a standard methodology to measure harm across studies would be advantageous. Policies that focus on alcohol must take into consideration the impact of drinking on those other than the drinker.

## STRENGTHS AND LIMITATIONS OF THE STUDY

- This is the largest survey on alcohol-related harm to others in the United Kingdom and the first national survey in England.
- The sampling approach and weighting ensured the data were representative of the population of England.
- There is potential selection bias which is inherent in all national surveys.
- The use of a bespoke survey made comparison of the findings with the literature difficult but when the study was initiated no universally accepted survey was identified.

Key words: alcohol-related harm to others, alcohol, violence

Word count: 5849



## INTRODUCTION

1  
2 The detrimental effect of alcohol is well documented; in 2012 alcohol consumption was  
3 responsible for approximately 6% of deaths and 5% of disease burden globally.<sup>1</sup> The focus has  
4 been on the harmful effects of alcohol on the drinker with less attention on the harms caused to  
5 others, including families, work colleagues and wider society. The World Health Organization's  
6 (WHO) global alcohol strategy highlights the need to consider the harm alcohol causes to people  
7 other than the drinker,<sup>2</sup> and it is these alcohol-related harms to others (AHTO) that are the focus of  
8 this study.  
9

10 Health and social data provide insight into the potential harms caused by another's drinking. Data  
11 from the Crime Survey for England and Wales, for example, show that in just over half of all violent  
12 crimes the victim perceived the offender to be under the influence of alcohol and that alcohol use  
13 is particularly implicated in violent incidents between strangers.<sup>3</sup> Data from the Department of  
14 Transport show that during 2013 to 2015, there were almost 10,000 alcohol-related road traffic  
15 accidents in England which at least one driver failed the alcohol breathalyser test (data are  
16 available at: <https://fingertips.phe.org.uk/profile/local-alcohol-profiles>), demonstrating a  
17 considerable potential harm to both the drinking driver and to others on the roads.  
18  
19

20 In the last decade or so a number of studies have aimed to quantify and explore in more detail  
21 AHTO. These studies have provided widely varying estimates of the prevalence of harm, largely  
22 due to differences in the way harms are defined and the reference population. Studies which focus  
23 on identifying the socio-demographic and behavioural factors associated with being the victim of  
24 harm do not always provide consistent findings, suggesting the need for further research. While  
25 there is a relatively consistent finding across studies that younger age increases the likelihood of  
26 experiencing harm<sup>4-6</sup>, the association of harm with other characteristics is less clear. For example,  
27 generally women have been identified as more at risk of harm from another's drinking than men  
28 but this is not consistent across all countries and some authors report this association for certain  
29 types of harm only.<sup>4-7</sup> Two studies have, for example, identified that women are more likely to  
30 experience unwanted sexual attention/harassment/assault, whereas men were more likely to  
31 experience having their belongings or property damaged.<sup>4,6</sup>  
32  
33

34 When the impact of alcohol includes the effects to the individual drinker and wider society, the cost  
35 is considerable. A review of studies in high-income countries show the gross economic costs of  
36 alcohol to range from 1.4% to 2.7% of gross domestic product; in the United Kingdom this would  
37 be equivalent to between £27 billion and £52 billion in 2016.<sup>8</sup> There is a need to better understand  
38 AHTO and the characteristics of those affected in order to implement an effective response. To  
39 date there has been no national survey of AHTO in England. The objectives of this exploratory  
40 study were to estimate the prevalence of AHTO in England, identify factors associated with being  
41 the victim of harm, the frequency with which this harm occurs and the perpetrators of harm.  
42  
43  
44

## METHOD

### The survey

45  
46  
47  
48 The questions to identify experience of AHTO were devised after an evidence review and were  
49 appended to the Alcohol Toolkit Survey (ATS) between 1<sup>st</sup> November 2015 and 31<sup>st</sup> January 2016.  
50 The ATS is a cross-sectional household survey, run by University College London and  
51 administered by Ipsos Mori using computer-assisted interviews. Each month a new sample of  
52 adults aged 16 and over who live in England complete the survey. Households are selected using  
53 a type of random location sampling which is a hybrid of random probability sampling and simple  
54 quota sampling (so that each monthly sample is representative of the population). Interviews are  
55 conducted with one member of the selected household.<sup>9</sup> The AHTO questions were self-  
56  
57  
58  
59  
60

completed on guidance from the Research Support and Governance Office, Public Health England. Due to the novel and exploratory nature of the work, no formal sample size calculation was undertaken as the parameters on which to base this were unknown. Instead, a three month window of data collection was chosen, knowing that the ATS aimed to survey approximately 1,800 adults per month.<sup>9</sup>

The AHTO questions asked whether or not the respondent had experienced the following harms from another's drinking in the past 12 months:

Because of someone else's drinking I have....

1. Had a serious argument that did not include physical violence.
2. Felt physically threatened.
3. Been emotionally hurt or neglected.
4. Been physically hurt due to them assaulting me or acting violently.
5. Been physically hurt due to them accidentally injuring me (e.g. by falling on me).
6. Been put at risk in a car when someone was driving after drinking.
7. Felt forced or pressured into sex or something sexual.
8. Felt uncomfortable or anxious at a social occasion (e.g. a party).
9. Had someone break or damage something that mattered to me.
10. Had money that would have improved the quality of my life spent on their alcohol-related purchases.
11. Felt genuinely concerned that they may cause harm to my children or someone else's children.
12. Had to spend my personal time caring for a person with a long term health condition or disability that resulted from their current or previous drinking.
13. Been let down by someone due to them failing to do something that I was counting on them to do because of their drinking.
14. Been kept awake due to noise or disruption.
15. Drank alcohol myself in order to cope with the problems caused by their drinking.
16. Had to stop seeing or being in contact with someone because of their drinking.
17. Had to move out of my usual place of residence and stay somewhere else.
18. Had contact with the police.

If a respondent indicated that they had experienced any of the harms they were asked to indicate who perpetrated the harm and the frequency with which the harm occurred. Response options for who perpetrated the harm were: someone you were in a relationship with (e.g. wife/husband, partner) who you lived with; someone you were in a relationship with (e.g. wife/husband, partner) who you did not live with; another family member you lived with; a family member you did not live with; someone else you lived with; a friend; a work colleague; someone else you know; a stranger; refused/prefer not to say and don't know. Response options for the frequency of harm were: daily or almost daily (i.e. 4-7 days per week); weekly (i.e. 1-3 times per week); monthly (i.e. 2-3 times per month); less than once a month; refused/prefer not to say and don't know.

A range of demographic and socio-economic variables, collected as part of the ATS, were used as independent variables: sex (female, male); age band in years (16-24, 25-44, 45-64, 65 and over); broad ethnic group (White British, Other White, Black, Asian, Other); life stage (single, pre-family, family, post-family); educational attainment (no qualifications, GSCE/O-level/CSE, A-level/vocational, degree/higher degree, other/still studying); social grade (AB [higher managerial, administrative and professional], C1 [supervisory, clerical and junior managerial, administrative and professional], C2 [skilled manual workers], D [semi-skilled and unskilled manual workers], E [state pensioners, casual and lowest grade workers, unemployed with state benefits only]); tenure of home (owned outright, bought on a mortgage, rented from local authority, rented from private landlord, other); self-defined disability (yes, no) and employment status (employed, unemployed,

economically inactive, retired). 'Life stage' was derived from age, marital status and number of children living in the household and is defined as follow: single (up to the age of 39, not married/in a civil partnership and no children in the household), pre-family (up to the age of 39, married/in a civil partnership and no children in the household), family (children living in the household) and post family (aged 40 and over, no children in the household). The respondents' alcohol consumption was measured using the Alcohol Use Disorders Identification Test (AUDIT) which can be used to identify hazardous and harmful drinkers. Here hazardous/harmful drinkers were identified as those with scores of eight or more if aged 65 or under, and scores of seven or more if aged over 65, in line with WHO guidance.<sup>10</sup>

## Analysis

Respondents who refused to complete the AHTO questions and those who chose the 'don't know' or 'refused/prefer not to say' responses for all 18 harm questions were excluded from all analyses. Chi square tests were used to compare the characteristics of those who were included in the analysis to those that were excluded due to missing data on the AHTO questions. Individuals who failed to provide a valid response to other questions were excluded from the analysis of that particular independent variable. People with one or more missing covariate were excluded from the multivariate analyses.

Two binary dependent variables were created. 'Any harm' was coded as yes if a person had experienced any of the 18 harm types in the previous 12 months. 'Aggressive harm' was coded as yes if the person had experienced one or more of the following three harms: felt physically threatened, been physically hurt due to them assaulting me or acting violently and felt forced or pressured into sex or something sexual. The categorisation of 'aggressive harm' is in line with previous research on AHTO.<sup>4</sup>

All analyses were undertaken using Stata 13 and the 'svy' command prefix for analysing survey data. Prevalence was estimated by dividing the positive responses by the total responses for each harm type, any harm and aggressive harm; 95% confidence intervals (CI) were calculated for each prevalence estimate using the standard settings of Stata's 'svy: tabulate' command.<sup>11</sup> Bivariate independence was tested using a 'corrected' Pearson chi-squared statistic for survey data [design-based *F* tests based on Rao and Scott correction].<sup>12</sup> Multivariate analyses (binary logistic regression) were conducted to model the joint effects of the independent variables significantly associated with any harm and aggressive harm in the bivariate analyses with 'no harm' and 'no aggressive harm' as the reference categories. Adjusted odds ratios (AOR) are given in comparison to the reference category for the given variable and *t* tests provide an indication of statistical significance. Where comparisons are presented between categories of a variable where neither is the reference category, an indication of statistical significance is given using adjusted Wald tests. Analyses were weighted (using weights generated by the ATS) in order to improve the representativeness of the sample relative to an English population profile using multiple socio-demographic variables.<sup>9</sup> Due to the exploratory nature of the analysis,  $\alpha$  is set at 0.05 for all tests. The risk of type I error is considered less important than the risk of type II error: deflating  $\alpha$  may limit further investigation at a point where the evidence base is developing.

## Patient and public involvement

Patients and the public were not involved in this study.

## Ethics and funding

Approval for the ATS was granted by University College London's ethics committee (reference: 0498/001) and for the AHTO questions by the Research Support and Governance Office, Public Health England (reference: R&D 055). This work was funded by Public Health England.

## RESULTS

### Missing data

The original (unweighted) sample size was 5,068. The proportion of missing data was relatively small; 96 people (1.9%) did not complete the AHTO questions and a further 91 (1.8%) answered 'don't know/refused' to all of the AHTO questions; both groups were excluded from the analyses leaving an unweighted sample size of 4,881 (or 96.3% of the original sample). Supplementary Table 1 compares the number/proportion of people included in the analyses with those who were excluded because they did not provide a response to the AHTO questions, by independent variable. There were significant differences in the proportion of people that were included and excluded for sex, tenure of home, disability and AUDIT score. Of the 4,881 people included in the bivariate analyses, 189 (3.9%) were excluded from the multivariate analyses because one or more independent variable was missing.

### Prevalence of harm

Table 1 reports the estimated prevalence of each type of harm; 20.1% (95% CI 18.9%-21.4%) of people reported experiencing at least one harm due to someone else's drinking in the past 12 months. These data by sex are reported in Supplementary Table 2. While the numbers are too small to make a comprehensive assessment of the differences by sex (and such differences are not the focus of this paper), some disparities in harm are evident. Aggressive harms were experienced by 4.6% (95% CI 4.0%-5.4%) of respondents.

Table 1: Prevalence of harm in the previous 12 months, weighted data

| Harm type                                                                                                                                               | Number of respondents who experienced harm | Percentage of respondents who experienced harm | 95% CI      |
|---------------------------------------------------------------------------------------------------------------------------------------------------------|--------------------------------------------|------------------------------------------------|-------------|
| Been kept awake due to noise or disruption                                                                                                              | 390                                        | 8.0                                            | 7.2 - 8.9   |
| Felt uncomfortable or anxious at a social occasion (e.g. a party)                                                                                       | 331                                        | 6.8                                            | 6.0 - 7.6   |
| Had a serious argument that did NOT include physical violence                                                                                           | 275                                        | 5.7                                            | 5.0 - 6.4   |
| Been let down by someone due to them failing to do something that I was counting on them to do because of their drinking                                | 174                                        | 3.6                                            | 3.0 - 4.2   |
| Been emotionally hurt or neglected                                                                                                                      | 170                                        | 3.5                                            | 3.0 - 4.1   |
| Felt physically threatened                                                                                                                              | 164                                        | 3.4                                            | 2.8 - 4.0   |
| Had to stop seeing or being in contact with someone because of their drinking                                                                           | 120                                        | 2.5                                            | 2.0 - 3.0   |
| Had to contact the police                                                                                                                               | 117                                        | 2.4                                            | 2.0 - 2.9   |
| Had someone break or damage something that mattered to me                                                                                               | 95                                         | 1.9                                            | 1.5 - 2.5   |
| Been physically hurt due to them assaulting me or acting violently                                                                                      | 92                                         | 1.9                                            | 1.5 - 2.4   |
| Been put at risk in a car when someone was driving after drinking                                                                                       | 75                                         | 1.5                                            | 1.2 - 2.0   |
| Felt genuinely concerned that they may cause harm to my children or someone else's children                                                             | 61                                         | 1.2                                            | 0.9 - 1.6   |
| Had to spend my personal time caring for a person with a long term health condition or disability that resulted from their current or previous drinking | 57                                         | 1.2                                            | 0.9 - 1.5   |
| Been physically hurt due to them accidentally injuring me (e.g. by falling on me)                                                                       | 53                                         | 1.1                                            | 0.8 - 1.5   |
| Had money that would have improved the quality of my life spent on their alcohol-related purchases                                                      | 50                                         | 1.0                                            | 0.8 - 1.4   |
| Drank alcohol myself in order to cope with the problems caused by their drinking                                                                        | 33                                         | 0.7                                            | 0.5 - 1.0   |
| Felt forced or pressured into sex or something sexual                                                                                                   | 33                                         | 0.7                                            | 0.5 - 1.0   |
| Had to move out of my usual place of residence and stay somewhere else                                                                                  | 25                                         | 0.5                                            | 0.3 - 0.8   |
| At least one reported harm                                                                                                                              | 980                                        | 20.1                                           | 18.9 - 21.4 |
| At least one aggressive harm                                                                                                                            | 225                                        | 4.6                                            | 4.0 - 5.4   |

Weighted N = 4,874.

### Bivariate and multivariate results (factors associated with harm)

Factors associated with experiencing any harm in the bivariate analyses are reported in Table 2. Experience of harm decreased with age. This trend by age was reflected in experience of harm by life stage, with 36.5% (95% CI 32.8%-40.5%) of single people experiencing harm compared to 15.0% (95% CI 13.4%-16.7%) of those in a 'post-family' life stage. White British people were more likely to report experiencing harm (21.8%, 95% CI 20.3%-23.4%) than people of other broad ethnic groups; people of Asian ethnicity had the lowest prevalence (10.9%, 95% CI 8.2%-14.2%). People with no qualifications were least likely to report experiencing harm (9.9%, 95% CI 7.9%-12.5%). Those whose highest attainment was A-level or vocational had the highest prevalence (26.7%, 95% CI 24.1%-29.3%). People in the private-rented sector had the highest harm prevalence by tenure (29.9%, 95% CI 26.9%-33.1%). This compares to just 14.0% (95% CI 12.3%-16.0%) of people who owned their home outright experiencing harm. People who considered themselves disabled were more likely to report having experienced harm than those who did not (24.0%, 95% CI 20.3%-28.1%, compared to 19.7%, 95% CI 18.4%-21.1%). Those who were unemployed (26.8%, 95% CI 21.0%-33.6%) or economically inactive (26.8%, 95% CI 24.0%-29.9%) were more likely to report harm than those employed (22.0%, 95% CI 20.2%-24.0%); the difference between the unemployed and employed was not significant. Retired people were much less likely to report experiencing at least one harm (9.1%, 95% CI 7.5%-10.9%) than all other employment statuses. The prevalence of AHTO

1 was significantly higher among hazardous/harmful drinkers (37.9%, 95% CI 33.9%-42.1%)  
2 compared to those who were not (17.3%, 95% CI 16.0%-18.6%).  
3

4 In the multivariate model, young age remained a strong risk factor for experiencing harm  
5 due to someone else's drinking, with those aged 16-24 significantly more likely to report  
6 experiencing harm than all older age groups (Table 2). Being a hazardous/harmful drinker  
7 was a strong risk factor, with odds of experiencing harm around double the odds of those  
8 who were not hazardous/harmful drinkers. Being White British compared to being in an  
9 Other White, Black or Asian ethnic group was also associated with increased risk of  
10 experiencing harm, as was considering oneself disabled, being educated, and living in  
11 private rented accommodation relative to being an owner occupier. Being in the family  
12 stage of life reduced the odds of experiencing harm compared to those that were single, as  
13 did being retired compared to those who were employed.  
14  
15  
16  
17  
18  
19  
20  
21  
22  
23  
24  
25  
26  
27  
28  
29  
30  
31  
32  
33  
34  
35  
36  
37  
38  
39  
40  
41  
42  
43  
44  
45  
46  
47  
48  
49  
50  
51  
52  
53  
54  
55  
56  
57  
58  
59  
60

Table 2: Bivariate and multivariate comparisons of harm versus no harm from another's drinking in past 12 months, weighted data

| Independent variable                  | Bivariate comparisons |      |             |      |      |             | Multivariate comparisons   |        |             |
|---------------------------------------|-----------------------|------|-------------|------|------|-------------|----------------------------|--------|-------------|
|                                       | No harm               |      |             | Harm |      |             | AOR                        | p      | 95% CI      |
|                                       | N                     | %    | 95% CI      | N    | %    | 95% CI      |                            |        |             |
| <b>Sex</b>                            |                       |      |             |      |      |             |                            |        |             |
| Female                                | 2,008                 | 80.1 | 78.3 - 81.8 | 498  | 19.9 | 18.2 - 21.7 | Not entered into the model |        |             |
| Male                                  | 1,887                 | 79.7 | 77.7 - 81.4 | 482  | 20.3 | 18.6 - 22.3 |                            |        |             |
| <b>Age band<sup>†</sup></b>           |                       |      |             |      |      |             |                            |        |             |
| 16-24                                 | 446                   | 63.4 | 59.6 - 67.0 | 258  | 36.6 | 33.0 - 40.4 | Reference                  |        |             |
| 25-44                                 | 1,278                 | 78.4 | 76.0 - 80.7 | 352  | 21.6 | 19.3 - 24.0 | 0.63                       | <0.001 | 0.49 - 0.83 |
| 45-64                                 | 1,237                 | 81.5 | 79.1 - 83.7 | 281  | 18.5 | 16.3 - 20.9 | 0.50                       | <0.001 | 0.34 - 0.75 |
| 65+                                   | 933                   | 91.2 | 89.3 - 92.9 | 90   | 8.8  | 7.1 - 10.7  | 0.36                       | <0.001 | 0.21 - 0.61 |
| <b>Broad ethnic group<sup>†</sup></b> |                       |      |             |      |      |             |                            |        |             |
| White British                         | 2,975                 | 78.2 | 76.7 - 79.7 | 830  | 21.8 | 20.3 - 23.4 | Reference                  |        |             |
| Other White groups                    | 334                   | 84.9 | 80.4 - 88.5 | 59   | 15.1 | 11.5 - 19.6 | 0.52                       | <0.001 | 0.36 - 0.76 |
| Black groups                          | 151                   | 83.9 | 78.6 - 88.1 | 29   | 16.1 | 11.9 - 21.4 | 0.61                       | 0.017  | 0.41 - 0.92 |
| Asian groups                          | 376                   | 89.1 | 85.8 - 91.8 | 46   | 10.9 | 8.2 - 14.2  | 0.39                       | <0.001 | 0.28 - 0.56 |
| Other groups                          | 44                    | 82.2 | 68.7 - 90.7 | 9    | 17.8 | 9.3 - 31.3  | 0.60                       | 0.154  | 0.30 - 1.21 |
| <b>Life stage<sup>†</sup></b>         |                       |      |             |      |      |             |                            |        |             |
| Single                                | 436                   | 63.5 | 59.5 - 67.2 | 251  | 36.5 | 32.8 - 40.5 | Reference                  |        |             |
| Pre-family                            | 222                   | 72.2 | 65.6 - 77.9 | 86   | 27.8 | 22.1 - 34.4 | 0.91                       | 0.620  | 0.61 - 1.34 |
| Family                                | 1,285                 | 81.1 | 78.8 - 83.2 | 299  | 18.9 | 16.8 - 21.2 | 0.68                       | 0.006  | 0.52 - 0.89 |
| Post family                           | 1,950                 | 85.0 | 83.3 - 86.6 | 344  | 15.0 | 13.4 - 16.7 | 0.85                       | 0.433  | 0.56 - 1.28 |
| <b>Education<sup>†</sup></b>          |                       |      |             |      |      |             |                            |        |             |
| No qualifications                     | 683                   | 90.1 | 87.5 - 92.2 | 75   | 9.9  | 7.8 - 12.5  | Reference                  |        |             |
| GCSE/O-level/CSE                      | 764                   | 79.3 | 76.2 - 82.1 | 199  | 20.7 | 17.9 - 23.8 | 1.74                       | <0.001 | 1.25 - 2.44 |
| A-level/vocational                    | 974                   | 73.3 | 70.7 - 75.9 | 354  | 26.7 | 24.1 - 29.3 | 2.04                       | <0.001 | 1.48 - 2.82 |
| Degree/higher degree                  | 1,156                 | 79.3 | 76.8 - 81.7 | 301  | 20.7 | 18.3 - 23.2 | 2.16                       | <0.001 | 1.56 - 3.00 |
| Other/still studying                  | 294                   | 85.6 | 81.2 - 89.1 | 50   | 14.4 | 10.9 - 18.9 | 1.42                       | 0.109  | 0.92 - 2.18 |
| <b>Social grade<sup>‡</sup></b>       |                       |      |             |      |      |             |                            |        |             |
| AB                                    | 1,066                 | 80.8 | 78.0 - 83.3 | 254  | 19.2 | 16.7 - 22.0 | Not entered into the model |        |             |
| C1                                    | 1,023                 | 77.4 | 75.0 - 79.6 | 299  | 22.6 | 20.4 - 25.0 |                            |        |             |
| C2                                    | 878                   | 81.7 | 78.8 - 84.4 | 196  | 18.3 | 15.6 - 21.2 |                            |        |             |
| D                                     | 614                   | 82.5 | 79.1 - 85.4 | 131  | 17.5 | 14.6 - 20.9 |                            |        |             |
| E                                     | 313                   | 75.8 | 71.8 - 79.4 | 100  | 24.2 | 20.6 - 28.2 |                            |        |             |
| <b>Tenure<sup>†</sup></b>             |                       |      |             |      |      |             |                            |        |             |
| Owned outright                        | 1,451                 | 86.0 | 84.0 - 87.8 | 237  | 14.0 | 12.3 - 16.0 | Reference                  |        |             |
| Bought on a mortgage                  | 1,142                 | 79.2 | 76.4 - 81.6 | 301  | 20.9 | 18.4 - 23.6 | 0.97                       | 0.825  | 0.74 - 1.28 |
| Rented from local authority           | 341                   | 78.8 | 74.6 - 82.5 | 92   | 21.2 | 17.6 - 25.4 | 1.38                       | 0.060  | 0.99 - 1.94 |
| Rented from private landlord          | 678                   | 70.1 | 66.9 - 73.1 | 289  | 29.9 | 26.9 - 33.1 | 1.52                       | 0.004  | 1.15 - 2.01 |
| Other                                 | 248                   | 81.1 | 76.7 - 84.8 | 58   | 19.0 | 15.2 - 23.4 | 1.11                       | 0.562  | 0.77 - 1.61 |
| <b>Disability<sup>†</sup></b>         |                       |      |             |      |      |             |                            |        |             |
| Considers self disabled               | 396                   | 76.0 | 71.9 - 79.7 | 125  | 24.0 | 20.3 - 28.1 | Reference                  |        |             |
| Not disabled                          | 3,422                 | 80.3 | 78.9 - 81.6 | 842  | 19.7 | 18.4 - 21.1 | 0.56                       | <0.001 | 0.42 - 0.74 |
| <b>Employment status<sup>†</sup></b>  |                       |      |             |      |      |             |                            |        |             |
| Employed                              | 2,081                 | 78.0 | 76.0 - 79.8 | 588  | 22.0 | 20.2 - 24.0 | Reference                  |        |             |
| Unemployed                            | 157                   | 73.2 | 66.4 - 79.0 | 58   | 26.8 | 21.0 - 33.6 | 1.09                       | 0.648  | 0.75 - 1.58 |
| Economically inactive                 | 634                   | 73.2 | 70.1 - 76.1 | 232  | 26.8 | 24.0 - 29.9 | 1.01                       | 0.896  | 0.81 - 1.27 |
| Retired                               | 1,021                 | 90.9 | 89.1 - 92.5 | 102  | 9.1  | 7.5 - 10.9  | 0.54                       | <0.001 | 0.38 - 0.78 |
| <b>AUDIT<sup>†</sup></b>              |                       |      |             |      |      |             |                            |        |             |
| Not hazardous/harmful drinking        | 3,463                 | 82.7 | 81.4 - 84.0 | 723  | 17.3 | 16.0 - 18.6 | Reference                  |        |             |
| Hazardous/harmful drinking            | 419                   | 62.1 | 57.9 - 66.1 | 256  | 37.9 | 33.9 - 42.1 | 2.06                       | <0.001 | 1.66 - 2.56 |

Weighted N = 4,874 (bivariate analyses) and 4,698 (multivariate analysis). Bivariate totals that are 4,875 not 4,874 are due to rounding as the analyses use weighted data.

AOR: adjusted odds ratio.

<sup>†</sup>test of bivariate independence indicates significant difference ( $p < 0.05$ ).

<sup>‡</sup>AB is higher managerial, administrative and professional and Intermediate managerial, administrative and professional; C1 is supervisory, clerical and junior managerial, administrative and professional; C2 is skilled manual workers; D is semi-skilled and unskilled manual workers; and E is state pensioners, casual and lowest grade workers, unemployed with state benefits only.

## Aggressive harm

In bivariate analyses, men were marginally more likely to experience an aggressive harm than women (5.3% and 4.0% respectively,  $p = 0.04$ , Table 3). The other characteristics associated with experiencing aggressive harms were similar to experiencing any harm, with a higher prevalence of aggressive harm associated with being younger, disabled, single, non-retired, White British, renting accommodation and being a hazardous/harmful drinker.

1 Controlling for other variables in the model, sex and stage of life were not associated with  
2 experiencing an aggressive harm (Table 3). Age remained associated with harm after  
3 adjustment for other variables; those aged 45 and over were significantly less likely to  
4 experience an aggressive harm than those aged 16-24. Disability was also a strong risk  
5 factor for experience of aggressive harm; the odds of experiencing aggressive harm for  
6 non-disabled people was just over a third of the odds for disabled people (adjusted  
7 OR=0.37, 95% CI 0.24-0.59). Housing tenure was a relatively strong risk factor, with the  
8 odds of experiencing an aggressive harm for renters around double the odds of those who  
9 are home owners. This was also the case for hazardous/harmful drinkers, with an adjusted  
10 odds ratio of 2.35 (95% CI 1.63-3.40) relative to those who were not hazardous/harmful  
11 drinkers. Being White British compared to being in the other White, Black or Asian ethnic  
12 groups was also associated with increased risk of experiencing an aggressive harm.  
13 Differences in the risk of experiencing aggressive harm, between people with different  
14 educational attainment were minimal; the only significant difference being the greater risk  
15 for those with a degree/higher degree relative to those with no qualifications. The odds of  
16 experiencing an aggressive harm for those that were retired remained significantly lower  
17 than the odds of an aggressive harm for those that were employed (AOR 0.33, 95% CI  
18 0.13-0.83).  
19  
20  
21  
22  
23  
24  
25  
26  
27  
28  
29  
30  
31  
32  
33  
34  
35  
36  
37  
38  
39  
40  
41  
42  
43  
44  
45  
46  
47  
48  
49  
50  
51  
52  
53  
54  
55  
56  
57  
58  
59  
60



Table 3: Bivariate and multivariate comparisons of aggressive harm versus no aggressive harm from another's drinking in past 12 months, weighted data

| Independent variable                  | Bivariate comparisons |      |             |                 |      |            | Multivariate comparisons   |        |             |
|---------------------------------------|-----------------------|------|-------------|-----------------|------|------------|----------------------------|--------|-------------|
|                                       | No aggressive harm    |      |             | Aggressive harm |      |            | AOR                        | p      | 95% CI      |
|                                       | N                     | %    | 95% CI      | N               | %    | 95% CI     |                            |        |             |
| <b>Sex<sup>†</sup></b>                |                       |      |             |                 |      |            |                            |        |             |
| Male                                  | 2,242                 | 94.7 | 93.5 - 95.6 | 127             | 5.3  | 4.4 - 6.5  | Reference                  |        |             |
| Female                                | 2,407                 | 96.1 | 95.1 - 96.8 | 99              | 4.0  | 3.2 - 4.9  | 0.74                       | 0.086  | 0.53 - 1.04 |
| <b>Age band<sup>†</sup></b>           |                       |      |             |                 |      |            |                            |        |             |
| 16-24                                 | 646                   | 91.7 | 89.1 - 93.6 | 59              | 8.4  | 6.4 - 10.9 | Reference                  |        |             |
| 25-44                                 | 1,539                 | 94.4 | 92.9 - 95.6 | 91              | 5.6  | 4.4 - 7.1  | 0.84                       | 0.510  | 0.49 - 1.43 |
| 45-64                                 | 1,454                 | 95.8 | 94.4 - 96.9 | 64              | 4.2  | 3.1 - 5.6  | 0.43                       | 0.024  | 0.20 - 0.89 |
| 65+                                   | 1,010                 | 98.8 | 98.0 - 99.3 | 12              | 1.2  | 0.7 - 2.0  | 0.29                       | 0.044  | 0.09 - 0.97 |
| <b>Broad ethnic group<sup>†</sup></b> |                       |      |             |                 |      |            |                            |        |             |
| White British                         | 3,605                 | 94.8 | 93.8 - 95.5 | 200             | 5.3  | 4.5 - 6.2  | Reference                  |        |             |
| Other White groups                    | 384                   | 97.7 | 95.6 - 98.8 | 9               | 2.3  | 1.2 - 4.4  | 0.30                       | 0.002  | 0.14 - 0.64 |
| Black groups                          | 176                   | 97.6 | 95.1 - 98.8 | 4               | 2.4  | 1.2 - 4.9  | 0.37                       | 0.020  | 0.16 - 0.86 |
| Asian groups                          | 411                   | 97.5 | 95.4 - 98.7 | 11              | 2.5  | 1.4 - 4.7  | 0.43                       | 0.023  | 0.21 - 0.89 |
| Other groups                          | 52                    | 97.5 | 88.7 - 99.5 | 1               | 2.5  | 0.5 - 11.3 | 0.36                       | 0.217  | 0.07 - 1.83 |
| <b>Life stage<sup>†</sup></b>         |                       |      |             |                 |      |            |                            |        |             |
| Single                                | 629                   | 91.5 | 88.9 - 93.6 | 58              | 8.5  | 6.4 - 11.1 | Reference                  |        |             |
| Pre-family                            | 286                   | 92.9 | 88.2 - 95.9 | 22              | 7.1  | 4.2 - 11.8 | 1.23                       | 0.573  | 0.60 - 2.50 |
| Family                                | 1,519                 | 95.9 | 94.7 - 96.9 | 65              | 4.1  | 3.1 - 5.3  | 0.89                       | 0.684  | 0.52 - 1.55 |
| Post family                           | 2,213                 | 96.5 | 95.5 - 97.3 | 81              | 3.5  | 2.7 - 4.6  | 1.80                       | 0.097  | 0.90 - 3.60 |
| <b>Education<sup>†</sup></b>          |                       |      |             |                 |      |            |                            |        |             |
| No qualifications                     | 739                   | 97.5 | 96.0 - 98.4 | 19              | 2.6  | 1.6 - 4.0  | Reference                  |        |             |
| GCSE/O-level/CSE                      | 911                   | 94.6 | 92.6 - 96.1 | 52              | 5.4  | 3.9 - 7.4  | 1.75                       | 0.069  | 0.96 - 3.21 |
| A-level/vocational                    | 1242                  | 93.6 | 91.9 - 94.9 | 86              | 6.5  | 5.1 - 8.1  | 1.69                       | 0.077  | 0.95 - 3.01 |
| Degree/higher degree                  | 1396                  | 95.8 | 94.3 - 96.9 | 62              | 4.2  | 3.1 - 5.7  | 1.94                       | 0.042  | 1.02 - 3.69 |
| Other/still studying                  | 337                   | 97.9 | 95.8 - 99.0 | 7               | 2.1  | 1.0 - 4.2  | 0.88                       | 0.788  | 0.36 - 2.16 |
| <b>Social grade<sup>‡</sup></b>       |                       |      |             |                 |      |            |                            |        |             |
| AB                                    | 1,265                 | 95.9 | 94.2 - 97.1 | 54              | 4.1  | 2.9 - 5.8  | Not entered into the model |        |             |
| C1                                    | 1,267                 | 95.8 | 94.6 - 96.8 | 55              | 4.2  | 3.2 - 5.4  |                            |        |             |
| C2                                    | 1,016                 | 94.6 | 92.5 - 96.0 | 59              | 5.5  | 4.0 - 7.5  |                            |        |             |
| D                                     | 718                   | 96.4 | 94.5 - 97.6 | 27              | 3.6  | 2.4 - 5.5  |                            |        |             |
| E                                     | 382                   | 92.6 | 89.8 - 94.7 | 30              | 7.4  | 5.3 - 10.2 |                            |        |             |
| <b>Tenure<sup>†</sup></b>             |                       |      |             |                 |      |            |                            |        |             |
| Owned outright                        | 1,648                 | 97.7 | 96.7 - 98.3 | 40              | 2.4  | 1.7 - 3.3  | Reference                  |        |             |
| Bought on a mortgage                  | 1,386                 | 96.0 | 94.5 - 97.2 | 57              | 4.0  | 2.8 - 5.5  | 1.03                       | 0.918  | 0.57 - 1.88 |
| Rented from local authority           | 405                   | 93.5 | 90.4 - 95.6 | 28              | 6.5  | 4.4 - 9.6  | 2.58                       | 0.006  | 1.31 - 5.09 |
| Rented from private landlord          | 885                   | 91.5 | 89.3 - 93.3 | 82              | 8.5  | 6.7 - 10.7 | 2.33                       | 0.003  | 1.34 - 4.05 |
| Other                                 | 287                   | 94.0 | 91.0 - 96.0 | 18              | 6.0  | 4.0 - 9.0  | 2.04                       | 0.039  | 1.04 - 4.02 |
| <b>Disability<sup>†</sup></b>         |                       |      |             |                 |      |            |                            |        |             |
| Considers self disabled               | 477                   | 91.4 | 88.4 - 93.7 | 45              | 8.6  | 6.3 - 11.7 | Reference                  |        |             |
| Not disabled                          | 4,086                 | 95.8 | 95.1 - 96.5 | 178             | 4.2  | 3.5 - 4.9  | 0.37                       | <0.001 | 0.24 - 0.59 |
| <b>Employment status<sup>†</sup></b>  |                       |      |             |                 |      |            |                            |        |             |
| Employed                              | 2,535                 | 95.0 | 93.8 - 95.9 | 135             | 5.0  | 4.1 - 6.2  | Reference                  |        |             |
| Unemployed                            | 204                   | 95.0 | 91.3 - 97.2 | 11              | 5.0  | 2.8 - 8.7  | 0.62                       | 0.166  | 0.32 - 1.22 |
| Economically inactive                 | 799                   | 92.2 | 90.2 - 93.9 | 67              | 7.8  | 6.1 - 9.8  | 1.10                       | 0.654  | 0.73 - 1.66 |
| Retired                               | 1,110                 | 98.9 | 98.1 - 99.3 | 13              | 1.1  | 0.7 - 1.9  | 0.33                       | 0.018  | 0.13 - 0.83 |
| <b>AUDIT<sup>†</sup></b>              |                       |      |             |                 |      |            |                            |        |             |
| Not hazardous/harmful drinking        | 4,038                 | 96.5 | 95.7 - 97.1 | 149             | 3.6  | 2.9 - 4.3  | Reference                  |        |             |
| Hazardous/harmful drinking            | 599                   | 88.7 | 85.6 - 91.2 | 76              | 11.3 | 8.8 - 14.4 | 2.35                       | <0.001 | 1.63 - 3.40 |

Weighted N = 4,874 (bivariate analyses) and 4,698 (multivariate analysis). Bivariate totals that are 4,875 not 4,874 are due to rounding as the analyses use weighted data.

AOR: adjusted odds ratio.

<sup>†</sup>test of bivariate independence indicates significant difference (p<0.05).

<sup>‡</sup>AB is higher managerial, administrative and professional and Intermediate managerial, administrative and professional; C1 is supervisory, clerical and junior managerial, administrative and professional; C2 is skilled manual workers; D is semi-skilled and unskilled manual workers; and E is state pensioners, casual and lowest grade workers, unemployed with state benefits only.

## Perpetrators of harm

The most frequently reported perpetrators of harms were friends (23.4% of total perpetrator reports) and strangers (22.9%), while work colleagues were the least reported perpetrators (3.7%, Figure 1). The perpetrator varied according to the type of harm (Supplementary Table 3). Focussing on the most common harms experienced, being kept awake due to noise or disruption was predominantly perpetrated by strangers (49.5%, 95% CI 43.8%-55.3%), while both strangers and friends were the most common cause of feeling uncomfortable or anxious at a social occasion (strangers 34.4%, 95% CI 28.5%-40.7%;

1 friends 32.8%, 95 CI 27.2%-39.0%). Serious arguments that did not include physical  
2 violence were predominantly perpetrated by friends (35.7%, 95% CI 29.5%-42.6%) or  
3 someone the respondent was in a relationship with and lived with (23.1%, 95% CI 17.6%-  
4 29.6%). Likewise, being let down by someone or being emotionally hurt or neglected were  
5 harm types perpetrated by people close to respondents.  
6

7  
8 Strangers were most likely to be the perpetrators of two of the aggressive harms: 60.5%  
9 (95% CI 51.2%-69.1%) of respondents reporting feeling physically threatened by a  
10 stranger and 31.5% (95% CI 21.5%-43.6%) of respondents reporting being physically hurt  
11 by a stranger. While 19.0% (95% CI 6.5%-44.2%) of respondents reported being forced or  
12 pressured into sex or something sexual by a stranger, the most commonly reported  
13 perpetrator for this sexual aggressive harm was someone the respondent was in a  
14 relationship with and lived with (23.3%, 95% CI 9.8%-46.0%; rising to 39.9% when also  
15 including people in a relationship who lived elsewhere).  
16  
17

18  
19 Insert Figure 1 here.  
20

21 Breaking perpetrator type down further by sex reveals significant differences (data not  
22 reported). Focusing on aggressive harms only, of those who had experienced an  
23 aggressive harm, women were more likely than men to report the perpetrator being  
24 someone they were in a relationship with and lived with. This is true for feeling physically  
25 threatened (21.2% vs 4.1%,  $p<0.001$ ), being physically hurt (37.8% vs 6.3%,  $p<0.001$ ) and  
26 being forced or pressured into sex or something sexual (though not with statistical  
27 significance due to small numbers of people reporting this type of harm, 34.3% vs 0.0%,  
28  $p=0.077$ ). In contrast, of those who had experienced an aggressive harm men were more  
29 likely than women to report feeling physically threatened by a stranger (71.4% vs 46.1%,  
30  $p=0.008$ ) and being physically hurt by stranger (42.2% vs 18.0%,  $p=0.036$ ).  
31  
32  
33

### 34 **Frequency of harm**

35 Figure 2 reports information on the frequency with which harms were experienced. The  
36 majority of reported harms were experienced less than once a month (74.8%); 12.8%  
37 experienced harm at least monthly but less than weekly, 7.2% experienced weekly but less  
38 than daily, and 5.2% experienced daily or almost daily.  
39  
40  
41

42 Insert Figure 2 here.  
43  
44

45 The frequency of harm varied by harm type (Supplementary Table 4). The harm types  
46 reported to reoccur most often were those whose description implies that the harm occurs  
47 over a prolonged period of time with someone whom the respondent was in regular  
48 contact. These included 'had to spend my personal time caring for a person with a long  
49 term health condition or disability that resulted from their current or previous drinking'  
50 (19.4% daily or almost daily, 95% CI 10.2%-33.8%) and 'had to stop seeing or being in  
51 contact with someone because of their drinking' (19.3% daily or almost daily, 95% CI  
52 11.9%-29.6%). It was less common for other harms to be experienced at a daily or almost  
53 daily frequency. Nevertheless, all harm types had at least one respondent reporting daily  
54 or almost daily frequency of harm.  
55  
56  
57  
58  
59  
60

## DISCUSSION

1  
2 In this exploratory study one in five respondents experienced AHTO in the previous 12 months.  
3 The most commonly reported AHTO were being kept awake due to noise or disruption and feeling  
4 uncomfortable or anxious at a social occasion, which have been identified as the most prevalent  
5 harms in other studies.<sup>4 5</sup> More concerning, 4.6% reported experiencing an aggressive harm.  
6 Experiencing AHTO was associated with a number of demographic and socio-economic variables.  
7 Friends and strangers were the dominant perpetrators of AHTO. Most harms occurred less than  
8 monthly but some respondents experienced harm daily or almost daily.  
9

10  
11 The main strength of this study is its large sample size; this is the largest survey on AHTO to have  
12 been conducted in the United Kingdom and the first to provide data for England. The sampling and  
13 weighting strategy were employed to ensure the sample was representative of the English  
14 population and thus the generalisability of the findings. There are a number of limitations to note.  
15 Recall is always a problem with surveys; harms that occurred a year ago or had little impact on the  
16 respondent may be more difficult to recall. Attributing causality is not possible using a cross  
17 sectional design. There are also some social groups that are systematically missing from surveys  
18 such as homeless people, those in hospital or care homes and those who are incarcerated;  
19 populations whose alcohol use is likely different.<sup>13</sup> Previous studies on AHTO have also largely  
20 relied on cross-sectional surveys and are affected by the same limitations. A response rate could  
21 not be calculated because Ipsos Mori did not collect the necessary data. While the total amount of  
22 missing data is small, any missing data can potentially introduce bias. There were some significant  
23 differences in the characteristics of those that answered the AHTO questions and those that did  
24 not. The internal validity of the AHTO questions used here has not been measured; in the initial  
25 search of the literature the authors failed to identify a validated survey. Consequently it is possible  
26 that discrepancies exist between the responses provided by participants and their actual  
27 experience of alcohol-related harm. Finally, ecological fallacy, where the inferences about  
28 individuals are made based upon data for a group, is also a consideration in this type of study. It  
29 is likely that systematic differences exist in harm by population sub-groups (for example by sex and  
30 ethnicity) and future work on AHTO in the UK should explore this.  
31  
32

33  
34 In this study the prevalence of harm was 20.1%. The closest comparison is from a cross-sectional  
35 survey conducted in Wales in 2015 which used identical AHTO questions and reported the  
36 prevalence of any harm in the previous 12 months to be 59.7%.<sup>14</sup> There is some evidence from  
37 routine data to support a lower prevalence of harm in England than Wales. For example, the  
38 percentage of violent incidents where the victim believed the offender(s) to be under the influence  
39 of alcohol tends to be higher in Wales than England<sup>15</sup> although not conclusively so. However, the  
40 magnitude of the difference in the reported prevalence of harm between England and Wales  
41 seems questionable, given the similarities between the two nations. This difference could be due,  
42 in part, to differences in methodology and caution needs to be applied in drawing direct  
43 comparisons. In England the harm questions were asked after the ATS questions; this may have  
44 affected how people perceived harm, and therefore how they responded to the harm questions. It  
45 is also possible that respondents were experiencing fatigue by the end of the survey and this may  
46 have affected how fully they reported their experiences of harm. The English survey was  
47 administered face-to-face while the survey in Wales was administered via the telephone using  
48 landline numbers. Using data from the USA, researchers comparing face-to-face and telephone  
49 interviews reported that telephone surveys may miss certain sections of the population if they  
50 solely rely on landlines, including those with lower incomes.<sup>16</sup> However the Welsh survey was  
51 weighted so the data were representative of the deprivation of the general population.<sup>14</sup> Other  
52 surveys of AHTO conducted in the United Kingdom have reported the prevalence of harm in adults  
53 to be 46.3%<sup>5</sup> and 51%<sup>17</sup> in Scotland and 79% in the North West of England,<sup>17</sup> however these  
54 studies used very different AHTO questions so the results are not comparable. Despite the  
55 difference in prevalence between the Welsh survey and the current study, the relative prevalence  
56  
57  
58  
59  
60

of the types of harm were similar; being kept awake at night, feeling uncomfortable or anxious at a social occasion and having a serious argument were the most prevalent harms in both surveys.

Being a hazardous/harmful drinker increased the odds of experiencing AHTO. This is perhaps unsurprising given that drinking with other drinkers and in places where alcohol is consumed increases one's exposure to drinkers. However the association with drinking and experiencing alcohol-harm is not conclusive. A cross-sectional comparison of harm from 'heavy drinking' friends and family across five Nordic countries and Scotland reported that drinking frequency was not significantly related to experiencing harm from others but binge drinking frequency was. A higher frequency of binge drinking increased the risk of experiencing AHTO in Sweden and Norway and there was some evidence for this relationship in Finland also, but not in the other countries.<sup>7</sup> A paper using the same Norwegian data showed that the association between experiencing harm and one's own drinking was not evident for all types of harm.<sup>6</sup> Another cross-sectional survey showed a dose response relationship between how much a person drinks and experiencing AHTO, with dependent drinkers having the greatest risk.<sup>4</sup>

Here, age was also associated with experiencing any harm and aggressive harm. A number of studies from a range of countries have reported that being of younger age increases the risk of being harmed from another's drinking.<sup>4-7 18</sup> However, 'younger age' in this context does not always mean 'young'; one study, for example, concluded that those aged 59 or less had a higher risk of being negatively affected by a known drinker than those aged 60 and over.<sup>7</sup> A global survey of 63,725 respondents aged 18-34 years reported that those aged 18-24 years were significantly more likely to experience an aggressive AHTO than those aged 30-34 or 25-29;<sup>4</sup> similar to results reported here.

The respondent's sex was not a significant risk factor for experiencing harm. The literature is mixed regarding sex as a risk factor. Women were reported to be significantly more likely to experience harm than men in Finland and Sweden but not in Denmark, Iceland, Norway or Scotland.<sup>5 6</sup> Being a woman was found to be a significant risk factor for all harms and aggressive harms using data from the Global Drug Survey.<sup>4</sup> Women have also been identified as being at higher risk of harm in the USA.<sup>19</sup> The association of sex and experiencing harm is different for different types of harm. For example women are significantly more likely than men to experience unwanted sexual attention/sexual harassment or assault<sup>4 6</sup> whereas men are more likely to have clothing, property or other belongings damaged.<sup>4 6</sup> While examining differences in harm by sex was not the focus of this study, Supplementary Table 2 shows that such differences may exist and should be considered in future work on this topic in the United Kingdom.

Few studies have considered whether ethnic background is a risk factor for experiencing harm. Data from the USA demonstrate that the link between ethnicity and experience of harm is not conclusive.<sup>18 19</sup> Here, being White British was significantly associated with experiencing harm and also aggressive harm. Most minority ethnic groups in United Kingdom have higher rates of abstinence from alcohol and lower levels of drinking than people of white ethnicity.<sup>20</sup> However the results of the multivariate modelling presented in this study show that White British ethnicity is associated with experiencing harm and aggressive harm independently of AUDIT score.

Measures such as educational attainment, type of accommodation, social grade and employment status are proxy measures for socio-economic status. Literature on the effect of socio-economic status is mixed and comparisons are hindered by the multitude of different measures used. Here findings show that experiencing harm was significantly associated with having qualifications (compared to having none) with the highest risk being for those with a degree or higher degree. It is difficult to compare these results to the literature because of differences in the ways education is measured. Data from a Danish national survey showed no clear association between experiencing harm and education level with education categorised as low (completion up to year 11), middle

(high school/technical college) and high (college or university).<sup>21</sup> Data from the Global Drug Survey showed no association between education and experience of harm or aggressive harm but there was an association between education and experiencing particular types of harm.<sup>4</sup> In this study social grade was not significantly associated with harm or aggressive harm in the bivariate analyses.

The current study shows that being retired lowers the odds of experiencing harm and aggressive harm compared to all other employment statuses. This association was independent of age. The risk of being harmed did not differ significantly between those who were employed and not employed. Data from two surveys conducted in the USA show that those who were unemployed were significantly more likely to experience AHTO than those who were employed.<sup>18 19</sup> Data from Denmark show that employment might be significantly associated with experiencing harm but no conclusive results were provided and the wide confidence intervals show that estimates lacked precision.<sup>21</sup>

Here, compared to those that owned their home outright, those who rented from a private landlord were significantly more likely to experience harm and those who rented from the local authority or rented from a private landlord were significantly more likely to experience an aggressive harm. No previous studies on the association between type of accommodation tenure and experiencing harm were identified. It is possible that those who rent represent a more transitory and vulnerable population which increases their risk of harm. While it is premature to advocate a policy response to this exploratory data, an investigation of the applicability of smoke-free housing policies might be of relevance here. Having a disability was also significantly associated with experiencing any harm and an aggressive harm. No previous studies on the association between having a disability and experiencing harm were identified, although there is good evidence to suggest that adults with a disability are at a higher risk of experiencing violence in general.<sup>22</sup> In combination these findings suggest that vulnerable people may be more likely to experience AHTO. Being in the family stage of life also lowered the odds of experiencing harm compared to being single. This is perhaps surprising given that the survey included questions which specifically asked about harms most likely caused by a family member. Evidence on the effect of relationships and household types is mixed and largely dependent on the way these are categorised and so cannot be directly compared.

This study identified friends and strangers as the dominant perpetrators making up around 46% of all reports, though the perpetrator varied depending on type of harm. For example, family members made up a larger proportion of perpetrators of harms such as stopping seeing someone or having to care for someone because of their drinking. While differences by sex were not the focus of this paper, and were not investigated in detail, investigating perpetrator type by sex for aggressive harms revealed significant differences (data not reported). Women were more likely to be physically hurt and forced or pressured into something sexual by someone they were in a relationship with. In contrast, for men, strangers were the most likely perpetrators of being hurt physically and feeling threatened. These findings are in line with data from England and Wales on the relationship between offender and perpetrator,<sup>23</sup> and from previous research. A study in the US using the 2010 National Alcohol Survey reported that men were more likely to be assaulted in bar fights by strangers while women were more likely to be (sexually) assaulted by other drinkers (partners or acquaintances) within a more private setting.<sup>24</sup> The context within which drinking occurs is therefore relevant in relation to exploring differences in AHTO by sex.

While three quarters of harms were experienced less than monthly, 5.2% were experienced daily or almost daily indicating a considerable burden for of alcohol-related harm for a section of the population. The frequency of experiencing harm was largely dependent on the type of harm. Harms with the highest frequency of daily/almost daily reports were those which occurred over a prolonged period of time and/or implied frequent contact with the perpetrator such as caring for

1 someone with a long-term health condition or disability that results from them drinking. Data from  
2 two surveys suggest that exposure to heavy drinkers is associated with poorer health, wellbeing  
3 and quality of life.<sup>25 26</sup>

4 To conclude, this is the largest ever survey of AHTO conducted within the United Kingdom and the  
5 first national study in England. It is clear that AHTO is relatively prevalent and that some  
6 individuals experience harm frequently. The most prevalent harms could be considered  
7 insignificant but even apparently minor harms such as sleep disruption can have an impact on  
8 health and quality of life,<sup>27</sup> particularly if experienced persistently. It is difficult to compare results  
9 with the literature because of the diversity of methods being employed. In order to support  
10 temporal and geographic comparisons it would be advantageous for studies to use a consistent  
11 methodology including the sampling and data collection methods, in addition to the harm  
12 questions. The WHO ThaiHealth project has designed a survey to measure AHTO in order to  
13 facilitate international comparison<sup>28 29</sup> but unfortunately authors were not aware of this when they  
14 began this current study. While lengthy, using this would be a good way to develop a  
15 comprehensive and consistent evidence base. However it is clear that there are differences across  
16 harm types and more detailed analysis of specific harms would be valuable for supporting  
17 remedial action from policymakers. Here we consider 'aggressive harms' as a distinctive group of  
18 harms; future research could consider other harm groupings in order to provide a more detailed  
19 assessment of specific harm types. Research on the types of alcohol consumption patterns that  
20 increase the likelihood of experiencing AHTO in the United Kingdom would be valuable.  
21 Understanding what puts younger adults at increased risk could be a useful focus for future  
22 research as it might identify the contextual factors which make experiencing harm more likely.  
23 Further focus on the differences in harm by sex would also be advantageous as there is little data  
24 on this in relation to the United Kingdom. Policy to address AHTO is less well developed than  
25 policy that seeks to address harms to the drinker; exceptions include crime and violence and harm  
26 to the unborn foetus which have been included in previous Government's Alcohol Strategy.<sup>30</sup>  
27 Given that AHTO research is in its early stages it is premature to advocate a detailed policy  
28 response but results presented here will be of interest to policy makers to help understand the  
29 wider impact of other people's drinking.  
30  
31  
32  
33

## 34 **ACKNOWLEDGEMENTS**

35  
36  
37 The authors would like to thank the alcohol expert forum of the five nations Public Health  
38 Peer Network for initiating this work and to PHE for funding it. Thanks also to the following  
39 people in PHE: Craig Timpson for quality assuring the analyses, Helen Outhwaite for help  
40 with searching for literature, Robyn Burton and Helen Willey for their input into early  
41 conversations about methods. Thanks to Dr Jamie Brown, University College London, for  
42 permitting the harm to others questions to be appended to the alcohol toolkit survey and  
43 for his subsequent support with interpretation of the alcohol toolkit survey questions.  
44 Thanks to Ipsos MORI for delivering the survey, in particular Stuart Smedley. Finally,  
45 thanks for the four reviewers for their comments on the first draft of this paper.  
46  
47  
48  
49

## 50 **COMPETING INTERESTS**

51  
52 None declared.  
53  
54

## 55 **FUNDING**

The work was funded by Public Health England.

### **AUTHORS' CONTRIBUTIONS**

CB provided day to day management of the study, helped design the questionnaire and wrote the first draft. DB did the analysis and helped to write the first draft. JM undertook a review of the literature. KS was involved with the initiation, helped design the questionnaire and provided statistical support. CP was involved with the initiation of the study. CH was involved with the initiation of the study and helped design the questionnaire. All authors reviewed and helped to revise successive drafts and approved the final version of the manuscript.

### **DATA SHARING AGREEMENT**

Sharing of data will be considered by PHE and UCL on a case-by-case basis. Please contact the lead author for further details.

or peer review only

## REFERENCES

1. World Health Organization. Global status report on alcohol and health. Geneva: World Health Organization, 2014.
2. World Health Organization. Global strategy to reduce the harmful use of alcohol. Geneva: World Health Organization, 2010.
3. Office for National Statistics. Chapter 5: Violent crime and sexual offences - alcohol-related violence. London: Office for National Statistics, 2015.
4. Bellis M, Quigg Z, Hughes K, et al. Harm from other people's drinking: an international survey of their occurrence, impacts on feeling safe and legislation relating to their control. *BMJ Open* 2015;5
5. Moan I, Storvoll E, Sundin E, et al. Experienced harm from other people's drinking: a comparison of Northern European countries. *Substance Abuse Research and Treatment* 2015;9(S(2)):45-57.
6. Storvoll E, Moan I, Lund I. Negative consequences of other people's drinking: prevalence, perpetrators and locations. *Drug and Alcohol Review* 2016;2016
7. Ramstedt M, Sundin E, Moan I, et al. Harm experienced from the heavy drinking of family and friends in the general population: A comparative study of six northern European countries. *Substance Abuse Research and Treatment* 2015;9(S2)
8. Burton R, Henn C, Lavoie D, et al. A rapid evidence review of the effectiveness and cost-effectiveness of alcohol policies: an English perspective. *The Lancet* 2016 doi: [http://dx.doi.org/10.1016/S0140-6736\(16\)32420-5](http://dx.doi.org/10.1016/S0140-6736(16)32420-5)
9. Beard E, Brown J, West R, et al. Protocol for a national monthly survey of alcohol use in England with 6-month follow up: 'The Alcohol Toolkit Survey'. *BMC Public Health* 2015;15:230.
10. Barbor T, Higgins-Biddle J, Saunders J, et al. AUDIT: The alcohol use disorders identification test, guidelines for use in primary care. 2nd edition. Geneva: World Health Organization, 2001.
11. StataCorp. Stata survey data reference manual: release 13. Texas: StataCorp LP, 2013.
12. Rao J, Scott A. On chi-squared tests for multiway contingency tables with cell proportions estimated from survey data. *Annals of Statistics* 1981;12:46-60.
13. Johnson T. Sources of error in substance use prevalence surveys. *International Scholarly Research Notices* 2014;2014 doi: <http://dx.doi.org/10.1155/2014/923290>
14. Quigg Z, Bellis AM, Grey H, et al. Alcohol's harms to others: the harms from other people's alcohol consumption in Wales. Cardiff: Public Health Wales, 2016.
15. Office for National Statistics. Estimates of violent incidents where the victim believed the offender(s) to be under the influence of alcohol or drugs in England and Wales, year ending March 2006 to year ending March 2016 Crime Survey for England and Wales, 2017.
16. Greenfield T, Midanik L, Rogers J. Effects of telephone versus face-to-face interview models on reports of alcohol consumption. *Addiction* 2000;95(2):277-84.
17. Gell L, Ally A, Buykx P, et al. Alcohol's harm to others. Sheffield: The University of Sheffield, 2015.
18. Karriker-Jaffe K, Greenfield T. Gender differences in associations of neighbourhood disadvantage with alcohol's harms to others: a cross-sectional study from the United States. *Drug and Alcohol Review* 2014;33(3):296-303.
19. Greenfield T, Karriker-Jaffe K, Kaplan L, et al. Trends in alcohol's harms to others (AHTO) and co-occurrence of family-related AHTO: the four US National Alcohol Surveys, 2000-2015. *Substance Abuse Research and Treatment* 2015;2015(9(S2)):23-31.
20. Hurcombe R, Bayley M, Goodman A. Ethnicity and alcohol: a review of the UK literature. York: Joseph Rowntree Foundation, 2010.
21. Seid A, Grittner U, Greenfield T, et al. To cause harm and to be harmed by others: new perspectives on alcohol's harm to others. *Substance Abuse Research and Treatment* 2015;2015(S2):13-22.



- 1 22. Hughes K, Bellis AM, Jones L, et al. Prevalence and risk of violence against adults with  
2 disabilities: a systematic review and meta-analysis of observational studies. *The Lancet*  
3 2012;379(9826):1621-29.
- 4 23. Office for National Statistics. Overview of violent crime and sexual offences. Newport: Office  
5 for National Statistics, 2016.
- 6 24. Kaplan L, Karriker-Jaffe J, Greenfield K. Drinking context and alcohol's harm from others  
7 among men and women in the US National Alcohol Survey. *Journal of Substance Use*  
8 2017;22(4):412-18.
- 9 25. Casswell S, You R, Huckle T. Alcohol's harm to others: reduced wellbeing and health status  
10 for those with heavy drinkers in their lives. *Addiction* 2011;106(6):1087-94.
- 11 26. Jiang H, Callinan S, Laslett A, et al. Correlates of caring for the drinkers and others among  
12 those harmed by another's drinking. *Drug and Alcohol Review* 2015;34:162-69.
- 13 27. Muzet A. Environmental noise, sleep and health. *Sleep medicine reviews* 2007;12(2):135-42.
- 14 28. World Health Organization/ThaiHealth International Collaboration Research Project. The Harm  
15 to Others from Drinking. Geneva: World Health Organization, 2012.
- 16 29. Callinan S, Laslett A, Rekve D, et al. Alcohol's harm to others: An international collaborative  
17 project. *International Journal of Alcohol and Drug Research* 2016;5(2):25-32.
- 18 30. HM Government. The Government's Alcohol Strategy. London: HM Government, 2012.

1  
2  
3 Figure Legends  
4

5 Figure 1: Perpetrators as a percentage of all reported harms to others  
6

7 Figure 2: Frequency of all reported harms to others  
8  
9  
10  
11  
12  
13  
14  
15  
16  
17  
18  
19  
20  
21  
22  
23  
24  
25  
26  
27  
28  
29  
30  
31  
32  
33  
34  
35  
36  
37  
38  
39  
40  
41  
42  
43  
44  
45  
46  
47  
48  
49  
50  
51  
52  
53  
54  
55  
56  
57  
58  
59  
60

For peer review only

1  
2  
3  
4  
5  
6  
7  
8  
9  
10  
11  
12  
13  
14  
15  
16  
17  
18  
19  
20  
21  
22  
23  
24  
25  
26  
27  
28  
29  
30  
31  
32  
33  
34  
35  
36  
37  
38  
39  
40  
41  
42  
43  
44  
45  
46  
47  
48  
49  
50  
51  
52  
53  
54  
55  
56  
57  
58  
59  
60

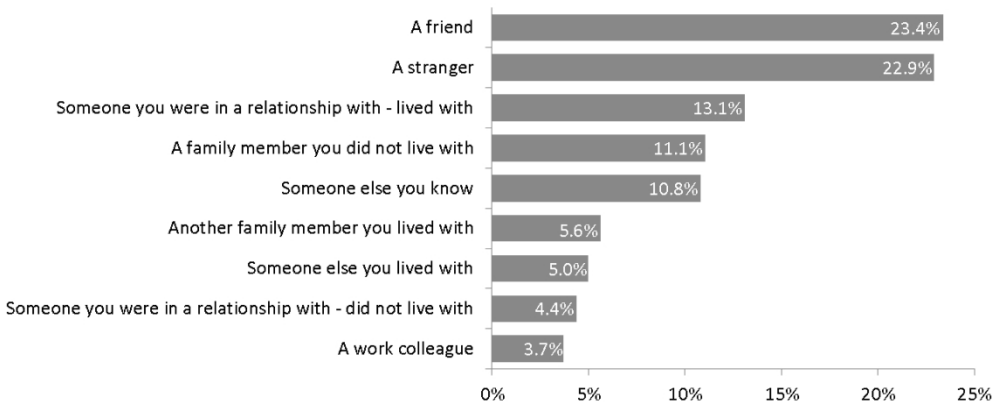

Figure 1: Perpetrators as a percentage of all reported harms to others

364x149mm (300 x 300 DPI)

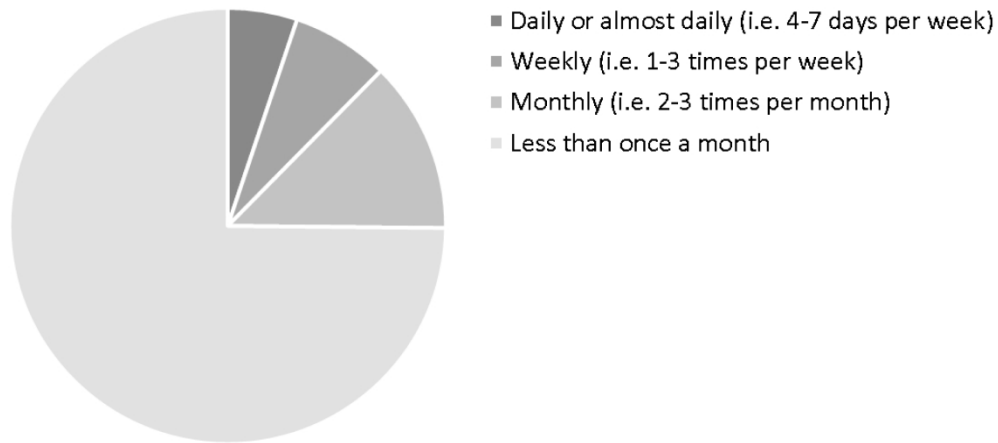

Figure 2: Frequency of all reported harms to others

292x132mm (300 x 300 DPI)

Supplementary Table 1: Examination of missing data, non-weighted data

| Independent variable                        | Included (AHTO questions answered) |      | Excluded (AHTO questions not answered) |     | p value |
|---------------------------------------------|------------------------------------|------|----------------------------------------|-----|---------|
|                                             | N                                  | %    | N                                      | %   |         |
| <i>Sex (N = 5,068)</i>                      |                                    |      |                                        |     |         |
| Female                                      | 2,397                              | 96.9 | 76                                     | 3.1 | 0.023   |
| Male                                        | 2,484                              | 95.7 | 111                                    | 4.3 |         |
| <i>Age band (N = 5,608)</i>                 |                                    |      |                                        |     |         |
| 16-24                                       | 789                                | 97.4 | 21                                     | 2.6 | 0.111   |
| 25-44                                       | 1,460                              | 96.3 | 56                                     | 3.7 |         |
| 45-64                                       | 1,435                              | 95.5 | 68                                     | 4.5 |         |
| 65+                                         | 1,197                              | 96.6 | 42                                     | 3.4 |         |
| <i>Broad ethnic group (N = 5,040)</i>       |                                    |      |                                        |     |         |
| White British                               | 3,603                              | 96.2 | 142                                    | 3.8 | 0.125   |
| Other White groups                          | 393                                | 98.3 | 7                                      | 1.8 |         |
| Black groups                                | 262                                | 95.6 | 12                                     | 4.4 |         |
| Asian groups                                | 539                                | 97.3 | 15                                     | 2.7 |         |
| Other groups                                | 63                                 | 94.0 | 4                                      | 6.0 |         |
| <i>Life stage (N = 5,067)</i>               |                                    |      |                                        |     |         |
| Single                                      | 716                                | 97.4 | 19                                     | 2.6 | 0.150   |
| Pre-family                                  | 260                                | 95.9 | 11                                     | 4.1 |         |
| Family                                      | 1,473                              | 96.7 | 50                                     | 3.3 |         |
| Post family                                 | 2,431                              | 95.8 | 107                                    | 4.2 |         |
| <i>Education (5,039)</i>                    |                                    |      |                                        |     |         |
| No qualifications                           | 866                                | 97.2 | 25                                     | 2.8 | 0.075   |
| GCSE/O-level/CSE                            | 952                                | 95.9 | 41                                     | 4.1 |         |
| A-level/vocational                          | 1,334                              | 97.2 | 39                                     | 2.8 |         |
| Degree/higher degree                        | 1,335                              | 95.4 | 64                                     | 4.6 |         |
| Other/still studying                        | 368                                | 96.1 | 15                                     | 3.9 |         |
| <i>Social grade<sup>†</sup> (N = 5,068)</i> |                                    |      |                                        |     |         |
| AB                                          | 1,081                              | 96.2 | 43                                     | 3.8 | 0.134   |
| C1                                          | 1,554                              | 95.8 | 68                                     | 4.2 |         |
| C2                                          | 947                                | 96.7 | 32                                     | 3.3 |         |
| D                                           | 757                                | 97.7 | 18                                     | 2.3 |         |
| E                                           | 542                                | 95.4 | 26                                     | 4.6 |         |
| <i>Tenure (N = 5,027)</i>                   |                                    |      |                                        |     |         |
| Owned outright                              | 1,729                              | 97.5 | 45                                     | 2.5 | <0.001  |
| Bought on a mortgage                        | 1,124                              | 95.4 | 54                                     | 4.6 |         |
| Rented from local authority                 | 568                                | 95.5 | 27                                     | 4.5 |         |
| Rented from private landlord                | 1,029                              | 97.0 | 32                                     | 3.0 |         |
| Other                                       | 392                                | 93.6 | 27                                     | 6.4 |         |
| <i>Disability (N = 4,956)</i>               |                                    |      |                                        |     |         |
| Considers self disabled                     | 571                                | 94.4 | 34                                     | 5.6 | 0.002   |
| Not disabled                                | 4,213                              | 96.8 | 138                                    | 3.2 |         |
| <i>Employment status (N = 5,066)</i>        |                                    |      |                                        |     |         |
| Employed                                    | 2,306                              | 95.9 | 98                                     | 4.1 | 0.121   |
| Unemployed                                  | 237                                | 98.8 | 3                                      | 1.3 |         |
| Economically inactive                       | 1,009                              | 96.1 | 41                                     | 3.9 |         |
| Retired                                     | 1,327                              | 96.7 | 45                                     | 3.3 |         |
| <i>AUDIT (N = 5,044)</i>                    |                                    |      |                                        |     |         |
| Not hazardous/harmful drinking              | 4,215                              | 96.7 | 142                                    | 3.3 | 0.003   |
| Hazardous/harmful drinking                  | 649                                | 94.5 | 38                                     | 5.5 |         |

N = 5,068 (totals for independent variables will not equal 5,068 where the person did not provide responses to the AHTO questions and the independent variable.

<sup>†</sup>AB is higher managerial, administrative and professional and Intermediate managerial, administrative and professional; C1 is supervisory, clerical and junior managerial, administrative and professional; C2 is skilled manual workers; D is semi-skilled and unskilled manual workers; and E is state pensioners, casual and lowest grade workers, unemployed with state benefits only.

Supplementary Table 2: Prevalence of harm in the previous 12 months by sex, weighted data

| Harm type                                                                                                                                               | Number of respondents who experienced harm |       | Percentage of respondents who experienced harm |                |
|---------------------------------------------------------------------------------------------------------------------------------------------------------|--------------------------------------------|-------|------------------------------------------------|----------------|
|                                                                                                                                                         | Men                                        | Women | Men (95% CI)                                   | Women (95% CI) |
| Been kept awake due to noise or disruption                                                                                                              | 177                                        | 213   | 7.5 (6.3-8.8)                                  | 8.5 (7.4-9.8)  |
| Felt uncomfortable or anxious at a social occasion (e.g. a party)                                                                                       | 160                                        | 171   | 6.8 (5.7-8.0)                                  | 6.8 (5.8-8.0)  |
| Had a serious argument that did NOT include physical violence                                                                                           | 129                                        | 147   | 5.4 (4.6-6.6)                                  | 5.8 (4.9-6.9)  |
| Been let down by someone due to them failing to do something that I was counting on them to do because of their drinking                                | 82                                         | 92    | 3.5 (2.7-4.4)                                  | 3.7 (3.0-4.6)  |
| Been emotionally hurt or neglected                                                                                                                      | 50                                         | 120   | 2.1 (1.6-2.9)                                  | 4.8 (3.9-5.8)  |
| Felt physically threatened                                                                                                                              | 95                                         | 69    | 4.0 (3.2-5.1)                                  | 2.7 (2.1-3.6)  |
| Had to stop seeing or being in contact with someone because of their drinking                                                                           | 47                                         | 73    | 2.0 (1.4-2.7)                                  | 2.9 (2.3-3.7)  |
| Had to contact the police                                                                                                                               | 56                                         | 62    | 2.4 (1.8-3.2)                                  | 2.5 (1.9-3.2)  |
| Had someone break or damage something that mattered to me                                                                                               | 52                                         | 43    | 2.2 (1.6-3.0)                                  | 1.7 (1.2-2.4)  |
| Been physically hurt due to them assaulting me or acting violently                                                                                      | 50                                         | 42    | 2.1 (1.5-2.9)                                  | 1.7 (1.2-2.3)  |
| Been put at risk in a car when someone was driving after drinking                                                                                       | 37                                         | 38    | 1.6 (1.1-2.3)                                  | 1.5 (1.1-2.1)  |
| Felt genuinely concerned that they may cause harm to my children or someone else's children                                                             | 18                                         | 43    | 0.7 (0.4-1.3)                                  | 1.7 (1.3-2.4)  |
| Had to spend my personal time caring for a person with a long term health condition or disability that resulted from their current or previous drinking | 24                                         | 33    | 1.0 (0.7-1.6)                                  | 1.3 (0.9-1.9)  |
| Been physically hurt due to them accidentally injuring me (e.g. by falling on me)                                                                       | 16                                         | 37    | 0.7 (0.4-1.2)                                  | 1.5 (1.0-2.1)  |
| Had money that would have improved the quality of my life spent on their alcohol-related purchases                                                      | 18                                         | 32    | 0.8 (0.5-1.2)                                  | 1.3 (0.9-1.9)  |
| Drank alcohol myself in order to cope with the problems caused by their drinking                                                                        | 19                                         | 14    | 0.8 (0.5-1.3)                                  | 0.5 (0.3-1.0)  |
| Felt forced or pressured into sex or something sexual                                                                                                   | 12                                         | 20    | 0.5 (0.3-0.9)                                  | 0.8 (0.5-1.3)  |
| Had to move out of my usual place of residence and stay somewhere else                                                                                  | 9                                          | 16    | 0.4 (0.2-0.8)                                  | 0.6 (0.4-1.1)  |

Weighted N = 4,874.

Supplementary Table 3: Perpetrator of harm by harm type (continued on the next page)

| Harm type                                                                                                                                               |     | Someone you were in a relationship with (e.g. wife/husband, partner) who you lived with |      |           | Someone you were in a relationship with (e.g. wife/husband, partner) who you did not live with |      |           | Another family member you lived with |      |           | A family member you did not live with |      |           |
|---------------------------------------------------------------------------------------------------------------------------------------------------------|-----|-----------------------------------------------------------------------------------------|------|-----------|------------------------------------------------------------------------------------------------|------|-----------|--------------------------------------|------|-----------|---------------------------------------|------|-----------|
|                                                                                                                                                         |     | n                                                                                       | %    | 95% CI    | n                                                                                              | %    | 95% CI    | n                                    | %    | 95% CI    | n                                     | %    | 95% CI    |
| Had a serious argument that did NOT include physical violence                                                                                           | No  | 199                                                                                     | 76.9 | 70.4-82.4 | 240                                                                                            | 92.7 | 89.0-95.2 | 240                                  | 92.7 | 88.6-95.3 | 216                                   | 83.5 | 77.7-88.0 |
|                                                                                                                                                         | Yes | 60                                                                                      | 23.1 | 17.6-29.6 | 19                                                                                             | 7.3  | 4.8-11.0  | 19                                   | 7.3  | 4.7-11.4  | 43                                    | 16.5 | 12.0-22.3 |
| Felt physically threatened                                                                                                                              | No  | 136                                                                                     | 88.5 | 82.2-92.8 | 149                                                                                            | 97.0 | 92.4-98.8 | 148                                  | 96.7 | 92.0-98.6 | 145                                   | 94.5 | 89.6-97.2 |
|                                                                                                                                                         | Yes | 18                                                                                      | 11.5 | 7.2-17.8  | 5                                                                                              | 3.0  | 1.2-7.6   | 5                                    | 3.3  | 1.4-8.0   | 8                                     | 5.5  | 2.8-10.5  |
| Been emotionally hurt or neglected                                                                                                                      | No  | 121                                                                                     | 76.1 | 67.7-82.9 | 137                                                                                            | 85.9 | 78.7-91.0 | 146                                  | 92.0 | 86.4-95.4 | 116                                   | 72.7 | 64.2-79.8 |
|                                                                                                                                                         | Yes | 38                                                                                      | 23.9 | 17.1-32.3 | 22                                                                                             | 14.1 | 9.1-21.3  | 13                                   | 8.0  | 4.6-13.6  | 43                                    | 27.3 | 20.2-35.8 |
| Been physically hurt due to them assaulting me or acting violently                                                                                      | No  | 66                                                                                      | 79.8 | 69.2-87.4 | 79                                                                                             | 95.0 | 86.3-98.3 | 76                                   | 90.8 | 80.5-95.9 | 73                                    | 88.1 | 76.8-94.3 |
|                                                                                                                                                         | Yes | 17                                                                                      | 20.2 | 12.6-30.8 | 4                                                                                              | 5.0  | 1.7-13.7  | 8                                    | 9.2  | 4.1-19.6  | 10                                    | 11.9 | 5.7-23.2  |
| Been physically hurt due to them accidentally injuring me (e.g. by falling on me)                                                                       | No  | 44                                                                                      | 87.2 | 74.1-94.2 | 47                                                                                             | 91.5 | 79.3-96.8 | 51                                   | 99.2 | 94.4-99.9 | 44                                    | 86.6 | 72.0-94.2 |
|                                                                                                                                                         | Yes | 7                                                                                       | 12.8 | 5.8-25.9  | 4                                                                                              | 8.5  | 3.2-20.7  | 0                                    | 0.8  | 0.1-5.6   | 7                                     | 13.4 | 5.8-28.0  |
| Been put at risk in a car when someone was driving after drinking                                                                                       | No  | 62                                                                                      | 89.5 | 78.5-95.2 | 65                                                                                             | 93.6 | 83.4-97.7 | 63                                   | 90.4 | 79.6-95.8 | 66                                    | 96.1 | 87.9-98.8 |
|                                                                                                                                                         | Yes | 7                                                                                       | 10.5 | 4.8-21.5  | 4                                                                                              | 6.4  | 2.3-16.6  | 7                                    | 9.6  | 4.2-20.4  | 3                                     | 4.0  | 1.2-12.1  |
| Felt forced or pressured into sex or something sexual                                                                                                   | No  | 21                                                                                      | 76.7 | 54.0-90.2 | 23                                                                                             | 83.4 | 61.0-94.2 | 26                                   | 95.4 | 70.5-99.4 | 26                                    | 95.8 | 72.8-99.5 |
|                                                                                                                                                         | Yes | 6                                                                                       | 23.3 | 9.8-46.0  | 5                                                                                              | 16.6 | 5.8-39.0  | 1                                    | 4.7  | 0.6-29.5  | 1                                     | 4.2  | 0.5-27.2  |
| Felt uncomfortable or anxious at a social occasion (e.g. a party)                                                                                       | No  | 280                                                                                     | 91.7 | 87.4-94.6 | 297                                                                                            | 97.3 | 94.5-98.7 | 299                                  | 97.8 | 95.2-99.0 | 271                                   | 88.9 | 84.3-92.3 |
|                                                                                                                                                         | Yes | 25                                                                                      | 8.3  | 5.4-12.6  | 8                                                                                              | 2.7  | 1.3-5.5   | 7                                    | 2.2  | 1.0-4.9   | 34                                    | 11.1 | 7.7-15.7  |
| Had someone break or damage something that mattered to me                                                                                               | No  | 75                                                                                      | 82.8 | 72.5-89.8 | 87                                                                                             | 96.0 | 88.6-98.6 | 80                                   | 88.2 | 78.4-93.9 | 82                                    | 90.8 | 82.1-95.5 |
|                                                                                                                                                         | Yes | 16                                                                                      | 17.2 | 10.2-27.5 | 4                                                                                              | 4.0  | 1.4-11.4  | 11                                   | 11.8 | 6.1-21.6  | 8                                     | 9.2  | 4.5-17.9  |
| Had money that would have improved the quality of my life spent on their alcohol-related purchases                                                      | No  | 30                                                                                      | 66.5 | 49.1-80.4 | 44                                                                                             | 95.9 | 83.2-99.1 | 40                                   | 87.5 | 73.4-94.6 | 40                                    | 89.1 | 72.6-96.2 |
|                                                                                                                                                         | Yes | 15                                                                                      | 33.5 | 19.6-50.9 | 2                                                                                              | 4.1  | 0.9-16.8  | 6                                    | 12.5 | 5.4-26.6  | 5                                     | 10.9 | 3.8-27.4  |
| Felt genuinely concerned that they may cause harm to my children or someone else's children                                                             | No  | 45                                                                                      | 87.4 | 75.3-94.0 | 49                                                                                             | 96.9 | 87.6-99.3 | 48                                   | 94.1 | 82.4-98.2 | 41                                    | 80.9 | 65.9-90.2 |
|                                                                                                                                                         | Yes | 6                                                                                       | 12.6 | 6.0-24.7  | 2                                                                                              | 3.1  | 0.7-12.4  | 3                                    | 5.9  | 1.8-17.6  | 10                                    | 19.2 | 9.8-34.1  |
| Had to spend my personal time caring for a person with a long term health condition or disability that resulted from their current or previous drinking | No  | 47                                                                                      | 87.5 | 73.5-94.6 | 52                                                                                             | 96.4 | 86.2-99.2 | 49                                   | 91.0 | 79.4-96.4 | 34                                    | 62.4 | 47.2-75.5 |
|                                                                                                                                                         | Yes | 7                                                                                       | 12.5 | 5.4-26.5  | 2                                                                                              | 3.6  | 0.8-13.8  | 5                                    | 9.0  | 3.6-20.6  | 20                                    | 37.6 | 24.5-52.8 |
| Been let down by someone due to them failing to do something that I was counting on them to do because of their drinking                                | No  | 136                                                                                     | 81.1 | 73.5-86.9 | 160                                                                                            | 95.2 | 90.7-97.6 | 156                                  | 92.8 | 87.8-95.8 | 137                                   | 81.4 | 74.1-87.0 |
|                                                                                                                                                         | Yes | 32                                                                                      | 18.9 | 13.1-26.5 | 8                                                                                              | 4.8  | 2.4-9.4   | 12                                   | 7.2  | 4.2-12.2  | 31                                    | 18.6 | 13.0-25.9 |
| Been kept awake due to noise or disruption                                                                                                              | No  | 346                                                                                     | 93.3 | 89.8-95.7 | 362                                                                                            | 97.7 | 95.2-98.9 | 348                                  | 94.1 | 90.8-96.3 | 359                                   | 97.0 | 94.5-98.4 |
|                                                                                                                                                         | Yes | 25                                                                                      | 6.7  | 4.3-10.2  | 8                                                                                              | 2.3  | 1.1-4.8   | 22                                   | 5.9  | 3.7-9.2   | 11                                    | 3.0  | 1.6-5.5   |
| Drank alcohol myself in order to cope with the problems caused by their drinking                                                                        | No  | 22                                                                                      | 76.9 | 53.4-90.6 | 25                                                                                             | 87.3 | 66.8-95.9 | 27                                   | 93.8 | 76.5-98.6 | 25                                    | 86.0 | 62.0-95.9 |
|                                                                                                                                                         | Yes | 7                                                                                       | 23.1 | 9.4-46.6  | 4                                                                                              | 12.7 | 4.1-33.2  | 2                                    | 6.2  | 1.4-23.5  | 4                                     | 14.0 | 4.1-38.0  |
| Had to stop seeing or being in contact with someone because of their drinking                                                                           | No  | 92                                                                                      | 80.6 | 71.2-87.4 | 107                                                                                            | 93.9 | 87.2-97.2 | 106                                  | 92.7 | 85.9-96.3 | 86                                    | 75.9 | 66.1-83.6 |
|                                                                                                                                                         | Yes | 22                                                                                      | 19.4 | 12.6-28.8 | 7                                                                                              | 6.1  | 2.8-12.8  | 8                                    | 7.3  | 3.7-14.1  | 27                                    | 24.1 | 16.4-33.9 |
| Had to move out of my usual place of residence and stay somewhere else                                                                                  | No  | 12                                                                                      | 55.3 | 31.0-77.3 | 21                                                                                             | 97.4 | 81.0-99.7 | 13                                   | 59.9 | 34.8-80.7 | 20                                    | 95.4 | 80.5-99.0 |
|                                                                                                                                                         | Yes | 10                                                                                      | 44.7 | 22.7-69.0 | 1                                                                                              | 2.6  | 0.3-19.0  | 9                                    | 40.1 | 19.3-65.2 | 1                                     | 4.6  | 1.0-19.5  |
| Had to contact the police                                                                                                                               | No  | 93                                                                                      | 87.0 | 79.0-92.2 | 105                                                                                            | 97.8 | 93.1-99.3 | 101                                  | 94.8 | 88.4-97.8 | 95                                    | 88.8 | 79.1-94.3 |
|                                                                                                                                                         | Yes | 14                                                                                      | 13.0 | 7.8-21.0  | 2                                                                                              | 2.2  | 0.7-6.9   | 6                                    | 5.2  | 2.2-11.6  | 12                                    | 11.2 | 5.7-20.9  |

Supplementary Table 3: Perpetrator of harm by harm type (continued from the previous page)

| Harm type                                                                                                                                               |     | Someone else you lived with |       |            | A friend |      |           | A work colleague |       |           | Someone else you know |      |           | A stranger |       |           |
|---------------------------------------------------------------------------------------------------------------------------------------------------------|-----|-----------------------------|-------|------------|----------|------|-----------|------------------|-------|-----------|-----------------------|------|-----------|------------|-------|-----------|
|                                                                                                                                                         |     | n                           | %     | 95% CI     | n        | %    | 95% CI    | n                | %     | 95% CI    | n                     | %    | 95% CI    | n          | %     | 95% CI    |
| Had a serious argument that did NOT include physical violence                                                                                           | No  | 244                         | 94.1  | 90.2-96.5  | 167      | 64.3 | 57.5-70.5 | 249              | 96.2  | 92.5-98.1 | 233                   | 90.0 | 85.0-93.4 | 225        | 86.8  | 81.4-90.8 |
|                                                                                                                                                         | Yes | 15                          | 5.9   | 3.5-9.9    | 93       | 35.7 | 29.5-42.6 | 10               | 3.8   | 1.9-7.5   | 26                    | 10.0 | 6.6-15.0  | 34         | 13.2  | 9.2-18.6  |
| Felt physically threatened                                                                                                                              | No  | 153                         | 99.6  | 97.4-100.0 | 130      | 84.6 | 77.0-90.0 | 151              | 98.2  | 93.0-99.6 | 132                   | 85.7 | 78.0-91.1 | 61         | 39.5  | 30.9-48.8 |
|                                                                                                                                                         | Yes | 1                           | 0.4   | 0.1-2.6    | 24       | 15.4 | 1.0-23.0  | 3                | 1.8   | 0.4-7.0   | 22                    | 14.3 | 8.9-22.0  | 93         | 60.5  | 51.2-69.1 |
| Been emotionally hurt or neglected                                                                                                                      | No  | 147                         | 92.5  | 85.9-96.1  | 115      | 72.5 | 64.0-79.6 | 154              | 97.0  | 91.9-98.9 | 152                   | 95.7 | 91.1-97.9 | 150        | 94.3  | 88.7-97.2 |
|                                                                                                                                                         | Yes | 12                          | 7.6   | 3.9-14.1   | 44       | 27.6 | 20.5-36.0 | 5                | 3.0   | 1.1-8.1   | 7                     | 4.3  | 2.1-8.9   | 9          | 5.7   | 2.8-11.3  |
| Been physically hurt due to them assaulting me or acting violently                                                                                      | No  | 82                          | 97.9  | 93.2-99.4  | 71       | 85.4 | 74.7-92.0 | 79               | 94.4  | 79.9-98.6 | 74                    | 89.3 | 79.5-94.7 | 57         | 68.5  | 56.4-78.5 |
|                                                                                                                                                         | Yes | 2                           | 2.1   | 0.6-6.8    | 12       | 14.7 | 8.0-25.3  | 5                | 5.6   | 1.4-20.1  | 9                     | 10.7 | 5.3-20.5  | 26         | 31.5  | 21.5-43.6 |
| Been physically hurt due to them accidentally injuring me (e.g. by falling on me)                                                                       | No  | 46                          | 89.5  | 73.4-96.3  | 30       | 59.5 | 43.6-73.5 | 49               | 97.0  | 86.4-99.4 | 49                    | 96.8 | 90.0-99.0 | 32         | 62.5  | 46.3-76.2 |
|                                                                                                                                                         | Yes | 5                           | 10.6  | 3.7-26.6   | 21       | 40.5 | 26.5-56.4 | 2                | 3.0   | 0.6-13.6  | 2                     | 3.2  | 1.0-10.0  | 19         | 37.6  | 23.8-53.7 |
| Been put at risk in a car when someone was driving after drinking                                                                                       | No  | 69                          | 99.1  | 93.7-99.9  | 46       | 66.7 | 54.0-77.4 | 66               | 95.0  | 84.4-98.5 | 59                    | 85.3 | 74.7-91.9 | 52         | 75.5  | 61.6-85.6 |
|                                                                                                                                                         | Yes | 1                           | 0.9   | 0.1-6.3    | 23       | 33.3 | 22.6-46.0 | 3                | 5.0   | 1.5-15.6  | 10                    | 14.7 | 8.1-25.3  | 17         | 24.5  | 14.4-38.4 |
| Felt forced or pressured into sex or something sexual                                                                                                   | No  | 24                          | 86.3  | 62.9-95.9  | 22       | 80.3 | 58.5-92.2 | 27               | 100.0 | -         | 23                    | 85.5 | 65.7-94.8 | 22         | 81.0  | 55.8-93.5 |
|                                                                                                                                                         | Yes | 4                           | 13.7  | 4.1-37.1   | 5        | 19.7 | 7.8-41.5  | 0                | 0.0   | -         | 4                     | 14.5 | 5.2-34.3  | 5          | 19.0  | 6.5-44.2  |
| Felt uncomfortable or anxious at a social occasion (e.g. a party)                                                                                       | No  | 294                         | 96.5  | 93.0-98.3  | 205      | 67.2 | 61.0-72.8 | 276              | 90.6  | 86.0-93.8 | 264                   | 86.7 | 81.8-90.4 | 200        | 65.6  | 59.3-71.5 |
|                                                                                                                                                         | Yes | 11                          | 3.5   | 1.8-7.0    | 100      | 32.8 | 27.2-39.0 | 29               | 9.4   | 6.2-14.1  | 41                    | 13.4 | 9.6-18.3  | 105        | 34.4  | 28.5-40.7 |
| Had someone break or damage something that mattered to me                                                                                               | No  | 87                          | 95.7  | 88.5-98.5  | 50       | 55.8 | 43.0-67.9 | 89               | 97.8  | 90.6-99.5 | 81                    | 89.9 | 80.6-95.0 | 82         | 90.9  | 82.1-95.6 |
|                                                                                                                                                         | Yes | 4                           | 4.3   | 1.5-11.5   | 40       | 44.2 | 32.1-57.0 | 2                | 2.2   | 0.5-9.4   | 9                     | 10.1 | 5.0-19.4  | 8          | 9.1   | 4.4-17.9  |
| Had money that would have improved the quality of my life spent on their alcohol-related purchases                                                      | No  | 40                          | 88.9  | 72.6-96.0  | 29       | 63.0 | 46.6-76.8 | 45               | 98.1  | 87.0-99.8 | 43                    | 95.6 | 86.2-98.7 | 44         | 97.1  | 80.6-99.6 |
|                                                                                                                                                         | Yes | 5                           | 11.1  | 4.0-27.4   | 17       | 37.0 | 23.2-53.4 | 1                | 1.9   | 0.2-13.0  | 2                     | 4.4  | 1.3-13.8  | 1          | 3.0   | 0.4-19.4  |
| Felt genuinely concerned that they may cause harm to my children or someone else's children                                                             | No  | 50                          | 98.6  | 90.0-99.8  | 47       | 91.1 | 77.3-96.9 | 49               | 95.8  | 74.8-99.4 | 36                    | 70.7 | 54.6-82.9 | 39         | 77.1  | 62.5-87.2 |
|                                                                                                                                                         | Yes | 1                           | 1.4   | 0.2-10.0   | 5        | 8.9  | 3.1-22.7  | 2                | 4.2   | 0.6-25.2  | 15                    | 29.3 | 17.1-45.4 | 12         | 22.9% | 12.8-37.5 |
| Had to spend my personal time caring for a person with a long term health condition or disability that resulted from their current or previous drinking | No  | 53                          | 97.9  | 91.0-99.5  | 41       | 75.7 | 60.0-86.6 | 53               | 97.8  | 84.9-99.7 | 49                    | 91.2 | 78.1-96.8 | 51         | 94.6  | 85.4-98.1 |
|                                                                                                                                                         | Yes | 1                           | 2.2   | 0.5-9.0    | 13       | 24.3 | 13.4-40.0 | 1                | 2.2   | 0.3-15.1  | 5                     | 8.8  | 3.2-21.9  | 3          | 5.4   | 1.9-14.6  |
| Been let down by someone due to them failing to do something that I was counting on them to do because of their drinking                                | No  | 157                         | 93.7  | 87.6-96.9  | 95       | 56.6 | 48.1-64.7 | 150              | 89.4  | 82.1-94.0 | 156                   | 93.0 | 86.7-96.5 | 162        | 96.4  | 91.9-98.5 |
|                                                                                                                                                         | Yes | 11                          | 6.4   | 3.1-12.4   | 73       | 43.5 | 35.4-51.9 | 18               | 10.6  | 6.1-17.9  | 12                    | 7.0  | 3.5-13.3  | 6          | 3.6   | 1.5-8.1   |
| Been kept awake due to noise or disruption                                                                                                              | No  | 325                         | 87.7  | 83.7-90.9  | 314      | 84.8 | 80.3-88.4 | 365              | 98.5  | 96.3-99.4 | 296                   | 80.1 | 75.0-84.3 | 187        | 50.5  | 44.7-56.2 |
|                                                                                                                                                         | Yes | 45                          | 12.3  | 9.1-16.3   | 56       | 15.2 | 11.6-19.7 | 6                | 1.5   | 0.6-3.8   | 74                    | 20.0 | 15.7-25.1 | 183        | 49.5  | 43.8-55.3 |
| Drank alcohol myself in order to cope with the problems caused by their drinking                                                                        | No  | 27                          | 92.2  | 73.8-98.0  | 22       | 75.7 | 54.3-89.1 | 28               | 95.7  | 81.5-99.1 | 26                    | 90.3 | 75.9-96.5 | 27         | 93.4  | 70.9-98.8 |
|                                                                                                                                                         | Yes | 2                           | 7.9   | 2.0-26.2   | 7        | 24.3 | 10.9-45.7 | 1                | 4.3   | 0.9-18.5  | 3                     | 9.7  | 3.5-24.1  | 2          | 6.6   | 1.2-29.1  |
| Had to stop seeing or being in contact with someone because of their drinking                                                                           | No  | 109                         | 95.8  | 86.4-98.8  | 71       | 62.4 | 52.3-71.6 | 108              | 95.0  | 87.1-98.1 | 102                   | 89.5 | 82.3-94.0 | 109        | 95.6  | 88.8-98.4 |
|                                                                                                                                                         | Yes | 5                           | 4.2   | 1.2-13.6   | 43       | 37.6 | 28.4-47.7 | 6                | 5.0   | 1.9-12.9  | 12                    | 10.5 | 6.0-17.7  | 5          | 4.4   | 1.6-11.2  |
| Had to move out of my usual place of residence and stay somewhere else                                                                                  | No  | 21                          | 100.0 | -          | 18       | 82.9 | 62.3-93.4 | 21               | 100.0 | -         | 20                    | 94.0 | 63.8-99.3 | 20         | 94.1  | 74.7-98.8 |
|                                                                                                                                                         | Yes | 0                           | 0.0   | -          | 4        | 17.1 | 6.6-37.7  | 0                | 0.0   | -         | 1                     | 6.0  | 0.7-36.2  | 1          | 5.9   | 1.2-25.3  |
| Had to contact the police                                                                                                                               | No  | 105                         | 98.4  | 93.2-99.6  | 96       | 89.5 | 81.3-94.3 | 106              | 98.7  | 91.3-99.8 | 87                    | 81.5 | 71.2-88.7 | 59         | 55.3  | 44.3-65.8 |
|                                                                                                                                                         | Yes | 2                           | 1.6   | 0.4-6.8    | 11       | 10.5 | 5.7-18.7  | 1                | 1.3   | 0.2-8.7   | 20                    | 18.5 | 11.3-28.8 | 48         | 44.7  | 34.2-55.7 |



Supplementary Table 4: Frequency of harm by harm type (as a percentage of those who experienced each harm)

|                                                                                                                                                         | Frequency                                      | Percentage | 95% CI    |
|---------------------------------------------------------------------------------------------------------------------------------------------------------|------------------------------------------------|------------|-----------|
| had a serious argument that did NOT include physical violence                                                                                           | Daily or almost daily (i.e. 4-7 days per week) | 1.4        | 0.4 4.4   |
|                                                                                                                                                         | Weekly (i.e. 1-3 times per week)               | 4.8        | 2.7 8.6   |
|                                                                                                                                                         | Monthly (i.e. 2-3 times per month)             | 7.0        | 4.3 11.3  |
|                                                                                                                                                         | Less than once a month                         | 86.7       | 81.5 90.6 |
| felt physically threatened                                                                                                                              | Daily or almost daily (i.e. 4-7 days per week) | 4.6        | 2.1 9.9   |
|                                                                                                                                                         | Weekly (i.e. 1-3 times per week)               | 4.4        | 2.0 9.7   |
|                                                                                                                                                         | Monthly (i.e. 2-3 times per month)             | 7.6        | 3.8 14.8  |
|                                                                                                                                                         | Less than once a month                         | 83.3       | 75.2 89.2 |
| been emotionally hurt or neglected                                                                                                                      | Daily or almost daily (i.e. 4-7 days per week) | 9.0        | 5.0 15.5  |
|                                                                                                                                                         | Weekly (i.e. 1-3 times per week)               | 7.6        | 4.1 13.4  |
|                                                                                                                                                         | Monthly (i.e. 2-3 times per month)             | 15.1       | 10.0 22.3 |
|                                                                                                                                                         | Less than once a month                         | 68.3       | 59.6 75.9 |
| been physically hurt due to them assaulting me or acting violently                                                                                      | Daily or almost daily (i.e. 4-7 days per week) | 7.1        | 2.6 18.2  |
|                                                                                                                                                         | Weekly (i.e. 1-3 times per week)               | 6.3        | 2.0 17.7  |
|                                                                                                                                                         | Monthly (i.e. 2-3 times per month)             | 11.0       | 5.5 20.8  |
|                                                                                                                                                         | Less than once a month                         | 75.6       | 62.8 85.0 |
| been physically hurt due to them accidentally injuring me (eg by falling on me)                                                                         | Daily or almost daily (i.e. 4-7 days per week) | 3.9        | 0.9 15.7  |
|                                                                                                                                                         | Weekly (i.e. 1-3 times per week)               | 8.1        | 2.8 21.3  |
|                                                                                                                                                         | Monthly (i.e. 2-3 times per month)             | 11.7       | 5.0 24.7  |
|                                                                                                                                                         | Less than once a month                         | 76.3       | 61.2 86.8 |
| been put at risk in a car when someone was driving after drinking                                                                                       | Daily or almost daily (i.e. 4-7 days per week) | 8.6        | 3.4 19.9  |
|                                                                                                                                                         | Weekly (i.e. 1-3 times per week)               | 3.2        | 0.7 13.0  |
|                                                                                                                                                         | Monthly (i.e. 2-3 times per month)             | 8.5        | 3.3 20.1  |
|                                                                                                                                                         | Less than once a month                         | 79.7       | 66.6 88.6 |
| felt forced or pressured into sex or something sexual                                                                                                   | Daily or almost daily (i.e. 4-7 days per week) | 2.4        | 0.3 17.6  |
|                                                                                                                                                         | Weekly (i.e. 1-3 times per week)               | 4.5        | 0.5 28.7  |
|                                                                                                                                                         | Monthly (i.e. 2-3 times per month)             | 2.1        | 0.3 15.5  |
|                                                                                                                                                         | Less than once a month                         | 91.0       | 72.0 97.5 |
| felt uncomfortable or anxious at a social occasion (eg a party)                                                                                         | Daily or almost daily (i.e. 4-7 days per week) | 1.5        | 0.6 3.9   |
|                                                                                                                                                         | Weekly (i.e. 1-3 times per week)               | 1.0        | 0.4 2.6   |
|                                                                                                                                                         | Monthly (i.e. 2-3 times per month)             | 8.0        | 5.3 12.0  |
|                                                                                                                                                         | Less than once a month                         | 89.5       | 85.2 92.6 |
| had someone break or damage something that mattered to me                                                                                               | Daily or almost daily (i.e. 4-7 days per week) | 3.2        | 0.9 10.7  |
|                                                                                                                                                         | Weekly (i.e. 1-3 times per week)               | 5.0        | 1.9 12.5  |
|                                                                                                                                                         | Monthly (i.e. 2-3 times per month)             | 7.4        | 3.6 14.5  |
|                                                                                                                                                         | Less than once a month                         | 84.4       | 74.9 90.8 |
| had money that would have improved the quality of my life spent on their alcohol-related purchases                                                      | Daily or almost daily (i.e. 4-7 days per week) | 6.3        | 1.9 19.1  |
|                                                                                                                                                         | Weekly (i.e. 1-3 times per week)               | 7.6        | 2.1 24.0  |
|                                                                                                                                                         | Monthly (i.e. 2-3 times per month)             | 35.8       | 21.3 53.4 |
|                                                                                                                                                         | Less than once a month                         | 50.3       | 33.7 66.7 |
| felt genuinely concerned that they may cause harm to my children or someone else's children                                                             | Daily or almost daily (i.e. 4-7 days per week) | 6.1        | 1.8 18.1  |
|                                                                                                                                                         | Weekly (i.e. 1-3 times per week)               | 7.1        | 2.4 19.2  |
|                                                                                                                                                         | Monthly (i.e. 2-3 times per month)             | 24.5       | 12.9 41.4 |
|                                                                                                                                                         | Less than once a month                         | 62.3       | 45.7 76.5 |
| had to spend my personal time caring for a person with a long term health condition or disability that resulted from their current or previous drinking | Daily or almost daily (i.e. 4-7 days per week) | 19.4       | 10.2 33.8 |
|                                                                                                                                                         | Weekly (i.e. 1-3 times per week)               | 15.6       | 7.5 29.7  |
|                                                                                                                                                         | Monthly (i.e. 2-3 times per month)             | 28.0       | 16.5 43.6 |
|                                                                                                                                                         | Less than once a month                         | 37.0       | 23.8 52.4 |
| been let down by someone due to them failing to do something that I was counting on them to do because of their drinking                                | Daily or almost daily (i.e. 4-7 days per week) | 3.9        | 1.7 8.6   |
|                                                                                                                                                         | Weekly (i.e. 1-3 times per week)               | 9.6        | 5.5 16.4  |
|                                                                                                                                                         | Monthly (i.e. 2-3 times per month)             | 13.6       | 8.9 20.3  |
|                                                                                                                                                         | Less than once a month                         | 72.9       | 64.6 79.8 |
| been kept awake due to noise or disruption                                                                                                              | Daily or almost daily (i.e. 4-7 days per week) | 2.4        | 1.3 4.3   |
|                                                                                                                                                         | Weekly (i.e. 1-3 times per week)               | 12.1       | 9.0 16.1  |
|                                                                                                                                                         | Monthly (i.e. 2-3 times per month)             | 18.4       | 14.5 23.2 |
|                                                                                                                                                         | Less than once a month                         | 67.1       | 61.7 72.2 |
| drank alcohol myself in order to cope with the problems caused by their drinking                                                                        | Daily or almost daily (i.e. 4-7 days per week) | 5.2        | 1.0 22.4  |
|                                                                                                                                                         | Weekly (i.e. 1-3 times per week)               | 20.7       | 8.1 43.5  |
|                                                                                                                                                         | Monthly (i.e. 2-3 times per month)             | 42.5       | 23.0 64.8 |
|                                                                                                                                                         | Less than once a month                         | 31.6       | 14.9 54.9 |
| had to stop seeing or being in contact with someone because of their drinking                                                                           | Daily or almost daily (i.e. 4-7 days per week) | 19.3       | 11.9 29.6 |
|                                                                                                                                                         | Weekly (i.e. 1-3 times per week)               | 10.4       | 5.5 18.7  |

|    | Frequency                                                              | Percentage                                     | 95% CI |      |
|----|------------------------------------------------------------------------|------------------------------------------------|--------|------|
| 1  | Monthly (i.e. 2-3 times per month)                                     | 9.4                                            | 5.2    | 16.5 |
| 2  | Less than once a month                                                 | 61.0                                           | 50.1   | 70.8 |
| 3  | Daily or almost daily (i.e. 4-7 days per week)                         | 8.1                                            | 1.6    | 31.8 |
| 4  | had to move out of my usual place of residence and stay somewhere else | Weekly (i.e. 1-3 times per week)               | 12.0   | 42.1 |
| 5  |                                                                        | Monthly (i.e. 2-3 times per month)             | 6.1    | 24.8 |
| 6  |                                                                        | Less than once a month                         | 73.8   | 89.8 |
| 7  |                                                                        | Daily or almost daily (i.e. 4-7 days per week) | 7.8    | 16.2 |
| 8  | had to contact the police                                              | Weekly (i.e. 1-3 times per week)               | 6.5    | 15.5 |
| 9  |                                                                        | Monthly (i.e. 2-3 times per month)             | 7.5    | 14.1 |
| 10 |                                                                        | Less than once a month                         | 78.2   | 85.9 |

For peer review only

**STROBE 2007 (v4) Statement—Checklist of items that should be included in reports of *cross-sectional studies***

| Section/Topic                | Item # | Recommendation                                                                                                                                                                       | Reported on page #             |
|------------------------------|--------|--------------------------------------------------------------------------------------------------------------------------------------------------------------------------------------|--------------------------------|
| <b>Title and abstract</b>    | 1      | (a) Indicate the study's design with a commonly used term in the title or the abstract                                                                                               | 1                              |
|                              |        | (b) Provide in the abstract an informative and balanced summary of what was done and what was found                                                                                  | 2                              |
| <b>Introduction</b>          |        |                                                                                                                                                                                      |                                |
| Background/rationale         | 2      | Explain the scientific background and rationale for the investigation being reported                                                                                                 | 3                              |
| Objectives                   | 3      | State specific objectives, including any prespecified hypotheses                                                                                                                     | 3                              |
| <b>Methods</b>               |        |                                                                                                                                                                                      |                                |
| Study design                 | 4      | Present key elements of study design early in the paper                                                                                                                              | 3                              |
| Setting                      | 5      | Describe the setting, locations, and relevant dates, including periods of recruitment, exposure, follow-up, and data collection                                                      | 3                              |
| Participants                 | 6      | (a) Give the eligibility criteria, and the sources and methods of selection of participants                                                                                          | 3                              |
| Variables                    | 7      | Clearly define all outcomes, exposures, predictors, potential confounders, and effect modifiers. Give diagnostic criteria, if applicable                                             | 4                              |
| Data sources/<br>measurement | 8*     | For each variable of interest, give sources of data and details of methods of assessment (measurement). Describe comparability of assessment methods if there is more than one group | 3-4                            |
| Bias                         | 9      | Describe any efforts to address potential sources of bias                                                                                                                            | 3 (sampling) and 5 (weighting) |
| Study size                   | 10     | Explain how the study size was arrived at                                                                                                                                            | 3-4                            |
| Quantitative variables       | 11     | Explain how quantitative variables were handled in the analyses. If applicable, describe which groupings were chosen and why                                                         | 5                              |
| Statistical methods          | 12     | (a) Describe all statistical methods, including those used to control for confounding                                                                                                | 5                              |
|                              |        | (b) Describe any methods used to examine subgroups and interactions                                                                                                                  | 5                              |
|                              |        | (c) Explain how missing data were addressed                                                                                                                                          | 5                              |
|                              |        | (d) If applicable, describe analytical methods taking account of sampling strategy                                                                                                   | 5                              |
|                              |        | (e) Describe any sensitivity analyses                                                                                                                                                | NA                             |

|                          |     |                                                                                                                                                                                                              |                                                                            |
|--------------------------|-----|--------------------------------------------------------------------------------------------------------------------------------------------------------------------------------------------------------------|----------------------------------------------------------------------------|
| <b>Results</b>           |     |                                                                                                                                                                                                              |                                                                            |
| Participants             | 13* | (a) Report numbers of individuals at each stage of study—eg numbers potentially eligible, examined for eligibility, confirmed eligible, included in the study, completing follow-up, and analysed            | 5                                                                          |
|                          |     | (b) Give reasons for non-participation at each stage                                                                                                                                                         | NA                                                                         |
|                          |     | (c) Consider use of a flow diagram                                                                                                                                                                           | NA                                                                         |
| Descriptive data         | 14* | (a) Give characteristics of study participants (eg demographic, clinical, social) and information on exposures and potential confounders                                                                     | 8 and 10                                                                   |
|                          |     | (b) Indicate number of participants with missing data for each variable of interest                                                                                                                          | Not included due to space. We can add this as another supplementary table. |
| Outcome data             | 15* | Report numbers of outcome events or summary measures                                                                                                                                                         | 8 and 10                                                                   |
| Main results             | 16  | (a) Give unadjusted estimates and, if applicable, confounder-adjusted estimates and their precision (eg, 95% confidence interval). Make clear which confounders were adjusted for and why they were included | 5-11                                                                       |
|                          |     | (b) Report category boundaries when continuous variables were categorized                                                                                                                                    | NA                                                                         |
|                          |     | (c) If relevant, consider translating estimates of relative risk into absolute risk for a meaningful time period                                                                                             | NA                                                                         |
| Other analyses           | 17  | Report other analyses done—eg analyses of subgroups and interactions, and sensitivity analyses                                                                                                               | NA                                                                         |
| <b>Discussion</b>        |     |                                                                                                                                                                                                              |                                                                            |
| Key results              | 18  | Summarise key results with reference to study objectives                                                                                                                                                     | 12                                                                         |
| Limitations              | 19  | Discuss limitations of the study, taking into account sources of potential bias or imprecision. Discuss both direction and magnitude of any potential bias                                                   | 12                                                                         |
| Interpretation           | 20  | Give a cautious overall interpretation of results considering objectives, limitations, multiplicity of analyses, results from similar studies, and other relevant evidence                                   | 12-14                                                                      |
| Generalisability         | 21  | Discuss the generalisability (external validity) of the study results                                                                                                                                        | 12                                                                         |
| <b>Other information</b> |     |                                                                                                                                                                                                              |                                                                            |
| Funding                  | 22  | Give the source of funding and the role of the funders for the present study and, if applicable, for the original study on which the present article is based                                                | 5                                                                          |

\*Give information separately for cases and controls in case-control studies and, if applicable, for exposed and unexposed groups in cohort and cross-sectional studies.

1  
2  
3  
4  
5  
6  
7  
8  
9  
10  
11  
12  
13  
14  
15  
16  
17  
18  
19  
20  
21  
22  
23  
24  
25  
26  
27  
28  
29  
30  
31  
32  
33  
34  
35  
36  
37  
38  
39  
40  
41  
42  
43  
44  
45  
46  
47

**Note:** An Explanation and Elaboration article discusses each checklist item and gives methodological background and published examples of transparent reporting. The STROBE checklist is best used in conjunction with this article (freely available on the Web sites of PLoS Medicine at <http://www.plosmedicine.org/>, Annals of Internal Medicine at <http://www.annals.org/>, and Epidemiology at <http://www.epidem.com/>). Information on the STROBE Initiative is available at [www.strobe-statement.org](http://www.strobe-statement.org).

For peer review only

# BMJ Open

## Alcohol-related harm to others in England: a cross-sectional analysis of National survey data

|                                 |                                                                                                                                                                                                                                                                                                                                                                                                                                                                                                                                                                                                                                        |
|---------------------------------|----------------------------------------------------------------------------------------------------------------------------------------------------------------------------------------------------------------------------------------------------------------------------------------------------------------------------------------------------------------------------------------------------------------------------------------------------------------------------------------------------------------------------------------------------------------------------------------------------------------------------------------|
| Journal:                        | <i>BMJ Open</i>                                                                                                                                                                                                                                                                                                                                                                                                                                                                                                                                                                                                                        |
| Manuscript ID                   | bmjopen-2017-021046.R2                                                                                                                                                                                                                                                                                                                                                                                                                                                                                                                                                                                                                 |
| Article Type:                   | Research                                                                                                                                                                                                                                                                                                                                                                                                                                                                                                                                                                                                                               |
| Date Submitted by the Author:   | 12-Jul-2018                                                                                                                                                                                                                                                                                                                                                                                                                                                                                                                                                                                                                            |
| Complete List of Authors:       | Beynon, Caryl; Public Health England, Risk Factors Intelligence Team, Health Improvement Directorate<br>Bayliss, David; Public Health England, Risk Factors Intelligence Team, Health Improvement Directorate<br>Mason, Jenny; Public Health England, Risk Factors Intelligence Team, Health Improvement Directorate<br>Sweeney, Kate; Public Health England, Risk Factors Intelligence, Health Improvement Directorate<br>Perkins, Clare; Public Health England, Risk Factors Intelligence, Health Improvement Directorate<br>Henn, Clive; Public Health England, Alcohol, Drugs and Tobacco Division, Health Improvement Directorate |
| <b>Primary Subject Heading</b>: | Public health                                                                                                                                                                                                                                                                                                                                                                                                                                                                                                                                                                                                                          |
| Secondary Subject Heading:      | Epidemiology, Health policy                                                                                                                                                                                                                                                                                                                                                                                                                                                                                                                                                                                                            |
| Keywords:                       | alcohol-related harm to others, alcohol, violence                                                                                                                                                                                                                                                                                                                                                                                                                                                                                                                                                                                      |
|                                 |                                                                                                                                                                                                                                                                                                                                                                                                                                                                                                                                                                                                                                        |

SCHOLARONE™  
Manuscripts

Alcohol-related harm to others in England: a cross-sectional analysis of National survey data

Beynon C, Bayliss D, Mason J, Sweeney K, Perkins, C, Henn C

Corresponding author: Caryl Beynon

Address: Risk Factor Intelligence Team, Health Improvement Directorate, Public Health England, Suite 3b, Cunard Building, Water Street, Liverpool, L3 1DS, United Kingdom

Email: [caryl.beynon@phe.gov.uk](mailto:caryl.beynon@phe.gov.uk)

Telephone: 0151 706 6205

Co-Authors:

David Bayliss, Risk Factors Intelligence Team, Public Health England, Manchester, United Kingdom.

Jenny Mason, Risk Factors Intelligence Team, Public Health England, Liverpool, United Kingdom.

Kate Sweeney, Risk Factors Intelligence Team, Public Health England, Liverpool, United Kingdom.

Clare Perkins, Risk Factors Intelligence Team, Public Health England, Liverpool, United Kingdom.

Clive Henn, Alcohol, Drugs and Tobacco Division, Public Health England, London, United Kingdom.

## ABSTRACT

Objectives: to estimate the prevalence, the frequency and the perpetrators of alcohol-related harm to others and identify factors associated with experiencing harm and aggressive harm.

Design: Cross-sectional survey.

Setting: England.

Participants: Adults (general population) aged 16 and over.

Outcome measures: Percentage of respondents who experienced harm. Socio-economic and demographic factors associated with the outcomes. Outcomes were 1. Experienced harm/did not experience harm and 2. Experienced aggressive harm (physically threatened, physically hurt and forced/pressured into something sexual)/did not experience an aggressive harm (no aggressive harm plus no harm at all).

Results: The weighted sample was 4,874; 20.1% (95% confidence interval [CI] 18.9-21.4) reported experiencing harm in the previous 12 months and 4.6% (95% CI 4.0-5.4) reported experiencing an aggressive harm. Friends and strangers were the dominant perpetrators. Most harms occurred less than monthly but 5.2% of respondents experienced harm daily/almost daily. Factors associated with experiencing harm were: younger age, drinking harmfully/hazardously, White British, having a disability, being educated and living in private rented accommodation (compared to being an owner occupier). Being in the family stage of life (defined as having children in the household) and being retired (compared to being employed) had significantly lower odds of harm. Factors associated with experiencing an aggressive harm were similar.

Conclusions: This exploratory study shows that alcohol-related harm to others affects a sizable proportion of the population of England. Even apparently insignificant harms, like being kept awake, can have a negative impact on health, while aggressive harms are clearly of concern. That 5% of respondents experience harm daily/almost daily suggests a population of people with a particularly high burden likely to affect health. Using a standard methodology to measure harm across studies would be advantageous. Policies that focus on alcohol must take into consideration the impact of drinking on those other than the drinker.

## STRENGTHS AND LIMITATIONS OF THE STUDY

- This is the largest survey on alcohol-related harm to others in the United Kingdom and the first national survey in England.
- The sampling approach and weighting ensured the data were representative of the population of England.
- There is potential selection bias which is inherent in all national surveys.
- The use of a bespoke survey made comparison of the findings with the literature difficult but when the study was initiated no universally accepted survey was identified.

Key words: alcohol-related harm to others, alcohol, violence

Word count: 6,212



## INTRODUCTION

1  
2 The detrimental effect of alcohol is well documented; in 2012 alcohol consumption was  
3 responsible for approximately 6% of deaths and 5% of disease burden globally.<sup>1</sup> The focus has  
4 been on the harmful effects of alcohol on the drinker with less attention on the harms caused to  
5 others, including families, work colleagues and wider society. The World Health Organization's  
6 (WHO) global alcohol strategy highlights the need to consider the harm alcohol causes to people  
7 other than the drinker,<sup>2</sup> and it is these alcohol-related harms to others (AHTO) that are the focus of  
8 this study.  
9

10 Health and social data provide insight into the potential harms caused by another's drinking. Data  
11 from the Crime Survey for England and Wales, for example, show that in just over half of all violent  
12 crimes the victim perceived the offender to be under the influence of alcohol and that alcohol use  
13 is particularly implicated in violent incidents between strangers.<sup>3</sup> Data from the Department of  
14 Transport show that during 2013 to 2015, there were almost 10,000 alcohol-related road traffic  
15 accidents in England which at least one driver failed the alcohol breathalyser test (data are  
16 available at: <https://fingertips.phe.org.uk/profile/local-alcohol-profiles>), demonstrating a  
17 considerable potential harm to both the drinking driver and to others on the roads.  
18  
19

20 In the last decade or so a number of studies have aimed to quantify and explore in more detail  
21 AHTO. These studies have provided widely varying estimates of the prevalence of harm, largely  
22 due to differences in the way harms are defined and the reference population. Studies which focus  
23 on identifying the socio-demographic and behavioural factors associated with being the victim of  
24 harm do not always provide consistent findings, suggesting the need for further research. While  
25 there is a relatively consistent finding across studies that younger age increases the likelihood of  
26 experiencing harm<sup>4-6</sup>, the association of harm with other characteristics is less clear. For example,  
27 generally women have been identified as more at risk of harm from another's drinking than men  
28 but this is not consistent across all countries and some authors report this association for certain  
29 types of harm only.<sup>4-7</sup> Two studies have, for example, identified that women are more likely to  
30 experience unwanted sexual attention/harassment/assault, whereas men were more likely to  
31 experience having their belongings or property damaged.<sup>4,6</sup>  
32  
33

34 When the impact of alcohol includes the effects to the individual drinker and wider society, the cost  
35 is considerable. A review of studies in high-income countries show the gross economic costs of  
36 alcohol to range from 1.4% to 2.7% of gross domestic product; in the United Kingdom this would  
37 be equivalent to between £27 billion and £52 billion in 2016.<sup>8</sup> There is a need to better understand  
38 AHTO and the characteristics of those affected in order to implement an effective response. To  
39 date there has been no national survey of AHTO in England. The objectives of this exploratory  
40 study were to estimate the prevalence of AHTO in England, identify factors associated with being  
41 the victim of harm, the frequency with which this harm occurs and the perpetrators of harm.  
42  
43  
44

## METHOD

### The survey

45  
46  
47  
48 The questions to identify experience of AHTO were devised after an evidence review and were  
49 appended to the Alcohol Toolkit Survey (ATS) between 1<sup>st</sup> November 2015 and 31<sup>st</sup> January 2016.  
50 The ATS is a cross-sectional household survey, run by University College London and  
51 administered by Ipsos Mori using computer-assisted interviews. Each month a new sample of  
52 adults aged 16 and over who live in England complete the survey. Households are selected using  
53 a type of random location sampling which is a hybrid of random probability sampling and simple  
54 quota sampling (so that each monthly sample is representative of the population). Interviews are  
55 conducted with one member of the selected household.<sup>9</sup> The AHTO questions were self-  
56  
57  
58  
59  
60

completed on guidance from the Research Support and Governance Office, Public Health England. Due to the novel and exploratory nature of the work, no formal sample size calculation was undertaken as the parameters on which to base this were unknown. Instead, a three month window of data collection was chosen, knowing that the ATS aimed to survey approximately 1,800 adults per month.<sup>9</sup> The sample size was considerably larger than other studies of AHTO conducted in the United Kingdom.<sup>10-12</sup>

The AHTO questions asked whether or not the respondent had experienced the following harms from another's drinking in the past 12 months:

Because of someone else's drinking I have...

1. Had a serious argument that did not include physical violence.
2. Felt physically threatened.
3. Been emotionally hurt or neglected.
4. Been physically hurt due to them assaulting me or acting violently.
5. Been physically hurt due to them accidentally injuring me (e.g. by falling on me).
6. Been put at risk in a car when someone was driving after drinking.
7. Felt forced or pressured into sex or something sexual.
8. Felt uncomfortable or anxious at a social occasion (e.g. a party).
9. Had someone break or damage something that mattered to me.
10. Had money that would have improved the quality of my life spent on their alcohol-related purchases.
11. Felt genuinely concerned that they may cause harm to my children or someone else's children.
12. Had to spend my personal time caring for a person with a long term health condition or disability that resulted from their current or previous drinking.
13. Been let down by someone due to them failing to do something that I was counting on them to do because of their drinking.
14. Been kept awake due to noise or disruption.
15. Drank alcohol myself in order to cope with the problems caused by their drinking.
16. Had to stop seeing or being in contact with someone because of their drinking.
17. Had to move out of my usual place of residence and stay somewhere else.
18. Had contact with the police.

If a respondent indicated that they had experienced any of the harms they were asked to indicate who perpetrated the harm and the frequency with which the harm occurred. Response options for who perpetrated the harm were: someone you were in a relationship with (e.g. wife/husband, partner) who you lived with; someone you were in a relationship with (e.g. wife/husband, partner) who you did not live with; another family member you lived with; a family member you did not live with; someone else you lived with; a friend; a work colleague; someone else you know; a stranger; refused/prefer not to say and don't know. Response options for the frequency of harm were: daily or almost daily (i.e. 4-7 days per week); weekly (i.e. 1-3 times per week); monthly (i.e. 2-3 times per month); less than once a month; refused/prefer not to say and don't know.

A range of demographic and socio-economic variables, collected as part of the ATS, were used as independent variables: sex (female, male); age band in years (16-24, 25-44, 45-64, 65 and over); broad ethnic group (White British, Other White, Black, Asian, Other); life stage (single, pre-family, family, post-family); educational attainment (no qualifications, GSCE/O-level/CSE, A-level/vocational, degree/higher degree, other/still studying); social grade (AB [higher managerial, administrative and professional], C1 [supervisory, clerical and junior managerial, administrative and professional], C2 [skilled manual workers], D [semi-skilled and unskilled manual workers], E [state pensioners, casual and lowest grade workers, unemployed with state benefits only]); tenure of home (owned outright, bought on a mortgage, rented from local authority, rented from private

landlord, other); self-defined disability (yes, no) and employment status (employed, unemployed, economically inactive, retired). 'Life stage' was derived from age, marital status and number of children living in the household and is defined as follow: single (up to the age of 39, not married/in a civil partnership and no children in the household), pre-family (up to the age of 39, married/in a civil partnership and no children in the household), family (children living in the household) and post family (aged 40 and over, no children in the household). The respondents' alcohol consumption was measured using the Alcohol Use Disorders Identification Test (AUDIT) which can be used to identify hazardous and harmful drinkers. Here hazardous/harmful drinkers were identified as those with scores of eight or more if aged 65 or under, and scores of seven or more if aged over 65, in line with WHO guidance.<sup>13</sup>

## Analysis

Respondents who refused to complete the AHTO questions and those who chose the 'don't know' or 'refused/prefer not to say' responses for all 18 harm questions were excluded from all analyses. Chi square tests were used to compare the characteristics of those who were included in the analysis to those that were excluded due to missing data on the AHTO questions. Individuals who failed to provide a valid response to other questions were excluded from the analysis of that particular independent variable. People with one or more missing covariate were excluded from the multivariate analyses.

Two binary dependent variables were created. 'Any harm' was coded as yes if a person had experienced any of the 18 harm types in the previous 12 months. 'Aggressive harm' was coded as yes if the person had experienced one or more of the following three harms: felt physically threatened, been physically hurt due to them assaulting me or acting violently and felt forced or pressured into sex or something sexual. The categorisation of 'aggressive harm' is in line with previous research on AHTO.<sup>4</sup>

All analyses were undertaken using Stata 13 and the 'svy' command prefix for analysing survey data. Prevalence was estimated by dividing the positive responses by the total responses for each harm type, any harm and aggressive harm; 95% confidence intervals (CI) were calculated for each prevalence estimate using the standard settings of Stata's 'svy: tabulate' command.<sup>14</sup> Bivariate independence was tested using a 'corrected' Pearson chi-squared statistic for survey data [design-based *F* tests based on Rao and Scott correction].<sup>15</sup> Multivariate analyses (binary logistic regression) were conducted to model the joint effects of the independent variables significantly associated with any harm and aggressive harm in the bivariate analyses with 'no harm' and 'no aggressive harm' as the reference categories. Adjusted odds ratios (AOR) are given in comparison to the reference category for the given variable and *t* tests provide an indication of statistical significance. Where comparisons are presented between categories of a variable where neither is the reference category, an indication of statistical significance is given using adjusted Wald tests. Analyses were weighted (using weights generated by the ATS) in order to improve the representativeness of the sample relative to an English population profile using multiple socio-demographic variables.<sup>9</sup> Due to the exploratory nature of the analysis,  $\alpha$  is set at 0.05 for all tests. The risk of type I error is considered less important than the risk of type II error: deflating  $\alpha$  may limit further investigation at a point where the evidence base is developing.

## Patient and public involvement

Patients and the public were not involved in this study.

## Ethics and funding

Approval for the ATS was granted by University College London's ethics committee (reference: 0498/001) and for the AHTO questions by the Research Support and Governance Office, Public Health England (reference: R&D 055). This work was funded by Public Health England.

## RESULTS

### Missing data

The original (unweighted) sample size was 5,068. The proportion of missing data was relatively small; 96 people (1.9%) did not complete the AHTO questions and a further 91 (1.8%) answered 'don't know/refused' to all of the AHTO questions; both groups were excluded from the analyses leaving an unweighted sample size of 4,881 (or 96.3% of the original sample). Supplementary Table 1 compares the number/proportion of people included in the analyses with those who were excluded because they did not provide a response to the AHTO questions, by independent variable. There were significant differences in the proportion of people that were included and excluded for sex, tenure of home, disability and AUDIT score. Of the 4,881 people included in the bivariate analyses, 189 (3.9%) were excluded from the multivariate analyses because one or more independent variable was missing.

### Prevalence of harm

Table 1 reports the estimated prevalence of each type of harm; 20.1% (95% CI 18.9%-21.4%) of people reported experiencing at least one harm due to someone else's drinking in the past 12 months. These data by sex are reported in Supplementary Table 2. While the numbers are too small to make a comprehensive assessment of the differences by sex (and such differences are not the focus of this paper), some disparities in harm are evident. For example there is a clear difference between the proportion of men (2.1% 95% CI 1.6%-2.9%) and women (4.8% 95% CI 3.9%-5.8%) who reported experiencing alcohol-related emotional hurt or neglect. Aggressive harms were experienced by 4.6% (95% CI 4.0%-5.4%) of respondents.

Table 1: Prevalence of harm in the previous 12 months, weighted data

| Harm type                                                                                                                                               | Number of respondents who experienced harm | Percentage of respondents who experienced harm | 95% CI      |
|---------------------------------------------------------------------------------------------------------------------------------------------------------|--------------------------------------------|------------------------------------------------|-------------|
| Been kept awake due to noise or disruption                                                                                                              | 390                                        | 8.0                                            | 7.2 - 8.9   |
| Felt uncomfortable or anxious at a social occasion (e.g. a party)                                                                                       | 331                                        | 6.8                                            | 6.0 - 7.6   |
| Had a serious argument that did NOT include physical violence                                                                                           | 275                                        | 5.7                                            | 5.0 - 6.4   |
| Been let down by someone due to them failing to do something that I was counting on them to do because of their drinking                                | 174                                        | 3.6                                            | 3.0 - 4.2   |
| Been emotionally hurt or neglected                                                                                                                      | 170                                        | 3.5                                            | 3.0 - 4.1   |
| Felt physically threatened                                                                                                                              | 164                                        | 3.4                                            | 2.8 - 4.0   |
| Had to stop seeing or being in contact with someone because of their drinking                                                                           | 120                                        | 2.5                                            | 2.0 - 3.0   |
| Had to contact the police                                                                                                                               | 117                                        | 2.4                                            | 2.0 - 2.9   |
| Had someone break or damage something that mattered to me                                                                                               | 95                                         | 1.9                                            | 1.5 - 2.5   |
| Been physically hurt due to them assaulting me or acting violently                                                                                      | 92                                         | 1.9                                            | 1.5 - 2.4   |
| Been put at risk in a car when someone was driving after drinking                                                                                       | 75                                         | 1.5                                            | 1.2 - 2.0   |
| Felt genuinely concerned that they may cause harm to my children or someone else's children                                                             | 61                                         | 1.2                                            | 0.9 - 1.6   |
| Had to spend my personal time caring for a person with a long term health condition or disability that resulted from their current or previous drinking | 57                                         | 1.2                                            | 0.9 - 1.5   |
| Been physically hurt due to them accidentally injuring me (e.g. by falling on me)                                                                       | 53                                         | 1.1                                            | 0.8 - 1.5   |
| Had money that would have improved the quality of my life spent on their alcohol-related purchases                                                      | 50                                         | 1.0                                            | 0.8 - 1.4   |
| Drank alcohol myself in order to cope with the problems caused by their drinking                                                                        | 33                                         | 0.7                                            | 0.5 - 1.0   |
| Felt forced or pressured into sex or something sexual                                                                                                   | 33                                         | 0.7                                            | 0.5 - 1.0   |
| Had to move out of my usual place of residence and stay somewhere else                                                                                  | 25                                         | 0.5                                            | 0.3 - 0.8   |
| At least one reported harm                                                                                                                              | 980                                        | 20.1                                           | 18.9 - 21.4 |
| At least one aggressive harm                                                                                                                            | 225                                        | 4.6                                            | 4.0 - 5.4   |

Weighted N = 4,874.

### Bivariate and multivariate results (factors associated with harm)

Factors associated with experiencing any harm in the bivariate analyses are reported in Table 2. Experience of harm decreased with age. This trend by age was reflected in experience of harm by life stage, with 36.5% (95% CI 32.8%-40.5%) of single people experiencing harm compared to 15.0% (95% CI 13.4%-16.7%) of those in a 'post-family' life stage. White British people were more likely to report experiencing harm (21.8%, 95% CI 20.3%-23.4%) than people of other broad ethnic groups; people of Asian ethnicity had the lowest prevalence (10.9%, 95% CI 8.2%-14.2%). People with no qualifications were least likely to report experiencing harm (9.9%, 95% CI 7.9%-12.5%). Those whose highest attainment was A-level or vocational had the highest prevalence (26.7%, 95% CI 24.1%-29.3%). People in the private-rented sector had the highest harm prevalence by tenure (29.9%, 95% CI 26.9%-33.1%). This compares to just 14.0% (95% CI 12.3%-16.0%) of people who owned their home outright experiencing harm. People who considered themselves disabled were more likely to report having experienced harm than those who did not (24.0%, 95% CI 20.3%-28.1%, compared to 19.7%, 95% CI 18.4%-21.1%). Those who were unemployed (26.8%, 95% CI 21.0%-33.6%) or economically inactive (26.8%, 95% CI 24.0%-29.9%) were more likely to report harm than those employed (22.0%, 95% CI 20.2%-24.0%); the difference between the unemployed and employed was not significant. Retired people were much less likely to report experiencing at least one harm (9.1%, 95% CI 7.5%-10.9%) than all other employment statuses. The prevalence of AHTO

1 was significantly higher among hazardous/harmful drinkers (37.9%, 95% CI 33.9%-42.1%)  
2 compared to those who were not (17.3%, 95% CI 16.0%-18.6%).  
3

4 In the multivariate model, young age remained strongly associated with experiencing harm  
5 due to someone else's drinking, with those aged 16-24 having greater odds of  
6 experiencing harm than all older age groups (Table 2). Being a hazardous/harmful drinker  
7 was strongly associated with experiencing harm; the odds of experiencing harm were  
8 around double the odds of those who were not hazardous/harmful drinkers. Being White  
9 British compared to being in an Other White, Black or Asian ethnic group was also  
10 associated with greater odds of experiencing harm, as was considering oneself disabled,  
11 being educated, and living in private rented accommodation relative to being an owner  
12 occupier. The odds of experiencing harm were lower for respondents in the family stage of  
13 life than the odds for those that were single. The odds of experiencing harm were lower for  
14 retired respondents than the odds for employed respondents.  
15  
16  
17  
18  
19  
20  
21  
22  
23  
24  
25  
26  
27  
28  
29  
30  
31  
32  
33  
34  
35  
36  
37  
38  
39  
40  
41  
42  
43  
44  
45  
46  
47  
48  
49  
50  
51  
52  
53  
54  
55  
56  
57  
58  
59  
60

Table 2: Bivariate and multivariate comparisons of harm versus no harm from another's drinking in past 12 months, weighted data

| Independent variable                  | Bivariate comparisons |      |             |      |      |             | Multivariate comparisons   |        |             |
|---------------------------------------|-----------------------|------|-------------|------|------|-------------|----------------------------|--------|-------------|
|                                       | No harm               |      |             | Harm |      |             | AOR                        | p      | 95% CI      |
|                                       | N                     | %    | 95% CI      | N    | %    | 95% CI      |                            |        |             |
| <b>Sex</b>                            |                       |      |             |      |      |             |                            |        |             |
| Female                                | 2,008                 | 80.1 | 78.3 - 81.8 | 498  | 19.9 | 18.2 - 21.7 | Not entered into the model |        |             |
| Male                                  | 1,887                 | 79.7 | 77.7 - 81.4 | 482  | 20.3 | 18.6 - 22.3 |                            |        |             |
| <b>Age band<sup>†</sup></b>           |                       |      |             |      |      |             |                            |        |             |
| 16-24                                 | 446                   | 63.4 | 59.6 - 67.0 | 258  | 36.6 | 33.0 - 40.4 | Reference                  |        |             |
| 25-44                                 | 1,278                 | 78.4 | 76.0 - 80.7 | 352  | 21.6 | 19.3 - 24.0 | 0.63                       | <0.001 | 0.49 - 0.83 |
| 45-64                                 | 1,237                 | 81.5 | 79.1 - 83.7 | 281  | 18.5 | 16.3 - 20.9 | 0.50                       | <0.001 | 0.34 - 0.75 |
| 65+                                   | 933                   | 91.2 | 89.3 - 92.9 | 90   | 8.8  | 7.1 - 10.7  | 0.36                       | <0.001 | 0.21 - 0.61 |
| <b>Broad ethnic group<sup>†</sup></b> |                       |      |             |      |      |             |                            |        |             |
| White British                         | 2,975                 | 78.2 | 76.7 - 79.7 | 830  | 21.8 | 20.3 - 23.4 | Reference                  |        |             |
| Other White groups                    | 334                   | 84.9 | 80.4 - 88.5 | 59   | 15.1 | 11.5 - 19.6 | 0.52                       | <0.001 | 0.36 - 0.76 |
| Black groups                          | 151                   | 83.9 | 78.6 - 88.1 | 29   | 16.1 | 11.9 - 21.4 | 0.61                       | 0.017  | 0.41 - 0.92 |
| Asian groups                          | 376                   | 89.1 | 85.8 - 91.8 | 46   | 10.9 | 8.2 - 14.2  | 0.39                       | <0.001 | 0.28 - 0.56 |
| Other groups                          | 44                    | 82.2 | 68.7 - 90.7 | 9    | 17.8 | 9.3 - 31.3  | 0.60                       | 0.154  | 0.30 - 1.21 |
| <b>Life stage<sup>†</sup></b>         |                       |      |             |      |      |             |                            |        |             |
| Single                                | 436                   | 63.5 | 59.5 - 67.2 | 251  | 36.5 | 32.8 - 40.5 | Reference                  |        |             |
| Pre-family                            | 222                   | 72.2 | 65.6 - 77.9 | 86   | 27.8 | 22.1 - 34.4 | 0.91                       | 0.620  | 0.61 - 1.34 |
| Family                                | 1,285                 | 81.1 | 78.8 - 83.2 | 299  | 18.9 | 16.8 - 21.2 | 0.68                       | 0.006  | 0.52 - 0.89 |
| Post family                           | 1,950                 | 85.0 | 83.3 - 86.6 | 344  | 15.0 | 13.4 - 16.7 | 0.85                       | 0.433  | 0.56 - 1.28 |
| <b>Education<sup>†</sup></b>          |                       |      |             |      |      |             |                            |        |             |
| No qualifications                     | 683                   | 90.1 | 87.5 - 92.2 | 75   | 9.9  | 7.8 - 12.5  | Reference                  |        |             |
| GCSE/O-level/CSE                      | 764                   | 79.3 | 76.2 - 82.1 | 199  | 20.7 | 17.9 - 23.8 | 1.74                       | <0.001 | 1.25 - 2.44 |
| A-level/vocational                    | 974                   | 73.3 | 70.7 - 75.9 | 354  | 26.7 | 24.1 - 29.3 | 2.04                       | <0.001 | 1.48 - 2.82 |
| Degree/higher degree                  | 1,156                 | 79.3 | 76.8 - 81.7 | 301  | 20.7 | 18.3 - 23.2 | 2.16                       | <0.001 | 1.56 - 3.00 |
| Other/still studying                  | 294                   | 85.6 | 81.2 - 89.1 | 50   | 14.4 | 10.9 - 18.9 | 1.42                       | 0.109  | 0.92 - 2.18 |
| <b>Social grade<sup>‡</sup></b>       |                       |      |             |      |      |             |                            |        |             |
| AB                                    | 1,066                 | 80.8 | 78.0 - 83.3 | 254  | 19.2 | 16.7 - 22.0 | Not entered into the model |        |             |
| C1                                    | 1,023                 | 77.4 | 75.0 - 79.6 | 299  | 22.6 | 20.4 - 25.0 |                            |        |             |
| C2                                    | 878                   | 81.7 | 78.8 - 84.4 | 196  | 18.3 | 15.6 - 21.2 |                            |        |             |
| D                                     | 614                   | 82.5 | 79.1 - 85.4 | 131  | 17.5 | 14.6 - 20.9 |                            |        |             |
| E                                     | 313                   | 75.8 | 71.8 - 79.4 | 100  | 24.2 | 20.6 - 28.2 |                            |        |             |
| <b>Tenure<sup>†</sup></b>             |                       |      |             |      |      |             |                            |        |             |
| Owned outright                        | 1,451                 | 86.0 | 84.0 - 87.8 | 237  | 14.0 | 12.3 - 16.0 | Reference                  |        |             |
| Bought on a mortgage                  | 1,142                 | 79.2 | 76.4 - 81.6 | 301  | 20.9 | 18.4 - 23.6 | 0.97                       | 0.825  | 0.74 - 1.28 |
| Rented from local authority           | 341                   | 78.8 | 74.6 - 82.5 | 92   | 21.2 | 17.6 - 25.4 | 1.38                       | 0.060  | 0.99 - 1.94 |
| Rented from private landlord          | 678                   | 70.1 | 66.9 - 73.1 | 289  | 29.9 | 26.9 - 33.1 | 1.52                       | 0.004  | 1.15 - 2.01 |
| Other                                 | 248                   | 81.1 | 76.7 - 84.8 | 58   | 19.0 | 15.2 - 23.4 | 1.11                       | 0.562  | 0.77 - 1.61 |
| <b>Disability<sup>†</sup></b>         |                       |      |             |      |      |             |                            |        |             |
| Considers self disabled               | 396                   | 76.0 | 71.9 - 79.7 | 125  | 24.0 | 20.3 - 28.1 | Reference                  |        |             |
| Not disabled                          | 3,422                 | 80.3 | 78.9 - 81.6 | 842  | 19.7 | 18.4 - 21.1 | 0.56                       | <0.001 | 0.42 - 0.74 |
| <b>Employment status<sup>†</sup></b>  |                       |      |             |      |      |             |                            |        |             |
| Employed                              | 2,081                 | 78.0 | 76.0 - 79.8 | 588  | 22.0 | 20.2 - 24.0 | Reference                  |        |             |
| Unemployed                            | 157                   | 73.2 | 66.4 - 79.0 | 58   | 26.8 | 21.0 - 33.6 | 1.09                       | 0.648  | 0.75 - 1.58 |
| Economically inactive                 | 634                   | 73.2 | 70.1 - 76.1 | 232  | 26.8 | 24.0 - 29.9 | 1.01                       | 0.896  | 0.81 - 1.27 |
| Retired                               | 1,021                 | 90.9 | 89.1 - 92.5 | 102  | 9.1  | 7.5 - 10.9  | 0.54                       | <0.001 | 0.38 - 0.78 |
| <b>AUDIT<sup>†</sup></b>              |                       |      |             |      |      |             |                            |        |             |
| Not hazardous/harmful drinking        | 3,463                 | 82.7 | 81.4 - 84.0 | 723  | 17.3 | 16.0 - 18.6 | Reference                  |        |             |
| Hazardous/harmful drinking            | 419                   | 62.1 | 57.9 - 66.1 | 256  | 37.9 | 33.9 - 42.1 | 2.06                       | <0.001 | 1.66 - 2.56 |

Weighted N = 4,874 (bivariate analyses) and 4,698 (multivariate analysis). Bivariate totals that are 4,875 not 4,874 are due to rounding as the analyses use weighted data.

AOR: adjusted odds ratio.

<sup>†</sup>test of bivariate independence indicates significant difference ( $p < 0.05$ ).

<sup>‡</sup>AB is higher managerial, administrative and professional and Intermediate managerial, administrative and professional; C1 is supervisory, clerical and junior managerial, administrative and professional; C2 is skilled manual workers; D is semi-skilled and unskilled manual workers; and E is state pensioners, casual and lowest grade workers, unemployed with state benefits only.

## Aggressive harm

In bivariate analyses, men were marginally more likely to experience an aggressive harm than women (5.3% and 4.0% respectively,  $p = 0.04$ , Table 3). The other characteristics associated with experiencing aggressive harms were similar to experiencing any harm, with a higher prevalence of aggressive harm associated with being younger, disabled, single, non-retired, White British, renting accommodation and being a hazardous/harmful drinker.

1 Controlling for other variables in the model, sex and stage of life were not associated with  
2 experiencing an aggressive harm (Table 3). Age remained associated with harm after  
3 adjustment for other variables; those aged 45 and over had lower odds of experiencing an  
4 aggressive harm than those aged 16-24. Disability was also strongly associated with  
5 experience of aggressive harm; the odds of experiencing aggressive harm for non-disabled  
6 people was just over a third of the odds for disabled people (adjusted OR=0.37, 95% CI  
7 0.24-0.59). Housing tenure was relatively strongly associated, with the odds of  
8 experiencing an aggressive harm for renters around double the odds of those who are  
9 home owners. This was also the case for hazardous/harmful drinkers, with an adjusted  
10 odds ratio of 2.35 (95% CI 1.63-3.40) relative to those who were not hazardous/harmful  
11 drinkers. Being White British compared to being in the other White, Black or Asian ethnic  
12 groups was also associated with greater odds of experiencing an aggressive harm.  
13 Differences in the odds of experiencing aggressive harm between people with different  
14 educational attainment were minimal; the only significant difference being the greater odds  
15 for those with a degree/higher degree relative to those with no qualifications. The odds of  
16 experiencing an aggressive harm for those that were retired remained significantly lower  
17 than the odds of an aggressive harm for those that were employed (AOR 0.33, 95% CI  
18 0.13-0.83).  
19  
20  
21  
22  
23  
24  
25  
26  
27  
28  
29  
30  
31  
32  
33  
34  
35  
36  
37  
38  
39  
40  
41  
42  
43  
44  
45  
46  
47  
48  
49  
50  
51  
52  
53  
54  
55  
56  
57  
58  
59  
60



Table 3: Bivariate and multivariate comparisons of aggressive harm versus no aggressive harm from another's drinking in past 12 months, weighted data

| Independent variable                  | Bivariate comparisons |      |             |                 |      |            | Multivariate comparisons   |        |             |
|---------------------------------------|-----------------------|------|-------------|-----------------|------|------------|----------------------------|--------|-------------|
|                                       | No aggressive harm    |      |             | Aggressive harm |      |            | AOR                        | p      | 95% CI      |
|                                       | N                     | %    | 95% CI      | N               | %    | 95% CI     |                            |        |             |
| <b>Sex<sup>†</sup></b>                |                       |      |             |                 |      |            |                            |        |             |
| Male                                  | 2,242                 | 94.7 | 93.5 - 95.6 | 127             | 5.3  | 4.4 - 6.5  | Reference                  |        |             |
| Female                                | 2,407                 | 96.1 | 95.1 - 96.8 | 99              | 4.0  | 3.2 - 4.9  | 0.74                       | 0.086  | 0.53 - 1.04 |
| <b>Age band<sup>†</sup></b>           |                       |      |             |                 |      |            |                            |        |             |
| 16-24                                 | 646                   | 91.7 | 89.1 - 93.6 | 59              | 8.4  | 6.4 - 10.9 | Reference                  |        |             |
| 25-44                                 | 1,539                 | 94.4 | 92.9 - 95.6 | 91              | 5.6  | 4.4 - 7.1  | 0.84                       | 0.510  | 0.49 - 1.43 |
| 45-64                                 | 1,454                 | 95.8 | 94.4 - 96.9 | 64              | 4.2  | 3.1 - 5.6  | 0.43                       | 0.024  | 0.20 - 0.89 |
| 65+                                   | 1,010                 | 98.8 | 98.0 - 99.3 | 12              | 1.2  | 0.7 - 2.0  | 0.29                       | 0.044  | 0.09 - 0.97 |
| <b>Broad ethnic group<sup>†</sup></b> |                       |      |             |                 |      |            |                            |        |             |
| White British                         | 3,605                 | 94.8 | 93.8 - 95.5 | 200             | 5.3  | 4.5 - 6.2  | Reference                  |        |             |
| Other White groups                    | 384                   | 97.7 | 95.6 - 98.8 | 9               | 2.3  | 1.2 - 4.4  | 0.30                       | 0.002  | 0.14 - 0.64 |
| Black groups                          | 176                   | 97.6 | 95.1 - 98.8 | 4               | 2.4  | 1.2 - 4.9  | 0.37                       | 0.020  | 0.16 - 0.86 |
| Asian groups                          | 411                   | 97.5 | 95.4 - 98.7 | 11              | 2.5  | 1.4 - 4.7  | 0.43                       | 0.023  | 0.21 - 0.89 |
| Other groups                          | 52                    | 97.5 | 88.7 - 99.5 | 1               | 2.5  | 0.5 - 11.3 | 0.36                       | 0.217  | 0.07 - 1.83 |
| <b>Life stage<sup>†</sup></b>         |                       |      |             |                 |      |            |                            |        |             |
| Single                                | 629                   | 91.5 | 88.9 - 93.6 | 58              | 8.5  | 6.4 - 11.1 | Reference                  |        |             |
| Pre-family                            | 286                   | 92.9 | 88.2 - 95.9 | 22              | 7.1  | 4.2 - 11.8 | 1.23                       | 0.573  | 0.60 - 2.50 |
| Family                                | 1,519                 | 95.9 | 94.7 - 96.9 | 65              | 4.1  | 3.1 - 5.3  | 0.89                       | 0.684  | 0.52 - 1.55 |
| Post family                           | 2,213                 | 96.5 | 95.5 - 97.3 | 81              | 3.5  | 2.7 - 4.6  | 1.80                       | 0.097  | 0.90 - 3.60 |
| <b>Education<sup>†</sup></b>          |                       |      |             |                 |      |            |                            |        |             |
| No qualifications                     | 739                   | 97.5 | 96.0 - 98.4 | 19              | 2.6  | 1.6 - 4.0  | Reference                  |        |             |
| GCSE/O-level/CSE                      | 911                   | 94.6 | 92.6 - 96.1 | 52              | 5.4  | 3.9 - 7.4  | 1.75                       | 0.069  | 0.96 - 3.21 |
| A-level/vocational                    | 1242                  | 93.6 | 91.9 - 94.9 | 86              | 6.5  | 5.1 - 8.1  | 1.69                       | 0.077  | 0.95 - 3.01 |
| Degree/higher degree                  | 1396                  | 95.8 | 94.3 - 96.9 | 62              | 4.2  | 3.1 - 5.7  | 1.94                       | 0.042  | 1.02 - 3.69 |
| Other/still studying                  | 337                   | 97.9 | 95.8 - 99.0 | 7               | 2.1  | 1.0 - 4.2  | 0.88                       | 0.788  | 0.36 - 2.16 |
| <b>Social grade<sup>‡</sup></b>       |                       |      |             |                 |      |            |                            |        |             |
| AB                                    | 1,265                 | 95.9 | 94.2 - 97.1 | 54              | 4.1  | 2.9 - 5.8  | Not entered into the model |        |             |
| C1                                    | 1,267                 | 95.8 | 94.6 - 96.8 | 55              | 4.2  | 3.2 - 5.4  |                            |        |             |
| C2                                    | 1,016                 | 94.6 | 92.5 - 96.0 | 59              | 5.5  | 4.0 - 7.5  |                            |        |             |
| D                                     | 718                   | 96.4 | 94.5 - 97.6 | 27              | 3.6  | 2.4 - 5.5  |                            |        |             |
| E                                     | 382                   | 92.6 | 89.8 - 94.7 | 30              | 7.4  | 5.3 - 10.2 |                            |        |             |
| <b>Tenure<sup>†</sup></b>             |                       |      |             |                 |      |            |                            |        |             |
| Owned outright                        | 1,648                 | 97.7 | 96.7 - 98.3 | 40              | 2.4  | 1.7 - 3.3  | Reference                  |        |             |
| Bought on a mortgage                  | 1,386                 | 96.0 | 94.5 - 97.2 | 57              | 4.0  | 2.8 - 5.5  | 1.03                       | 0.918  | 0.57 - 1.88 |
| Rented from local authority           | 405                   | 93.5 | 90.4 - 95.6 | 28              | 6.5  | 4.4 - 9.6  | 2.58                       | 0.006  | 1.31 - 5.09 |
| Rented from private landlord          | 885                   | 91.5 | 89.3 - 93.3 | 82              | 8.5  | 6.7 - 10.7 | 2.33                       | 0.003  | 1.34 - 4.05 |
| Other                                 | 287                   | 94.0 | 91.0 - 96.0 | 18              | 6.0  | 4.0 - 9.0  | 2.04                       | 0.039  | 1.04 - 4.02 |
| <b>Disability<sup>†</sup></b>         |                       |      |             |                 |      |            |                            |        |             |
| Considers self disabled               | 477                   | 91.4 | 88.4 - 93.7 | 45              | 8.6  | 6.3 - 11.7 | Reference                  |        |             |
| Not disabled                          | 4,086                 | 95.8 | 95.1 - 96.5 | 178             | 4.2  | 3.5 - 4.9  | 0.37                       | <0.001 | 0.24 - 0.59 |
| <b>Employment status<sup>†</sup></b>  |                       |      |             |                 |      |            |                            |        |             |
| Employed                              | 2,535                 | 95.0 | 93.8 - 95.9 | 135             | 5.0  | 4.1 - 6.2  | Reference                  |        |             |
| Unemployed                            | 204                   | 95.0 | 91.3 - 97.2 | 11              | 5.0  | 2.8 - 8.7  | 0.62                       | 0.166  | 0.32 - 1.22 |
| Economically inactive                 | 799                   | 92.2 | 90.2 - 93.9 | 67              | 7.8  | 6.1 - 9.8  | 1.10                       | 0.654  | 0.73 - 1.66 |
| Retired                               | 1,110                 | 98.9 | 98.1 - 99.3 | 13              | 1.1  | 0.7 - 1.9  | 0.33                       | 0.018  | 0.13 - 0.83 |
| <b>AUDIT<sup>†</sup></b>              |                       |      |             |                 |      |            |                            |        |             |
| Not hazardous/harmful drinking        | 4,038                 | 96.5 | 95.7 - 97.1 | 149             | 3.6  | 2.9 - 4.3  | Reference                  |        |             |
| Hazardous/harmful drinking            | 599                   | 88.7 | 85.6 - 91.2 | 76              | 11.3 | 8.8 - 14.4 | 2.35                       | <0.001 | 1.63 - 3.40 |

Weighted N = 4,874 (bivariate analyses) and 4,698 (multivariate analysis). Bivariate totals that are 4,875 not 4,874 are due to rounding as the analyses use weighted data.

AOR: adjusted odds ratio.

<sup>†</sup>test of bivariate independence indicates significant difference (p<0.05).

<sup>‡</sup>AB is higher managerial, administrative and professional and Intermediate managerial, administrative and professional; C1 is supervisory, clerical and junior managerial, administrative and professional; C2 is skilled manual workers; D is semi-skilled and unskilled manual workers; and E is state pensioners, casual and lowest grade workers, unemployed with state benefits only.

## Perpetrators of harm

The most frequently reported perpetrators of harms were friends (23.4% of total perpetrator reports) and strangers (22.9%), while work colleagues were the least reported perpetrators (3.7%, Figure 1). The perpetrator varied according to the type of harm (Supplementary Table 3). Focussing on the most common harms experienced, being kept awake due to noise or disruption was predominantly perpetrated by strangers (49.5%, 95% CI 43.8%-55.3%), while both strangers and friends were the most common cause of feeling uncomfortable or anxious at a social occasion (strangers 34.4%, 95% CI 28.5%-40.7%;

1 friends 32.8%, 95 CI 27.2%-39.0%). Serious arguments that did not include physical  
2 violence were predominantly perpetrated by friends (35.7%, 95% CI 29.5%-42.6%) or  
3 someone the respondent was in a relationship with and lived with (23.1%, 95% CI 17.6%-  
4 29.6%). Likewise, being let down by someone or being emotionally hurt or neglected were  
5 harm types perpetrated by people close to respondents.  
6

7  
8 Strangers were most likely to be the perpetrators of two of the aggressive harms: 60.5%  
9 (95% CI 51.2%-69.1%) of respondents reporting feeling physically threatened by a  
10 stranger and 31.5% (95% CI 21.5%-43.6%) of respondents reporting being physically hurt  
11 by a stranger. While 19.0% (95% CI 6.5%-44.2%) of respondents reported being forced or  
12 pressured into sex or something sexual by a stranger, the most commonly reported  
13 perpetrator for this sexual aggressive harm was someone the respondent was in a  
14 relationship with and lived with (23.3%, 95% CI 9.8%-46.0%; rising to 39.9% when also  
15 including people in a relationship who lived elsewhere).  
16  
17

18  
19 Insert Figure 1 here.  
20

21 Breaking perpetrator type down further by sex reveals significant differences (data not  
22 reported). Focusing on aggressive harms only, of those who had experienced an  
23 aggressive harm, women were more likely than men to report the perpetrator being  
24 someone they were in a relationship with and lived with. This is true for feeling physically  
25 threatened (21.2% vs 4.1%,  $p<0.001$ ), being physically hurt (37.8% vs 6.3%,  $p<0.001$ ) and  
26 being forced or pressured into sex or something sexual (though not with statistical  
27 significance due to small numbers of people reporting this type of harm, 34.3% vs 0.0%,  
28  $p=0.077$ ). In contrast, of those who had experienced an aggressive harm men were more  
29 likely than women to report feeling physically threatened by a stranger (71.4% vs 46.1%,  
30  $p=0.008$ ) and being physically hurt by stranger (42.2% vs 18.0%,  $p=0.036$ ).  
31  
32  
33

### 34 **Frequency of harm**

35 Figure 2 reports information on the frequency with which harms were experienced. The  
36 majority of reported harms were experienced less than once a month (74.8%); 12.8%  
37 experienced harm at least monthly but less than weekly, 7.2% experienced weekly but less  
38 than daily, and 5.2% experienced daily or almost daily.  
39  
40

41  
42 Insert Figure 2 here.  
43

44 The frequency of harm varied by harm type (Supplementary Table 4). The harm types  
45 reported to reoccur most often were those whose description implies that the harm occurs  
46 over a prolonged period of time with someone whom the respondent was in regular  
47 contact. These included 'had to spend my personal time caring for a person with a long  
48 term health condition or disability that resulted from their current or previous drinking'  
49 (19.4% daily or almost daily, 95% CI 10.2%-33.8%) and 'had to stop seeing or being in  
50 contact with someone because of their drinking' (19.3% daily or almost daily, 95% CI  
51 11.9%-29.6%). It was less common for other harms to be experienced at a daily or almost  
52 daily frequency. Nevertheless, all harm types had at least one respondent reporting daily  
53 or almost daily frequency of harm.  
54  
55  
56  
57  
58  
59  
60

## DISCUSSION

1  
2 In this exploratory study one in five respondents experienced AHTO in the previous 12 months.  
3 The most commonly reported AHTO were being kept awake due to noise or disruption and feeling  
4 uncomfortable or anxious at a social occasion, which have been identified as the most prevalent  
5 harms in other studies.<sup>4 5</sup> More concerning, 4.6% reported experiencing an aggressive harm.  
6 Experiencing AHTO was associated with a number of demographic and socio-economic variables.  
7 Friends and strangers were the dominant perpetrators of AHTO. Most harms occurred less than  
8 monthly but some respondents experienced harm daily or almost daily.  
9

10  
11 The main strength of this study is its large sample size; this is the largest survey on AHTO to have  
12 been conducted in the United Kingdom and the first to provide data for England. The sampling and  
13 weighting strategy were employed to ensure the sample was representative of the English  
14 population and thus the generalisability of the findings. There are a number of limitations to note.  
15 Recall is always a problem with surveys; harms that occurred a year ago or had little impact on the  
16 respondent may be more difficult to recall. Attributing causality is not possible using a cross  
17 sectional design. There are also some social groups that are systematically missing from surveys  
18 such as homeless people, those in hospital or care homes and those who are incarcerated;  
19 populations whose alcohol use is likely different.<sup>16</sup> Previous studies on AHTO have also largely  
20 relied on cross-sectional surveys and are affected by the same limitations. A response rate could  
21 not be calculated because Ipsos Mori did not collect the necessary data. While the total amount of  
22 missing data is small, any missing data can potentially introduce bias. There were some significant  
23 differences in the characteristics of those that answered the AHTO questions and those that did  
24 not. The internal validity of the AHTO questions used here has not been measured; in the initial  
25 search of the literature the authors failed to identify a validated survey. Consequently it is possible  
26 that discrepancies exist between the responses provided by participants and their actual  
27 experience of alcohol-related harm. Finally, ecological fallacy, where the inferences about  
28 individuals are made based upon data for a group, is also a consideration in this type of study. It is  
29 likely that systematic differences exist in harm by population sub-groups (for example by sex and  
30 ethnicity) and future work on AHTO in the UK should explore this. It is possible that the findings on  
31 factors associated with harm represent those that are associated with the most common but 'low  
32 impact' harms and cannot be generalised to more severe harms. However, that we specifically  
33 examine factors associated with aggressive harms (which are the most serious harms considered)  
34 mitigates this. That said, further research to identify the factors associated with individual harms  
35 would be advantageous.  
36  
37  
38

39 In this study the prevalence of harm was 20.1%. The closest comparison is from a cross-sectional  
40 survey conducted in Wales in 2015 which used identical AHTO questions and reported the  
41 prevalence of any harm in the previous 12 months to be 59.7%.<sup>11</sup> There is some evidence from  
42 routine data to support a lower prevalence of harm in England than Wales. For example, the  
43 percentage of violent incidents where the victim believed the offender(s) to be under the influence  
44 of alcohol tends to be higher in Wales than England<sup>17</sup> although not conclusively so. However, the  
45 magnitude of the difference in the reported prevalence of harm between England and Wales  
46 seems questionable, given the similarities between the two nations. This difference could be due,  
47 in part, to differences in methodology and caution needs to be applied in drawing direct  
48 comparisons. In England the harm questions were asked after the ATS questions; this may have  
49 affected how people perceived harm, and therefore how they responded to the harm questions. It  
50 is also possible that respondents were experiencing fatigue by the end of the survey and this may  
51 have affected how fully they reported their experiences of harm. The English survey was  
52 administered face-to-face while the survey in Wales was administered via the telephone using  
53 landline numbers. Using data from the USA, researchers comparing face-to-face and telephone  
54 interviews reported that telephone surveys may miss certain sections of the population if they  
55 solely rely on landlines, including those with lower incomes.<sup>18</sup> However the Welsh survey was  
56  
57  
58

1 weighted so the data were representative of the deprivation of the general population.<sup>11</sup> Other  
2 surveys of AHTO conducted in the United Kingdom have reported the prevalence of harm in adults  
3 to be 46.3%<sup>10</sup> and 51%<sup>12</sup> in Scotland and 79% in the North West of England,<sup>12</sup> however these  
4 studies used very different AHTO questions so the results are not comparable. Despite the  
5 difference in prevalence between the Welsh survey and the current study, the relative prevalence  
6 of the types of harm were similar; being kept awake at night, feeling uncomfortable or anxious at a  
7 social occasion and having a serious argument were the most prevalent harms in both surveys.

8 Being a hazardous/harmful drinker increased the odds of experiencing AHTO. This is perhaps  
9 unsurprising given that drinking with other drinkers and in places where alcohol is consumed  
10 increases one's exposure to drinkers. However the association with drinking and experiencing  
11 alcohol-harm is not conclusive. A cross-sectional comparison of harm from 'heavy drinking' friends  
12 and family across five Nordic countries and Scotland reported that drinking frequency was not  
13 significantly related to experiencing harm from others but binge drinking frequency was. A higher  
14 frequency of binge drinking increased the risk of experiencing AHTO in Sweden and Norway and  
15 there was some evidence for this relationship in Finland also, but not in the other countries.<sup>7</sup> A  
16 paper using the same Norwegian data showed that the association between experiencing harm  
17 and one's own drinking was not evident for all types of harm.<sup>6</sup> Another cross-sectional survey  
18 showed a dose response relationship between how much a person drinks and experiencing  
19 AHTO, with dependent drinkers having the greatest risk.<sup>4</sup>

22 Here, age was also associated with experiencing any harm and aggressive harm. A number of  
23 studies from a range of countries have reported that being of younger age increases the risk of  
24 being harmed from another's drinking.<sup>4-7 19</sup> However, 'younger age' in this context does not always  
25 mean 'young'; one study, for example, concluded that those aged 59 or less had a higher risk of  
26 being negatively affected by a known drinker than those aged 60 and over.<sup>7</sup> A global survey of  
27 63,725 respondents aged 18-34 years reported that those aged 18-24 years were significantly  
28 more likely to experience an aggressive AHTO than those aged 30-34 or 25-29;<sup>4</sup> similar to results  
29 reported here.

32 The respondent's sex was not significantly associated with experiencing harm. The literature is  
33 mixed regarding sex as a risk factor. Women were reported to be significantly more likely to  
34 experience harm than men in Finland and Sweden but not in Denmark, Iceland, Norway or  
35 Scotland.<sup>5 6</sup> Being a woman was found to be a significant risk factor for all harms and aggressive  
36 harms using data from the Global Drug Survey.<sup>4</sup> The association of sex and experiencing harm is  
37 different for different types of harm. For example women are significantly more likely than men to  
38 experience unwanted sexual attention/sexual harassment or assault<sup>4 6</sup> whereas men are more  
39 likely to have clothing, property or other belongings damaged.<sup>4 6</sup> Survey data from the USA  
40 examined family/marriage, financial and assault harms due to drinking of a partner/spouse/family  
41 member and reported that women were more likely to report financial and family/martial harms  
42 while a higher proportion of men experienced assaults.<sup>20</sup> While examining differences in harm by  
43 sex was not the focus of this study, Supplementary Table 2 shows that such differences may exist.  
44 For example there is a clear difference between the proportion of men (2.1% 95% CI 1.6%-2.9%)  
45 and women (4.8% 95% CI 3.9%-5.8%) who reported experiencing alcohol-related emotional hurt  
46 or neglect. Such differences should be considered in future work on this topic in the United  
47 Kingdom.

50 Few studies have considered whether ethnic background is a risk factor for experiencing harm.  
51 Data from the USA demonstrate that the link between ethnicity and experience of harm is not  
52 conclusive.<sup>19 20</sup> Here, being White British was significantly associated with experiencing harm and  
53 also aggressive harm. Most minority ethnic groups in United Kingdom have higher rates of  
54 abstinence from alcohol and lower levels of drinking than people of white ethnicity.<sup>21</sup> However the  
55

1 results of the multivariate modelling presented in this study show that White British ethnicity is  
2 associated with experiencing harm and aggressive harm independently of AUDIT score.

3 Measures such as educational attainment, type of accommodation, social grade and employment  
4 status are proxy measures for socio-economic status. Literature on the effect of socio-economic  
5 status is mixed and comparisons are hindered by the multitude of different measures used in  
6 different studies. In this study social grade was not significantly associated with harm or  
7 aggressive harm in the bivariate analyses but other socio-economic variables were.  
8

9 Here findings show that experiencing harm was significantly associated with having qualifications  
10 (compared to having none) with the greatest odds being for those with a degree or higher degree.  
11 The association between education and experience of harm in the literature is mixed. Data from a  
12 Danish national survey showed no clear association between experiencing harm and education  
13 level with education categorised as low (completion up to year 11), middle (high school/technical  
14 college) and high (college or university).<sup>22</sup> Data from the Global Drug Survey showed no  
15 association between education and experience of harm or aggressive harm but there was an  
16 association between education and experiencing particular types of harm.<sup>4</sup> A comparison of  
17 northern European countries reported that a significantly higher proportion of respondents with  
18 high school/university education experienced harm than those with elementary education in four of  
19 the six countries considered.<sup>5</sup>  
20  
21

22 The current study shows that being retired lowers the odds of experiencing harm and aggressive  
23 harm compared to all other employment statuses. This association was independent of age. The  
24 odds of being harmed did not differ significantly between those who were employed and not  
25 employed. Data from two surveys conducted in the USA show that those who were unemployed  
26 were significantly more likely to experience AHTO than those who were employed.<sup>19 20</sup> Data from  
27 Denmark show that employment might be significantly associated with experiencing harm but no  
28 conclusive results were provided and the wide confidence intervals show that estimates lacked  
29 precision.<sup>22</sup>  
30  
31

32 Here, compared to those that owned their home outright, those who rented from a private landlord  
33 had significantly greater odds of experiencing harm and those who rented from the local authority  
34 or rented from a private landlord had significantly greater odds of experiencing an aggressive  
35 harm. No previous studies on the association between type of accommodation tenure and  
36 experiencing alcohol-related harm were identified. It is possible that those who rent represent a  
37 more transitory, poor and vulnerable population which increases their risk of harm. Research not  
38 specifically related to alcohol shows that those living in unstable housing (for example living on the  
39 streets, in temporary sheltered accommodation or with relatives or friends) experience relatively  
40 high rates of victimisation,<sup>23 24</sup> while data from national surveys in Great Britain show that being  
41 the victim of domestic property crimes is higher among those that rent (including those in the  
42 private rented sector) than those who own their own homes.<sup>25</sup>  
43  
44

45 Having a disability was also significantly associated with experiencing any harm and an  
46 aggressive harm. No previous studies on the association between having a disability and  
47 experiencing alcohol-related harm were identified. However there is good evidence to show that  
48 those with a disability are the victims of harm more generally including physical, sexual and  
49 intimate partner violence,<sup>26 27</sup> and financial hardship.<sup>28</sup>  
50  
51

52 Being in the family stage of life also lowered the odds of experiencing harm compared to being  
53 single. This is perhaps surprising given that the survey included questions which specifically asked  
54 about harms most likely caused by a family member. Evidence on the effect of relationships and  
55 household types is mixed and largely dependent on the way these are categorised and so cannot  
56 be directly compared.  
57  
58

1 Here we show that AHTO is associated with demographic and socio-economic factors. In the  
2 United Kingdom, there are cultural differences in drinking behaviour and some of these are  
3 reflected in our AHTO findings (such as differences between ethnic groups<sup>29</sup>). Other socio-cultural  
4 variations are not easily identified in our findings. For example, while national survey data show  
5 that people have different drinking habits across income levels (people on higher incomes tend to  
6 drink more<sup>29</sup>), neither social grade nor employment status (excepting retirement) were associated  
7 with AHTO in our study. Education, as a proxy of earning potential, was associated with AHTO,  
8 but there was no significant variation between the groups GCSE/O-level/CSE, A-level/vocational  
9 and degree/higher degree.  
10

11  
12 This study identified friends and strangers as the dominant perpetrators making up around 46% of  
13 all reports, though the perpetrator varied depending on type of harm. For example, family  
14 members made up a larger proportion of perpetrators of harms such as stopping seeing someone  
15 or having to care for someone because of their drinking. While differences by sex were not the  
16 focus of this paper, and were not investigated in detail, investigating perpetrator type by sex for  
17 aggressive harms revealed significant differences (data not reported). Women were more likely to  
18 be physically hurt and forced or pressured into something sexual by someone they were in a  
19 relationship with. In contrast, for men, strangers were the most likely perpetrators of being hurt  
20 physically and feeling threatened. These findings are in line with data from England and Wales on  
21 the relationship between offender and perpetrator,<sup>30</sup> and from previous research. A study in the  
22 US using the 2010 National Alcohol Survey reported that men were more likely to be assaulted in  
23 bar fights by strangers while women were more likely to be (sexually) assaulted by other drinkers  
24 (partners or acquaintances) within a more private setting.<sup>31</sup> The context within which drinking  
25 occurs is therefore relevant in relation to exploring differences in AHTO by sex.  
26  
27

28 While three quarters of harms were experienced less than monthly, 5.2% were experienced daily  
29 or almost daily indicating a considerable burden for of alcohol-related harm for a section of the  
30 population. The frequency of experiencing harm was largely dependent on the type of harm.  
31 Harms with the highest frequency of daily/almost daily reports were those which occurred over a  
32 prolonged period of time and/or implied frequent contact with the perpetrator such as caring for  
33 someone with a long-term health condition or disability that results from them drinking. Data from  
34 two surveys suggest that exposure to heavy drinkers is associated with poorer health, wellbeing  
35 and quality of life.<sup>32 33</sup>  
36  
37

38 To conclude, this is the largest ever survey of AHTO conducted within the United Kingdom and the  
39 first national study in England. It is clear that AHTO is relatively prevalent and that some  
40 individuals experience harm frequently. The most prevalent harms could be considered  
41 insignificant but even apparently minor harms such as sleep disruption can have an impact on  
42 health and quality of life,<sup>34</sup> particularly if experienced persistently. It is difficult to compare results  
43 with the literature because of the diversity of methods being employed. In order to support  
44 temporal and geographic comparisons it would be advantageous for studies to use a consistent  
45 methodology including the sampling and data collection methods, in addition to the harm  
46 questions. The WHO ThaiHealth project has designed a survey to measure AHTO in order to  
47 facilitate international comparison<sup>35 36</sup> but unfortunately authors were not aware of this when they  
48 began this current study. While lengthy, using this would be a good way to develop a  
49 comprehensive and consistent evidence base. However it is clear that there are differences across  
50 harm types and more detailed analysis of specific harms would be valuable for supporting  
51 remedial action from policymakers. Here we consider 'aggressive harms' as a distinctive group of  
52 harms; future research could consider other harm groupings in order to provide a more detailed  
53 assessment of specific harm types. Research on the types of alcohol consumption patterns that  
54 increase the likelihood of experiencing AHTO in the United Kingdom would be valuable.  
55 Understanding what puts younger adults at increased risk could be a useful focus for future  
56  
57  
58  
59  
60

research as it might identify the contextual factors which make experiencing harm more likely. Further focus on the differences in harm by sex would also be advantageous as there is little data on this in relation to the United Kingdom. Policy to address AHTO is less well developed than policy that seeks to address harms to the drinker; exceptions include crime and violence and harm to the unborn foetus which have been included in previous Government's Alcohol Strategy.<sup>37</sup> Given that AHTO research is in its early stages it is premature to advocate a detailed policy response but results presented here will be of interest to policy makers to help understand the wider impact of other people's drinking.

## ACKNOWLEDGEMENTS

The authors would like to thank the alcohol expert forum of the five nations Public Health Peer Network for initiating this work and to PHE for funding it. Thanks also to the following people in PHE: Craig Timpson for quality assuring the analyses, Helen Outhwaite for help with searching for literature, Robyn Burton and Helen Willey for their input into early conversations about methods. Thanks to Dr Jamie Brown, University College London, for permitting the harm to others questions to be appended to the alcohol toolkit survey and for his subsequent support with interpretation of the alcohol toolkit survey questions. Thanks to Ipsos MORI for delivering the survey, in particular Stuart Smedley. Finally, thanks for the four reviewers for their comments on this paper.

## COMPETING INTERESTS

None declared.

## FUNDING

The work was funded by Public Health England.

## AUTHORS' CONTRIBUTIONS

CB provided day to day management of the study, helped design the questionnaire and wrote the first draft. DB did the analysis and helped to write the first draft. JM undertook a review of the literature. KS was involved with the initiation, helped design the questionnaire and provided statistical support. CP was involved with the initiation of the study. CH was involved with the initiation of the study and helped design the questionnaire. All authors reviewed and helped to revise successive drafts and approved the final version of the manuscript.

## DATA SHARING AGREEMENT

Sharing of data will be considered by PHE and UCL on a case-by-case basis. Please contact the lead author for further details.

## REFERENCES

1. World Health Organization. Global status report on alcohol and health. Geneva: World Health Organization, 2014.
2. World Health Organization. Global strategy to reduce the harmful use of alcohol. Geneva: World Health Organization, 2010.
3. Office for National Statistics. Chapter 5: Violent crime and sexual offences - alcohol-related violence. London: Office for National Statistics, 2015.
4. Bellis M, Quigg Z, Hughes K, et al. Harm from other people's drinking: an international survey of their occurrence, impacts on feeling safe and legislation relating to their control. *BMJ Open* 2015;5
5. Moan I, Storvoll E, Sundin E, et al. Experienced harm from other people's drinking: a comparison of Northern European countries. *Substance Abuse Research and Treatment* 2015;9(S(2)):45-57.
6. Storvoll E, Moan I, Lund I. Negative consequences of other people's drinking: prevalence, perpetrators and locations. *Drug and Alcohol Review* 2016;2016
7. Ramstedt M, Sundin E, Moan I, et al. Harm experienced from the heavy drinking of family and friends in the general population: A comparative study of six northern European countries. *Substance Abuse Research and Treatment* 2015;9(S2)
8. Burton R, Henn C, Lavoie D, et al. A rapid evidence review of the effectiveness and cost-effectiveness of alcohol policies: an English perspective. *The Lancet* 2016 doi: [http://dx.doi.org/10.1016/S0140-6736\(16\)32420-5](http://dx.doi.org/10.1016/S0140-6736(16)32420-5)
9. Beard E, Brown J, West R, et al. Protocol for a national monthly survey of alcohol use in England with 6-month follow up: 'The Alcohol Toolkit Survey'. *BMC Public Health* 2015;15:230.
10. Hope A, Curran J, Bell G, et al. Unrecognised and under-reported: the impact of alcohol on people other than the drinker in Scotland. Glasgow: Alcohol Focus Scotland, 2013.
11. Quigg Z, Bellis AM, Grey H, et al. Alcohol's harms to others: the harms from other people's alcohol consumption in Wales. Cardiff: Public Health Wales, 2016.
12. Gell L, Ally A, Buykx P, et al. Alcohol's harm to others. Sheffield: The University of Sheffield, 2015.
13. Barbor T, Higgins-Biddle J, Saunders J, et al. AUDIT: The alcohol use disorders identification test, guidelines for use in primary care. 2nd edition. Geneva: World Health Organization, 2001.
14. StataCorp. Stata survey data reference manual: release 13. Texas: StataCorp LP, 2013.
15. Rao J, Scott A. On chi-squared tests for multiway contingency tables with cell proportions estimated from survey data. *Annals of Statistics* 1981;12:46-60.
16. Johnson T. Sources of error in substance use prevalence surveys. *International Scholarly Research Notices* 2014;2014 doi: <http://dx.doi.org/10.1155/2014/923290>
17. Office for National Statistics. Estimates of violent incidents where the victim believed the offender(s) to be under the influence of alcohol or drugs in England and Wales, year ending March 2006 to year ending March 2016 Crime Survey for England and Wales, 2017.
18. Greenfield T, Midanik L, Rogers J. Effects of telephone versus face-to-face interview models on reports of alcohol consumption. *Addiction* 2000;95(2):277-84.
19. Karriker-Jaffe K, Greenfield T. Gender differences in associations of neighbourhood disadvantage with alcohol's harms to others: a cross-sectional study from the United States. *Drug and Alcohol Review* 2014;33(3):296-303.
20. Greenfield T, Karriker-Jaffe K, Kaplan L, et al. Trends in alcohol's harms to others (AHTO) and co-occurrence of family-related AHTO: the four US National Alcohol Surveys, 2000-2015. *Substance Abuse Research and Treatment* 2015;2015(9(S2)):23-31.
21. Hurcombe R, Bayley M, Goodman A. Ethnicity and alcohol: a review of the UK literature. York: Joseph Rowntree Foundation, 2010.



22. Seid A, Grittner U, Greenfield T, et al. To cause harm and to be harmed by others: new perspectives on alcohol's harm to others. *Substance Abuse Research and Treatment* 2015;2015(S2):13-22.
23. Kushel M, Evans J, Perry S. Victimization among homeless and marginally housed persons. *Archives of Internal Medicine* 2003;163(20):2492-99.
24. Nyamathi A, Leake B, Gelberg L. Sheltered versus nonsheltered homeless women: Differences in health, behavior, victimisation and utilization of care. *Journal of General Internal Medicine* 2000;15(8):565-72.
25. Farrall S, Hay C, Gray E. Thatcherite ideology, housing tenure and crime: The socio-spatial consequences of the right to buy for domestic property crime. *The British Journal of Criminology* 2016;56(1):1235-52.
26. Hughes K, Bellis AM, Jones L, et al. Prevalence and risk of violence against adults with disabilities: a systematic review and meta-analysis of observational studies. *The Lancet* 2012;379(9826):1621-29.
27. Krnjacki L, Emerson E, Llewellyn G, et al. Prevalence and risk of violence against people with and without disabilities: Findings from an Australian population-based study. *Violence and Trauma* 2015;40(1):16-21.
28. Frier A, Barnett F, Devine S, et al. Understanding disability and the 'social determinants of health': how does disability affect people's social determinants of health? *Disability and Rehabilitation* 2016;40(5):538-47.
29. Office for National Statistics. Adult drinking habits in Great Britain: 2017. Newport: Office for National Statistics, 2018.
30. Office for National Statistics. Overview of violent crime and sexual offences. Newport: Office for National Statistics, 2016.
31. Kaplan L, Karriker-Jaffe J, Greenfield K. Drinking context and alcohol's harm from others among men and women in the US National Alcohol Survey. *Journal of Substance Use* 2017;22(4):412-18.
32. Casswell S, You R, Huckle T. Alcohol's harm to others: reduced wellbeing and health status for those with heavy drinkers in their lives. *Addiction* 2011;106(6):1087-94.
33. Jiang H, Callinan S, Laslett A, et al. Correlates of caring for the drinkers and others among those harmed by another's drinking. *Drug and Alcohol Review* 2015;34:162-69.
34. Muzet A. Environmental noise, sleep and health. *Sleep medicine reviews* 2007;12(2):135-42.
35. World Health Organization/ThaiHealth International Collaboration Research Project. The Harm to Others from Drinking. Geneva: World Health Organization, 2012.
36. Callinan S, Laslett A, Rekve D, et al. Alcohol's harm to others: An international collaborative project. *International Journal of Alcohol and Drug Research* 2016;5(2):25-32.
37. HM Government. The Government's Alcohol Strategy. London: HM Government, 2012.

1  
2  
3 Figure Legends  
4

5 Figure 1: Perpetrators as a percentage of all reported harms to others,  
6 weighted data  
7

8 Weighted N = 2,522 (represents the total number of perpetrators across all harms).  
9  
10

11  
12 Figure 2: Frequency of all reported harms to others, weighted data  
13

14 Weighted N = 2,052 (represents the total number of harms across all individuals).  
15  
16  
17  
18  
19  
20  
21  
22  
23  
24  
25  
26  
27  
28  
29  
30  
31  
32  
33  
34  
35  
36  
37  
38  
39  
40  
41  
42  
43  
44  
45  
46  
47  
48  
49  
50  
51  
52  
53  
54  
55  
56  
57  
58  
59  
60

For peer review only

1  
2  
3  
4  
5  
6  
7  
8  
9  
10  
11  
12  
13  
14  
15  
16  
17  
18  
19  
20  
21  
22  
23  
24  
25  
26  
27  
28  
29  
30  
31  
32  
33  
34  
35  
36  
37  
38  
39  
40  
41  
42  
43  
44  
45  
46  
47  
48  
49  
50  
51  
52  
53  
54  
55  
56  
57  
58  
59  
60



Figure 1: Perpetrators as a percentage of all reported harms to others

364x149mm (300 x 300 DPI)

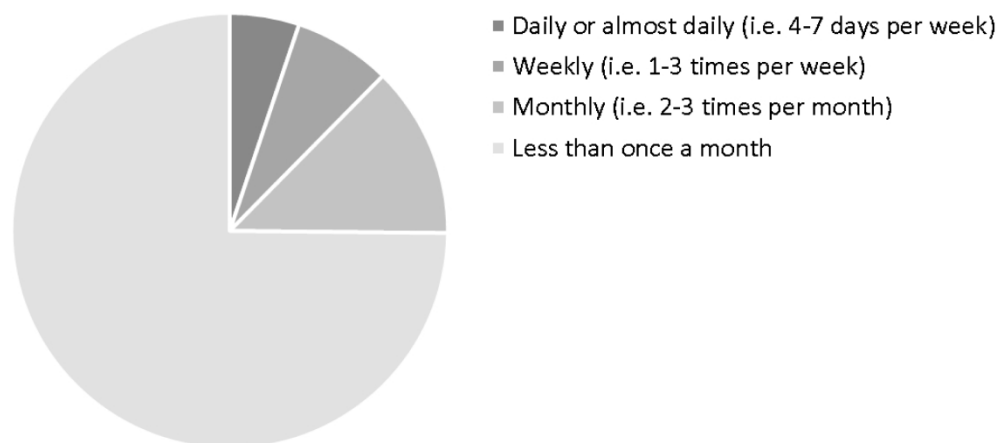

Figure 2: Frequency of all reported harms to others

292x132mm (300 x 300 DPI)

Supplementary Table 1: Examination of missing data, non-weighted data

| Independent variable                        | Included (AHTO questions answered) |      | Excluded (AHTO questions not answered) |     | p value |
|---------------------------------------------|------------------------------------|------|----------------------------------------|-----|---------|
|                                             | N                                  | %    | N                                      | %   |         |
| <i>Sex (N = 5,068)</i>                      |                                    |      |                                        |     |         |
| Female                                      | 2,397                              | 96.9 | 76                                     | 3.1 | 0.023   |
| Male                                        | 2,484                              | 95.7 | 111                                    | 4.3 |         |
| <i>Age band (N = 5,608)</i>                 |                                    |      |                                        |     |         |
| 16-24                                       | 789                                | 97.4 | 21                                     | 2.6 | 0.111   |
| 25-44                                       | 1,460                              | 96.3 | 56                                     | 3.7 |         |
| 45-64                                       | 1,435                              | 95.5 | 68                                     | 4.5 |         |
| 65+                                         | 1,197                              | 96.6 | 42                                     | 3.4 |         |
| <i>Broad ethnic group (N = 5,040)</i>       |                                    |      |                                        |     |         |
| White British                               | 3,603                              | 96.2 | 142                                    | 3.8 | 0.125   |
| Other White groups                          | 393                                | 98.3 | 7                                      | 1.8 |         |
| Black groups                                | 262                                | 95.6 | 12                                     | 4.4 |         |
| Asian groups                                | 539                                | 97.3 | 15                                     | 2.7 |         |
| Other groups                                | 63                                 | 94.0 | 4                                      | 6.0 |         |
| <i>Life stage (N = 5,067)</i>               |                                    |      |                                        |     |         |
| Single                                      | 716                                | 97.4 | 19                                     | 2.6 | 0.150   |
| Pre-family                                  | 260                                | 95.9 | 11                                     | 4.1 |         |
| Family                                      | 1,473                              | 96.7 | 50                                     | 3.3 |         |
| Post family                                 | 2,431                              | 95.8 | 107                                    | 4.2 |         |
| <i>Education (5,039)</i>                    |                                    |      |                                        |     |         |
| No qualifications                           | 866                                | 97.2 | 25                                     | 2.8 | 0.075   |
| GCSE/O-level/CSE                            | 952                                | 95.9 | 41                                     | 4.1 |         |
| A-level/vocational                          | 1,334                              | 97.2 | 39                                     | 2.8 |         |
| Degree/higher degree                        | 1,335                              | 95.4 | 64                                     | 4.6 |         |
| Other/still studying                        | 368                                | 96.1 | 15                                     | 3.9 |         |
| <i>Social grade<sup>†</sup> (N = 5,068)</i> |                                    |      |                                        |     |         |
| AB                                          | 1,081                              | 96.2 | 43                                     | 3.8 | 0.134   |
| C1                                          | 1,554                              | 95.8 | 68                                     | 4.2 |         |
| C2                                          | 947                                | 96.7 | 32                                     | 3.3 |         |
| D                                           | 757                                | 97.7 | 18                                     | 2.3 |         |
| E                                           | 542                                | 95.4 | 26                                     | 4.6 |         |
| <i>Tenure (N = 5,027)</i>                   |                                    |      |                                        |     |         |
| Owned outright                              | 1,729                              | 97.5 | 45                                     | 2.5 | <0.001  |
| Bought on a mortgage                        | 1,124                              | 95.4 | 54                                     | 4.6 |         |
| Rented from local authority                 | 568                                | 95.5 | 27                                     | 4.5 |         |
| Rented from private landlord                | 1,029                              | 97.0 | 32                                     | 3.0 |         |
| Other                                       | 392                                | 93.6 | 27                                     | 6.4 |         |
| <i>Disability (N = 4,956)</i>               |                                    |      |                                        |     |         |
| Considers self disabled                     | 571                                | 94.4 | 34                                     | 5.6 | 0.002   |
| Not disabled                                | 4,213                              | 96.8 | 138                                    | 3.2 |         |
| <i>Employment status (N = 5,066)</i>        |                                    |      |                                        |     |         |
| Employed                                    | 2,306                              | 95.9 | 98                                     | 4.1 | 0.121   |
| Unemployed                                  | 237                                | 98.8 | 3                                      | 1.3 |         |
| Economically inactive                       | 1,009                              | 96.1 | 41                                     | 3.9 |         |
| Retired                                     | 1,327                              | 96.7 | 45                                     | 3.3 |         |
| <i>AUDIT(N = 5,044)</i>                     |                                    |      |                                        |     |         |
| Not hazardous/harmful drinking              | 4,215                              | 96.7 | 142                                    | 3.3 | 0.003   |
| Hazardous/harmful drinking                  | 649                                | 94.5 | 38                                     | 5.5 |         |

N = 5,068 (totals for independent variables will not equal 5,068 where the person did not provide responses to the AHTO questions and the independent variable.

<sup>†</sup>AB is higher managerial, administrative and professional and Intermediate managerial, administrative and professional; C1 is supervisory, clerical and junior managerial, administrative and professional; C2 is skilled manual workers; D is semi-skilled and unskilled manual workers; and E is state pensioners, casual and lowest grade workers, unemployed with state benefits only.

Supplementary Table 2: Prevalence of harm in the previous 12 months by sex, weighted data

| Harm type                                                                                                                                               | Number of respondents who experienced harm |       | Percentage of respondents who experienced harm |                |
|---------------------------------------------------------------------------------------------------------------------------------------------------------|--------------------------------------------|-------|------------------------------------------------|----------------|
|                                                                                                                                                         | Men                                        | Women | Men (95% CI)                                   | Women (95% CI) |
| Been kept awake due to noise or disruption                                                                                                              | 177                                        | 213   | 7.5 (6.3-8.8)                                  | 8.5 (7.4-9.8)  |
| Felt uncomfortable or anxious at a social occasion (e.g. a party)                                                                                       | 160                                        | 171   | 6.8 (5.7-8.0)                                  | 6.8 (5.8-8.0)  |
| Had a serious argument that did NOT include physical violence                                                                                           | 129                                        | 147   | 5.4 (4.6-6.6)                                  | 5.8 (4.9-6.9)  |
| Been let down by someone due to them failing to do something that I was counting on them to do because of their drinking                                | 82                                         | 92    | 3.5 (2.7-4.4)                                  | 3.7 (3.0-4.6)  |
| Been emotionally hurt or neglected                                                                                                                      | 50                                         | 120   | 2.1 (1.6-2.9)                                  | 4.8 (3.9-5.8)  |
| Felt physically threatened                                                                                                                              | 95                                         | 69    | 4.0 (3.2-5.1)                                  | 2.7 (2.1-3.6)  |
| Had to stop seeing or being in contact with someone because of their drinking                                                                           | 47                                         | 73    | 2.0 (1.4-2.7)                                  | 2.9 (2.3-3.7)  |
| Had to contact the police                                                                                                                               | 56                                         | 62    | 2.4 (1.8-3.2)                                  | 2.5 (1.9-3.2)  |
| Had someone break or damage something that mattered to me                                                                                               | 52                                         | 43    | 2.2 (1.6-3.0)                                  | 1.7 (1.2-2.4)  |
| Been physically hurt due to them assaulting me or acting violently                                                                                      | 50                                         | 42    | 2.1 (1.5-2.9)                                  | 1.7 (1.2-2.3)  |
| Been put at risk in a car when someone was driving after drinking                                                                                       | 37                                         | 38    | 1.6 (1.1-2.3)                                  | 1.5 (1.1-2.1)  |
| Felt genuinely concerned that they may cause harm to my children or someone else's children                                                             | 18                                         | 43    | 0.7 (0.4-1.3)                                  | 1.7 (1.3-2.4)  |
| Had to spend my personal time caring for a person with a long term health condition or disability that resulted from their current or previous drinking | 24                                         | 33    | 1.0 (0.7-1.6)                                  | 1.3 (0.9-1.9)  |
| Been physically hurt due to them accidentally injuring me (e.g. by falling on me)                                                                       | 16                                         | 37    | 0.7 (0.4-1.2)                                  | 1.5 (1.0-2.1)  |
| Had money that would have improved the quality of my life spent on their alcohol-related purchases                                                      | 18                                         | 32    | 0.8 (0.5-1.2)                                  | 1.3 (0.9-1.9)  |
| Drank alcohol myself in order to cope with the problems caused by their drinking                                                                        | 19                                         | 14    | 0.8 (0.5-1.3)                                  | 0.5 (0.3-1.0)  |
| Felt forced or pressured into sex or something sexual                                                                                                   | 12                                         | 20    | 0.5 (0.3-0.9)                                  | 0.8 (0.5-1.3)  |
| Had to move out of my usual place of residence and stay somewhere else                                                                                  | 9                                          | 16    | 0.4 (0.2-0.8)                                  | 0.6 (0.4-1.1)  |

Weighted N = 4,874.

Supplementary Table 3: Perpetrator of harm by harm type (continued on the next page), weighted data

| Harm type                                                                                                                                               |     | A friend |      |           | A stranger |      |           | Someone you were in a relationship with (e.g. wife/husband, partner) who you lived with |      |           | A family member you did not live with |      |           |
|---------------------------------------------------------------------------------------------------------------------------------------------------------|-----|----------|------|-----------|------------|------|-----------|-----------------------------------------------------------------------------------------|------|-----------|---------------------------------------|------|-----------|
|                                                                                                                                                         |     | n        | %    | 95% CI    | n          | %    | 95% CI    | n                                                                                       | %    | 95% CI    | n                                     | %    | 95% CI    |
| Been kept awake due to noise or disruption                                                                                                              | No  | 314      | 84.8 | 80.3-88.4 | 187        | 50.5 | 44.7-56.2 | 346                                                                                     | 93.3 | 89.8-95.7 | 359                                   | 97.0 | 94.5-98.4 |
|                                                                                                                                                         | Yes | 56       | 15.2 | 11.6-19.7 | 183        | 49.5 | 43.8-55.3 | 25                                                                                      | 6.7  | 4.3-10.2  | 11                                    | 3.0  | 1.6-5.5   |
| Felt uncomfortable or anxious at a social occasion (e.g. a party)                                                                                       | No  | 205      | 67.2 | 61.0-72.8 | 200        | 65.6 | 59.3-71.5 | 280                                                                                     | 91.7 | 87.4-94.6 | 271                                   | 88.9 | 84.3-92.3 |
|                                                                                                                                                         | Yes | 100      | 32.8 | 27.2-39.0 | 105        | 34.4 | 28.5-40.7 | 25                                                                                      | 8.3  | 5.4-12.6  | 34                                    | 11.1 | 7.7-15.7  |
| Had a serious argument that did NOT include physical violence                                                                                           | No  | 167      | 64.3 | 57.5-70.5 | 225        | 86.8 | 81.4-90.8 | 199                                                                                     | 76.9 | 70.4-82.4 | 216                                   | 83.5 | 77.7-88.0 |
|                                                                                                                                                         | Yes | 93       | 35.7 | 29.5-42.6 | 34         | 13.2 | 9.2-18.6  | 60                                                                                      | 23.1 | 17.6-29.6 | 43                                    | 16.5 | 12.0-22.3 |
| Been let down by someone due to them failing to do something that I was counting on them to do because of their drinking                                | No  | 95       | 56.6 | 48.1-64.7 | 162        | 96.4 | 91.9-98.5 | 136                                                                                     | 81.1 | 73.5-86.9 | 137                                   | 81.4 | 74.1-87.0 |
|                                                                                                                                                         | Yes | 73       | 43.5 | 35.4-51.9 | 6          | 3.6  | 1.5-8.1   | 32                                                                                      | 18.9 | 13.1-26.5 | 31                                    | 18.6 | 13.0-25.9 |
| Been emotionally hurt or neglected                                                                                                                      | No  | 115      | 72.5 | 64.0-79.6 | 150        | 94.3 | 88.7-97.2 | 121                                                                                     | 76.1 | 67.7-82.9 | 116                                   | 72.7 | 64.2-79.8 |
|                                                                                                                                                         | Yes | 44       | 27.6 | 20.5-36.0 | 9          | 5.7  | 2.8-11.3  | 38                                                                                      | 23.9 | 17.1-32.3 | 43                                    | 27.3 | 20.2-35.8 |
| Felt physically threatened                                                                                                                              | No  | 130      | 84.6 | 77.0-90.0 | 61         | 39.5 | 30.9-48.8 | 136                                                                                     | 88.5 | 82.2-92.8 | 145                                   | 94.5 | 89.6-97.2 |
|                                                                                                                                                         | Yes | 24       | 15.4 | 1.0-23.0  | 93         | 60.5 | 51.2-69.1 | 18                                                                                      | 11.5 | 7.2-17.8  | 8                                     | 5.5  | 2.8-10.5  |
| Had to stop seeing or being in contact with someone because of their drinking                                                                           | No  | 71       | 62.4 | 52.3-71.6 | 109        | 95.6 | 88.8-98.4 | 92                                                                                      | 80.6 | 71.2-87.4 | 86                                    | 75.9 | 66.1-83.6 |
|                                                                                                                                                         | Yes | 43       | 37.6 | 28.4-47.7 | 5          | 4.4  | 1.6-11.2  | 22                                                                                      | 19.4 | 12.6-28.8 | 27                                    | 24.1 | 16.4-33.9 |
| Had to contact the police                                                                                                                               | No  | 96       | 89.5 | 81.3-94.3 | 59         | 55.3 | 44.3-65.8 | 93                                                                                      | 87.0 | 79.0-92.2 | 95                                    | 88.8 | 79.1-94.3 |
|                                                                                                                                                         | Yes | 11       | 10.5 | 5.7-18.7  | 48         | 44.7 | 34.2-55.7 | 14                                                                                      | 13.0 | 7.8-21.0  | 12                                    | 11.2 | 5.7-20.9  |
| Had someone break or damage something that mattered to me                                                                                               | No  | 50       | 55.8 | 43.0-67.9 | 82         | 90.9 | 82.1-95.6 | 75                                                                                      | 82.8 | 72.5-89.8 | 82                                    | 90.8 | 82.1-95.5 |
|                                                                                                                                                         | Yes | 40       | 44.2 | 32.1-57.0 | 8          | 9.1  | 4.4-17.9  | 16                                                                                      | 17.2 | 10.2-27.5 | 8                                     | 9.2  | 4.5-17.9  |
| Been physically hurt due to them assaulting me or acting violently                                                                                      | No  | 71       | 85.4 | 74.7-92.0 | 57         | 68.5 | 56.4-78.5 | 66                                                                                      | 79.8 | 69.2-87.4 | 73                                    | 88.1 | 76.8-94.3 |
|                                                                                                                                                         | Yes | 12       | 14.7 | 8.0-25.3  | 26         | 31.5 | 21.5-43.6 | 17                                                                                      | 20.2 | 12.6-30.8 | 10                                    | 11.9 | 5.7-23.2  |
| Been put at risk in a car when someone was driving after drinking                                                                                       | No  | 46       | 66.7 | 54.0-77.4 | 52         | 75.5 | 61.6-85.6 | 62                                                                                      | 89.5 | 78.5-95.2 | 66                                    | 96.1 | 87.9-98.8 |
|                                                                                                                                                         | Yes | 23       | 33.3 | 22.6-46.0 | 17         | 24.5 | 14.4-38.4 | 7                                                                                       | 10.5 | 4.8-21.5  | 3                                     | 4.0  | 1.2-12.1  |
| Felt genuinely concerned that they may cause harm to my children or someone else's children                                                             | No  | 47       | 91.1 | 77.3-96.9 | 39         | 77.1 | 62.5-87.2 | 45                                                                                      | 87.4 | 75.3-94.0 | 41                                    | 80.9 | 65.9-90.2 |
|                                                                                                                                                         | Yes | 5        | 8.9  | 3.1-22.7  | 12         | 22.9 | 12.8-37.5 | 6                                                                                       | 12.6 | 6.0-24.7  | 10                                    | 19.2 | 9.8-34.1  |
| Had to spend my personal time caring for a person with a long term health condition or disability that resulted from their current or previous drinking | No  | 41       | 75.7 | 60.0-86.6 | 51         | 94.6 | 85.4-98.1 | 47                                                                                      | 87.5 | 73.5-94.6 | 34                                    | 62.4 | 47.2-75.5 |
|                                                                                                                                                         | Yes | 13       | 24.3 | 13.4-40.0 | 3          | 5.4  | 1.9-14.6  | 7                                                                                       | 12.5 | 5.4-26.5  | 20                                    | 37.6 | 24.5-52.8 |
| Been physically hurt due to them accidentally injuring me (e.g. by falling on me)                                                                       | No  | 30       | 59.5 | 43.6-73.5 | 32         | 62.5 | 46.3-76.2 | 44                                                                                      | 87.2 | 74.1-94.2 | 44                                    | 86.6 | 72.0-94.2 |
|                                                                                                                                                         | Yes | 21       | 40.5 | 26.5-56.4 | 19         | 37.6 | 23.8-53.7 | 7                                                                                       | 12.8 | 5.8-25.9  | 7                                     | 13.4 | 5.8-28.0  |
| Had money that would have improved the quality of my life spent on their alcohol-related purchases                                                      | No  | 29       | 63.0 | 46.6-76.8 | 44         | 97.1 | 80.6-99.6 | 30                                                                                      | 66.5 | 49.1-80.4 | 40                                    | 89.1 | 72.6-96.2 |
|                                                                                                                                                         | Yes | 17       | 37.0 | 23.2-53.4 | 1          | 3.0  | 0.4-19.4  | 15                                                                                      | 33.5 | 19.6-50.9 | 5                                     | 10.9 | 3.8-27.4  |
| Drank alcohol myself in order to cope with the problems caused by their drinking                                                                        | No  | 22       | 75.7 | 54.3-89.1 | 27         | 93.4 | 70.9-98.8 | 22                                                                                      | 76.9 | 53.4-90.6 | 25                                    | 86.0 | 62.0-95.9 |
|                                                                                                                                                         | Yes | 7        | 24.3 | 10.9-45.7 | 2          | 6.6  | 1.2-29.1  | 7                                                                                       | 23.1 | 9.4-46.6  | 4                                     | 14.0 | 4.1-38.0  |
| Felt forced or pressured into sex or something sexual                                                                                                   | No  | 22       | 80.3 | 58.5-92.2 | 22         | 81.0 | 55.8-93.5 | 21                                                                                      | 76.7 | 54.0-90.2 | 26                                    | 95.8 | 72.8-99.5 |
|                                                                                                                                                         | Yes | 5        | 19.7 | 7.8-41.5  | 5          | 19.0 | 6.5-44.2  | 6                                                                                       | 23.3 | 9.8-46.0  | 1                                     | 4.2  | 0.5-27.2  |
| Had to move out of my usual place of residence and stay somewhere else                                                                                  | No  | 18       | 82.9 | 62.3-93.4 | 20         | 94.1 | 74.7-98.8 | 12                                                                                      | 55.3 | 31.0-77.3 | 20                                    | 95.4 | 80.5-99.0 |
|                                                                                                                                                         | Yes | 4        | 17.1 | 6.6-37.7  | 1          | 5.9  | 1.2-25.3  | 10                                                                                      | 44.7 | 22.7-69.0 | 1                                     | 4.6  | 1.0-19.5  |

Supplementary Table 3: Perpetrator of harm by harm type (continued from the previous page), weighted data

| Harm type                                                                                                                                               |     | Someone else you know |      |           | Another family member you lived with |      |           | Someone else you lived with |       |            | Someone you were in a relationship with (e.g. wife/husband, partner) who you did not live with |      |           | A work colleague |       |           |
|---------------------------------------------------------------------------------------------------------------------------------------------------------|-----|-----------------------|------|-----------|--------------------------------------|------|-----------|-----------------------------|-------|------------|------------------------------------------------------------------------------------------------|------|-----------|------------------|-------|-----------|
|                                                                                                                                                         |     | n                     | %    | 95% CI    | n                                    | %    | 95% CI    | n                           | %     | 95% CI     | n                                                                                              | %    | 95% CI    | n                | %     | 95% CI    |
| Been kept awake due to noise or disruption                                                                                                              | No  | 296                   | 80.1 | 75.0-84.3 | 348                                  | 94.1 | 90.8-96.3 | 325                         | 87.7  | 83.7-90.9  | 362                                                                                            | 97.7 | 95.2-98.9 | 365              | 98.5  | 96.3-99.4 |
|                                                                                                                                                         | Yes | 74                    | 20.0 | 15.7-25.1 | 22                                   | 5.9  | 3.7-9.2   | 45                          | 12.3  | 9.1-16.3   | 8                                                                                              | 2.3  | 1.1-4.8   | 6                | 1.5   | 0.6-3.8   |
| Felt uncomfortable or anxious at a social occasion (e.g. a party)                                                                                       | No  | 264                   | 86.7 | 81.8-90.4 | 299                                  | 97.8 | 95.2-99.0 | 294                         | 96.5  | 93.0-98.3  | 297                                                                                            | 97.3 | 94.5-98.7 | 276              | 90.6  | 86.0-93.8 |
|                                                                                                                                                         | Yes | 41                    | 13.4 | 9.6-18.3  | 7                                    | 2.2  | 1.0-4.9   | 11                          | 3.5   | 1.8-7.0    | 8                                                                                              | 2.7  | 1.3-5.5   | 29               | 9.4   | 6.2-14.1  |
| Had a serious argument that did NOT include physical violence                                                                                           | No  | 233                   | 90.0 | 85.0-93.4 | 240                                  | 92.7 | 88.6-95.3 | 244                         | 94.1  | 90.2-96.5  | 240                                                                                            | 92.7 | 89.0-95.2 | 249              | 96.2  | 92.5-98.1 |
|                                                                                                                                                         | Yes | 26                    | 10.0 | 6.6-15.0  | 19                                   | 7.3  | 4.7-11.4  | 15                          | 5.9   | 3.5-9.9    | 19                                                                                             | 7.3  | 4.8-11.0  | 10               | 3.8   | 1.9-7.5   |
| Been let down by someone due to them failing to do something that I was counting on them to do because of their drinking                                | No  | 156                   | 93.0 | 86.7-96.5 | 156                                  | 92.8 | 87.8-95.8 | 157                         | 93.7  | 87.6-96.9  | 160                                                                                            | 95.2 | 90.7-97.6 | 150              | 89.4  | 82.1-94.0 |
|                                                                                                                                                         | Yes | 12                    | 7.0  | 3.5-13.3  | 12                                   | 7.2  | 4.2-12.2  | 11                          | 6.4   | 3.1-12.4   | 8                                                                                              | 4.8  | 2.4-9.4   | 18               | 10.6  | 6.1-17.9  |
| Been emotionally hurt or neglected                                                                                                                      | No  | 152                   | 95.7 | 91.1-97.9 | 146                                  | 92.0 | 86.4-95.4 | 147                         | 92.5  | 85.9-96.1  | 137                                                                                            | 85.9 | 78.7-91.0 | 154              | 97.0  | 91.9-98.9 |
|                                                                                                                                                         | Yes | 7                     | 4.3  | 2.1-8.9   | 13                                   | 8.0  | 4.6-13.6  | 12                          | 7.6   | 3.9-14.1   | 22                                                                                             | 14.1 | 9.1-21.3  | 5                | 3.0   | 1.1-8.1   |
| Felt physically threatened                                                                                                                              | No  | 132                   | 85.7 | 78.0-91.1 | 148                                  | 96.7 | 92.0-98.6 | 153                         | 99.6  | 97.4-100.0 | 149                                                                                            | 97.0 | 92.4-98.8 | 151              | 98.2  | 93.0-99.6 |
|                                                                                                                                                         | Yes | 22                    | 14.3 | 8.9-22.0  | 5                                    | 3.3  | 1.4-8.0   | 1                           | 0.4   | 0.1-2.6    | 5                                                                                              | 3.0  | 1.2-7.6   | 3                | 1.8   | 0.4-7.0   |
| Had to stop seeing or being in contact with someone because of their drinking                                                                           | No  | 102                   | 89.5 | 82.3-94.0 | 106                                  | 92.7 | 85.9-96.3 | 109                         | 95.8  | 86.4-98.8  | 107                                                                                            | 93.9 | 87.2-97.2 | 108              | 95.0  | 87.1-98.1 |
|                                                                                                                                                         | Yes | 12                    | 10.5 | 6.0-17.7  | 8                                    | 7.3  | 3.7-14.1  | 5                           | 4.2   | 1.2-13.6   | 7                                                                                              | 6.1  | 2.8-12.8  | 6                | 5.0   | 1.9-12.9  |
| Had to contact the police                                                                                                                               | No  | 87                    | 81.5 | 71.2-88.7 | 101                                  | 94.8 | 88.4-97.8 | 105                         | 98.4  | 93.2-99.6  | 105                                                                                            | 97.8 | 93.1-99.3 | 106              | 98.7  | 91.3-99.8 |
|                                                                                                                                                         | Yes | 20                    | 18.5 | 11.3-28.8 | 6                                    | 5.2  | 2.2-11.6  | 2                           | 1.6   | 0.4-6.8    | 2                                                                                              | 2.2  | 0.7-6.9   | 1                | 1.3   | 0.2-8.7   |
| Had someone break or damage something that mattered to me                                                                                               | No  | 81                    | 89.9 | 80.6-95.0 | 80                                   | 88.2 | 78.4-93.9 | 87                          | 95.7  | 88.5-98.5  | 87                                                                                             | 96.0 | 88.6-98.6 | 89               | 97.8  | 90.6-99.5 |
|                                                                                                                                                         | Yes | 9                     | 10.1 | 5.0-19.4  | 11                                   | 11.8 | 6.1-21.6  | 4                           | 4.3   | 1.5-11.5   | 4                                                                                              | 4.0  | 1.4-11.4  | 2                | 2.2   | 0.5-9.4   |
| Been physically hurt due to them assaulting me or acting violently                                                                                      | No  | 74                    | 89.3 | 79.5-94.7 | 76                                   | 90.8 | 80.5-95.9 | 82                          | 97.9  | 93.2-99.4  | 79                                                                                             | 95.0 | 86.3-98.3 | 79               | 94.4  | 79.9-98.6 |
|                                                                                                                                                         | Yes | 9                     | 10.7 | 5.3-20.5  | 8                                    | 9.2  | 4.1-19.6  | 2                           | 2.1   | 0.6-6.8    | 4                                                                                              | 5.0  | 1.7-13.7  | 5                | 5.6   | 1.4-20.1  |
| Been put at risk in a car when someone was driving after drinking                                                                                       | No  | 59                    | 85.3 | 74.7-91.9 | 63                                   | 90.4 | 79.6-95.8 | 69                          | 99.1  | 93.7-99.9  | 65                                                                                             | 93.6 | 83.4-97.7 | 66               | 95.0  | 84.4-98.5 |
|                                                                                                                                                         | Yes | 10                    | 14.7 | 8.1-25.3  | 7                                    | 9.6  | 4.2-20.4  | 1                           | 0.9   | 0.1-6.3    | 4                                                                                              | 6.4  | 2.3-16.6  | 3                | 5.0   | 1.5-15.6  |
| Felt genuinely concerned that they may cause harm to my children or someone else's children                                                             | No  | 36                    | 70.7 | 54.6-82.9 | 48                                   | 94.1 | 82.4-98.2 | 50                          | 98.6  | 90.0-99.8  | 49                                                                                             | 96.9 | 87.6-99.3 | 49               | 95.8  | 74.8-99.4 |
|                                                                                                                                                         | Yes | 15                    | 29.3 | 17.1-45.4 | 3                                    | 5.9  | 1.8-17.6  | 1                           | 1.4   | 0.2-10.0   | 2                                                                                              | 3.1  | 0.7-12.4  | 2                | 4.2   | 0.6-25.2  |
| Had to spend my personal time caring for a person with a long term health condition or disability that resulted from their current or previous drinking | No  | 49                    | 91.2 | 78.1-96.8 | 49                                   | 91.0 | 79.4-96.4 | 53                          | 97.9  | 91.0-99.5  | 52                                                                                             | 96.4 | 86.2-99.2 | 53               | 97.8  | 84.9-99.7 |
|                                                                                                                                                         | Yes | 5                     | 8.8  | 3.2-21.9  | 5                                    | 9.0  | 3.6-20.6  | 1                           | 2.2   | 0.5-9.0    | 2                                                                                              | 3.6  | 0.8-13.8  | 1                | 2.2   | 0.3-15.1  |
| Been physically hurt due to them accidentally injuring me (e.g. by falling on me)                                                                       | No  | 49                    | 96.8 | 90.0-99.0 | 51                                   | 99.2 | 94.4-99.9 | 46                          | 89.5  | 73.4-96.3  | 47                                                                                             | 91.5 | 79.3-96.8 | 49               | 97.0  | 86.4-99.4 |
|                                                                                                                                                         | Yes | 2                     | 3.2  | 1.0-10.0  | 0                                    | 0.8  | 0.1-5.6   | 5                           | 10.6  | 3.7-26.6   | 4                                                                                              | 8.5  | 3.2-20.7  | 2                | 3.0   | 0.6-13.6  |
| Had money that would have improved the quality of my life spent on their alcohol-related purchases                                                      | No  | 43                    | 95.6 | 86.2-98.7 | 40                                   | 87.5 | 73.4-94.6 | 40                          | 88.9  | 72.6-96.0  | 44                                                                                             | 95.9 | 83.2-99.1 | 45               | 98.1  | 87.0-99.8 |
|                                                                                                                                                         | Yes | 2                     | 4.4  | 1.3-13.8  | 6                                    | 12.5 | 5.4-26.6  | 5                           | 11.1  | 4.0-27.4   | 2                                                                                              | 4.1  | 0.9-16.8  | 1                | 1.9   | 0.2-13.0  |
| Drank alcohol myself in order to cope with the problems caused by their drinking                                                                        | No  | 26                    | 90.3 | 75.9-96.5 | 27                                   | 93.8 | 76.5-98.6 | 27                          | 92.2  | 73.8-98.0  | 25                                                                                             | 87.3 | 66.8-95.9 | 28               | 95.7  | 81.5-99.1 |
|                                                                                                                                                         | Yes | 3                     | 9.7  | 3.5-24.1  | 2                                    | 6.2  | 1.4-23.5  | 2                           | 7.9   | 2.0-26.2   | 4                                                                                              | 12.7 | 4.1-33.2  | 1                | 4.3   | 0.9-18.5  |
| Felt forced or pressured into sex or something sexual                                                                                                   | No  | 23                    | 85.5 | 65.7-94.8 | 26                                   | 95.4 | 70.5-99.4 | 24                          | 86.3  | 62.9-95.9  | 23                                                                                             | 83.4 | 61.0-94.2 | 27               | 100.0 | -         |
|                                                                                                                                                         | Yes | 4                     | 14.5 | 5.2-34.3  | 1                                    | 4.7  | 0.6-29.5  | 4                           | 13.7  | 4.1-37.1   | 5                                                                                              | 16.6 | 5.8-39.0  | 0                | 0.0   | -         |
| Had to move out of my usual place of residence and stay somewhere else                                                                                  | No  | 20                    | 94.0 | 63.8-99.3 | 13                                   | 59.9 | 34.8-80.7 | 21                          | 100.0 | -          | 21                                                                                             | 97.4 | 81.0-99.7 | 21               | 100.0 | -         |
|                                                                                                                                                         | Yes | 1                     | 6.0  | 0.7-36.2  | 9                                    | 40.1 | 19.3-65.2 | 0                           | 0.0   | -          | 1                                                                                              | 2.6  | 0.3-19.0  | 0                | 0.0   | -         |



Supplementary Table 4: Frequency of harm by harm type (as a percentage of those who experienced each harm), weighted data

|                                                                                                                                                         | Frequency                                      | Percentage | 95% CI     |
|---------------------------------------------------------------------------------------------------------------------------------------------------------|------------------------------------------------|------------|------------|
| Been kept awake due to noise or disruption                                                                                                              | Daily or almost daily (i.e. 4-7 days per week) | 2.4        | 1.3- 4.3   |
|                                                                                                                                                         | Weekly (i.e. 1-3 times per week)               | 12.1       | 9.0-16.1   |
|                                                                                                                                                         | Monthly (i.e. 2-3 times per month)             | 18.4       | 14.5-23.2  |
|                                                                                                                                                         | Less than once a month                         | 67.1       | 61.7- 72.2 |
| Felt uncomfortable or anxious at a social occasion (e.g. a party)                                                                                       | Daily or almost daily (i.e. 4-7 days per week) | 1.5        | 0.6-3.9    |
|                                                                                                                                                         | Weekly (i.e. 1-3 times per week)               | 1.0        | 0.4-2.6    |
|                                                                                                                                                         | Monthly (i.e. 2-3 times per month)             | 8.0        | 5.3-12.0   |
|                                                                                                                                                         | Less than once a month                         | 89.5       | 85.2-92.6  |
| Had a serious argument that did NOT include physical violence                                                                                           | Daily or almost daily (i.e. 4-7 days per week) | 1.4        | 0.4-4.4    |
|                                                                                                                                                         | Weekly (i.e. 1-3 times per week)               | 4.8        | 2.7-8.6    |
|                                                                                                                                                         | Monthly (i.e. 2-3 times per month)             | 7.0        | 4.3-11.3   |
|                                                                                                                                                         | Less than once a month                         | 86.7       | 81.5-90.6  |
| Been let down by someone due to them failing to do something that I was counting on them to do because of their drinking                                | Daily or almost daily (i.e. 4-7 days per week) | 3.9        | 1.7-8.6    |
|                                                                                                                                                         | Weekly (i.e. 1-3 times per week)               | 9.6        | 5.5-16.4   |
|                                                                                                                                                         | Monthly (i.e. 2-3 times per month)             | 13.6       | 8.9-20.3   |
|                                                                                                                                                         | Less than once a month                         | 72.9       | 64.6-79.8  |
| Been emotionally hurt or neglected                                                                                                                      | Daily or almost daily (i.e. 4-7 days per week) | 9.0        | 5.0-15.5   |
|                                                                                                                                                         | Weekly (i.e. 1-3 times per week)               | 7.6        | 4.1-13.4   |
|                                                                                                                                                         | Monthly (i.e. 2-3 times per month)             | 15.1       | 10.0-22.3  |
|                                                                                                                                                         | Less than once a month                         | 68.3       | 59.6-75.9  |
| Felt physically threatened                                                                                                                              | Daily or almost daily (i.e. 4-7 days per week) | 4.6        | 2.1-9.9    |
|                                                                                                                                                         | Weekly (i.e. 1-3 times per week)               | 4.4        | 2.0-9.7    |
|                                                                                                                                                         | Monthly (i.e. 2-3 times per month)             | 7.6        | 3.8-14.8   |
|                                                                                                                                                         | Less than once a month                         | 83.3       | 75.2-89.2  |
| Had to stop seeing or being in contact with someone because of their drinking                                                                           | Daily or almost daily (i.e. 4-7 days per week) | 19.3       | 11.9-29.6  |
|                                                                                                                                                         | Weekly (i.e. 1-3 times per week)               | 10.4       | 5.5-18.7   |
|                                                                                                                                                         | Monthly (i.e. 2-3 times per month)             | 9.4        | 5.2-16.5   |
|                                                                                                                                                         | Less than once a month                         | 61.0       | 50.1-70.8  |
| Had to contact the police                                                                                                                               | Daily or almost daily (i.e. 4-7 days per week) | 7.8        | 3.6-16.2   |
|                                                                                                                                                         | Weekly (i.e. 1-3 times per week)               | 6.5        | 2.6-15.5   |
|                                                                                                                                                         | Monthly (i.e. 2-3 times per month)             | 7.5        | 3.8-14.1   |
|                                                                                                                                                         | Less than once a month                         | 78.2       | 67.9-85.9  |
| Had someone break or damage something that mattered to me                                                                                               | Daily or almost daily (i.e. 4-7 days per week) | 3.2        | 0.9-10.7   |
|                                                                                                                                                         | Weekly (i.e. 1-3 times per week)               | 5.0        | 1.9-12.5   |
|                                                                                                                                                         | Monthly (i.e. 2-3 times per month)             | 7.4        | 3.6-14.5   |
|                                                                                                                                                         | Less than once a month                         | 84.4       | 74.9-90.8  |
| Been physically hurt due to them assaulting me or acting violently                                                                                      | Daily or almost daily (i.e. 4-7 days per week) | 7.1        | 2.6-18.2   |
|                                                                                                                                                         | Weekly (i.e. 1-3 times per week)               | 6.3        | 2.0-17.7   |
|                                                                                                                                                         | Monthly (i.e. 2-3 times per month)             | 11.0       | 5.5-20.8   |
|                                                                                                                                                         | Less than once a month                         | 75.6       | 62.8-85.0  |
| Been put at risk in a car when someone was driving after drinking                                                                                       | Daily or almost daily (i.e. 4-7 days per week) | 8.6        | 3.4-19.9   |
|                                                                                                                                                         | Weekly (i.e. 1-3 times per week)               | 3.2        | 0.7-13.0   |
|                                                                                                                                                         | Monthly (i.e. 2-3 times per month)             | 8.5        | 3.3-20.1   |
|                                                                                                                                                         | Less than once a month                         | 79.7       | 66.6-88.6  |
| Felt genuinely concerned that they may cause harm to my children or someone else's children                                                             | Daily or almost daily (i.e. 4-7 days per week) | 6.1        | 1.8-18.1   |
|                                                                                                                                                         | Weekly (i.e. 1-3 times per week)               | 7.1        | 2.4-19.2   |
|                                                                                                                                                         | Monthly (i.e. 2-3 times per month)             | 24.5       | 12.9-41.4  |
|                                                                                                                                                         | Less than once a month                         | 62.3       | 45.7-76.5  |
| Had to spend my personal time caring for a person with a long term health condition or disability that resulted from their current or previous drinking | Daily or almost daily (i.e. 4-7 days per week) | 19.4       | 10.2-33.8  |
|                                                                                                                                                         | Weekly (i.e. 1-3 times per week)               | 15.6       | 7.5-29.7   |
|                                                                                                                                                         | Monthly (i.e. 2-3 times per month)             | 28.0       | 16.5-43.6  |
|                                                                                                                                                         | Less than once a month                         | 37.0       | 23.8-52.4  |
| Been physically hurt due to them accidentally injuring me (e.g. by falling on me)                                                                       | Daily or almost daily (i.e. 4-7 days per week) | 3.9        | 0.9-15.7   |
|                                                                                                                                                         | Weekly (i.e. 1-3 times per week)               | 8.1        | 2.8-21.3   |
|                                                                                                                                                         | Monthly (i.e. 2-3 times per month)             | 11.7       | 5.0-24.7   |
|                                                                                                                                                         | Less than once a month                         | 76.3       | 61.2-86.8  |
| Had money that would have improved the quality of my life spent on their alcohol-related purchases                                                      | Daily or almost daily (i.e. 4-7 days per week) | 6.3        | 1.9-19.1   |
|                                                                                                                                                         | Weekly (i.e. 1-3 times per week)               | 7.6        | 2.1-24.0   |
|                                                                                                                                                         | Monthly (i.e. 2-3 times per month)             | 35.8       | 21.3-53.4  |
|                                                                                                                                                         | Less than once a month                         | 50.3       | 33.7-66.7  |
| Drank alcohol myself in order to cope with the problems caused by                                                                                       | Daily or almost daily (i.e. 4-7 days per week) | 5.2        | 1.0-22.4   |

|                                                                                                                                                                                                                                                                                                                                                             | Frequency                                      | Percentage                       | 95% CI           |
|-------------------------------------------------------------------------------------------------------------------------------------------------------------------------------------------------------------------------------------------------------------------------------------------------------------------------------------------------------------|------------------------------------------------|----------------------------------|------------------|
| 1<br>2<br>3<br>4<br>5<br>6<br>7<br>8<br>9<br>10<br>11<br>12<br>13<br>14<br>15<br>16<br>17<br>18<br>19<br>20<br>21<br>22<br>23<br>24<br>25<br>26<br>27<br>28<br>29<br>30<br>31<br>32<br>33<br>34<br>35<br>36<br>37<br>38<br>39<br>40<br>41<br>42<br>43<br>44<br>45<br>46<br>47<br>48<br>49<br>50<br>51<br>52<br>53<br>54<br>55<br>56<br>57<br>58<br>59<br>60 | their drinking                                 | Weekly (i.e. 1-3 times per week) | 20.7<br>8.1-43.5 |
|                                                                                                                                                                                                                                                                                                                                                             | Monthly (i.e. 2-3 times per month)             | 42.5<br>23.0-64.8                |                  |
|                                                                                                                                                                                                                                                                                                                                                             | Less than once a month                         | 31.6<br>14.9-54.9                |                  |
| Felt forced or pressured into sex or something sexual                                                                                                                                                                                                                                                                                                       | Daily or almost daily (i.e. 4-7 days per week) | 2.4<br>0.3-17.6                  |                  |
|                                                                                                                                                                                                                                                                                                                                                             | Weekly (i.e. 1-3 times per week)               | 4.5<br>0.5-28.7                  |                  |
|                                                                                                                                                                                                                                                                                                                                                             | Monthly (i.e. 2-3 times per month)             | 2.1<br>0.3-15.5                  |                  |
| Had to move out of my usual place of residence and stay somewhere else                                                                                                                                                                                                                                                                                      | Less than once a month                         | 91.0<br>72.0-97.5                |                  |
|                                                                                                                                                                                                                                                                                                                                                             | Daily or almost daily (i.e. 4-7 days per week) | 8.1<br>1.6-31.8                  |                  |
|                                                                                                                                                                                                                                                                                                                                                             | Weekly (i.e. 1-3 times per week)               | 12.0<br>2.5-42.1                 |                  |
|                                                                                                                                                                                                                                                                                                                                                             | Monthly (i.e. 2-3 times per month)             | 6.1<br>1.3-24.8                  |                  |
|                                                                                                                                                                                                                                                                                                                                                             | Less than once a month                         | 73.8<br>47.4-89.8                |                  |

For peer review only

**STROBE 2007 (v4) Statement—Checklist of items that should be included in reports of *cross-sectional studies***

| Section/Topic                | Item # | Recommendation                                                                                                                                                                       | Reported on page #             |
|------------------------------|--------|--------------------------------------------------------------------------------------------------------------------------------------------------------------------------------------|--------------------------------|
| Title and abstract           | 1      | (a) Indicate the study's design with a commonly used term in the title or the abstract                                                                                               | 1                              |
|                              |        | (b) Provide in the abstract an informative and balanced summary of what was done and what was found                                                                                  | 2                              |
| <b>Introduction</b>          |        |                                                                                                                                                                                      |                                |
| Background/rationale         | 2      | Explain the scientific background and rationale for the investigation being reported                                                                                                 | 3                              |
| Objectives                   | 3      | State specific objectives, including any prespecified hypotheses                                                                                                                     | 3                              |
| <b>Methods</b>               |        |                                                                                                                                                                                      |                                |
| Study design                 | 4      | Present key elements of study design early in the paper                                                                                                                              | 3                              |
| Setting                      | 5      | Describe the setting, locations, and relevant dates, including periods of recruitment, exposure, follow-up, and data collection                                                      | 3                              |
| Participants                 | 6      | (a) Give the eligibility criteria, and the sources and methods of selection of participants                                                                                          | 3                              |
| Variables                    | 7      | Clearly define all outcomes, exposures, predictors, potential confounders, and effect modifiers. Give diagnostic criteria, if applicable                                             | 4                              |
| Data sources/<br>measurement | 8*     | For each variable of interest, give sources of data and details of methods of assessment (measurement). Describe comparability of assessment methods if there is more than one group | 3-4                            |
| Bias                         | 9      | Describe any efforts to address potential sources of bias                                                                                                                            | 3 (sampling) and 5 (weighting) |
| Study size                   | 10     | Explain how the study size was arrived at                                                                                                                                            | 3-4                            |
| Quantitative variables       | 11     | Explain how quantitative variables were handled in the analyses. If applicable, describe which groupings were chosen and why                                                         | 5                              |
| Statistical methods          | 12     | (a) Describe all statistical methods, including those used to control for confounding                                                                                                | 5                              |
|                              |        | (b) Describe any methods used to examine subgroups and interactions                                                                                                                  | 5                              |
|                              |        | (c) Explain how missing data were addressed                                                                                                                                          | 5                              |
|                              |        | (d) If applicable, describe analytical methods taking account of sampling strategy                                                                                                   | 5                              |
|                              |        | (e) Describe any sensitivity analyses                                                                                                                                                | NA                             |

|                          |     |                                                                                                                                                                                                              |                                                                            |
|--------------------------|-----|--------------------------------------------------------------------------------------------------------------------------------------------------------------------------------------------------------------|----------------------------------------------------------------------------|
| <b>Results</b>           |     |                                                                                                                                                                                                              |                                                                            |
| Participants             | 13* | (a) Report numbers of individuals at each stage of study—eg numbers potentially eligible, examined for eligibility, confirmed eligible, included in the study, completing follow-up, and analysed            | 5                                                                          |
|                          |     | (b) Give reasons for non-participation at each stage                                                                                                                                                         | NA                                                                         |
|                          |     | (c) Consider use of a flow diagram                                                                                                                                                                           | NA                                                                         |
| Descriptive data         | 14* | (a) Give characteristics of study participants (eg demographic, clinical, social) and information on exposures and potential confounders                                                                     | 8 and 10                                                                   |
|                          |     | (b) Indicate number of participants with missing data for each variable of interest                                                                                                                          | Not included due to space. We can add this as another supplementary table. |
| Outcome data             | 15* | Report numbers of outcome events or summary measures                                                                                                                                                         | 8 and 10                                                                   |
| Main results             | 16  | (a) Give unadjusted estimates and, if applicable, confounder-adjusted estimates and their precision (eg, 95% confidence interval). Make clear which confounders were adjusted for and why they were included | 5-11                                                                       |
|                          |     | (b) Report category boundaries when continuous variables were categorized                                                                                                                                    | NA                                                                         |
|                          |     | (c) If relevant, consider translating estimates of relative risk into absolute risk for a meaningful time period                                                                                             | NA                                                                         |
| Other analyses           | 17  | Report other analyses done—eg analyses of subgroups and interactions, and sensitivity analyses                                                                                                               | NA                                                                         |
| <b>Discussion</b>        |     |                                                                                                                                                                                                              |                                                                            |
| Key results              | 18  | Summarise key results with reference to study objectives                                                                                                                                                     | 12                                                                         |
| Limitations              | 19  | Discuss limitations of the study, taking into account sources of potential bias or imprecision. Discuss both direction and magnitude of any potential bias                                                   | 12                                                                         |
| Interpretation           | 20  | Give a cautious overall interpretation of results considering objectives, limitations, multiplicity of analyses, results from similar studies, and other relevant evidence                                   | 12-14                                                                      |
| Generalisability         | 21  | Discuss the generalisability (external validity) of the study results                                                                                                                                        | 12                                                                         |
| <b>Other information</b> |     |                                                                                                                                                                                                              |                                                                            |
| Funding                  | 22  | Give the source of funding and the role of the funders for the present study and, if applicable, for the original study on which the present article is based                                                | 5                                                                          |

\*Give information separately for cases and controls in case-control studies and, if applicable, for exposed and unexposed groups in cohort and cross-sectional studies.

1  
2  
3  
4  
5  
6  
7  
8  
9  
10  
11  
12  
13  
14  
15  
16  
17  
18  
19  
20  
21  
22  
23  
24  
25  
26  
27  
28  
29  
30  
31  
32  
33  
34  
35  
36  
37  
38  
39  
40  
41  
42  
43  
44  
45  
46  
47

**Note:** An Explanation and Elaboration article discusses each checklist item and gives methodological background and published examples of transparent reporting. The STROBE checklist is best used in conjunction with this article (freely available on the Web sites of PLoS Medicine at <http://www.plosmedicine.org/>, Annals of Internal Medicine at <http://www.annals.org/>, and Epidemiology at <http://www.epidem.com/>). Information on the STROBE Initiative is available at [www.strobe-statement.org](http://www.strobe-statement.org).

For peer review only

# BMJ Open

## Alcohol-related harm to others in England: a cross-sectional analysis of National survey data

|                                 |                                                                                                                                                                                                                                                                                                                                                                                                                                                                                                                                                                                                                                        |
|---------------------------------|----------------------------------------------------------------------------------------------------------------------------------------------------------------------------------------------------------------------------------------------------------------------------------------------------------------------------------------------------------------------------------------------------------------------------------------------------------------------------------------------------------------------------------------------------------------------------------------------------------------------------------------|
| Journal:                        | <i>BMJ Open</i>                                                                                                                                                                                                                                                                                                                                                                                                                                                                                                                                                                                                                        |
| Manuscript ID                   | bmjopen-2017-021046.R3                                                                                                                                                                                                                                                                                                                                                                                                                                                                                                                                                                                                                 |
| Article Type:                   | Research                                                                                                                                                                                                                                                                                                                                                                                                                                                                                                                                                                                                                               |
| Date Submitted by the Author:   | 03-Oct-2018                                                                                                                                                                                                                                                                                                                                                                                                                                                                                                                                                                                                                            |
| Complete List of Authors:       | Beynon, Caryl; Public Health England, Risk Factors Intelligence Team, Health Improvement Directorate<br>Bayliss, David; Public Health England, Risk Factors Intelligence Team, Health Improvement Directorate<br>Mason, Jenny; Public Health England, Risk Factors Intelligence Team, Health Improvement Directorate<br>Sweeney, Kate; Public Health England, Risk Factors Intelligence, Health Improvement Directorate<br>Perkins, Clare; Public Health England, Risk Factors Intelligence, Health Improvement Directorate<br>Henn, Clive; Public Health England, Alcohol, Drugs and Tobacco Division, Health Improvement Directorate |
| <b>Primary Subject Heading</b>: | Public health                                                                                                                                                                                                                                                                                                                                                                                                                                                                                                                                                                                                                          |
| Secondary Subject Heading:      | Epidemiology, Health policy                                                                                                                                                                                                                                                                                                                                                                                                                                                                                                                                                                                                            |
| Keywords:                       | alcohol-related harm to others, alcohol, violence                                                                                                                                                                                                                                                                                                                                                                                                                                                                                                                                                                                      |
|                                 |                                                                                                                                                                                                                                                                                                                                                                                                                                                                                                                                                                                                                                        |

SCHOLARONE™  
Manuscripts

Alcohol-related harm to others in England: a cross-sectional analysis of National survey data

Beynon C, Bayliss D, Mason J, Sweeney K, Perkins C, Henn C

Corresponding author: Caryl Beynon

Address: Risk Factor Intelligence Team, Health Improvement Directorate, Public Health England, Suite 3b, Cunard Building, Water Street, Liverpool, L3 1DS, United Kingdom

Email: [caryl.beynon@phe.gov.uk](mailto:caryl.beynon@phe.gov.uk)

Telephone: 0151 706 6205

Co-Authors:

David Bayliss, Risk Factors Intelligence Team, Public Health England, Manchester, United Kingdom.

Jenny Mason, Risk Factors Intelligence Team, Public Health England, Liverpool, United Kingdom.

Kate Sweeney, Risk Factors Intelligence Team, Public Health England, Liverpool, United Kingdom.

Clare Perkins, Risk Factors Intelligence Team, Public Health England, Liverpool, United Kingdom.

Clive Henn, Alcohol, Drugs and Tobacco Division, Public Health England, London, United Kingdom.

## ABSTRACT

Objectives: to estimate the prevalence, the frequency and the perpetrators of alcohol-related harm to others and identify factors associated with experiencing harm and aggressive harm.

Design: Cross-sectional survey.

Setting: England.

Participants: Adults (general population) aged 16 and over.

Outcome measures: Percentage of respondents who experienced harm. Socio-economic and demographic factors associated with the outcomes. Outcomes were 1. Experienced harm/did not experience harm and 2. Experienced aggressive harm (physically threatened, physically hurt and forced/pressured into something sexual)/did not experience an aggressive harm (no aggressive harm plus no harm at all).

Results: The weighted sample was 4,874; 20.1% (95% confidence interval [CI] 18.9-21.4) reported experiencing harm in the previous 12 months and 4.6% (95% CI 4.0-5.4) reported experiencing an aggressive harm. Friends and strangers were the dominant perpetrators. Most harms occurred less than monthly but 5.2% of respondents experienced harm daily/almost daily. Factors associated with experiencing harm were: younger age, drinking harmfully/hazardously, White British, having a disability, being educated and living in private rented accommodation (compared with being an owner occupier). Being in the family stage of life (defined as having children in the household) and being retired (compared with being employed) had significantly lower odds of harm. Factors associated with experiencing an aggressive harm were similar.

Conclusions: This exploratory study shows that alcohol-related harm to others affects a sizeable proportion of the population of England. Even apparently insignificant harms, like being kept awake, can have a negative impact on health, while aggressive harms are clearly of concern. That 5% of respondents experience harm daily/almost daily suggests a population of people with a particularly high burden likely to affect health. Using a standard methodology to measure harm across studies would be advantageous. Policies that focus on alcohol must take into consideration the impact of drinking on those other than the drinker.

## STRENGTHS AND LIMITATIONS OF THE STUDY

- This is the largest survey on alcohol-related harm to others in the United Kingdom and the first national survey in England.
- The sampling approach and weighting ensured the data were representative of the population of England.
- There is potential selection bias which is inherent in all national surveys.
- The use of a bespoke survey made comparison of the findings with the literature difficult but when the study was initiated no other universally accepted survey was identified.

Key words: alcohol-related harm to others, alcohol, violence

Word count: 6,415



## INTRODUCTION

1  
2 The detrimental effects of alcohol are well documented; in 2012 alcohol consumption was  
3 responsible for approximately 6% of deaths and 5% of disease burden globally.<sup>1</sup> The focus has  
4 been on the harmful effects of alcohol on the drinker with less attention on the harms caused to  
5 others, including families, work colleagues and wider society. The World Health Organization's  
6 (WHO) global alcohol strategy highlights the need to consider the harm alcohol causes to people  
7 other than the drinker,<sup>2</sup> and it is these alcohol-related harms to others (AHTO) that are the focus of  
8 this study.  
9

10 Health and social data provide insight into the potential harms caused by another's drinking. Data  
11 from the Crime Survey for England and Wales, for example, show that in just over half of all violent  
12 crimes the victim perceived the offender to be under the influence of alcohol and that drinking was  
13 particularly implicated in violent incidents between strangers.<sup>3</sup> Data from the Department of  
14 Transport show that in England during 2013 to 2015, there were almost 10,000 alcohol-related  
15 road traffic accidents in which at least one driver failed the alcohol breathalyser test (data are  
16 available at: <https://fingertips.phe.org.uk/profile/local-alcohol-profiles>), demonstrating a  
17 considerable potential harm to both the drinking driver and to others on the roads.  
18  
19

20 In the last decade or so several studies have aimed to quantify and explore AHTO in more detail.  
21 These studies have provided widely varying estimates of the prevalence of harm, largely due to  
22 differences in the way harms are defined and the reference population. Studies which focus on  
23 identifying the socio-demographic and behavioural factors associated with being the victim of harm  
24 do not always provide consistent findings, suggesting the need for further research. While there is  
25 a relatively consistent finding across studies that younger age increases the likelihood of  
26 experiencing harm,<sup>4-6</sup> the association of harm with other characteristics is less clear. For example,  
27 women have generally been identified as more at risk of harm from another's drinking than men  
28 but this is not consistent across all countries and some authors report this association for certain  
29 types of harm only.<sup>4-7</sup> Two studies identified that women were more likely to experience unwanted  
30 sexual attention/harassment/assault, whereas men were more likely to experience having their  
31 belongings or property damaged.<sup>4,6</sup>  
32  
33

34 When the impact of alcohol includes the effects to the individual drinker and wider society, the cost  
35 is considerable. A review of studies in high-income countries found the gross economic costs of  
36 alcohol to range from 1.4% to 2.7% of gross domestic product; in the United Kingdom (UK) in  
37 2016 this would be equivalent to between £27 billion and £52 billion.<sup>8</sup> There is a need to better  
38 understand AHTO and the characteristics of those affected in order to implement an effective  
39 response. To date there has been no national survey of AHTO in England, although surveys have  
40 been conducted in Scotland,<sup>9</sup> Wales<sup>10</sup> and Ireland.<sup>11</sup> The objectives of this exploratory study were  
41 to estimate the prevalence of AHTO in England, identify factors associated with being the victim of  
42 harm, the frequency with which this harm occurs and the perpetrators of harm.  
43  
44  
45

## METHOD

### The survey

46  
47  
48  
49 The questions to identify experience of AHTO were devised after an evidence review and were  
50 added to the Alcohol Toolkit Survey (ATS) between 1<sup>st</sup> November 2015 and 31<sup>st</sup> January 2016.  
51 The ATS is a cross-sectional household survey, run by University College London and  
52 administered by Ipsos MORI using computer-assisted interviews. Each month a new sample of  
53 adults aged 16 and over who live in England complete the survey. Households are selected using  
54 a type of random location sampling which is a hybrid of random probability sampling and simple  
55 quota sampling (so that each monthly sample is representative of the population). Interviews are  
56  
57  
58  
59

conducted with one member of the selected household.<sup>12</sup> The AHTO questions were self-completed following guidance on this from the Research Support and Governance Office, Public Health England. Due to the novel and exploratory nature of the work, no formal sample size calculation was undertaken as the parameters on which to base this were unknown. Instead, a three month window of data collection was chosen, knowing that the ATS aimed to survey approximately 1,800 adults per month.<sup>12</sup> The sample size was considerably larger than other studies of AHTO conducted in the UK.<sup>9 10 13</sup>

The AHTO questions asked whether or not the respondent had experienced the following harms from another's drinking in the past 12 months:

Because of someone else's drinking I have....

1. Had a serious argument that did not include physical violence.
2. Felt physically threatened.
3. Been emotionally hurt or neglected.
4. Been physically hurt due to them assaulting me or acting violently.
5. Been physically hurt due to them accidentally injuring me (e.g. by falling on me).
6. Been put at risk in a car when someone was driving after drinking.
7. Felt forced or pressured into sex or something sexual.
8. Felt uncomfortable or anxious at a social occasion (e.g. a party).
9. Had someone break or damage something that mattered to me.
10. Had money that would have improved the quality of my life spent on their alcohol-related purchases.
11. Felt genuinely concerned that they may cause harm to my children or someone else's children.
12. Had to spend my personal time caring for a person with a long term health condition or disability that resulted from their current or previous drinking.
13. Been let down by someone due to them failing to do something that I was counting on them to do because of their drinking.
14. Been kept awake due to noise or disruption.
15. Drank alcohol myself in order to cope with the problems caused by their drinking.
16. Had to stop seeing or being in contact with someone because of their drinking.
17. Had to move out of my usual place of residence and stay somewhere else.
18. Had contact with the police.

If a respondent indicated that they had experienced any of the harms they were asked to indicate who perpetrated the harm and the frequency with which the harm occurred. Response options for who perpetrated the harm were: someone you were in a relationship with (e.g. wife/husband, partner) who you lived with; someone you were in a relationship with (e.g. wife/husband, partner) who you did not live with; another family member you lived with; a family member you did not live with; someone else you lived with; a friend; a work colleague; someone else you know; a stranger; refused/prefer not to say and don't know. Response options for the frequency of harm were: daily or almost daily (i.e. 4-7 days per week); weekly (i.e. 1-3 times per week); monthly (i.e. 2-3 times per month); less than once a month; refused/prefer not to say and don't know.

A range of demographic and socio-economic variables, collected as part of the ATS, were used as independent variables: sex (female, male); age band in years (16-24, 25-44, 45-64, 65 and over); broad ethnic group (White British, Other White, Black, Asian, Other); life stage (single, pre-family, family, post-family); educational attainment (no qualifications, GCSE/O-level/CSE, A-level/vocational, degree/higher degree, other/still studying); social grade (AB [higher managerial, administrative and professional], C1 [supervisory, clerical and junior managerial, administrative and professional], C2 [skilled manual workers], D [semi-skilled and unskilled manual workers], E [state pensioners, casual and lowest grade workers, unemployed with state benefits only]); tenure

of home (owned outright, bought on a mortgage, rented from local authority, rented from private landlord, other); self-defined disability (yes, no) and employment status (employed, unemployed, economically inactive, retired). 'Life stage' was derived from age, marital status and number of children living in the household and is defined as follows: single (up to the age of 39, not married/in a civil partnership and no children in the household), pre-family (up to the age of 39, married/in a civil partnership and no children in the household), family (children living in the household) and post-family (aged 40 and over, no children in the household). The respondents' alcohol consumption was measured using the Alcohol Use Disorders Identification Test (AUDIT) which is used to identify hazardous and harmful drinkers. Here hazardous/harmful drinkers were identified as those with scores of eight or more if aged 65 or under, and scores of seven or more if aged over 65, in line with WHO guidance.<sup>14</sup>

## Analysis

Respondents who refused to complete the AHTO questions and those who chose the 'don't know' or 'refused/prefer not to say' options for all 18 harm questions were excluded from all analyses. Chi square tests were used to compare the characteristics of those who were included in the analysis to those that were excluded due to missing data on the AHTO questions. Individuals who failed to provide a valid response to other questions were excluded from the analysis of that particular independent variable. People with one or more missing covariate were excluded from the multivariate analyses.

Two binary dependent variables were created. 'Any harm' was coded as yes if a person had experienced any of the 18 harm types in the previous 12 months. 'Aggressive harm' was coded as yes if the person had experienced one or more of the following three harms: felt physically threatened, been physically hurt due to them assaulting me or acting violently and felt forced or pressured into sex or something sexual. The categorisation of 'aggressive harm' is in line with previous research on AHTO.<sup>4</sup>

All analyses were undertaken using Stata 13 and the 'svy' command prefix for analysing survey data. Prevalence was estimated by dividing the positive responses by the total responses for each harm type, any harm and aggressive harm; 95% confidence intervals (CI) were calculated for each prevalence estimate using the standard settings of Stata's 'svy: tabulate' command.<sup>15</sup> Bivariate independence was tested using a 'corrected' Pearson chi-squared statistic for survey data [design-based *F* tests based on Rao and Scott correction].<sup>16</sup> Multivariate analyses (binary logistic regression) were conducted to model the joint effects of the independent variables significantly associated with any harm and aggressive harm in the bivariate analyses with 'no harm' and 'no aggressive harm' as the reference categories. Adjusted odds ratios (AOR) are presented in comparison to the reference category for the given variable and *t* tests provide an indication of statistical significance. Where comparisons are presented between categories of a variable where neither is the reference category, an indication of statistical significance is given using adjusted Wald tests. Analyses were weighted (using weights generated by the ATS) in order to improve the representativeness of the sample relative to an English population profile using multiple socio-demographic variables.<sup>12</sup> Due to the exploratory nature of the analysis,  $\alpha$  is set at 0.05 for all tests. The risk of type I error is considered less important than the risk of type II error: deflating  $\alpha$  may limit further investigation at a point where the evidence base is developing.

## Patient and public involvement

Patients and the public were not involved in this study.

## Ethics and funding

Approval for the ATS was granted by University College London's ethics committee (reference: 0498/001) and for the AHTO questions by the Research Support and Governance Office, Public Health England (reference: R&D 055). This work was funded by Public Health England.

## RESULTS

### Missing data

The original (unweighted) sample size was 5,068. The proportion of missing data was relatively small; 96 people (1.9%) did not complete the AHTO questions and a further 91 (1.8%) answered 'don't know/refused' to all AHTO questions; both groups were excluded from the analyses leaving an unweighted sample size of 4,881 (96.3% of the original sample). Supplementary Table 1 compares the number/proportion of people included in the analyses with those who were excluded because they did not provide a response to the AHTO questions, by independent variable. There were significant differences in the proportion of people that were included and excluded for sex, tenure of home, disability and AUDIT score. Of the 4,881 people included in the bivariate analyses, 189 (3.9%) were excluded from the multivariate analyses because one or more independent variable was missing.

### Prevalence of harm

Table 1 reports the estimated prevalence of each type of harm; 20.1% (95% CI 18.9%-21.4%) of people reported experiencing at least one harm due to someone else's drinking in the past 12 months. These data by sex are reported in Supplementary Table 2. While the numbers are too small to make a comprehensive assessment of the differences by sex (and such differences are not the focus of this paper), some disparities in harm were evident. For example there was a clear difference between the proportion of men (2.1% 95% CI 1.6%-2.9%) and women (4.8% 95% CI 3.9%-5.8%) who reported experiencing alcohol-related emotional hurt or neglect. Aggressive harms were experienced by 4.6% (95% CI 4.0%-5.4%) of respondents.

Table 1: Prevalence of harm in the previous 12 months, weighted data

| Harm type                                                                                                                                               | Number of respondents who experienced harm | Percentage of respondents who experienced harm | 95% CI      |
|---------------------------------------------------------------------------------------------------------------------------------------------------------|--------------------------------------------|------------------------------------------------|-------------|
| Been kept awake due to noise or disruption                                                                                                              | 390                                        | 8.0                                            | 7.2 - 8.9   |
| Felt uncomfortable or anxious at a social occasion (e.g. a party)                                                                                       | 331                                        | 6.8                                            | 6.0 - 7.6   |
| Had a serious argument that did NOT include physical violence                                                                                           | 275                                        | 5.7                                            | 5.0 - 6.4   |
| Been let down by someone due to them failing to do something that I was counting on them to do because of their drinking                                | 174                                        | 3.6                                            | 3.0 - 4.2   |
| Been emotionally hurt or neglected                                                                                                                      | 170                                        | 3.5                                            | 3.0 - 4.1   |
| Felt physically threatened                                                                                                                              | 164                                        | 3.4                                            | 2.8 - 4.0   |
| Had to stop seeing or being in contact with someone because of their drinking                                                                           | 120                                        | 2.5                                            | 2.0 - 3.0   |
| Had to contact the police                                                                                                                               | 117                                        | 2.4                                            | 2.0 - 2.9   |
| Had someone break or damage something that mattered to me                                                                                               | 95                                         | 1.9                                            | 1.5 - 2.5   |
| Been physically hurt due to them assaulting me or acting violently                                                                                      | 92                                         | 1.9                                            | 1.5 - 2.4   |
| Been put at risk in a car when someone was driving after drinking                                                                                       | 75                                         | 1.5                                            | 1.2 - 2.0   |
| Felt genuinely concerned that they may cause harm to my children or someone else's children                                                             | 61                                         | 1.2                                            | 0.9 - 1.6   |
| Had to spend my personal time caring for a person with a long term health condition or disability that resulted from their current or previous drinking | 57                                         | 1.2                                            | 0.9 - 1.5   |
| Been physically hurt due to them accidentally injuring me (e.g. by falling on me)                                                                       | 53                                         | 1.1                                            | 0.8 - 1.5   |
| Had money that would have improved the quality of my life spent on their alcohol-related purchases                                                      | 50                                         | 1.0                                            | 0.8 - 1.4   |
| Drank alcohol myself in order to cope with the problems caused by their drinking                                                                        | 33                                         | 0.7                                            | 0.5 - 1.0   |
| Felt forced or pressured into sex or something sexual                                                                                                   | 33                                         | 0.7                                            | 0.5 - 1.0   |
| Had to move out of my usual place of residence and stay somewhere else                                                                                  | 25                                         | 0.5                                            | 0.3 - 0.8   |
| At least one reported harm                                                                                                                              | 980                                        | 20.1                                           | 18.9 - 21.4 |
| At least one aggressive harm                                                                                                                            | 225                                        | 4.6                                            | 4.0 - 5.4   |

Weighted N = 4,874.

### Bivariate and multivariate results (factors associated with harm)

Factors associated with experiencing any harm in the bivariate analyses are reported in Table 2. Experience of harm decreased with age. This trend by age was reflected in experience of harm by life stage, with 36.5% (95% CI 32.8%-40.5%) of single people experiencing harm compared to 15.0% (95% CI 13.4%-16.7%) of those in a 'post-family' life stage. White British people were more likely to report experiencing harm (21.8%, 95% CI 20.3%-23.4%) than people of other broad ethnic groups; people of Asian ethnicity had the lowest prevalence (10.9%, 95% CI 8.2%-14.2%). People with no qualifications were least likely to report experiencing harm (9.9%, 95% CI 7.9%-12.5%). Those whose highest attainment was A-level or vocational had the highest prevalence (26.7%, 95% CI 24.1%-29.3%). People in the private-rented sector had the highest harm prevalence by tenure (29.9%, 95% CI 26.9%-33.1%). This compares to just 14.0% (95% CI 12.3%-16.0%) of people who owned their home outright experiencing harm. People who considered themselves disabled were more likely to report having experienced harm than those who did not (24.0%, 95% CI 20.3%-28.1%, compared to 19.7%, 95% CI 18.4%-21.1%). Those who were unemployed (26.8%, 95% CI 21.0%-33.6%) or economically inactive (26.8%, 95% CI 24.0%-29.9%) were more likely to report harm than those who were employed (22.0%, 95% CI 20.2%-24.0%); the difference between the unemployed and employed was not significant. Retired people were much less likely to report experiencing at least one harm (9.1%, 95% CI 7.5%-10.9%) than people across all other employment statuses. The prevalence of AHTO was significantly higher among hazardous/harmful drinkers

1 (37.9%, 95% CI 33.9%-42.1%) compared to those who were not (17.3%, 95% CI 16.0%-  
2 18.6%).  
3

4 In the multivariate model, young age remained strongly associated with experiencing harm  
5 due to someone else's drinking, with those aged 16-24 having greater odds of  
6 experiencing harm than all older age groups (Table 2). Being a hazardous/harmful drinker  
7 was strongly associated with experiencing harm; the odds of experiencing harm were  
8 around double the odds of those who were not hazardous/harmful drinkers. Being White  
9 British compared to being Other White, Black or Asian ethnicities was also associated with  
10 greater odds of experiencing harm, as was considering oneself disabled, being educated,  
11 and living in private-rented accommodation compared to being an owner occupier. The  
12 odds of experiencing harm were lower for respondents in the family stage of life than the  
13 odds for those that were single. The odds of experiencing harm were lower for retired  
14 respondents than the odds for employed respondents.  
15  
16  
17  
18  
19  
20  
21  
22  
23  
24  
25  
26  
27  
28  
29  
30  
31  
32  
33  
34  
35  
36  
37  
38  
39  
40  
41  
42  
43  
44  
45  
46  
47  
48  
49  
50  
51  
52  
53  
54  
55  
56  
57  
58  
59  
60

Table 2: Bivariate and multivariate comparisons of harm versus no harm from another's drinking in past 12 months, weighted data

| Independent variable                  | Bivariate comparisons |      |             |      |      |             | Multivariate comparisons   |        |             |
|---------------------------------------|-----------------------|------|-------------|------|------|-------------|----------------------------|--------|-------------|
|                                       | No harm               |      |             | Harm |      |             | AOR                        | p      | 95% CI      |
|                                       | N                     | %    | 95% CI      | N    | %    | 95% CI      |                            |        |             |
| <b>Sex</b>                            |                       |      |             |      |      |             |                            |        |             |
| Female                                | 2,008                 | 80.1 | 78.3 - 81.8 | 498  | 19.9 | 18.2 - 21.7 | Not entered into the model |        |             |
| Male                                  | 1,887                 | 79.7 | 77.7 - 81.4 | 482  | 20.3 | 18.6 - 22.3 |                            |        |             |
| <b>Age band<sup>†</sup></b>           |                       |      |             |      |      |             |                            |        |             |
| 16-24                                 | 446                   | 63.4 | 59.6 - 67.0 | 258  | 36.6 | 33.0 - 40.4 | Reference                  |        |             |
| 25-44                                 | 1,278                 | 78.4 | 76.0 - 80.7 | 352  | 21.6 | 19.3 - 24.0 | 0.63                       | <0.001 | 0.49 - 0.83 |
| 45-64                                 | 1,237                 | 81.5 | 79.1 - 83.7 | 281  | 18.5 | 16.3 - 20.9 | 0.50                       | <0.001 | 0.34 - 0.75 |
| 65+                                   | 933                   | 91.2 | 89.3 - 92.9 | 90   | 8.8  | 7.1 - 10.7  | 0.36                       | <0.001 | 0.21 - 0.61 |
| <b>Broad ethnic group<sup>†</sup></b> |                       |      |             |      |      |             |                            |        |             |
| White British                         | 2,975                 | 78.2 | 76.7 - 79.7 | 830  | 21.8 | 20.3 - 23.4 | Reference                  |        |             |
| Other White groups                    | 334                   | 84.9 | 80.4 - 88.5 | 59   | 15.1 | 11.5 - 19.6 | 0.52                       | <0.001 | 0.36 - 0.76 |
| Black groups                          | 151                   | 83.9 | 78.6 - 88.1 | 29   | 16.1 | 11.9 - 21.4 | 0.61                       | 0.017  | 0.41 - 0.92 |
| Asian groups                          | 376                   | 89.1 | 85.8 - 91.8 | 46   | 10.9 | 8.2 - 14.2  | 0.39                       | <0.001 | 0.28 - 0.56 |
| Other groups                          | 44                    | 82.2 | 68.7 - 90.7 | 9    | 17.8 | 9.3 - 31.3  | 0.60                       | 0.154  | 0.30 - 1.21 |
| <b>Life stage<sup>†</sup></b>         |                       |      |             |      |      |             |                            |        |             |
| Single                                | 436                   | 63.5 | 59.5 - 67.2 | 251  | 36.5 | 32.8 - 40.5 | Reference                  |        |             |
| Pre-family                            | 222                   | 72.2 | 65.6 - 77.9 | 86   | 27.8 | 22.1 - 34.4 | 0.91                       | 0.620  | 0.61 - 1.34 |
| Family                                | 1,285                 | 81.1 | 78.8 - 83.2 | 299  | 18.9 | 16.8 - 21.2 | 0.68                       | 0.006  | 0.52 - 0.89 |
| Post-family                           | 1,950                 | 85.0 | 83.3 - 86.6 | 344  | 15.0 | 13.4 - 16.7 | 0.85                       | 0.433  | 0.56 - 1.28 |
| <b>Education<sup>†</sup></b>          |                       |      |             |      |      |             |                            |        |             |
| No qualifications                     | 683                   | 90.1 | 87.5 - 92.2 | 75   | 9.9  | 7.8 - 12.5  | Reference                  |        |             |
| GCSE/O-level/CSE                      | 764                   | 79.3 | 76.2 - 82.1 | 199  | 20.7 | 17.9 - 23.8 | 1.74                       | <0.001 | 1.25 - 2.44 |
| A-level/vocational                    | 974                   | 73.3 | 70.7 - 75.9 | 354  | 26.7 | 24.1 - 29.3 | 2.04                       | <0.001 | 1.48 - 2.82 |
| Degree/higher degree                  | 1,156                 | 79.3 | 76.8 - 81.7 | 301  | 20.7 | 18.3 - 23.2 | 2.16                       | <0.001 | 1.56 - 3.00 |
| Other/still studying                  | 294                   | 85.6 | 81.2 - 89.1 | 50   | 14.4 | 10.9 - 18.9 | 1.42                       | 0.109  | 0.92 - 2.18 |
| <b>Social grade<sup>‡</sup></b>       |                       |      |             |      |      |             |                            |        |             |
| AB                                    | 1,066                 | 80.8 | 78.0 - 83.3 | 254  | 19.2 | 16.7 - 22.0 | Not entered into the model |        |             |
| C1                                    | 1,023                 | 77.4 | 75.0 - 79.6 | 299  | 22.6 | 20.4 - 25.0 |                            |        |             |
| C2                                    | 878                   | 81.7 | 78.8 - 84.4 | 196  | 18.3 | 15.6 - 21.2 |                            |        |             |
| D                                     | 614                   | 82.5 | 79.1 - 85.4 | 131  | 17.5 | 14.6 - 20.9 |                            |        |             |
| E                                     | 313                   | 75.8 | 71.8 - 79.4 | 100  | 24.2 | 20.6 - 28.2 |                            |        |             |
| <b>Tenure<sup>†</sup></b>             |                       |      |             |      |      |             |                            |        |             |
| Owned outright                        | 1,451                 | 86.0 | 84.0 - 87.8 | 237  | 14.0 | 12.3 - 16.0 | Reference                  |        |             |
| Bought on a mortgage                  | 1,142                 | 79.2 | 76.4 - 81.6 | 301  | 20.9 | 18.4 - 23.6 | 0.97                       | 0.825  | 0.74 - 1.28 |
| Rented from local authority           | 341                   | 78.8 | 74.6 - 82.5 | 92   | 21.2 | 17.6 - 25.4 | 1.38                       | 0.060  | 0.99 - 1.94 |
| Rented from private landlord          | 678                   | 70.1 | 66.9 - 73.1 | 289  | 29.9 | 26.9 - 33.1 | 1.52                       | 0.004  | 1.15 - 2.01 |
| Other                                 | 248                   | 81.1 | 76.7 - 84.8 | 58   | 19.0 | 15.2 - 23.4 | 1.11                       | 0.562  | 0.77 - 1.61 |
| <b>Disability<sup>†</sup></b>         |                       |      |             |      |      |             |                            |        |             |
| Considers self disabled               | 396                   | 76.0 | 71.9 - 79.7 | 125  | 24.0 | 20.3 - 28.1 | Reference                  |        |             |
| Not disabled                          | 3,422                 | 80.3 | 78.9 - 81.6 | 842  | 19.7 | 18.4 - 21.1 | 0.56                       | <0.001 | 0.42 - 0.74 |
| <b>Employment status<sup>†</sup></b>  |                       |      |             |      |      |             |                            |        |             |
| Employed                              | 2,081                 | 78.0 | 76.0 - 79.8 | 588  | 22.0 | 20.2 - 24.0 | Reference                  |        |             |
| Unemployed                            | 157                   | 73.2 | 66.4 - 79.0 | 58   | 26.8 | 21.0 - 33.6 | 1.09                       | 0.648  | 0.75 - 1.58 |
| Economically inactive                 | 634                   | 73.2 | 70.1 - 76.1 | 232  | 26.8 | 24.0 - 29.9 | 1.01                       | 0.896  | 0.81 - 1.27 |
| Retired                               | 1,021                 | 90.9 | 89.1 - 92.5 | 102  | 9.1  | 7.5 - 10.9  | 0.54                       | <0.001 | 0.38 - 0.78 |
| <b>AUDIT<sup>†</sup></b>              |                       |      |             |      |      |             |                            |        |             |
| Not hazardous/harmful drinking        | 3,463                 | 82.7 | 81.4 - 84.0 | 723  | 17.3 | 16.0 - 18.6 | Reference                  |        |             |
| Hazardous/harmful drinking            | 419                   | 62.1 | 57.9 - 66.1 | 256  | 37.9 | 33.9 - 42.1 | 2.06                       | <0.001 | 1.66 - 2.56 |

Weighted N = 4,874 (bivariate analyses) and 4,698 (multivariate analysis). Bivariate totals that are 4,875 not 4,874 are due to rounding as the analyses use weighted data.

AOR: adjusted odds ratio.

<sup>†</sup>test of bivariate independence indicates significant difference ( $p < 0.05$ ).

<sup>‡</sup>AB is higher managerial, administrative and professional and Intermediate managerial, administrative and professional; C1 is supervisory, clerical and junior managerial, administrative and professional; C2 is skilled manual workers; D is semi-skilled and unskilled manual workers; and E is state pensioners, casual and lowest grade workers, unemployed with state benefits only.

## Aggressive harm

In bivariate analyses, men were marginally more likely to experience an aggressive harm than women (5.3% and 4.0% respectively,  $p = 0.04$ , Table 3). The other characteristics associated with experiencing aggressive harms were similar to experiencing any harm, with a higher prevalence of aggressive harm associated with being younger, disabled, single, non-retired, White British, renting accommodation and being a hazardous/harmful drinker.

1 Controlling for other variables in the model, sex and stage of life were not associated with  
2 experiencing an aggressive harm (Table 3). Age remained associated with harm after  
3 adjustment for other variables; those aged 45 and over had lower odds of experiencing an  
4 aggressive harm than those aged 16-24. Disability was also strongly associated with  
5 experience of aggressive harm; the odds of experiencing aggressive harm for non-disabled  
6 people was just over a third of the odds for disabled people (AOR=0.37, 95% CI 0.24-  
7 0.59). Housing tenure was relatively strongly associated, with the odds of experiencing an  
8 aggressive harm for renters around double the odds of those who are home owners. This  
9 was also the case for hazardous/harmful drinkers, with an AOR of 2.35 (95% CI 1.63-3.40)  
10 relative to those who were not hazardous/harmful drinkers. Being White British compared  
11 to being in the Other White, Black or Asian ethnic groups was also associated with greater  
12 odds of experiencing an aggressive harm. Differences in the odds of experiencing an  
13 aggressive harm between people with different educational attainment were minimal; the  
14 only significant difference being the greater odds for those with a degree/higher degree  
15 relative to those with no qualifications. The odds of experiencing an aggressive harm for  
16 those that were retired remained significantly lower than the odds of an aggressive harm  
17 for those that were employed (AOR 0.33, 95% CI 0.13-0.83).  
18  
19  
20  
21  
22  
23  
24  
25  
26  
27  
28  
29  
30  
31  
32  
33  
34  
35  
36  
37  
38  
39  
40  
41  
42  
43  
44  
45  
46  
47  
48  
49  
50  
51  
52  
53  
54  
55  
56  
57  
58  
59  
60



Table 3: Bivariate and multivariate comparisons of aggressive harm versus no aggressive harm from another's drinking in past 12 months, weighted data

| Independent variable                  | Bivariate comparisons |      |             |                 |      |            | Multivariate comparisons   |        |             |
|---------------------------------------|-----------------------|------|-------------|-----------------|------|------------|----------------------------|--------|-------------|
|                                       | No aggressive harm    |      |             | Aggressive harm |      |            | AOR                        | p      | 95% CI      |
|                                       | N                     | %    | 95% CI      | N               | %    | 95% CI     |                            |        |             |
| <b>Sex<sup>†</sup></b>                |                       |      |             |                 |      |            |                            |        |             |
| Male                                  | 2,242                 | 94.7 | 93.5 - 95.6 | 127             | 5.3  | 4.4 - 6.5  | Reference                  |        |             |
| Female                                | 2,407                 | 96.1 | 95.1 - 96.8 | 99              | 4.0  | 3.2 - 4.9  | 0.74                       | 0.086  | 0.53 - 1.04 |
| <b>Age band<sup>†</sup></b>           |                       |      |             |                 |      |            |                            |        |             |
| 16-24                                 | 646                   | 91.7 | 89.1 - 93.6 | 59              | 8.4  | 6.4 - 10.9 | Reference                  |        |             |
| 25-44                                 | 1,539                 | 94.4 | 92.9 - 95.6 | 91              | 5.6  | 4.4 - 7.1  | 0.84                       | 0.510  | 0.49 - 1.43 |
| 45-64                                 | 1,454                 | 95.8 | 94.4 - 96.9 | 64              | 4.2  | 3.1 - 5.6  | 0.43                       | 0.024  | 0.20 - 0.89 |
| 65+                                   | 1,010                 | 98.8 | 98.0 - 99.3 | 12              | 1.2  | 0.7 - 2.0  | 0.29                       | 0.044  | 0.09 - 0.97 |
| <b>Broad ethnic group<sup>†</sup></b> |                       |      |             |                 |      |            |                            |        |             |
| White British                         | 3,605                 | 94.8 | 93.8 - 95.5 | 200             | 5.3  | 4.5 - 6.2  | Reference                  |        |             |
| Other White groups                    | 384                   | 97.7 | 95.6 - 98.8 | 9               | 2.3  | 1.2 - 4.4  | 0.30                       | 0.002  | 0.14 - 0.64 |
| Black groups                          | 176                   | 97.6 | 95.1 - 98.8 | 4               | 2.4  | 1.2 - 4.9  | 0.37                       | 0.020  | 0.16 - 0.86 |
| Asian groups                          | 411                   | 97.5 | 95.4 - 98.7 | 11              | 2.5  | 1.4 - 4.7  | 0.43                       | 0.023  | 0.21 - 0.89 |
| Other groups                          | 52                    | 97.5 | 88.7 - 99.5 | 1               | 2.5  | 0.5 - 11.3 | 0.36                       | 0.217  | 0.07 - 1.83 |
| <b>Life stage<sup>†</sup></b>         |                       |      |             |                 |      |            |                            |        |             |
| Single                                | 629                   | 91.5 | 88.9 - 93.6 | 58              | 8.5  | 6.4 - 11.1 | Reference                  |        |             |
| Pre-family                            | 286                   | 92.9 | 88.2 - 95.9 | 22              | 7.1  | 4.2 - 11.8 | 1.23                       | 0.573  | 0.60 - 2.50 |
| Family                                | 1,519                 | 95.9 | 94.7 - 96.9 | 65              | 4.1  | 3.1 - 5.3  | 0.89                       | 0.684  | 0.52 - 1.55 |
| Post-family                           | 2,213                 | 96.5 | 95.5 - 97.3 | 81              | 3.5  | 2.7 - 4.6  | 1.80                       | 0.097  | 0.90 - 3.60 |
| <b>Education<sup>†</sup></b>          |                       |      |             |                 |      |            |                            |        |             |
| No qualifications                     | 739                   | 97.5 | 96.0 - 98.4 | 19              | 2.6  | 1.6 - 4.0  | Reference                  |        |             |
| GCSE/O-level/CSE                      | 911                   | 94.6 | 92.6 - 96.1 | 52              | 5.4  | 3.9 - 7.4  | 1.75                       | 0.069  | 0.96 - 3.21 |
| A-level/vocational                    | 1,242                 | 93.6 | 91.9 - 94.9 | 86              | 6.5  | 5.1 - 8.1  | 1.69                       | 0.077  | 0.95 - 3.01 |
| Degree/higher degree                  | 1,396                 | 95.8 | 94.3 - 96.9 | 62              | 4.2  | 3.1 - 5.7  | 1.94                       | 0.042  | 1.02 - 3.69 |
| Other/still studying                  | 337                   | 97.9 | 95.8 - 99.0 | 7               | 2.1  | 1.0 - 4.2  | 0.88                       | 0.788  | 0.36 - 2.16 |
| <b>Social grade<sup>‡</sup></b>       |                       |      |             |                 |      |            |                            |        |             |
| AB                                    | 1,265                 | 95.9 | 94.2 - 97.1 | 54              | 4.1  | 2.9 - 5.8  | Not entered into the model |        |             |
| C1                                    | 1,267                 | 95.8 | 94.6 - 96.8 | 55              | 4.2  | 3.2 - 5.4  |                            |        |             |
| C2                                    | 1,016                 | 94.6 | 92.5 - 96.0 | 59              | 5.5  | 4.0 - 7.5  |                            |        |             |
| D                                     | 718                   | 96.4 | 94.5 - 97.6 | 27              | 3.6  | 2.4 - 5.5  |                            |        |             |
| E                                     | 382                   | 92.6 | 89.8 - 94.7 | 30              | 7.4  | 5.3 - 10.2 |                            |        |             |
| <b>Tenure<sup>†</sup></b>             |                       |      |             |                 |      |            |                            |        |             |
| Owned outright                        | 1,648                 | 97.7 | 96.7 - 98.3 | 40              | 2.4  | 1.7 - 3.3  | Reference                  |        |             |
| Bought on a mortgage                  | 1,386                 | 96.0 | 94.5 - 97.2 | 57              | 4.0  | 2.8 - 5.5  | 1.03                       | 0.918  | 0.57 - 1.88 |
| Rented from local authority           | 405                   | 93.5 | 90.4 - 95.6 | 28              | 6.5  | 4.4 - 9.6  | 2.58                       | 0.006  | 1.31 - 5.09 |
| Rented from private landlord          | 885                   | 91.5 | 89.3 - 93.3 | 82              | 8.5  | 6.7 - 10.7 | 2.33                       | 0.003  | 1.34 - 4.05 |
| Other                                 | 287                   | 94.0 | 91.0 - 96.0 | 18              | 6.0  | 4.0 - 9.0  | 2.04                       | 0.039  | 1.04 - 4.02 |
| <b>Disability<sup>†</sup></b>         |                       |      |             |                 |      |            |                            |        |             |
| Considers self disabled               | 477                   | 91.4 | 88.4 - 93.7 | 45              | 8.6  | 6.3 - 11.7 | Reference                  |        |             |
| Not disabled                          | 4,086                 | 95.8 | 95.1 - 96.5 | 178             | 4.2  | 3.5 - 4.9  | 0.37                       | <0.001 | 0.24 - 0.59 |
| <b>Employment status<sup>†</sup></b>  |                       |      |             |                 |      |            |                            |        |             |
| Employed                              | 2,535                 | 95.0 | 93.8 - 95.9 | 135             | 5.0  | 4.1 - 6.2  | Reference                  |        |             |
| Unemployed                            | 204                   | 95.0 | 91.3 - 97.2 | 11              | 5.0  | 2.8 - 8.7  | 0.62                       | 0.166  | 0.32 - 1.22 |
| Economically inactive                 | 799                   | 92.2 | 90.2 - 93.9 | 67              | 7.8  | 6.1 - 9.8  | 1.10                       | 0.654  | 0.73 - 1.66 |
| Retired                               | 1,110                 | 98.9 | 98.1 - 99.3 | 13              | 1.1  | 0.7 - 1.9  | 0.33                       | 0.018  | 0.13 - 0.83 |
| <b>AUDIT<sup>†</sup></b>              |                       |      |             |                 |      |            |                            |        |             |
| Not hazardous/harmful drinking        | 4,038                 | 96.5 | 95.7 - 97.1 | 149             | 3.6  | 2.9 - 4.3  | Reference                  |        |             |
| Hazardous/harmful drinking            | 599                   | 88.7 | 85.6 - 91.2 | 76              | 11.3 | 8.8 - 14.4 | 2.35                       | <0.001 | 1.63 - 3.40 |

Weighted N = 4,874 (bivariate analyses) and 4,698 (multivariate analysis). Bivariate totals that are 4,875 not 4,874 are due to rounding as the analyses use weighted data.

AOR: adjusted odds ratio.

<sup>†</sup>test of bivariate independence indicates significant difference (p<0.05).

<sup>‡</sup>AB is higher managerial, administrative and professional and Intermediate managerial, administrative and professional; C1 is supervisory, clerical and junior managerial, administrative and professional; C2 is skilled manual workers; D is semi-skilled and unskilled manual workers; and E is state pensioners, casual and lowest grade workers, unemployed with state benefits only.

## Perpetrators of harm

The most frequently reported perpetrators of harms were friends (23.4% of total perpetrator reports) and strangers (22.9%), while work colleagues were the least reported perpetrators (3.7%, Figure 1). The perpetrator varied according to the type of harm (Supplementary Table 3). Focussing on the most common harms experienced, being kept awake due to noise or disruption was predominantly perpetrated by strangers (49.5%, 95% CI 43.8%-55.3%), while both strangers and friends were the most common cause of feeling uncomfortable or anxious at a social occasion (strangers 34.4%, 95% CI 28.5%-40.7%;

1 friends 32.8%, 95% CI 27.2%-39.0%). Serious arguments that did not include physical  
2 violence were predominantly perpetrated by friends (35.7%, 95% CI 29.5%-42.6%) or  
3 someone the respondent was in a relationship with and lived with (23.1%, 95% CI 17.6%-  
4 29.6%). Likewise, being let down by someone or being emotionally hurt or neglected were  
5 harm types perpetrated by people close to respondents.  
6

7  
8 Strangers were most likely to be the perpetrators of two of the aggressive harms: 60.5%  
9 (95% CI 51.2%-69.1%) of respondents reporting feeling physically threatened by a  
10 stranger and 31.5% (95% CI 21.5%-43.6%) of respondents reporting being physically hurt  
11 by a stranger. While 19.0% (95% CI 6.5%-44.2%) of respondents reported being forced or  
12 pressured into sex or something sexual by a stranger, the most commonly reported  
13 perpetrator for this sexually aggressive harm was someone the respondent was in a  
14 relationship with and lived with (23.3%, 95% CI 9.8%-46.0%; rising to 39.9% when also  
15 including people in a relationship who lived elsewhere).  
16  
17

18  
19 Insert Figure 1 here.  
20

21 Breaking perpetrator type down further by sex reveals significant differences (data not  
22 reported). Focusing on aggressive harms only, of those who had experienced an  
23 aggressive harm, women were more likely than men to report the perpetrator being  
24 someone they were in a relationship with and lived with. This is true for feeling physically  
25 threatened (21.2% vs 4.1%,  $p<0.001$ ), being physically hurt (37.8% vs 6.3%,  $p<0.001$ ) and  
26 being forced or pressured into sex or something sexual (though not with statistical  
27 significance due to small numbers of people reporting this type of harm, 34.3% vs 0.0%,  
28  $p=0.077$ ). In contrast, of those who had experienced an aggressive harm, men were more  
29 likely than women to report feeling physically threatened by a stranger (71.4% vs 46.1%,  
30  $p=0.008$ ) or being physically hurt by stranger (42.2% vs 18.0%,  $p=0.036$ ).  
31  
32  
33

### 34 **Frequency of harm**

35 Figure 2 reports information on the frequency with which harms were experienced. The  
36 majority of reported harms were experienced less than once a month (74.8%); 12.8%  
37 experienced harm at least monthly but less than weekly, 7.2% experienced weekly but less  
38 than daily, and 5.2% experienced daily or almost daily.  
39  
40

41  
42 Insert Figure 2 here.  
43

44 The frequency of harm varied by harm type (Supplementary Table 4). The harm types  
45 reported to reoccur most often were those for which the description implies that the harm  
46 occurred over a prolonged period of time with someone whom the respondent was in  
47 regular contact. These included 'had to spend my personal time caring for a person with a  
48 long term health condition or disability that resulted from their current or previous drinking'  
49 (19.4% daily or almost daily, 95% CI 10.2%-33.8%) and 'had to stop seeing or being in  
50 contact with someone because of their drinking' (19.3% daily or almost daily, 95% CI  
51 11.9%-29.6%). It was less common for other harms to be experienced at a daily or almost  
52 daily frequency. Nevertheless, all harm types had at least one respondent reporting daily  
53 or almost daily frequency of harm.  
54  
55  
56  
57  
58  
59  
60

## DISCUSSION

1  
2 In this exploratory study, one in five respondents experienced AHTO in the previous 12 months.  
3 The most commonly reported AHTO were being kept awake due to noise or disruption and feeling  
4 uncomfortable or anxious at a social occasion, which have been identified as the most prevalent  
5 harms in other studies.<sup>4 5</sup> More concerning, 4.6% reported experiencing an aggressive harm.  
6 Experiencing AHTO was associated with a number of demographic and socio-economic variables.  
7 Friends and strangers were the dominant perpetrators of AHTO. Most harms occurred less than  
8 monthly but some respondents experienced harm daily or almost daily.  
9

10  
11 The main strength of this study is its large sample size; this is the largest survey on AHTO  
12 conducted in the UK and the first to provide data for England. The sampling and weighting  
13 strategy employed ensured the sample was representative of the English population and thus the  
14 generalisability of the findings. There are a number of limitations to note. Recall is always a  
15 problem with surveys; harms that occurred a year ago or had little impact on the respondent may  
16 be more difficult to recall. Attributing causality is not possible using a cross-sectional design. There  
17 are also some social groups that are systematically missing from surveys such as homeless  
18 people, those in hospital or care homes and those in prison; populations whose alcohol use is  
19 likely to be different.<sup>17</sup> Previous studies on AHTO have also largely relied on cross-sectional  
20 surveys and are affected by the same limitations. A response rate could not be calculated because  
21 Ipsos MORI did not collect the necessary data. While the total amount of missing data is small,  
22 any missing data can potentially introduce bias. There were some significant differences in the  
23 characteristics of those that answered the AHTO questions and those that did not. The internal  
24 validity of the AHTO questions used here has not been measured; in the initial search of the  
25 literature the authors failed to identify a validated survey. Consequently it is possible that  
26 discrepancies exist between the responses provided by participants and their actual experience of  
27 alcohol-related harm. Finally, ecological fallacy, where the inferences about individuals are made  
28 based upon data for a group, is also a consideration in this type of study. It is likely that systematic  
29 differences exist in harm by population sub-groups (for example by sex and ethnicity) and future  
30 work on AHTO in the UK should explore this. It is possible that the findings on factors associated  
31 with harm represent those that are associated with the most common but 'low impact' harms and  
32 cannot be generalised to more severe harms. However, the fact that we specifically examine  
33 factors associated with aggressive harms (which are the most serious harms considered)  
34 mitigates this. That said, further research to identify the factors associated with individual harms  
35 would be advantageous.  
36  
37  
38

39 In this study the prevalence of harm was 20.1%. The closest comparison is from a cross-sectional  
40 survey conducted in Wales in 2015 which used identical AHTO questions and reported the  
41 prevalence of any harm in the previous 12 months to be 59.7%.<sup>10</sup> There is some evidence from  
42 routine data to support a lower prevalence of harm in England than Wales. For example, the  
43 percentage of violent incidents where the victim believed the offender(s) to be under the influence  
44 of alcohol tends to be higher in Wales than England<sup>18</sup> although not conclusively so. However, the  
45 magnitude of the difference in the reported prevalence of harm between England and Wales  
46 seems questionable, given the similarities between the two nations. This difference could be due,  
47 in part, to differences in methodology and caution needs to be applied in drawing direct  
48 comparisons. In Wales, a free text box was included that gave participants the option to report  
49 'other alcohol-related harm' and these were included in the 'any harm' figures for Wales which  
50 would likely increase the prevalence compared to England. This approach was not undertaken in  
51 England because not all harms reported in the free text box appeared to be alcohol-related. In  
52 England the harm questions were asked after the ATS questions; this may have affected how  
53 people perceived harm, and therefore how they responded to the harm questions. It is also  
54 possible that respondents were experiencing fatigue by the end of the survey and this may have  
55 affected how fully they reported their experiences of harm. The English survey was administered  
56  
57  
58

1 face-to-face while the survey in Wales was administered via the telephone using landline  
2 numbers. Using data from the USA, researchers comparing face-to-face and telephone interviews  
3 reported that telephone surveys may miss certain sections of the population if they solely rely on  
4 landlines, including those with lower incomes.<sup>19</sup> However the Welsh survey was weighted so the  
5 data were representative of the deprivation of the general population.<sup>10</sup> Other surveys of AHTO  
6 conducted in the UK have reported the prevalence of harm in adults to be 28% in Ireland<sup>11</sup>, 51% in  
7 Scotland,<sup>9</sup> 79% in the North West of England,<sup>13</sup> however these studies used very different AHTO  
8 questions so the results are not comparable. Despite the difference in prevalence between the  
9 Welsh survey and the current study, the relative prevalence of the types of harm were similar;  
10 being kept awake at night, feeling uncomfortable or anxious at a social occasion and having a  
11 serious argument were the most prevalent harms in both surveys.

12  
13 Being a hazardous/harmful drinker increased the odds of experiencing AHTO. This is perhaps  
14 unsurprising given that drinking with other drinkers and in places where alcohol is consumed  
15 increases one's exposure to drinkers. However the association with drinking and experiencing  
16 alcohol-harm is not conclusive. A cross-sectional comparison of harm from 'heavy drinking' friends  
17 and family across five Nordic countries and Scotland reported that drinking frequency was not  
18 significantly related to experiencing harm from others but binge drinking frequency was. A higher  
19 frequency of binge drinking increased the risk of experiencing AHTO in Sweden and Norway and  
20 there was some evidence for this relationship in Finland also, but not in the other countries.<sup>7</sup> A  
21 paper using the same Norwegian data showed that the association between experiencing harm  
22 and one's own drinking was not evident for all types of harm.<sup>6</sup> Other cross-sectional surveys show  
23 an association between one's own drinking and experience of any harm,<sup>20 21</sup> including two which  
24 report a dose response relationship, with dependent/frequent risky drinkers having the greatest  
25 risk.<sup>4 22</sup>

26  
27  
28 Here, age was also associated with experiencing any harm and aggressive harm. A number of  
29 studies from a range of countries have reported that being of younger age increases the risk of  
30 being harmed from another's drinking.<sup>4-7 23</sup> However, 'younger age' in this context does not always  
31 mean 'young'; one study, for example, concluded that those aged 59 or less had a higher risk of  
32 being negatively affected by a known drinker than those aged 60 and over.<sup>7</sup> A global survey of  
33 63,725 respondents aged 18-34 years reported that those aged 18-24 years were significantly  
34 more likely to experience an aggressive AHTO than those aged 30-34 or 25-29;<sup>4</sup> similar to results  
35 reported here.

36  
37  
38 The respondent's sex was not significantly associated with experiencing harm. The literature is  
39 mixed regarding sex as a risk factor. Women were reported to be significantly more likely to  
40 experience harm than men in Finland and Sweden but not in Denmark, Iceland, Norway or  
41 Scotland.<sup>5 6</sup> Being a woman was found to be a significant risk factor for all harms and aggressive  
42 harms using data from the Global Drug Survey.<sup>4</sup> The association of sex and experiencing harm is  
43 different for different types of harm. For example women are significantly more likely than men to  
44 experience unwanted sexual attention/sexual harassment or assault,<sup>4 6</sup> whereas men are more  
45 likely to have clothing, property or other belongings damaged.<sup>4 6</sup> Survey data from the USA  
46 examined family/marriage, financial and assault harms due to drinking of a partner/spouse/family  
47 member and reported that women were more likely to report financial and family/martial harms  
48 while a higher proportion of men experienced assaults.<sup>24</sup> While examining differences in harm by  
49 sex was not the focus of this study, Supplementary Table 2 shows that such differences may exist.  
50 For example there is a clear difference between the proportion of men (2.1% 95% CI 1.6%-2.9%)  
51 and women (4.8% 95% CI 3.9%-5.8%) who reported experiencing alcohol-related emotional hurt  
52 or neglect. Such differences should be considered in future work on this topic in the UK.

53  
54  
55 Few studies have considered whether ethnic background is a risk factor for experiencing harm.  
56 Data from the USA demonstrate that the link between ethnicity and experience of harm is not  
57

conclusive (two studies show no association and one a weak association).<sup>20 23 24</sup> Here, being White British was significantly associated with experiencing harm and also aggressive harm. Most minority ethnic groups in the UK have higher rates of abstinence from alcohol and lower levels of drinking than people of white ethnicity.<sup>25</sup> However the results of the multivariate modelling presented in this study show that White British ethnicity is associated with experiencing harm and aggressive harm independently of AUDIT score.

Having a disability was also significantly associated with experiencing any harm and an aggressive harm. No previous studies on the association between having a disability and experiencing alcohol-related harm were identified. However there is good evidence to show that those with a disability are the victims of harm more generally including physical, sexual and intimate partner violence,<sup>26 27</sup> and financial hardship.<sup>28</sup>

Being in the family stage of life also lowered the odds of experiencing harm compared to being single. This is perhaps surprising given that the survey included questions which specifically asked about harms most likely caused by a family member. Evidence on the effect of relationships and household types is mixed and largely dependent on the way these are categorised and so cannot be directly compared.

Educational attainment, type of accommodation, social grade and employment status are proxy measures for socio-economic status. Literature on the effect of socio-economic status is mixed and comparisons are hindered by the multitude of different measures used in different studies. In this study social grade was not significantly associated with harm or aggressive harm in the bivariate analyses. A study in Scotland also reported no significant difference in experience of any harm according to social class.<sup>9</sup>

Here findings show that experiencing harm was significantly associated with having qualifications (compared to having none) with the greatest odds being for those with a degree or higher degree. The association between education and experience of harm in the literature is mixed. Data from two national surveys (Denmark<sup>29</sup> and the USA<sup>20</sup>) showed no clear association between experiencing harm and education level. Data from the Global Drug Survey showed no association between education and experience of harm or aggressive harm but there was an association between education and experiencing particular types of harm.<sup>4</sup> However, a comparison of northern European countries reported that a significantly higher proportion of respondents with high school/university education experienced harm than those with elementary education in four of the six countries considered.<sup>5</sup> Those with higher educational attainment were more likely to experience any harm in a Canadian study.<sup>30</sup>

The current study shows that being retired lowers the odds of experiencing harm and aggressive harm compared to all other employment statuses. This association was independent of age. The odds of being harmed did not differ significantly between those who were employed and not employed. A cross-sectional survey in Canada also reported that those who were retired were least likely to experience harm.<sup>30</sup> Data from two surveys conducted in the USA show that those who were unemployed were significantly more likely to experience AHTO than those who were employed.<sup>23 24</sup> Data from Denmark show that employment might be significantly associated with experiencing harm but no conclusive results were provided and the wide confidence intervals show that estimates lacked precision.<sup>29</sup> Conversely, data from the USA reported no association between experiencing any harm and employment status.<sup>20</sup>

Here, compared to those that owned their home outright, those who rented from a private landlord had significantly greater odds of experiencing harm and those who rented from the local authority or rented from a private landlord had significantly greater odds of experiencing an aggressive harm. No previous studies on the association between type of accommodation tenure and

1 experiencing alcohol-related harm were identified. It is possible that those who rent represent a  
2 more transitory, poor and vulnerable population which increases their risk of harm. Research not  
3 specifically related to alcohol shows that those living in unstable housing (for example living on the  
4 streets, in temporary sheltered accommodation or with relatives or friends) experience relatively  
5 high rates of victimisation,<sup>31 32</sup> while data from national surveys in Great Britain show that being  
6 the victim of domestic property crimes is higher among those that rent (including those in the  
7 private-rented sector) than those who own their own homes.<sup>33</sup>

8 How exactly socio-economic status influences the experience of harm is not clear from our  
9 findings. Neither social grade nor employment status (excepting retirement) were associated with  
10 AHTO in our study. Education, as a proxy of earning potential, was associated with AHTO, but  
11 there was no significant variation between the groups GCSE/O-level/CSE, A-level/vocational and  
12 degree/higher degree. No clear picture of the association between experience of harm and socio-  
13 economic status emerges from the literature either. A comparable study of AHTO in Wales  
14 reported no association between experience of any harm and area-level deprivation.<sup>10</sup> It is  
15 possible that more sensitive methods are needed to fully explore the relationship between socio-  
16 economic status and AHTO, and any patterns in relation to particular types of harm.

17  
18  
19 In the UK, there are cultural differences in drinking behaviour and some of these are reflected in  
20 our AHTO findings (such as differences between ethnic groups).<sup>34</sup> However, other socio-cultural  
21 variations are not easily identified in our findings. For example, while national survey data show  
22 that people have different drinking habits across income levels (people on higher incomes tend to  
23 drink more<sup>34</sup>), this pattern is not reflected in our findings on socio-economic status.

24  
25  
26 This study identified friends and strangers as the dominant perpetrators making up around 46% of  
27 all reports, though the perpetrator varied depending on type of harm. For example, family  
28 members made up a larger proportion of perpetrators of harms such as stopping seeing someone  
29 or having to care for someone because of their drinking. While differences by sex were not the  
30 focus of this paper, and were not investigated in detail, investigating perpetrator type by sex for  
31 aggressive harms revealed significant differences (data not reported). Women were more likely to  
32 be physically hurt and forced or pressured into something sexual by someone they were in a  
33 relationship with. In contrast, for men, strangers were the most likely perpetrators of being hurt  
34 physically and feeling threatened. These findings are in line with data from England and Wales on  
35 the relationship between offender and perpetrator,<sup>35</sup> and from previous research. A study in the  
36 US using the 2010 National Alcohol Survey reported that men were more likely to be assaulted in  
37 bar fights by strangers while women were more likely to be (sexually) assaulted by other drinkers  
38 (partners or acquaintances) within a more private setting.<sup>36</sup> The context within which drinking  
39 occurs is therefore relevant in relation to exploring differences in AHTO by sex.

40  
41  
42 While three quarters of harms were experienced less than monthly, 5.2% were experienced daily  
43 or almost daily indicating a considerable burden of alcohol-related harm for a section of the  
44 population. The frequency of experiencing harm was largely dependent on the type of harm.  
45 Harms with the highest frequency of daily/almost daily reports were those which occurred over a  
46 prolonged period of time and/or implied frequent contact with the perpetrator such as caring for  
47 someone with a long-term health condition or disability that results from them drinking. Data from  
48 two surveys suggest that exposure to heavy drinkers is associated with poorer health, wellbeing  
49 and quality of life.<sup>37 38</sup>

50  
51  
52 To conclude, this is the largest ever survey of AHTO conducted within the UK and the first national  
53 study in England. It is clear that AHTO is relatively prevalent and that some individuals experience  
54 harm frequently. The most prevalent harms could be considered insignificant but even apparently  
55 minor harms such as sleep disruption can have an impact on health and quality of life,<sup>39</sup>  
56 particularly if experienced persistently. It is difficult to compare results with the literature because  
57

of the diversity of methods being employed. In order to support temporal and geographic comparisons it would be advantageous for studies to use a consistent methodology including the sampling and data collection methods, in addition to the harm questions. The WHO ThaiHealth project has designed a survey to measure AHTO in order to facilitate international comparisons<sup>40</sup> but unfortunately authors were not aware of this when they began the current study. While lengthy, using this would be a good way to develop a comprehensive and consistent evidence base. However it is clear that there are differences across harm types and more detailed analysis of specific harms would be valuable for supporting remedial action from policymakers. Here we consider 'aggressive harms' as a distinctive group of harms; future research could consider other harm groupings in order to provide a more detailed assessment of specific harm types. Research on the types of alcohol consumption patterns that increase the likelihood of experiencing AHTO in the UK would be valuable. Understanding what puts younger adults at increased risk could be a useful focus for future research as it might identify the contextual factors which make experiencing harm more likely. Further focus on the differences in harm by sex would also be advantageous as there is little data on this in relation to the UK. Policy to address AHTO is less well developed than policy that seeks to address harms to the drinker; exceptions include crime and violence and harm to the unborn foetus which have been included in previous Government's Alcohol Strategy.<sup>42</sup> Given that AHTO research is in its early stages it is too early to advocate a detailed policy response but results presented here will be of interest to policy makers to help understand the wider impact of other people's drinking.

## ACKNOWLEDGEMENTS

The authors would like to thank the alcohol expert forum of the Five Nations Public Health Peer Network for initiating this work and to PHE for funding it. Thanks also to the following people in PHE: Craig Timpson for quality assuring the analyses, Helen Outhwaite for help with searching for literature, Robyn Burton and Helen Willey for their input into early conversations about methods and Fionnuala O'Toole and Alyson Jones for proof reading/editing the paper. Thanks to Dr Jamie Brown, University College London, for permitting the harm to others questions to be appended to the ATS and for his subsequent support with interpretation of the alcohol toolkit survey questions. Thanks to Ipsos MORI for delivering the survey, in particular Stuart Smedley. Finally, thanks for the four reviewers for their comments on this paper.

## COMPETING INTERESTS

None declared.

## FUNDING

The work was funded by Public Health England.

## AUTHORS' CONTRIBUTIONS

CB provided day to day management of the study, helped design the questionnaire and wrote the first draft. DB did the analysis and helped to write the first draft. JM undertook a review of the literature. KS was involved with the initiation, helped design the questionnaire and provided statistical support. CP was involved with the initiation of the study. CH was involved with the

1 initiation of the study and helped design the questionnaire. All authors reviewed and helped to  
2 revise successive drafts and approved the final version of the manuscript.  
3

#### 4 **DATA SHARING AGREEMENT**

5 Sharing of data will be considered by PHE and UCL on a case-by-case basis. Please contact the  
6 lead author for further details.  
7  
8  
9  
10  
11  
12  
13  
14  
15  
16  
17  
18  
19  
20  
21  
22  
23  
24  
25  
26  
27  
28  
29  
30  
31  
32  
33  
34  
35  
36  
37  
38  
39  
40  
41  
42  
43  
44  
45  
46  
47  
48  
49  
50  
51  
52  
53  
54  
55  
56  
57  
58  
59  
60

For peer review only



## REFERENCES

1. World Health Organization. Global status report on alcohol and health. Geneva: World Health Organization, 2014.
2. World Health Organization. Global strategy to reduce the harmful use of alcohol. Geneva: World Health Organization, 2010.
3. Office for National Statistics. Chapter 5: Violent crime and sexual offences - alcohol-related violence. London: Office for National Statistics, 2015.
4. Bellis M, Quigg Z, Hughes K, et al. Harm from other people's drinking: an international survey of their occurrence, impacts on feeling safe and legislation relating to their control. *BMJ Open* 2015;5
5. Moan I, Storvoll E, Sundin E, et al. Experienced harm from other people's drinking: a comparison of Northern European countries. *Substance Abuse Research and Treatment* 2015;9(S(2)):45-57.
6. Storvoll E, Moan I, Lund I. Negative consequences of other people's drinking: prevalence, perpetrators and locations. *Drug and Alcohol Review* 2016;2016
7. Ramstedt M, Sundin E, Moan I, et al. Harm experienced from the heavy drinking of family and friends in the general population: A comparative study of six northern European countries. *Substance Abuse Research and Treatment* 2015;9(S2)
8. Burton R, Henn C, Lavoie D, et al. A rapid evidence review of the effectiveness and cost-effectiveness of alcohol policies: an English perspective. *The Lancet* 2016 doi: [http://dx.doi.org/10.1016/S0140-6736\(16\)32420-5](http://dx.doi.org/10.1016/S0140-6736(16)32420-5)
9. Hope A, Curran J, Bell G, et al. Unrecognised and under-reported: the impact of alcohol on people other than the drinker in Scotland. Glasgow: Alcohol Focus Scotland, 2013.
10. Quigg Z, Bellis AM, Grey H, et al. Alcohol's harms to others: the harms from other people's alcohol consumption in Wales. Cardiff: Public Health Wales, 2016.
11. Hope A. Alcohol's harm to others in Ireland. Dublin: Health Service Executive, 2014.
12. Beard E, Brown J, West R, et al. Protocol for a national monthly survey of alcohol use in England with 6-month follow up: 'The Alcohol Toolkit Survey'. *BMC Public Health* 2015;15:230.
13. Gell L, Ally A, Buykx P, et al. Alcohol's harm to others. Sheffield: The University of Sheffield, 2015.
14. Barbor T, Higgins-Biddle J, Saunders J, et al. AUDIT: The alcohol use disorders identification test, guidelines for use in primary care. 2nd edition. Geneva: World Health Organization, 2001.
15. StataCorp. Stata survey data reference manual: release 13. Texas: StataCorp LP, 2013.
16. Rao J, Scott A. On chi-squared tests for multiway contingency tables with cell proportions estimated from survey data. *Annals of Statistics* 1981;12:46-60.
17. Johnson T. Sources of error in substance use prevalence surveys. *International Scholarly Research Notices* 2014;2014 doi: <http://dx.doi.org/10.1155/2014/923290>
18. Office for National Statistics. Estimates of violent incidents where the victim believed the offender(s) to be under the influence of alcohol or drugs in England and Wales, year ending March 2006 to year ending March 2016 Crime Survey for England and Wales, 2017.
19. Greenfield T, Midanik L, Rogers J. Effects of telephone versus face-to-face interview models on reports of alcohol consumption. *Addiction* 2000;95(2):277-84.
20. Greenfield K, Ye Y, Kerr W, et al. Externalities from alcohol consumption in the 2005 US National Alcohol Survey: implications for policy. *International Journal of Environmental Research and Public Health* 2009;6:3205-24.
21. Stanesby O, Rankin G, Callinan S. Experience of harm from others' drinking and support for stricter alcohol policies: Analysis of the Australian National Drug Strategy Household Survey. *International Journal of Drug Policy* 2017;45:25-32.

22. Ferris J, Devaney M, Davis G, et al. Reporting of problematic drinkers and the harm they cause: assessing the role of alcohol use, sex, and age of those affected by a problematic drinker. *Experimental and Clinical Psychopharmacology* 2016;24(1):48-54.
23. Karriker-Jaffe K, Greenfield T. Gender differences in associations of neighbourhood disadvantage with alcohol's harms to others: a cross-sectional study from the United States. *Drug and Alcohol Review* 2014;33(3):296-303.
24. Greenfield T, Karriker-Jaffe K, Kaplan L, et al. Trends in alcohol's harms to others (AHTO) and co-occurrence of family-related AHTO: the four US National Alcohol Surveys, 2000-2015. *Substance Abuse Research and Treatment* 2015;2015(9(S2)):23-31.
25. Hurcombe R, Bayley M, Goodman A. Ethnicity and alcohol: a review of the UK literature. York: Joseph Rowntree Foundation, 2010.
26. Hughes K, Bellis AM, Jones L, et al. Prevalence and risk of violence against adults with disabilities: a systematic review and meta-analysis of observational studies. *The Lancet* 2012;379(9826):1621-29.
27. Krnjacki L, Emerson E, Llewellyn G, et al. Prevalence and risk of violence against people with and without disabilities: Findings from an Australian population-based study. *Violence and Trauma* 2015;40(1):16-21.
28. Frier A, Barnett F, Devine S, et al. Understanding disability and the 'social determinants of health': how does disability affect people's social determinants of health? *Disability and Rehabilitation* 2016;40(5):538-47.
29. Seid A, Grittner U, Greenfield T, et al. To cause harm and to be harmed by others: new perspectives on alcohol's harm to others. *Substance Abuse Research and Treatment* 2015;2015(S2):13-22.
30. Lewis-Laietmark C, Wettlaufer A, Shield K, et al. The effects of alcohol-related harms to others on self-perceived mental well-being in a Canadian sample. *International Journal of Public Health* 2017;62:669-78.
31. Kushel M, Evans J, Perry S. Victimization among homeless and marginally housed persons. *Archives of Internal Medicine* 2003;163(20):2492-99.
32. Nyamathi A, Leake B, Gelberg L. Sheltered versus nonsheltered homeless women: Differences in health, behavior, victimisation and utilization of care. *Journal of General Internal Medicine* 2000;15(8):565-72.
33. Farrall S, Hay C, Gray E. Thatcherite ideology, housing tenure and crime: The socio-spatial consequences of the right to buy for domestic property crime. *The British Journal of Criminology* 2016;56(1):1235-52.
34. Office for National Statistics. Adult drinking habits in Great Britain: 2017. Newport: Office for National Statistics, 2018.
35. Office for National Statistics. Overview of violent crime and sexual offences. Newport: Office for National Statistics, 2016.
36. Kaplan L, Karriker-Jaffe J, Greenfield K. Drinking context and alcohol's harm from others among men and women in the US National Alcohol Survey. *Journal of Substance Use* 2017;22(4):412-18.
37. Casswell S, You R, Huckle T. Alcohol's harm to others: reduced wellbeing and health status for those with heavy drinkers in their lives. *Addiction* 2011;106(6):1087-94.
38. Jiang H, Callinan S, Laslett A, et al. Correlates of caring for the drinkers and others among those harmed by another's drinking. *Drug and Alcohol Review* 2015;34:162-69.
39. Muzet A. Environmental noise, sleep and health. *Sleep medicine reviews* 2007;12(2):135-42.
40. World Health Organization/ThaiHealth International Collaboration Research Project. The Harm to Others from Drinking. Geneva: World Health Organization, 2012.
41. Callinan S, Laslett A, Rekve D, et al. Alcohol's harm to others: An international collaborative project. *International Journal of Alcohol and Drug Research* 2016;5(2):25-32.
42. HM Government. The Government's Alcohol Strategy. London: HM Government, 2012.

1  
2  
3 Figure Legends  
4

5 Figure 1: Perpetrators as a percentage of all reported harms to others,  
6 weighted data  
7

8 Weighted N = 2,522 (represents the total number of perpetrators across all harms).  
9  
10

11  
12 Figure 2: Frequency of all reported harms to others, weighted data  
13

14 Weighted N = 2,052 (represents the total number of harms across all individuals).  
15  
16  
17  
18  
19  
20  
21  
22  
23  
24  
25  
26  
27  
28  
29  
30  
31  
32  
33  
34  
35  
36  
37  
38  
39  
40  
41  
42  
43  
44  
45  
46  
47  
48  
49  
50  
51  
52  
53  
54  
55  
56  
57  
58  
59  
60

For peer review only

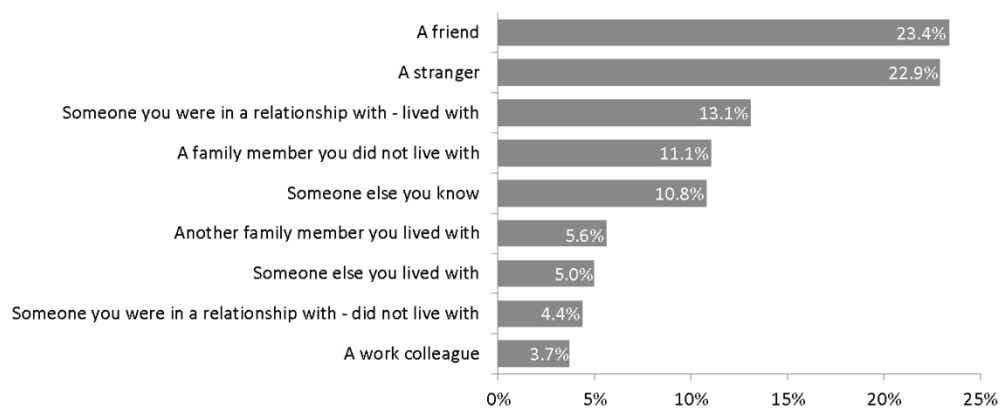

Figure 1: Perpetrators as a percentage of all reported harms to others

364x149mm (300 x 300 DPI)

1  
2  
3  
4  
5  
6  
7  
8  
9  
10  
11  
12  
13  
14  
15  
16  
17  
18  
19  
20  
21  
22  
23  
24  
25  
26  
27  
28  
29  
30  
31  
32  
33  
34  
35  
36  
37  
38  
39  
40  
41  
42  
43  
44  
45  
46  
47  
48  
49  
50  
51  
52  
53  
54  
55  
56  
57  
58  
59  
60

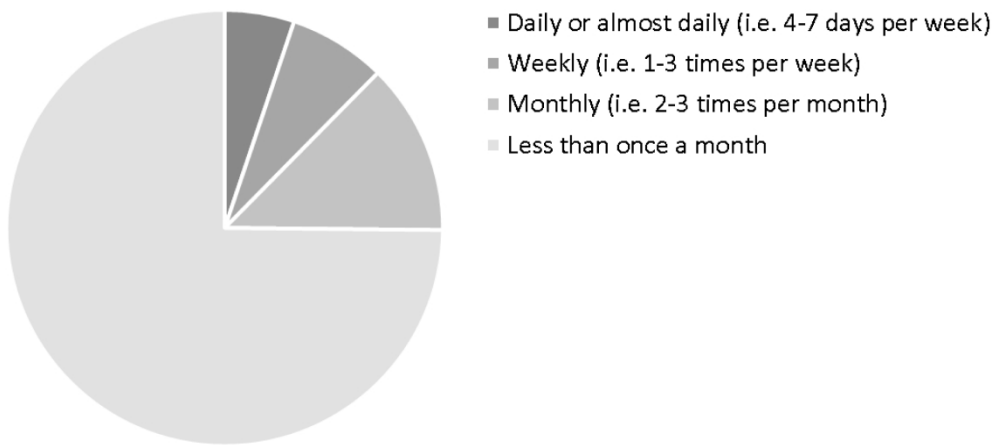

Figure 2: Frequency of all reported harms to others  
292x132mm (300 x 300 DPI)

Supplementary Table 1: Examination of missing data, non-weighted data

| Independent variable                        | Included (AHTO questions answered) |      | Excluded (AHTO questions not answered) |     | p value |
|---------------------------------------------|------------------------------------|------|----------------------------------------|-----|---------|
|                                             | N                                  | %    | N                                      | %   |         |
| <i>Sex (N = 5,068)</i>                      |                                    |      |                                        |     |         |
| Female                                      | 2,397                              | 96.9 | 76                                     | 3.1 | 0.023   |
| Male                                        | 2,484                              | 95.7 | 111                                    | 4.3 |         |
| <i>Age band (N = 5,608)</i>                 |                                    |      |                                        |     |         |
| 16-24                                       | 789                                | 97.4 | 21                                     | 2.6 | 0.111   |
| 25-44                                       | 1,460                              | 96.3 | 56                                     | 3.7 |         |
| 45-64                                       | 1,435                              | 95.5 | 68                                     | 4.5 |         |
| 65+                                         | 1,197                              | 96.6 | 42                                     | 3.4 |         |
| <i>Broad ethnic group (N = 5,040)</i>       |                                    |      |                                        |     |         |
| White British                               | 3,603                              | 96.2 | 142                                    | 3.8 | 0.125   |
| Other White groups                          | 393                                | 98.3 | 7                                      | 1.8 |         |
| Black groups                                | 262                                | 95.6 | 12                                     | 4.4 |         |
| Asian groups                                | 539                                | 97.3 | 15                                     | 2.7 |         |
| Other groups                                | 63                                 | 94.0 | 4                                      | 6.0 |         |
| <i>Life stage (N = 5,067)</i>               |                                    |      |                                        |     |         |
| Single                                      | 716                                | 97.4 | 19                                     | 2.6 | 0.150   |
| Pre-family                                  | 260                                | 95.9 | 11                                     | 4.1 |         |
| Family                                      | 1,473                              | 96.7 | 50                                     | 3.3 |         |
| Post family                                 | 2,431                              | 95.8 | 107                                    | 4.2 |         |
| <i>Education (5,039)</i>                    |                                    |      |                                        |     |         |
| No qualifications                           | 866                                | 97.2 | 25                                     | 2.8 | 0.075   |
| GCSE/O-level/CSE                            | 952                                | 95.9 | 41                                     | 4.1 |         |
| A-level/vocational                          | 1,334                              | 97.2 | 39                                     | 2.8 |         |
| Degree/higher degree                        | 1,335                              | 95.4 | 64                                     | 4.6 |         |
| Other/still studying                        | 368                                | 96.1 | 15                                     | 3.9 |         |
| <i>Social grade<sup>†</sup> (N = 5,068)</i> |                                    |      |                                        |     |         |
| AB                                          | 1,081                              | 96.2 | 43                                     | 3.8 | 0.134   |
| C1                                          | 1,554                              | 95.8 | 68                                     | 4.2 |         |
| C2                                          | 947                                | 96.7 | 32                                     | 3.3 |         |
| D                                           | 757                                | 97.7 | 18                                     | 2.3 |         |
| E                                           | 542                                | 95.4 | 26                                     | 4.6 |         |
| <i>Tenure (N = 5,027)</i>                   |                                    |      |                                        |     |         |
| Owned outright                              | 1,729                              | 97.5 | 45                                     | 2.5 | <0.001  |
| Bought on a mortgage                        | 1,124                              | 95.4 | 54                                     | 4.6 |         |
| Rented from local authority                 | 568                                | 95.5 | 27                                     | 4.5 |         |
| Rented from private landlord                | 1,029                              | 97.0 | 32                                     | 3.0 |         |
| Other                                       | 392                                | 93.6 | 27                                     | 6.4 |         |
| <i>Disability (N = 4,956)</i>               |                                    |      |                                        |     |         |
| Considers self disabled                     | 571                                | 94.4 | 34                                     | 5.6 | 0.002   |
| Not disabled                                | 4,213                              | 96.8 | 138                                    | 3.2 |         |
| <i>Employment status (N = 5,066)</i>        |                                    |      |                                        |     |         |
| Employed                                    | 2,306                              | 95.9 | 98                                     | 4.1 | 0.121   |
| Unemployed                                  | 237                                | 98.8 | 3                                      | 1.3 |         |
| Economically inactive                       | 1,009                              | 96.1 | 41                                     | 3.9 |         |
| Retired                                     | 1,327                              | 96.7 | 45                                     | 3.3 |         |
| <i>AUDIT (N = 5,044)</i>                    |                                    |      |                                        |     |         |
| Not hazardous/harmful drinking              | 4,215                              | 96.7 | 142                                    | 3.3 | 0.003   |
| Hazardous/harmful drinking                  | 649                                | 94.5 | 38                                     | 5.5 |         |

N = 5,068 (totals for independent variables will not equal 5,068 where the person did not provide responses to the AHTO questions and the independent variable.

<sup>†</sup>AB is higher managerial, administrative and professional and Intermediate managerial, administrative and professional; C1 is supervisory, clerical and junior managerial, administrative and professional; C2 is skilled manual workers; D is semi-skilled and unskilled manual workers; and E is state pensioners, casual and lowest grade workers, unemployed with state benefits only.

Supplementary Table 2: Prevalence of harm in the previous 12 months by sex, weighted data

| Harm type                                                                                                                                               | Number of respondents who experienced harm |       | Percentage of respondents who experienced harm |                |
|---------------------------------------------------------------------------------------------------------------------------------------------------------|--------------------------------------------|-------|------------------------------------------------|----------------|
|                                                                                                                                                         | Men                                        | Women | Men (95% CI)                                   | Women (95% CI) |
| Been kept awake due to noise or disruption                                                                                                              | 177                                        | 213   | 7.5 (6.3-8.8)                                  | 8.5 (7.4-9.8)  |
| Felt uncomfortable or anxious at a social occasion (e.g. a party)                                                                                       | 160                                        | 171   | 6.8 (5.7-8.0)                                  | 6.8 (5.8-8.0)  |
| Had a serious argument that did NOT include physical violence                                                                                           | 129                                        | 147   | 5.4 (4.6-6.6)                                  | 5.8 (4.9-6.9)  |
| Been let down by someone due to them failing to do something that I was counting on them to do because of their drinking                                | 82                                         | 92    | 3.5 (2.7-4.4)                                  | 3.7 (3.0-4.6)  |
| Been emotionally hurt or neglected                                                                                                                      | 50                                         | 120   | 2.1 (1.6-2.9)                                  | 4.8 (3.9-5.8)  |
| Felt physically threatened                                                                                                                              | 95                                         | 69    | 4.0 (3.2-5.1)                                  | 2.7 (2.1-3.6)  |
| Had to stop seeing or being in contact with someone because of their drinking                                                                           | 47                                         | 73    | 2.0 (1.4-2.7)                                  | 2.9 (2.3-3.7)  |
| Had to contact the police                                                                                                                               | 56                                         | 62    | 2.4 (1.8-3.2)                                  | 2.5 (1.9-3.2)  |
| Had someone break or damage something that mattered to me                                                                                               | 52                                         | 43    | 2.2 (1.6-3.0)                                  | 1.7 (1.2-2.4)  |
| Been physically hurt due to them assaulting me or acting violently                                                                                      | 50                                         | 42    | 2.1 (1.5-2.9)                                  | 1.7 (1.2-2.3)  |
| Been put at risk in a car when someone was driving after drinking                                                                                       | 37                                         | 38    | 1.6 (1.1-2.3)                                  | 1.5 (1.1-2.1)  |
| Felt genuinely concerned that they may cause harm to my children or someone else's children                                                             | 18                                         | 43    | 0.7 (0.4-1.3)                                  | 1.7 (1.3-2.4)  |
| Had to spend my personal time caring for a person with a long term health condition or disability that resulted from their current or previous drinking | 24                                         | 33    | 1.0 (0.7-1.6)                                  | 1.3 (0.9-1.9)  |
| Been physically hurt due to them accidentally injuring me (e.g. by falling on me)                                                                       | 16                                         | 37    | 0.7 (0.4-1.2)                                  | 1.5 (1.0-2.1)  |
| Had money that would have improved the quality of my life spent on their alcohol-related purchases                                                      | 18                                         | 32    | 0.8 (0.5-1.2)                                  | 1.3 (0.9-1.9)  |
| Drank alcohol myself in order to cope with the problems caused by their drinking                                                                        | 19                                         | 14    | 0.8 (0.5-1.3)                                  | 0.5 (0.3-1.0)  |
| Felt forced or pressured into sex or something sexual                                                                                                   | 12                                         | 20    | 0.5 (0.3-0.9)                                  | 0.8 (0.5-1.3)  |
| Had to move out of my usual place of residence and stay somewhere else                                                                                  | 9                                          | 16    | 0.4 (0.2-0.8)                                  | 0.6 (0.4-1.1)  |

Weighted N = 4,874.

Supplementary Table 3: Perpetrator of harm by harm type (continued on the next page), weighted data

| Harm type                                                                                                                                               |     | A friend |      |           | A stranger |      |           | Someone you were in a relationship with (e.g. wife/husband, partner) who you lived with |      |           | A family member you did not live with |      |           |
|---------------------------------------------------------------------------------------------------------------------------------------------------------|-----|----------|------|-----------|------------|------|-----------|-----------------------------------------------------------------------------------------|------|-----------|---------------------------------------|------|-----------|
|                                                                                                                                                         |     | n        | %    | 95% CI    | n          | %    | 95% CI    | n                                                                                       | %    | 95% CI    | n                                     | %    | 95% CI    |
| Been kept awake due to noise or disruption                                                                                                              | No  | 314      | 84.8 | 80.3-88.4 | 187        | 50.5 | 44.7-56.2 | 346                                                                                     | 93.3 | 89.8-95.7 | 359                                   | 97.0 | 94.5-98.4 |
|                                                                                                                                                         | Yes | 56       | 15.2 | 11.6-19.7 | 183        | 49.5 | 43.8-55.3 | 25                                                                                      | 6.7  | 4.3-10.2  | 11                                    | 3.0  | 1.6-5.5   |
| Felt uncomfortable or anxious at a social occasion (e.g. a party)                                                                                       | No  | 205      | 67.2 | 61.0-72.8 | 200        | 65.6 | 59.3-71.5 | 280                                                                                     | 91.7 | 87.4-94.6 | 271                                   | 88.9 | 84.3-92.3 |
|                                                                                                                                                         | Yes | 100      | 32.8 | 27.2-39.0 | 105        | 34.4 | 28.5-40.7 | 25                                                                                      | 8.3  | 5.4-12.6  | 34                                    | 11.1 | 7.7-15.7  |
| Had a serious argument that did NOT include physical violence                                                                                           | No  | 167      | 64.3 | 57.5-70.5 | 225        | 86.8 | 81.4-90.8 | 199                                                                                     | 76.9 | 70.4-82.4 | 216                                   | 83.5 | 77.7-88.0 |
|                                                                                                                                                         | Yes | 93       | 35.7 | 29.5-42.6 | 34         | 13.2 | 9.2-18.6  | 60                                                                                      | 23.1 | 17.6-29.6 | 43                                    | 16.5 | 12.0-22.3 |
| Been let down by someone due to them failing to do something that I was counting on them to do because of their drinking                                | No  | 95       | 56.6 | 48.1-64.7 | 162        | 96.4 | 91.9-98.5 | 136                                                                                     | 81.1 | 73.5-86.9 | 137                                   | 81.4 | 74.1-87.0 |
|                                                                                                                                                         | Yes | 73       | 43.5 | 35.4-51.9 | 6          | 3.6  | 1.5-8.1   | 32                                                                                      | 18.9 | 13.1-26.5 | 31                                    | 18.6 | 13.0-25.9 |
| Been emotionally hurt or neglected                                                                                                                      | No  | 115      | 72.5 | 64.0-79.6 | 150        | 94.3 | 88.7-97.2 | 121                                                                                     | 76.1 | 67.7-82.9 | 116                                   | 72.7 | 64.2-79.8 |
|                                                                                                                                                         | Yes | 44       | 27.6 | 20.5-36.0 | 9          | 5.7  | 2.8-11.3  | 38                                                                                      | 23.9 | 17.1-32.3 | 43                                    | 27.3 | 20.2-35.8 |
| Felt physically threatened                                                                                                                              | No  | 130      | 84.6 | 77.0-90.0 | 61         | 39.5 | 30.9-48.8 | 136                                                                                     | 88.5 | 82.2-92.8 | 145                                   | 94.5 | 89.6-97.2 |
|                                                                                                                                                         | Yes | 24       | 15.4 | 1.0-23.0  | 93         | 60.5 | 51.2-69.1 | 18                                                                                      | 11.5 | 7.2-17.8  | 8                                     | 5.5  | 2.8-10.5  |
| Had to stop seeing or being in contact with someone because of their drinking                                                                           | No  | 71       | 62.4 | 52.3-71.6 | 109        | 95.6 | 88.8-98.4 | 92                                                                                      | 80.6 | 71.2-87.4 | 86                                    | 75.9 | 66.1-83.6 |
|                                                                                                                                                         | Yes | 43       | 37.6 | 28.4-47.7 | 5          | 4.4  | 1.6-11.2  | 22                                                                                      | 19.4 | 12.6-28.8 | 27                                    | 24.1 | 16.4-33.9 |
| Had to contact the police                                                                                                                               | No  | 96       | 89.5 | 81.3-94.3 | 59         | 55.3 | 44.3-65.8 | 93                                                                                      | 87.0 | 79.0-92.2 | 95                                    | 88.8 | 79.1-94.3 |
|                                                                                                                                                         | Yes | 11       | 10.5 | 5.7-18.7  | 48         | 44.7 | 34.2-55.7 | 14                                                                                      | 13.0 | 7.8-21.0  | 12                                    | 11.2 | 5.7-20.9  |
| Had someone break or damage something that mattered to me                                                                                               | No  | 50       | 55.8 | 43.0-67.9 | 82         | 90.9 | 82.1-95.6 | 75                                                                                      | 82.8 | 72.5-89.8 | 82                                    | 90.8 | 82.1-95.5 |
|                                                                                                                                                         | Yes | 40       | 44.2 | 32.1-57.0 | 8          | 9.1  | 4.4-17.9  | 16                                                                                      | 17.2 | 10.2-27.5 | 8                                     | 9.2  | 4.5-17.9  |
| Been physically hurt due to them assaulting me or acting violently                                                                                      | No  | 71       | 85.4 | 74.7-92.0 | 57         | 68.5 | 56.4-78.5 | 66                                                                                      | 79.8 | 69.2-87.4 | 73                                    | 88.1 | 76.8-94.3 |
|                                                                                                                                                         | Yes | 12       | 14.7 | 8.0-25.3  | 26         | 31.5 | 21.5-43.6 | 17                                                                                      | 20.2 | 12.6-30.8 | 10                                    | 11.9 | 5.7-23.2  |
| Been put at risk in a car when someone was driving after drinking                                                                                       | No  | 46       | 66.7 | 54.0-77.4 | 52         | 75.5 | 61.6-85.6 | 62                                                                                      | 89.5 | 78.5-95.2 | 66                                    | 96.1 | 87.9-98.8 |
|                                                                                                                                                         | Yes | 23       | 33.3 | 22.6-46.0 | 17         | 24.5 | 14.4-38.4 | 7                                                                                       | 10.5 | 4.8-21.5  | 3                                     | 4.0  | 1.2-12.1  |
| Felt genuinely concerned that they may cause harm to my children or someone else's children                                                             | No  | 47       | 91.1 | 77.3-96.9 | 39         | 77.1 | 62.5-87.2 | 45                                                                                      | 87.4 | 75.3-94.0 | 41                                    | 80.9 | 65.9-90.2 |
|                                                                                                                                                         | Yes | 5        | 8.9  | 3.1-22.7  | 12         | 22.9 | 12.8-37.5 | 6                                                                                       | 12.6 | 6.0-24.7  | 10                                    | 19.2 | 9.8-34.1  |
| Had to spend my personal time caring for a person with a long term health condition or disability that resulted from their current or previous drinking | No  | 41       | 75.7 | 60.0-86.6 | 51         | 94.6 | 85.4-98.1 | 47                                                                                      | 87.5 | 73.5-94.6 | 34                                    | 62.4 | 47.2-75.5 |
|                                                                                                                                                         | Yes | 13       | 24.3 | 13.4-40.0 | 3          | 5.4  | 1.9-14.6  | 7                                                                                       | 12.5 | 5.4-26.5  | 20                                    | 37.6 | 24.5-52.8 |
| Been physically hurt due to them accidentally injuring me (e.g. by falling on me)                                                                       | No  | 30       | 59.5 | 43.6-73.5 | 32         | 62.5 | 46.3-76.2 | 44                                                                                      | 87.2 | 74.1-94.2 | 44                                    | 86.6 | 72.0-94.2 |
|                                                                                                                                                         | Yes | 21       | 40.5 | 26.5-56.4 | 19         | 37.6 | 23.8-53.7 | 7                                                                                       | 12.8 | 5.8-25.9  | 7                                     | 13.4 | 5.8-28.0  |
| Had money that would have improved the quality of my life spent on their alcohol-related purchases                                                      | No  | 29       | 63.0 | 46.6-76.8 | 44         | 97.1 | 80.6-99.6 | 30                                                                                      | 66.5 | 49.1-80.4 | 40                                    | 89.1 | 72.6-96.2 |
|                                                                                                                                                         | Yes | 17       | 37.0 | 23.2-53.4 | 1          | 3.0  | 0.4-19.4  | 15                                                                                      | 33.5 | 19.6-50.9 | 5                                     | 10.9 | 3.8-27.4  |
| Drank alcohol myself in order to cope with the problems caused by their drinking                                                                        | No  | 22       | 75.7 | 54.3-89.1 | 27         | 93.4 | 70.9-98.8 | 22                                                                                      | 76.9 | 53.4-90.6 | 25                                    | 86.0 | 62.0-95.9 |
|                                                                                                                                                         | Yes | 7        | 24.3 | 10.9-45.7 | 2          | 6.6  | 1.2-29.1  | 7                                                                                       | 23.1 | 9.4-46.6  | 4                                     | 14.0 | 4.1-38.0  |
| Felt forced or pressured into sex or something sexual                                                                                                   | No  | 22       | 80.3 | 58.5-92.2 | 22         | 81.0 | 55.8-93.5 | 21                                                                                      | 76.7 | 54.0-90.2 | 26                                    | 95.8 | 72.8-99.5 |
|                                                                                                                                                         | Yes | 5        | 19.7 | 7.8-41.5  | 5          | 19.0 | 6.5-44.2  | 6                                                                                       | 23.3 | 9.8-46.0  | 1                                     | 4.2  | 0.5-27.2  |
| Had to move out of my usual place of residence and stay somewhere else                                                                                  | No  | 18       | 82.9 | 62.3-93.4 | 20         | 94.1 | 74.7-98.8 | 12                                                                                      | 55.3 | 31.0-77.3 | 20                                    | 95.4 | 80.5-99.0 |
|                                                                                                                                                         | Yes | 4        | 17.1 | 6.6-37.7  | 1          | 5.9  | 1.2-25.3  | 10                                                                                      | 44.7 | 22.7-69.0 | 1                                     | 4.6  | 1.0-19.5  |



Supplementary Table 3: Perpetrator of harm by harm type (continued from the previous page), weighted data

| Harm type                                                                                                                                               |     | Someone else you know |      |           | Another family member you lived with |      |           | Someone else you lived with |       |            | Someone you were in a relationship with (e.g. wife/husband, partner) who you did not live with |      |           | A work colleague |       |           |
|---------------------------------------------------------------------------------------------------------------------------------------------------------|-----|-----------------------|------|-----------|--------------------------------------|------|-----------|-----------------------------|-------|------------|------------------------------------------------------------------------------------------------|------|-----------|------------------|-------|-----------|
|                                                                                                                                                         |     | n                     | %    | 95% CI    | n                                    | %    | 95% CI    | n                           | %     | 95% CI     | n                                                                                              | %    | 95% CI    | n                | %     | 95% CI    |
| Been kept awake due to noise or disruption                                                                                                              | No  | 296                   | 80.1 | 75.0-84.3 | 348                                  | 94.1 | 90.8-96.3 | 325                         | 87.7  | 83.7-90.9  | 362                                                                                            | 97.7 | 95.2-98.9 | 365              | 98.5  | 96.3-99.4 |
|                                                                                                                                                         | Yes | 74                    | 20.0 | 15.7-25.1 | 22                                   | 5.9  | 3.7-9.2   | 45                          | 12.3  | 9.1-16.3   | 8                                                                                              | 2.3  | 1.1-4.8   | 6                | 1.5   | 0.6-3.8   |
| Felt uncomfortable or anxious at a social occasion (e.g. a party)                                                                                       | No  | 264                   | 86.7 | 81.8-90.4 | 299                                  | 97.8 | 95.2-99.0 | 294                         | 96.5  | 93.0-98.3  | 297                                                                                            | 97.3 | 94.5-98.7 | 276              | 90.6  | 86.0-93.8 |
|                                                                                                                                                         | Yes | 41                    | 13.4 | 9.6-18.3  | 7                                    | 2.2  | 1.0-4.9   | 11                          | 3.5   | 1.8-7.0    | 8                                                                                              | 2.7  | 1.3-5.5   | 29               | 9.4   | 6.2-14.1  |
| Had a serious argument that did NOT include physical violence                                                                                           | No  | 233                   | 90.0 | 85.0-93.4 | 240                                  | 92.7 | 88.6-95.3 | 244                         | 94.1  | 90.2-96.5  | 240                                                                                            | 92.7 | 89.0-95.2 | 249              | 96.2  | 92.5-98.1 |
|                                                                                                                                                         | Yes | 26                    | 10.0 | 6.6-15.0  | 19                                   | 7.3  | 4.7-11.4  | 15                          | 5.9   | 3.5-9.9    | 19                                                                                             | 7.3  | 4.8-11.0  | 10               | 3.8   | 1.9-7.5   |
| Been let down by someone due to them failing to do something that I was counting on them to do because of their drinking                                | No  | 156                   | 93.0 | 86.7-96.5 | 156                                  | 92.8 | 87.8-95.8 | 157                         | 93.7  | 87.6-96.9  | 160                                                                                            | 95.2 | 90.7-97.6 | 150              | 89.4  | 82.1-94.0 |
|                                                                                                                                                         | Yes | 12                    | 7.0  | 3.5-13.3  | 12                                   | 7.2  | 4.2-12.2  | 11                          | 6.4   | 3.1-12.4   | 8                                                                                              | 4.8  | 2.4-9.4   | 18               | 10.6  | 6.1-17.9  |
| Been emotionally hurt or neglected                                                                                                                      | No  | 152                   | 95.7 | 91.1-97.9 | 146                                  | 92.0 | 86.4-95.4 | 147                         | 92.5  | 85.9-96.1  | 137                                                                                            | 85.9 | 78.7-91.0 | 154              | 97.0  | 91.9-98.9 |
|                                                                                                                                                         | Yes | 7                     | 4.3  | 2.1-8.9   | 13                                   | 8.0  | 4.6-13.6  | 12                          | 7.6   | 3.9-14.1   | 22                                                                                             | 14.1 | 9.1-21.3  | 5                | 3.0   | 1.1-8.1   |
| Felt physically threatened                                                                                                                              | No  | 132                   | 85.7 | 78.0-91.1 | 148                                  | 96.7 | 92.0-98.6 | 153                         | 99.6  | 97.4-100.0 | 149                                                                                            | 97.0 | 92.4-98.8 | 151              | 98.2  | 93.0-99.6 |
|                                                                                                                                                         | Yes | 22                    | 14.3 | 8.9-22.0  | 5                                    | 3.3  | 1.4-8.0   | 1                           | 0.4   | 0.1-2.6    | 5                                                                                              | 3.0  | 1.2-7.6   | 3                | 1.8   | 0.4-7.0   |
| Had to stop seeing or being in contact with someone because of their drinking                                                                           | No  | 102                   | 89.5 | 82.3-94.0 | 106                                  | 92.7 | 85.9-96.3 | 109                         | 95.8  | 86.4-98.8  | 107                                                                                            | 93.9 | 87.2-97.2 | 108              | 95.0  | 87.1-98.1 |
|                                                                                                                                                         | Yes | 12                    | 10.5 | 6.0-17.7  | 8                                    | 7.3  | 3.7-14.1  | 5                           | 4.2   | 1.2-13.6   | 7                                                                                              | 6.1  | 2.8-12.8  | 6                | 5.0   | 1.9-12.9  |
| Had to contact the police                                                                                                                               | No  | 87                    | 81.5 | 71.2-88.7 | 101                                  | 94.8 | 88.4-97.8 | 105                         | 98.4  | 93.2-99.6  | 105                                                                                            | 97.8 | 93.1-99.3 | 106              | 98.7  | 91.3-99.8 |
|                                                                                                                                                         | Yes | 20                    | 18.5 | 11.3-28.8 | 6                                    | 5.2  | 2.2-11.6  | 2                           | 1.6   | 0.4-6.8    | 2                                                                                              | 2.2  | 0.7-6.9   | 1                | 1.3   | 0.2-8.7   |
| Had someone break or damage something that mattered to me                                                                                               | No  | 81                    | 89.9 | 80.6-95.0 | 80                                   | 88.2 | 78.4-93.9 | 87                          | 95.7  | 88.5-98.5  | 87                                                                                             | 96.0 | 88.6-98.6 | 89               | 97.8  | 90.6-99.5 |
|                                                                                                                                                         | Yes | 9                     | 10.1 | 5.0-19.4  | 11                                   | 11.8 | 6.1-21.6  | 4                           | 4.3   | 1.5-11.5   | 4                                                                                              | 4.0  | 1.4-11.4  | 2                | 2.2   | 0.5-9.4   |
| Been physically hurt due to them assaulting me or acting violently                                                                                      | No  | 74                    | 89.3 | 79.5-94.7 | 76                                   | 90.8 | 80.5-95.9 | 82                          | 97.9  | 93.2-99.4  | 79                                                                                             | 95.0 | 86.3-98.3 | 79               | 94.4  | 79.9-98.6 |
|                                                                                                                                                         | Yes | 9                     | 10.7 | 5.3-20.5  | 8                                    | 9.2  | 4.1-19.6  | 2                           | 2.1   | 0.6-6.8    | 4                                                                                              | 5.0  | 1.7-13.7  | 5                | 5.6   | 1.4-20.1  |
| Been put at risk in a car when someone was driving after drinking                                                                                       | No  | 59                    | 85.3 | 74.7-91.9 | 63                                   | 90.4 | 79.6-95.8 | 69                          | 99.1  | 93.7-99.9  | 65                                                                                             | 93.6 | 83.4-97.7 | 66               | 95.0  | 84.4-98.5 |
|                                                                                                                                                         | Yes | 10                    | 14.7 | 8.1-25.3  | 7                                    | 9.6  | 4.2-20.4  | 1                           | 0.9   | 0.1-6.3    | 4                                                                                              | 6.4  | 2.3-16.6  | 3                | 5.0   | 1.5-15.6  |
| Felt genuinely concerned that they may cause harm to my children or someone else's children                                                             | No  | 36                    | 70.7 | 54.6-82.9 | 48                                   | 94.1 | 82.4-98.2 | 50                          | 98.6  | 90.0-99.8  | 49                                                                                             | 96.9 | 87.6-99.3 | 49               | 95.8  | 74.8-99.4 |
|                                                                                                                                                         | Yes | 15                    | 29.3 | 17.1-45.4 | 3                                    | 5.9  | 1.8-17.6  | 1                           | 1.4   | 0.2-10.0   | 2                                                                                              | 3.1  | 0.7-12.4  | 2                | 4.2   | 0.6-25.2  |
| Had to spend my personal time caring for a person with a long term health condition or disability that resulted from their current or previous drinking | No  | 49                    | 91.2 | 78.1-96.8 | 49                                   | 91.0 | 79.4-96.4 | 53                          | 97.9  | 91.0-99.5  | 52                                                                                             | 96.4 | 86.2-99.2 | 53               | 97.8  | 84.9-99.7 |
|                                                                                                                                                         | Yes | 5                     | 8.8  | 3.2-21.9  | 5                                    | 9.0  | 3.6-20.6  | 1                           | 2.2   | 0.5-9.0    | 2                                                                                              | 3.6  | 0.8-13.8  | 1                | 2.2   | 0.3-15.1  |
| Been physically hurt due to them accidentally injuring me (e.g. by falling on me)                                                                       | No  | 49                    | 96.8 | 90.0-99.0 | 51                                   | 99.2 | 94.4-99.9 | 46                          | 89.5  | 73.4-96.3  | 47                                                                                             | 91.5 | 79.3-96.8 | 49               | 97.0  | 86.4-99.4 |
|                                                                                                                                                         | Yes | 2                     | 3.2  | 1.0-10.0  | 0                                    | 0.8  | 0.1-5.6   | 5                           | 10.6  | 3.7-26.6   | 4                                                                                              | 8.5  | 3.2-20.7  | 2                | 3.0   | 0.6-13.6  |
| Had money that would have improved the quality of my life spent on their alcohol-related purchases                                                      | No  | 43                    | 95.6 | 86.2-98.7 | 40                                   | 87.5 | 73.4-94.6 | 40                          | 88.9  | 72.6-96.0  | 44                                                                                             | 95.9 | 83.2-99.1 | 45               | 98.1  | 87.0-99.8 |
|                                                                                                                                                         | Yes | 2                     | 4.4  | 1.3-13.8  | 6                                    | 12.5 | 5.4-26.6  | 5                           | 11.1  | 4.0-27.4   | 2                                                                                              | 4.1  | 0.9-16.8  | 1                | 1.9   | 0.2-13.0  |
| Drank alcohol myself in order to cope with the problems caused by their drinking                                                                        | No  | 26                    | 90.3 | 75.9-96.5 | 27                                   | 93.8 | 76.5-98.6 | 27                          | 92.2  | 73.8-98.0  | 25                                                                                             | 87.3 | 66.8-95.9 | 28               | 95.7  | 81.5-99.1 |
|                                                                                                                                                         | Yes | 3                     | 9.7  | 3.5-24.1  | 2                                    | 6.2  | 1.4-23.5  | 2                           | 7.9   | 2.0-26.2   | 4                                                                                              | 12.7 | 4.1-33.2  | 1                | 4.3   | 0.9-18.5  |
| Felt forced or pressured into sex or something sexual                                                                                                   | No  | 23                    | 85.5 | 65.7-94.8 | 26                                   | 95.4 | 70.5-99.4 | 24                          | 86.3  | 62.9-95.9  | 23                                                                                             | 83.4 | 61.0-94.2 | 27               | 100.0 | -         |
|                                                                                                                                                         | Yes | 4                     | 14.5 | 5.2-34.3  | 1                                    | 4.7  | 0.6-29.5  | 4                           | 13.7  | 4.1-37.1   | 5                                                                                              | 16.6 | 5.8-39.0  | 0                | 0.0   | -         |
| Had to move out of my usual place of residence and stay somewhere else                                                                                  | No  | 20                    | 94.0 | 63.8-99.3 | 13                                   | 59.9 | 34.8-80.7 | 21                          | 100.0 | -          | 21                                                                                             | 97.4 | 81.0-99.7 | 21               | 100.0 | -         |
|                                                                                                                                                         | Yes | 1                     | 6.0  | 0.7-36.2  | 9                                    | 40.1 | 19.3-65.2 | 0                           | 0.0   | -          | 1                                                                                              | 2.6  | 0.3-19.0  | 0                | 0.0   | -         |

Supplementary Table 4: Frequency of harm by harm type (as a percentage of those who experienced each harm), weighted data

|                                                                                                                                                         | Frequency                                      | Percentage | 95% CI     |
|---------------------------------------------------------------------------------------------------------------------------------------------------------|------------------------------------------------|------------|------------|
| Been kept awake due to noise or disruption                                                                                                              | Daily or almost daily (i.e. 4-7 days per week) | 2.4        | 1.3- 4.3   |
|                                                                                                                                                         | Weekly (i.e. 1-3 times per week)               | 12.1       | 9.0-16.1   |
|                                                                                                                                                         | Monthly (i.e. 2-3 times per month)             | 18.4       | 14.5-23.2  |
|                                                                                                                                                         | Less than once a month                         | 67.1       | 61.7- 72.2 |
| Felt uncomfortable or anxious at a social occasion (e.g. a party)                                                                                       | Daily or almost daily (i.e. 4-7 days per week) | 1.5        | 0.6-3.9    |
|                                                                                                                                                         | Weekly (i.e. 1-3 times per week)               | 1.0        | 0.4-2.6    |
|                                                                                                                                                         | Monthly (i.e. 2-3 times per month)             | 8.0        | 5.3-12.0   |
|                                                                                                                                                         | Less than once a month                         | 89.5       | 85.2-92.6  |
| Had a serious argument that did NOT include physical violence                                                                                           | Daily or almost daily (i.e. 4-7 days per week) | 1.4        | 0.4-4.4    |
|                                                                                                                                                         | Weekly (i.e. 1-3 times per week)               | 4.8        | 2.7-8.6    |
|                                                                                                                                                         | Monthly (i.e. 2-3 times per month)             | 7.0        | 4.3-11.3   |
|                                                                                                                                                         | Less than once a month                         | 86.7       | 81.5-90.6  |
| Been let down by someone due to them failing to do something that I was counting on them to do because of their drinking                                | Daily or almost daily (i.e. 4-7 days per week) | 3.9        | 1.7-8.6    |
|                                                                                                                                                         | Weekly (i.e. 1-3 times per week)               | 9.6        | 5.5-16.4   |
|                                                                                                                                                         | Monthly (i.e. 2-3 times per month)             | 13.6       | 8.9-20.3   |
|                                                                                                                                                         | Less than once a month                         | 72.9       | 64.6-79.8  |
| Been emotionally hurt or neglected                                                                                                                      | Daily or almost daily (i.e. 4-7 days per week) | 9.0        | 5.0-15.5   |
|                                                                                                                                                         | Weekly (i.e. 1-3 times per week)               | 7.6        | 4.1-13.4   |
|                                                                                                                                                         | Monthly (i.e. 2-3 times per month)             | 15.1       | 10.0-22.3  |
|                                                                                                                                                         | Less than once a month                         | 68.3       | 59.6-75.9  |
| Felt physically threatened                                                                                                                              | Daily or almost daily (i.e. 4-7 days per week) | 4.6        | 2.1-9.9    |
|                                                                                                                                                         | Weekly (i.e. 1-3 times per week)               | 4.4        | 2.0-9.7    |
|                                                                                                                                                         | Monthly (i.e. 2-3 times per month)             | 7.6        | 3.8-14.8   |
|                                                                                                                                                         | Less than once a month                         | 83.3       | 75.2-89.2  |
| Had to stop seeing or being in contact with someone because of their drinking                                                                           | Daily or almost daily (i.e. 4-7 days per week) | 19.3       | 11.9-29.6  |
|                                                                                                                                                         | Weekly (i.e. 1-3 times per week)               | 10.4       | 5.5-18.7   |
|                                                                                                                                                         | Monthly (i.e. 2-3 times per month)             | 9.4        | 5.2-16.5   |
|                                                                                                                                                         | Less than once a month                         | 61.0       | 50.1-70.8  |
| Had to contact the police                                                                                                                               | Daily or almost daily (i.e. 4-7 days per week) | 7.8        | 3.6-16.2   |
|                                                                                                                                                         | Weekly (i.e. 1-3 times per week)               | 6.5        | 2.6-15.5   |
|                                                                                                                                                         | Monthly (i.e. 2-3 times per month)             | 7.5        | 3.8-14.1   |
|                                                                                                                                                         | Less than once a month                         | 78.2       | 67.9-85.9  |
| Had someone break or damage something that mattered to me                                                                                               | Daily or almost daily (i.e. 4-7 days per week) | 3.2        | 0.9-10.7   |
|                                                                                                                                                         | Weekly (i.e. 1-3 times per week)               | 5.0        | 1.9-12.5   |
|                                                                                                                                                         | Monthly (i.e. 2-3 times per month)             | 7.4        | 3.6-14.5   |
|                                                                                                                                                         | Less than once a month                         | 84.4       | 74.9-90.8  |
| Been physically hurt due to them assaulting me or acting violently                                                                                      | Daily or almost daily (i.e. 4-7 days per week) | 7.1        | 2.6-18.2   |
|                                                                                                                                                         | Weekly (i.e. 1-3 times per week)               | 6.3        | 2.0-17.7   |
|                                                                                                                                                         | Monthly (i.e. 2-3 times per month)             | 11.0       | 5.5-20.8   |
|                                                                                                                                                         | Less than once a month                         | 75.6       | 62.8-85.0  |
| Been put at risk in a car when someone was driving after drinking                                                                                       | Daily or almost daily (i.e. 4-7 days per week) | 8.6        | 3.4-19.9   |
|                                                                                                                                                         | Weekly (i.e. 1-3 times per week)               | 3.2        | 0.7-13.0   |
|                                                                                                                                                         | Monthly (i.e. 2-3 times per month)             | 8.5        | 3.3-20.1   |
|                                                                                                                                                         | Less than once a month                         | 79.7       | 66.6-88.6  |
| Felt genuinely concerned that they may cause harm to my children or someone else's children                                                             | Daily or almost daily (i.e. 4-7 days per week) | 6.1        | 1.8-18.1   |
|                                                                                                                                                         | Weekly (i.e. 1-3 times per week)               | 7.1        | 2.4-19.2   |
|                                                                                                                                                         | Monthly (i.e. 2-3 times per month)             | 24.5       | 12.9-41.4  |
|                                                                                                                                                         | Less than once a month                         | 62.3       | 45.7-76.5  |
| Had to spend my personal time caring for a person with a long term health condition or disability that resulted from their current or previous drinking | Daily or almost daily (i.e. 4-7 days per week) | 19.4       | 10.2-33.8  |
|                                                                                                                                                         | Weekly (i.e. 1-3 times per week)               | 15.6       | 7.5-29.7   |
|                                                                                                                                                         | Monthly (i.e. 2-3 times per month)             | 28.0       | 16.5-43.6  |
|                                                                                                                                                         | Less than once a month                         | 37.0       | 23.8-52.4  |
| Been physically hurt due to them accidentally injuring me (e.g. by falling on me)                                                                       | Daily or almost daily (i.e. 4-7 days per week) | 3.9        | 0.9-15.7   |
|                                                                                                                                                         | Weekly (i.e. 1-3 times per week)               | 8.1        | 2.8-21.3   |
|                                                                                                                                                         | Monthly (i.e. 2-3 times per month)             | 11.7       | 5.0-24.7   |
|                                                                                                                                                         | Less than once a month                         | 76.3       | 61.2-86.8  |
| Had money that would have improved the quality of my life spent on their alcohol-related purchases                                                      | Daily or almost daily (i.e. 4-7 days per week) | 6.3        | 1.9-19.1   |
|                                                                                                                                                         | Weekly (i.e. 1-3 times per week)               | 7.6        | 2.1-24.0   |
|                                                                                                                                                         | Monthly (i.e. 2-3 times per month)             | 35.8       | 21.3-53.4  |
|                                                                                                                                                         | Less than once a month                         | 50.3       | 33.7-66.7  |
| Drank alcohol myself in order to cope with the problems caused by                                                                                       | Daily or almost daily (i.e. 4-7 days per week) | 5.2        | 1.0-22.4   |

|                                                                                                                                                                                                                                                                                                                                                             | Frequency                                      | Percentage                       | 95% CI           |
|-------------------------------------------------------------------------------------------------------------------------------------------------------------------------------------------------------------------------------------------------------------------------------------------------------------------------------------------------------------|------------------------------------------------|----------------------------------|------------------|
| 1<br>2<br>3<br>4<br>5<br>6<br>7<br>8<br>9<br>10<br>11<br>12<br>13<br>14<br>15<br>16<br>17<br>18<br>19<br>20<br>21<br>22<br>23<br>24<br>25<br>26<br>27<br>28<br>29<br>30<br>31<br>32<br>33<br>34<br>35<br>36<br>37<br>38<br>39<br>40<br>41<br>42<br>43<br>44<br>45<br>46<br>47<br>48<br>49<br>50<br>51<br>52<br>53<br>54<br>55<br>56<br>57<br>58<br>59<br>60 | their drinking                                 | Weekly (i.e. 1-3 times per week) | 20.7<br>8.1-43.5 |
|                                                                                                                                                                                                                                                                                                                                                             | Monthly (i.e. 2-3 times per month)             | 42.5<br>23.0-64.8                |                  |
|                                                                                                                                                                                                                                                                                                                                                             | Less than once a month                         | 31.6<br>14.9-54.9                |                  |
| Felt forced or pressured into sex or something sexual                                                                                                                                                                                                                                                                                                       | Daily or almost daily (i.e. 4-7 days per week) | 2.4<br>0.3-17.6                  |                  |
|                                                                                                                                                                                                                                                                                                                                                             | Weekly (i.e. 1-3 times per week)               | 4.5<br>0.5-28.7                  |                  |
|                                                                                                                                                                                                                                                                                                                                                             | Monthly (i.e. 2-3 times per month)             | 2.1<br>0.3-15.5                  |                  |
| Had to move out of my usual place of residence and stay somewhere else                                                                                                                                                                                                                                                                                      | Less than once a month                         | 91.0<br>72.0-97.5                |                  |
|                                                                                                                                                                                                                                                                                                                                                             | Daily or almost daily (i.e. 4-7 days per week) | 8.1<br>1.6-31.8                  |                  |
|                                                                                                                                                                                                                                                                                                                                                             | Weekly (i.e. 1-3 times per week)               | 12.0<br>2.5-42.1                 |                  |
|                                                                                                                                                                                                                                                                                                                                                             | Monthly (i.e. 2-3 times per month)             | 6.1<br>1.3-24.8                  |                  |
|                                                                                                                                                                                                                                                                                                                                                             | Less than once a month                         | 73.8<br>47.4-89.8                |                  |

For peer review only

**STROBE 2007 (v4) Statement—Checklist of items that should be included in reports of *cross-sectional studies***

| Section/Topic                | Item # | Recommendation                                                                                                                                                                       | Reported on page #             |
|------------------------------|--------|--------------------------------------------------------------------------------------------------------------------------------------------------------------------------------------|--------------------------------|
| Title and abstract           | 1      | (a) Indicate the study's design with a commonly used term in the title or the abstract                                                                                               | 1                              |
|                              |        | (b) Provide in the abstract an informative and balanced summary of what was done and what was found                                                                                  | 2                              |
| <b>Introduction</b>          |        |                                                                                                                                                                                      |                                |
| Background/rationale         | 2      | Explain the scientific background and rationale for the investigation being reported                                                                                                 | 3                              |
| Objectives                   | 3      | State specific objectives, including any prespecified hypotheses                                                                                                                     | 3                              |
| <b>Methods</b>               |        |                                                                                                                                                                                      |                                |
| Study design                 | 4      | Present key elements of study design early in the paper                                                                                                                              | 3                              |
| Setting                      | 5      | Describe the setting, locations, and relevant dates, including periods of recruitment, exposure, follow-up, and data collection                                                      | 3                              |
| Participants                 | 6      | (a) Give the eligibility criteria, and the sources and methods of selection of participants                                                                                          | 3                              |
| Variables                    | 7      | Clearly define all outcomes, exposures, predictors, potential confounders, and effect modifiers. Give diagnostic criteria, if applicable                                             | 4                              |
| Data sources/<br>measurement | 8*     | For each variable of interest, give sources of data and details of methods of assessment (measurement). Describe comparability of assessment methods if there is more than one group | 3-4                            |
| Bias                         | 9      | Describe any efforts to address potential sources of bias                                                                                                                            | 3 (sampling) and 5 (weighting) |
| Study size                   | 10     | Explain how the study size was arrived at                                                                                                                                            | 3-4                            |
| Quantitative variables       | 11     | Explain how quantitative variables were handled in the analyses. If applicable, describe which groupings were chosen and why                                                         | 5                              |
| Statistical methods          | 12     | (a) Describe all statistical methods, including those used to control for confounding                                                                                                | 5                              |
|                              |        | (b) Describe any methods used to examine subgroups and interactions                                                                                                                  | 5                              |
|                              |        | (c) Explain how missing data were addressed                                                                                                                                          | 5                              |
|                              |        | (d) If applicable, describe analytical methods taking account of sampling strategy                                                                                                   | 5                              |
|                              |        | (e) Describe any sensitivity analyses                                                                                                                                                | NA                             |

|                          |     |                                                                                                                                                                                                              |                                                                            |
|--------------------------|-----|--------------------------------------------------------------------------------------------------------------------------------------------------------------------------------------------------------------|----------------------------------------------------------------------------|
| <b>Results</b>           |     |                                                                                                                                                                                                              |                                                                            |
| Participants             | 13* | (a) Report numbers of individuals at each stage of study—eg numbers potentially eligible, examined for eligibility, confirmed eligible, included in the study, completing follow-up, and analysed            | 5                                                                          |
|                          |     | (b) Give reasons for non-participation at each stage                                                                                                                                                         | NA                                                                         |
|                          |     | (c) Consider use of a flow diagram                                                                                                                                                                           | NA                                                                         |
| Descriptive data         | 14* | (a) Give characteristics of study participants (eg demographic, clinical, social) and information on exposures and potential confounders                                                                     | 8 and 10                                                                   |
|                          |     | (b) Indicate number of participants with missing data for each variable of interest                                                                                                                          | Not included due to space. We can add this as another supplementary table. |
| Outcome data             | 15* | Report numbers of outcome events or summary measures                                                                                                                                                         | 8 and 10                                                                   |
| Main results             | 16  | (a) Give unadjusted estimates and, if applicable, confounder-adjusted estimates and their precision (eg, 95% confidence interval). Make clear which confounders were adjusted for and why they were included | 5-11                                                                       |
|                          |     | (b) Report category boundaries when continuous variables were categorized                                                                                                                                    | NA                                                                         |
|                          |     | (c) If relevant, consider translating estimates of relative risk into absolute risk for a meaningful time period                                                                                             | NA                                                                         |
| Other analyses           | 17  | Report other analyses done—eg analyses of subgroups and interactions, and sensitivity analyses                                                                                                               | NA                                                                         |
| <b>Discussion</b>        |     |                                                                                                                                                                                                              |                                                                            |
| Key results              | 18  | Summarise key results with reference to study objectives                                                                                                                                                     | 12                                                                         |
| Limitations              | 19  | Discuss limitations of the study, taking into account sources of potential bias or imprecision. Discuss both direction and magnitude of any potential bias                                                   | 12                                                                         |
| Interpretation           | 20  | Give a cautious overall interpretation of results considering objectives, limitations, multiplicity of analyses, results from similar studies, and other relevant evidence                                   | 12-14                                                                      |
| Generalisability         | 21  | Discuss the generalisability (external validity) of the study results                                                                                                                                        | 12                                                                         |
| <b>Other information</b> |     |                                                                                                                                                                                                              |                                                                            |
| Funding                  | 22  | Give the source of funding and the role of the funders for the present study and, if applicable, for the original study on which the present article is based                                                | 5                                                                          |

\*Give information separately for cases and controls in case-control studies and, if applicable, for exposed and unexposed groups in cohort and cross-sectional studies.

1  
2  
3  
4 **Note:** An Explanation and Elaboration article discusses each checklist item and gives methodological background and published examples of transparent reporting. The STROBE  
5 checklist is best used in conjunction with this article (freely available on the Web sites of PLoS Medicine at <http://www.plosmedicine.org/>, Annals of Internal Medicine at  
6 <http://www.annals.org/>, and Epidemiology at <http://www.epidem.com/>). Information on the STROBE Initiative is available at [www.strobe-statement.org](http://www.strobe-statement.org).  
7  
8  
9  
10  
11  
12  
13  
14  
15  
16  
17  
18  
19  
20  
21  
22  
23  
24  
25  
26  
27  
28  
29  
30  
31  
32  
33  
34  
35  
36  
37  
38  
39  
40  
41  
42  
43  
44  
45  
46  
47

For peer review only
