# Supplementary material for: Alcohol-related harm to others in England: a cross-sectional analysis of national survey data
Source: PubMed Central journal article supplement — BMJ Open. 2019 May 9;9(5):e021046. doi: 10.1136/bmjopen-2017-021046 (PMC6528046; doi:10.1136/bmjopen-2017-021046), 2019-05-09
Supplement: bmjopen-2017-021046supp001.pdf [file bmjopen-2017-021046supp001.pdf]

Supplementary Table 1: Examination of missing data, non-weighted data

| Independent variable                        | Included (AHTO questions answered) |      | Excluded (AHTO questions not answered) |     | p value |
|---------------------------------------------|------------------------------------|------|----------------------------------------|-----|---------|
|                                             | N                                  | %    | N                                      | %   |         |
| <i>Sex (N = 5,068)</i>                      |                                    |      |                                        |     |         |
| Female                                      | 2,397                              | 96.9 | 76                                     | 3.1 | 0.023   |
| Male                                        | 2,484                              | 95.7 | 111                                    | 4.3 |         |
| <i>Age band (N = 5,608)</i>                 |                                    |      |                                        |     |         |
| 16-24                                       | 789                                | 97.4 | 21                                     | 2.6 | 0.111   |
| 25-44                                       | 1,460                              | 96.3 | 56                                     | 3.7 |         |
| 45-64                                       | 1,435                              | 95.5 | 68                                     | 4.5 |         |
| 65+                                         | 1,197                              | 96.6 | 42                                     | 3.4 |         |
| <i>Broad ethnic group (N = 5,040)</i>       |                                    |      |                                        |     |         |
| White British                               | 3,603                              | 96.2 | 142                                    | 3.8 | 0.125   |
| Other White groups                          | 393                                | 98.3 | 7                                      | 1.8 |         |
| Black groups                                | 262                                | 95.6 | 12                                     | 4.4 |         |
| Asian groups                                | 539                                | 97.3 | 15                                     | 2.7 |         |
| Other groups                                | 63                                 | 94.0 | 4                                      | 6.0 |         |
| <i>Life stage (N = 5,067)</i>               |                                    |      |                                        |     |         |
| Single                                      | 716                                | 97.4 | 19                                     | 2.6 | 0.150   |
| Pre-family                                  | 260                                | 95.9 | 11                                     | 4.1 |         |
| Family                                      | 1,473                              | 96.7 | 50                                     | 3.3 |         |
| Post family                                 | 2,431                              | 95.8 | 107                                    | 4.2 |         |
| <i>Education (5,039)</i>                    |                                    |      |                                        |     |         |
| No qualifications                           | 866                                | 97.2 | 25                                     | 2.8 | 0.075   |
| GCSE/O-level/CSE                            | 952                                | 95.9 | 41                                     | 4.1 |         |
| A-level/vocational                          | 1,334                              | 97.2 | 39                                     | 2.8 |         |
| Degree/higher degree                        | 1,335                              | 95.4 | 64                                     | 4.6 |         |
| Other/still studying                        | 368                                | 96.1 | 15                                     | 3.9 |         |
| <i>Social grade<sup>†</sup> (N = 5,068)</i> |                                    |      |                                        |     |         |
| AB                                          | 1,081                              | 96.2 | 43                                     | 3.8 | 0.134   |
| C1                                          | 1,554                              | 95.8 | 68                                     | 4.2 |         |
| C2                                          | 947                                | 96.7 | 32                                     | 3.3 |         |
| D                                           | 757                                | 97.7 | 18                                     | 2.3 |         |
| E                                           | 542                                | 95.4 | 26                                     | 4.6 |         |
| <i>Tenure (N = 5,027)</i>                   |                                    |      |                                        |     |         |
| Owned outright                              | 1,729                              | 97.5 | 45                                     | 2.5 | <0.001  |
| Bought on a mortgage                        | 1,124                              | 95.4 | 54                                     | 4.6 |         |
| Rented from local authority                 | 568                                | 95.5 | 27                                     | 4.5 |         |
| Rented from private landlord                | 1,029                              | 97.0 | 32                                     | 3.0 |         |
| Other                                       | 392                                | 93.6 | 27                                     | 6.4 |         |
| <i>Disability (N = 4,956)</i>               |                                    |      |                                        |     |         |
| Considers self disabled                     | 571                                | 94.4 | 34                                     | 5.6 | 0.002   |
| Not disabled                                | 4,213                              | 96.8 | 138                                    | 3.2 |         |
| <i>Employment status (N = 5,066)</i>        |                                    |      |                                        |     |         |
| Employed                                    | 2,306                              | 95.9 | 98                                     | 4.1 | 0.121   |
| Unemployed                                  | 237                                | 98.8 | 3                                      | 1.3 |         |
| Economically inactive                       | 1,009                              | 96.1 | 41                                     | 3.9 |         |
| Retired                                     | 1,327                              | 96.7 | 45                                     | 3.3 |         |
| <i>AUDIT(N = 5,044)</i>                     |                                    |      |                                        |     |         |
| Not hazardous/harmful drinking              | 4,215                              | 96.7 | 142                                    | 3.3 | 0.003   |
| Hazardous/harmful drinking                  | 649                                | 94.5 | 38                                     | 5.5 |         |

N = 5,068 (totals for independent variables will not equal 5,068 where the person did not provide responses to the AHTO questions and the independent variable.

<sup>†</sup>AB is higher managerial, administrative and professional and Intermediate managerial, administrative and professional; C1 is supervisory, clerical and junior managerial, administrative and professional; C2 is skilled manual workers; D is semi-skilled and unskilled manual workers; and E is state pensioners, casual and lowest grade workers, unemployed with state benefits only.

Supplementary Table 2: Prevalence of harm in the previous 12 months by sex, weighted data

| Harm type                                                                                                                                               | Number of respondents who experienced harm |       | Percentage of respondents who experienced harm |                |
|---------------------------------------------------------------------------------------------------------------------------------------------------------|--------------------------------------------|-------|------------------------------------------------|----------------|
|                                                                                                                                                         | Men                                        | Women | Men (95% CI)                                   | Women (95% CI) |
| Been kept awake due to noise or disruption                                                                                                              | 177                                        | 213   | 7.5 (6.3-8.8)                                  | 8.5 (7.4-9.8)  |
| Felt uncomfortable or anxious at a social occasion (e.g. a party)                                                                                       | 160                                        | 171   | 6.8 (5.7-8.0)                                  | 6.8 (5.8-8.0)  |
| Had a serious argument that did NOT include physical violence                                                                                           | 129                                        | 147   | 5.4 (4.6-6.6)                                  | 5.8 (4.9-6.9)  |
| Been let down by someone due to them failing to do something that I was counting on them to do because of their drinking                                | 82                                         | 92    | 3.5 (2.7-4.4)                                  | 3.7 (3.0-4.6)  |
| Been emotionally hurt or neglected                                                                                                                      | 50                                         | 120   | 2.1 (1.6-2.9)                                  | 4.8 (3.9-5.8)  |
| Felt physically threatened                                                                                                                              | 95                                         | 69    | 4.0 (3.2-5.1)                                  | 2.7 (2.1-3.6)  |
| Had to stop seeing or being in contact with someone because of their drinking                                                                           | 47                                         | 73    | 2.0 (1.4-2.7)                                  | 2.9 (2.3-3.7)  |
| Had to contact the police                                                                                                                               | 56                                         | 62    | 2.4 (1.8-3.2)                                  | 2.5 (1.9-3.2)  |
| Had someone break or damage something that mattered to me                                                                                               | 52                                         | 43    | 2.2 (1.6-3.0)                                  | 1.7 (1.2-2.4)  |
| Been physically hurt due to them assaulting me or acting violently                                                                                      | 50                                         | 42    | 2.1 (1.5-2.9)                                  | 1.7 (1.2-2.3)  |
| Been put at risk in a car when someone was driving after drinking                                                                                       | 37                                         | 38    | 1.6 (1.1-2.3)                                  | 1.5 (1.1-2.1)  |
| Felt genuinely concerned that they may cause harm to my children or someone else's children                                                             | 18                                         | 43    | 0.7 (0.4-1.3)                                  | 1.7 (1.3-2.4)  |
| Had to spend my personal time caring for a person with a long term health condition or disability that resulted from their current or previous drinking | 24                                         | 33    | 1.0 (0.7-1.6)                                  | 1.3 (0.9-1.9)  |
| Been physically hurt due to them accidentally injuring me (e.g. by falling on me)                                                                       | 16                                         | 37    | 0.7 (0.4-1.2)                                  | 1.5 (1.0-2.1)  |
| Had money that would have improved the quality of my life spent on their alcohol-related purchases                                                      | 18                                         | 32    | 0.8 (0.5-1.2)                                  | 1.3 (0.9-1.9)  |
| Drank alcohol myself in order to cope with the problems caused by their drinking                                                                        | 19                                         | 14    | 0.8 (0.5-1.3)                                  | 0.5 (0.3-1.0)  |
| Felt forced or pressured into sex or something sexual                                                                                                   | 12                                         | 20    | 0.5 (0.3-0.9)                                  | 0.8 (0.5-1.3)  |
| Had to move out of my usual place of residence and stay somewhere else                                                                                  | 9                                          | 16    | 0.4 (0.2-0.8)                                  | 0.6 (0.4-1.1)  |

Weighted N = 4,874.

Supplementary Table 3: Perpetrator of harm by harm type (continued on the next page), weighted data

| Harm type                                                                                                                                               |     | A friend |      |           | A stranger |      |           | Someone you were in a relationship with (e.g. wife/husband, partner) who you lived with |      |           | A family member you did not live with |      |           |
|---------------------------------------------------------------------------------------------------------------------------------------------------------|-----|----------|------|-----------|------------|------|-----------|-----------------------------------------------------------------------------------------|------|-----------|---------------------------------------|------|-----------|
|                                                                                                                                                         |     | n        | %    | 95% CI    | n          | %    | 95% CI    | n                                                                                       | %    | 95% CI    | n                                     | %    | 95% CI    |
| Been kept awake due to noise or disruption                                                                                                              | No  | 314      | 84.8 | 80.3-88.4 | 187        | 50.5 | 44.7-56.2 | 346                                                                                     | 93.3 | 89.8-95.7 | 359                                   | 97.0 | 94.5-98.4 |
|                                                                                                                                                         | Yes | 56       | 15.2 | 11.6-19.7 | 183        | 49.5 | 43.8-55.3 | 25                                                                                      | 6.7  | 4.3-10.2  | 11                                    | 3.0  | 1.6-5.5   |
| Felt uncomfortable or anxious at a social occasion (e.g. a party)                                                                                       | No  | 205      | 67.2 | 61.0-72.8 | 200        | 65.6 | 59.3-71.5 | 280                                                                                     | 91.7 | 87.4-94.6 | 271                                   | 88.9 | 84.3-92.3 |
|                                                                                                                                                         | Yes | 100      | 32.8 | 27.2-39.0 | 105        | 34.4 | 28.5-40.7 | 25                                                                                      | 8.3  | 5.4-12.6  | 34                                    | 11.1 | 7.7-15.7  |
| Had a serious argument that did NOT include physical violence                                                                                           | No  | 167      | 64.3 | 57.5-70.5 | 225        | 86.8 | 81.4-90.8 | 199                                                                                     | 76.9 | 70.4-82.4 | 216                                   | 83.5 | 77.7-88.0 |
|                                                                                                                                                         | Yes | 93       | 35.7 | 29.5-42.6 | 34         | 13.2 | 9.2-18.6  | 60                                                                                      | 23.1 | 17.6-29.6 | 43                                    | 16.5 | 12.0-22.3 |
| Been let down by someone due to them failing to do something that I was counting on them to do because of their drinking                                | No  | 95       | 56.6 | 48.1-64.7 | 162        | 96.4 | 91.9-98.5 | 136                                                                                     | 81.1 | 73.5-86.9 | 137                                   | 81.4 | 74.1-87.0 |
|                                                                                                                                                         | Yes | 73       | 43.5 | 35.4-51.9 | 6          | 3.6  | 1.5-8.1   | 32                                                                                      | 18.9 | 13.1-26.5 | 31                                    | 18.6 | 13.0-25.9 |
| Been emotionally hurt or neglected                                                                                                                      | No  | 115      | 72.5 | 64.0-79.6 | 150        | 94.3 | 88.7-97.2 | 121                                                                                     | 76.1 | 67.7-82.9 | 116                                   | 72.7 | 64.2-79.8 |
|                                                                                                                                                         | Yes | 44       | 27.6 | 20.5-36.0 | 9          | 5.7  | 2.8-11.3  | 38                                                                                      | 23.9 | 17.1-32.3 | 43                                    | 27.3 | 20.2-35.8 |
| Felt physically threatened                                                                                                                              | No  | 130      | 84.6 | 77.0-90.0 | 61         | 39.5 | 30.9-48.8 | 136                                                                                     | 88.5 | 82.2-92.8 | 145                                   | 94.5 | 89.6-97.2 |
|                                                                                                                                                         | Yes | 24       | 15.4 | 1.0-23.0  | 93         | 60.5 | 51.2-69.1 | 18                                                                                      | 11.5 | 7.2-17.8  | 8                                     | 5.5  | 2.8-10.5  |
| Had to stop seeing or being in contact with someone because of their drinking                                                                           | No  | 71       | 62.4 | 52.3-71.6 | 109        | 95.6 | 88.8-98.4 | 92                                                                                      | 80.6 | 71.2-87.4 | 86                                    | 75.9 | 66.1-83.6 |
|                                                                                                                                                         | Yes | 43       | 37.6 | 28.4-47.7 | 5          | 4.4  | 1.6-11.2  | 22                                                                                      | 19.4 | 12.6-28.8 | 27                                    | 24.1 | 16.4-33.9 |
| Had to contact the police                                                                                                                               | No  | 96       | 89.5 | 81.3-94.3 | 59         | 55.3 | 44.3-65.8 | 93                                                                                      | 87.0 | 79.0-92.2 | 95                                    | 88.8 | 79.1-94.3 |
|                                                                                                                                                         | Yes | 11       | 10.5 | 5.7-18.7  | 48         | 44.7 | 34.2-55.7 | 14                                                                                      | 13.0 | 7.8-21.0  | 12                                    | 11.2 | 5.7-20.9  |
| Had someone break or damage something that mattered to me                                                                                               | No  | 50       | 55.8 | 43.0-67.9 | 82         | 90.9 | 82.1-95.6 | 75                                                                                      | 82.8 | 72.5-89.8 | 82                                    | 90.8 | 82.1-95.5 |
|                                                                                                                                                         | Yes | 40       | 44.2 | 32.1-57.0 | 8          | 9.1  | 4.4-17.9  | 16                                                                                      | 17.2 | 10.2-27.5 | 8                                     | 9.2  | 4.5-17.9  |
| Been physically hurt due to them assaulting me or acting violently                                                                                      | No  | 71       | 85.4 | 74.7-92.0 | 57         | 68.5 | 56.4-78.5 | 66                                                                                      | 79.8 | 69.2-87.4 | 73                                    | 88.1 | 76.8-94.3 |
|                                                                                                                                                         | Yes | 12       | 14.7 | 8.0-25.3  | 26         | 31.5 | 21.5-43.6 | 17                                                                                      | 20.2 | 12.6-30.8 | 10                                    | 11.9 | 5.7-23.2  |
| Been put at risk in a car when someone was driving after drinking                                                                                       | No  | 46       | 66.7 | 54.0-77.4 | 52         | 75.5 | 61.6-85.6 | 62                                                                                      | 89.5 | 78.5-95.2 | 66                                    | 96.1 | 87.9-98.8 |
|                                                                                                                                                         | Yes | 23       | 33.3 | 22.6-46.0 | 17         | 24.5 | 14.4-38.4 | 7                                                                                       | 10.5 | 4.8-21.5  | 3                                     | 4.0  | 1.2-12.1  |
| Felt genuinely concerned that they may cause harm to my children or someone else's children                                                             | No  | 47       | 91.1 | 77.3-96.9 | 39         | 77.1 | 62.5-87.2 | 45                                                                                      | 87.4 | 75.3-94.0 | 41                                    | 80.9 | 65.9-90.2 |
|                                                                                                                                                         | Yes | 5        | 8.9  | 3.1-22.7  | 12         | 22.9 | 12.8-37.5 | 6                                                                                       | 12.6 | 6.0-24.7  | 10                                    | 19.2 | 9.8-34.1  |
| Had to spend my personal time caring for a person with a long term health condition or disability that resulted from their current or previous drinking | No  | 41       | 75.7 | 60.0-86.6 | 51         | 94.6 | 85.4-98.1 | 47                                                                                      | 87.5 | 73.5-94.6 | 34                                    | 62.4 | 47.2-75.5 |
|                                                                                                                                                         | Yes | 13       | 24.3 | 13.4-40.0 | 3          | 5.4  | 1.9-14.6  | 7                                                                                       | 12.5 | 5.4-26.5  | 20                                    | 37.6 | 24.5-52.8 |
| Been physically hurt due to them accidentally injuring me (e.g. by falling on me)                                                                       | No  | 30       | 59.5 | 43.6-73.5 | 32         | 62.5 | 46.3-76.2 | 44                                                                                      | 87.2 | 74.1-94.2 | 44                                    | 86.6 | 72.0-94.2 |
|                                                                                                                                                         | Yes | 21       | 40.5 | 26.5-56.4 | 19         | 37.6 | 23.8-53.7 | 7                                                                                       | 12.8 | 5.8-25.9  | 7                                     | 13.4 | 5.8-28.0  |
| Had money that would have improved the quality of my life spent on their alcohol-related purchases                                                      | No  | 29       | 63.0 | 46.6-76.8 | 44         | 97.1 | 80.6-99.6 | 30                                                                                      | 66.5 | 49.1-80.4 | 40                                    | 89.1 | 72.6-96.2 |
|                                                                                                                                                         | Yes | 17       | 37.0 | 23.2-53.4 | 1          | 3.0  | 0.4-19.4  | 15                                                                                      | 33.5 | 19.6-50.9 | 5                                     | 10.9 | 3.8-27.4  |
| Drank alcohol myself in order to cope with the problems caused by their drinking                                                                        | No  | 22       | 75.7 | 54.3-89.1 | 27         | 93.4 | 70.9-98.8 | 22                                                                                      | 76.9 | 53.4-90.6 | 25                                    | 86.0 | 62.0-95.9 |
|                                                                                                                                                         | Yes | 7        | 24.3 | 10.9-45.7 | 2          | 6.6  | 1.2-29.1  | 7                                                                                       | 23.1 | 9.4-46.6  | 4                                     | 14.0 | 4.1-38.0  |
| Felt forced or pressured into sex or something sexual                                                                                                   | No  | 22       | 80.3 | 58.5-92.2 | 22         | 81.0 | 55.8-93.5 | 21                                                                                      | 76.7 | 54.0-90.2 | 26                                    | 95.8 | 72.8-99.5 |
|                                                                                                                                                         | Yes | 5        | 19.7 | 7.8-41.5  | 5          | 19.0 | 6.5-44.2  | 6                                                                                       | 23.3 | 9.8-46.0  | 1                                     | 4.2  | 0.5-27.2  |
| Had to move out of my usual place of residence and stay somewhere else                                                                                  | No  | 18       | 82.9 | 62.3-93.4 | 20         | 94.1 | 74.7-98.8 | 12                                                                                      | 55.3 | 31.0-77.3 | 20                                    | 95.4 | 80.5-99.0 |
|                                                                                                                                                         | Yes | 4        | 17.1 | 6.6-37.7  | 1          | 5.9  | 1.2-25.3  | 10                                                                                      | 44.7 | 22.7-69.0 | 1                                     | 4.6  | 1.0-19.5  |

Supplementary Table 3: Perpetrator of harm by harm type (continued from the previous page), weighted data

| Harm type                                                                                                                                               |     | Someone else you know |      |           | Another family member you lived with |      |           | Someone else you lived with |       |            | Someone you were in a relationship with (e.g. wife/husband, partner) who you did not live with |      |           | A work colleague |       |           |
|---------------------------------------------------------------------------------------------------------------------------------------------------------|-----|-----------------------|------|-----------|--------------------------------------|------|-----------|-----------------------------|-------|------------|------------------------------------------------------------------------------------------------|------|-----------|------------------|-------|-----------|
|                                                                                                                                                         |     | n                     | %    | 95% CI    | n                                    | %    | 95% CI    | n                           | %     | 95% CI     | n                                                                                              | %    | 95% CI    | n                | %     | 95% CI    |
| Been kept awake due to noise or disruption                                                                                                              | No  | 296                   | 80.1 | 75.0-84.3 | 348                                  | 94.1 | 90.8-96.3 | 325                         | 87.7  | 83.7-90.9  | 362                                                                                            | 97.7 | 95.2-98.9 | 365              | 98.5  | 96.3-99.4 |
|                                                                                                                                                         | Yes | 74                    | 20.0 | 15.7-25.1 | 22                                   | 5.9  | 3.7-9.2   | 45                          | 12.3  | 9.1-16.3   | 8                                                                                              | 2.3  | 1.1-4.8   | 6                | 1.5   | 0.6-3.8   |
| Felt uncomfortable or anxious at a social occasion (e.g. a party)                                                                                       | No  | 264                   | 86.7 | 81.8-90.4 | 299                                  | 97.8 | 95.2-99.0 | 294                         | 96.5  | 93.0-98.3  | 297                                                                                            | 97.3 | 94.5-98.7 | 276              | 90.6  | 86.0-93.8 |
|                                                                                                                                                         | Yes | 41                    | 13.4 | 9.6-18.3  | 7                                    | 2.2  | 1.0-4.9   | 11                          | 3.5   | 1.8-7.0    | 8                                                                                              | 2.7  | 1.3-5.5   | 29               | 9.4   | 6.2-14.1  |
| Had a serious argument that did NOT include physical violence                                                                                           | No  | 233                   | 90.0 | 85.0-93.4 | 240                                  | 92.7 | 88.6-95.3 | 244                         | 94.1  | 90.2-96.5  | 240                                                                                            | 92.7 | 89.0-95.2 | 249              | 96.2  | 92.5-98.1 |
|                                                                                                                                                         | Yes | 26                    | 10.0 | 6.6-15.0  | 19                                   | 7.3  | 4.7-11.4  | 15                          | 5.9   | 3.5-9.9    | 19                                                                                             | 7.3  | 4.8-11.0  | 10               | 3.8   | 1.9-7.5   |
| Been let down by someone due to them failing to do something that I was counting on them to do because of their drinking                                | No  | 156                   | 93.0 | 86.7-96.5 | 156                                  | 92.8 | 87.8-95.8 | 157                         | 93.7  | 87.6-96.9  | 160                                                                                            | 95.2 | 90.7-97.6 | 150              | 89.4  | 82.1-94.0 |
|                                                                                                                                                         | Yes | 12                    | 7.0  | 3.5-13.3  | 12                                   | 7.2  | 4.2-12.2  | 11                          | 6.4   | 3.1-12.4   | 8                                                                                              | 4.8  | 2.4-9.4   | 18               | 10.6  | 6.1-17.9  |
| Been emotionally hurt or neglected                                                                                                                      | No  | 152                   | 95.7 | 91.1-97.9 | 146                                  | 92.0 | 86.4-95.4 | 147                         | 92.5  | 85.9-96.1  | 137                                                                                            | 85.9 | 78.7-91.0 | 154              | 97.0  | 91.9-98.9 |
|                                                                                                                                                         | Yes | 7                     | 4.3  | 2.1-8.9   | 13                                   | 8.0  | 4.6-13.6  | 12                          | 7.6   | 3.9-14.1   | 22                                                                                             | 14.1 | 9.1-21.3  | 5                | 3.0   | 1.1-8.1   |
| Felt physically threatened                                                                                                                              | No  | 132                   | 85.7 | 78.0-91.1 | 148                                  | 96.7 | 92.0-98.6 | 153                         | 99.6  | 97.4-100.0 | 149                                                                                            | 97.0 | 92.4-98.8 | 151              | 98.2  | 93.0-99.6 |
|                                                                                                                                                         | Yes | 22                    | 14.3 | 8.9-22.0  | 5                                    | 3.3  | 1.4-8.0   | 1                           | 0.4   | 0.1-2.6    | 5                                                                                              | 3.0  | 1.2-7.6   | 3                | 1.8   | 0.4-7.0   |
| Had to stop seeing or being in contact with someone because of their drinking                                                                           | No  | 102                   | 89.5 | 82.3-94.0 | 106                                  | 92.7 | 85.9-96.3 | 109                         | 95.8  | 86.4-98.8  | 107                                                                                            | 93.9 | 87.2-97.2 | 108              | 95.0  | 87.1-98.1 |
|                                                                                                                                                         | Yes | 12                    | 10.5 | 6.0-17.7  | 8                                    | 7.3  | 3.7-14.1  | 5                           | 4.2   | 1.2-13.6   | 7                                                                                              | 6.1  | 2.8-12.8  | 6                | 5.0   | 1.9-12.9  |
| Had to contact the police                                                                                                                               | No  | 87                    | 81.5 | 71.2-88.7 | 101                                  | 94.8 | 88.4-97.8 | 105                         | 98.4  | 93.2-99.6  | 105                                                                                            | 97.8 | 93.1-99.3 | 106              | 98.7  | 91.3-99.8 |
|                                                                                                                                                         | Yes | 20                    | 18.5 | 11.3-28.8 | 6                                    | 5.2  | 2.2-11.6  | 2                           | 1.6   | 0.4-6.8    | 2                                                                                              | 2.2  | 0.7-6.9   | 1                | 1.3   | 0.2-8.7   |
| Had someone break or damage something that mattered to me                                                                                               | No  | 81                    | 89.9 | 80.6-95.0 | 80                                   | 88.2 | 78.4-93.9 | 87                          | 95.7  | 88.5-98.5  | 87                                                                                             | 96.0 | 88.6-98.6 | 89               | 97.8  | 90.6-99.5 |
|                                                                                                                                                         | Yes | 9                     | 10.1 | 5.0-19.4  | 11                                   | 11.8 | 6.1-21.6  | 4                           | 4.3   | 1.5-11.5   | 4                                                                                              | 4.0  | 1.4-11.4  | 2                | 2.2   | 0.5-9.4   |
| Been physically hurt due to them assaulting me or acting violently                                                                                      | No  | 74                    | 89.3 | 79.5-94.7 | 76                                   | 90.8 | 80.5-95.9 | 82                          | 97.9  | 93.2-99.4  | 79                                                                                             | 95.0 | 86.3-98.3 | 79               | 94.4  | 79.9-98.6 |
|                                                                                                                                                         | Yes | 9                     | 10.7 | 5.3-20.5  | 8                                    | 9.2  | 4.1-19.6  | 2                           | 2.1   | 0.6-6.8    | 4                                                                                              | 5.0  | 1.7-13.7  | 5                | 5.6   | 1.4-20.1  |
| Been put at risk in a car when someone was driving after drinking                                                                                       | No  | 59                    | 85.3 | 74.7-91.9 | 63                                   | 90.4 | 79.6-95.8 | 69                          | 99.1  | 93.7-99.9  | 65                                                                                             | 93.6 | 83.4-97.7 | 66               | 95.0  | 84.4-98.5 |
|                                                                                                                                                         | Yes | 10                    | 14.7 | 8.1-25.3  | 7                                    | 9.6  | 4.2-20.4  | 1                           | 0.9   | 0.1-6.3    | 4                                                                                              | 6.4  | 2.3-16.6  | 3                | 5.0   | 1.5-15.6  |
| Felt genuinely concerned that they may cause harm to my children or someone else's children                                                             | No  | 36                    | 70.7 | 54.6-82.9 | 48                                   | 94.1 | 82.4-98.2 | 50                          | 98.6  | 90.0-99.8  | 49                                                                                             | 96.9 | 87.6-99.3 | 49               | 95.8  | 74.8-99.4 |
|                                                                                                                                                         | Yes | 15                    | 29.3 | 17.1-45.4 | 3                                    | 5.9  | 1.8-17.6  | 1                           | 1.4   | 0.2-10.0   | 2                                                                                              | 3.1  | 0.7-12.4  | 2                | 4.2   | 0.6-25.2  |
| Had to spend my personal time caring for a person with a long term health condition or disability that resulted from their current or previous drinking | No  | 49                    | 91.2 | 78.1-96.8 | 49                                   | 91.0 | 79.4-96.4 | 53                          | 97.9  | 91.0-99.5  | 52                                                                                             | 96.4 | 86.2-99.2 | 53               | 97.8  | 84.9-99.7 |
|                                                                                                                                                         | Yes | 5                     | 8.8  | 3.2-21.9  | 5                                    | 9.0  | 3.6-20.6  | 1                           | 2.2   | 0.5-9.0    | 2                                                                                              | 3.6  | 0.8-13.8  | 1                | 2.2   | 0.3-15.1  |
| Been physically hurt due to them accidentally injuring me (e.g. by falling on me)                                                                       | No  | 49                    | 96.8 | 90.0-99.0 | 51                                   | 99.2 | 94.4-99.9 | 46                          | 89.5  | 73.4-96.3  | 47                                                                                             | 91.5 | 79.3-96.8 | 49               | 97.0  | 86.4-99.4 |
|                                                                                                                                                         | Yes | 2                     | 3.2  | 1.0-10.0  | 0                                    | 0.8  | 0.1-5.6   | 5                           | 10.6  | 3.7-26.6   | 4                                                                                              | 8.5  | 3.2-20.7  | 2                | 3.0   | 0.6-13.6  |
| Had money that would have improved the quality of my life spent on their alcohol-related purchases                                                      | No  | 43                    | 95.6 | 86.2-98.7 | 40                                   | 87.5 | 73.4-94.6 | 40                          | 88.9  | 72.6-96.0  | 44                                                                                             | 95.9 | 83.2-99.1 | 45               | 98.1  | 87.0-99.8 |
|                                                                                                                                                         | Yes | 2                     | 4.4  | 1.3-13.8  | 6                                    | 12.5 | 5.4-26.6  | 5                           | 11.1  | 4.0-27.4   | 2                                                                                              | 4.1  | 0.9-16.8  | 1                | 1.9   | 0.2-13.0  |
| Drank alcohol myself in order to cope with the problems caused by their drinking                                                                        | No  | 26                    | 90.3 | 75.9-96.5 | 27                                   | 93.8 | 76.5-98.6 | 27                          | 92.2  | 73.8-98.0  | 25                                                                                             | 87.3 | 66.8-95.9 | 28               | 95.7  | 81.5-99.1 |
|                                                                                                                                                         | Yes | 3                     | 9.7  | 3.5-24.1  | 2                                    | 6.2  | 1.4-23.5  | 2                           | 7.9   | 2.0-26.2   | 4                                                                                              | 12.7 | 4.1-33.2  | 1                | 4.3   | 0.9-18.5  |
| Felt forced or pressured into sex or something sexual                                                                                                   | No  | 23                    | 85.5 | 65.7-94.8 | 26                                   | 95.4 | 70.5-99.4 | 24                          | 86.3  | 62.9-95.9  | 23                                                                                             | 83.4 | 61.0-94.2 | 27               | 100.0 | -         |
|                                                                                                                                                         | Yes | 4                     | 14.5 | 5.2-34.3  | 1                                    | 4.7  | 0.6-29.5  | 4                           | 13.7  | 4.1-37.1   | 5                                                                                              | 16.6 | 5.8-39.0  | 0                | 0.0   | -         |
| Had to move out of my usual place of residence and stay somewhere else                                                                                  | No  | 20                    | 94.0 | 63.8-99.3 | 13                                   | 59.9 | 34.8-80.7 | 21                          | 100.0 | -          | 21                                                                                             | 97.4 | 81.0-99.7 | 21               | 100.0 | -         |
|                                                                                                                                                         | Yes | 1                     | 6.0  | 0.7-36.2  | 9                                    | 40.1 | 19.3-65.2 | 0                           | 0.0   | -          | 1                                                                                              | 2.6  | 0.3-19.0  | 0                | 0.0   | -         |

Supplementary Table 4: Frequency of harm by harm type (as a percentage of those who experienced each harm), weighted data

|                                                                                                                                                         | Frequency                                      | Percentage | 95% CI     |
|---------------------------------------------------------------------------------------------------------------------------------------------------------|------------------------------------------------|------------|------------|
| Been kept awake due to noise or disruption                                                                                                              | Daily or almost daily (i.e. 4-7 days per week) | 2.4        | 1.3- 4.3   |
|                                                                                                                                                         | Weekly (i.e. 1-3 times per week)               | 12.1       | 9.0-16.1   |
|                                                                                                                                                         | Monthly (i.e. 2-3 times per month)             | 18.4       | 14.5-23.2  |
|                                                                                                                                                         | Less than once a month                         | 67.1       | 61.7- 72.2 |
| Felt uncomfortable or anxious at a social occasion (e.g. a party)                                                                                       | Daily or almost daily (i.e. 4-7 days per week) | 1.5        | 0.6-3.9    |
|                                                                                                                                                         | Weekly (i.e. 1-3 times per week)               | 1.0        | 0.4-2.6    |
|                                                                                                                                                         | Monthly (i.e. 2-3 times per month)             | 8.0        | 5.3-12.0   |
|                                                                                                                                                         | Less than once a month                         | 89.5       | 85.2-92.6  |
| Had a serious argument that did NOT include physical violence                                                                                           | Daily or almost daily (i.e. 4-7 days per week) | 1.4        | 0.4-4.4    |
|                                                                                                                                                         | Weekly (i.e. 1-3 times per week)               | 4.8        | 2.7-8.6    |
|                                                                                                                                                         | Monthly (i.e. 2-3 times per month)             | 7.0        | 4.3-11.3   |
|                                                                                                                                                         | Less than once a month                         | 86.7       | 81.5-90.6  |
| Been let down by someone due to them failing to do something that I was counting on them to do because of their drinking                                | Daily or almost daily (i.e. 4-7 days per week) | 3.9        | 1.7-8.6    |
|                                                                                                                                                         | Weekly (i.e. 1-3 times per week)               | 9.6        | 5.5-16.4   |
|                                                                                                                                                         | Monthly (i.e. 2-3 times per month)             | 13.6       | 8.9-20.3   |
|                                                                                                                                                         | Less than once a month                         | 72.9       | 64.6-79.8  |
| Been emotionally hurt or neglected                                                                                                                      | Daily or almost daily (i.e. 4-7 days per week) | 9.0        | 5.0-15.5   |
|                                                                                                                                                         | Weekly (i.e. 1-3 times per week)               | 7.6        | 4.1-13.4   |
|                                                                                                                                                         | Monthly (i.e. 2-3 times per month)             | 15.1       | 10.0-22.3  |
|                                                                                                                                                         | Less than once a month                         | 68.3       | 59.6-75.9  |
| Felt physically threatened                                                                                                                              | Daily or almost daily (i.e. 4-7 days per week) | 4.6        | 2.1-9.9    |
|                                                                                                                                                         | Weekly (i.e. 1-3 times per week)               | 4.4        | 2.0-9.7    |
|                                                                                                                                                         | Monthly (i.e. 2-3 times per month)             | 7.6        | 3.8-14.8   |
|                                                                                                                                                         | Less than once a month                         | 83.3       | 75.2-89.2  |
| Had to stop seeing or being in contact with someone because of their drinking                                                                           | Daily or almost daily (i.e. 4-7 days per week) | 19.3       | 11.9-29.6  |
|                                                                                                                                                         | Weekly (i.e. 1-3 times per week)               | 10.4       | 5.5-18.7   |
|                                                                                                                                                         | Monthly (i.e. 2-3 times per month)             | 9.4        | 5.2-16.5   |
|                                                                                                                                                         | Less than once a month                         | 61.0       | 50.1-70.8  |
| Had to contact the police                                                                                                                               | Daily or almost daily (i.e. 4-7 days per week) | 7.8        | 3.6-16.2   |
|                                                                                                                                                         | Weekly (i.e. 1-3 times per week)               | 6.5        | 2.6-15.5   |
|                                                                                                                                                         | Monthly (i.e. 2-3 times per month)             | 7.5        | 3.8-14.1   |
|                                                                                                                                                         | Less than once a month                         | 78.2       | 67.9-85.9  |
| Had someone break or damage something that mattered to me                                                                                               | Daily or almost daily (i.e. 4-7 days per week) | 3.2        | 0.9-10.7   |
|                                                                                                                                                         | Weekly (i.e. 1-3 times per week)               | 5.0        | 1.9-12.5   |
|                                                                                                                                                         | Monthly (i.e. 2-3 times per month)             | 7.4        | 3.6-14.5   |
|                                                                                                                                                         | Less than once a month                         | 84.4       | 74.9-90.8  |
| Been physically hurt due to them assaulting me or acting violently                                                                                      | Daily or almost daily (i.e. 4-7 days per week) | 7.1        | 2.6-18.2   |
|                                                                                                                                                         | Weekly (i.e. 1-3 times per week)               | 6.3        | 2.0-17.7   |
|                                                                                                                                                         | Monthly (i.e. 2-3 times per month)             | 11.0       | 5.5-20.8   |
|                                                                                                                                                         | Less than once a month                         | 75.6       | 62.8-85.0  |
| Been put at risk in a car when someone was driving after drinking                                                                                       | Daily or almost daily (i.e. 4-7 days per week) | 8.6        | 3.4-19.9   |
|                                                                                                                                                         | Weekly (i.e. 1-3 times per week)               | 3.2        | 0.7-13.0   |
|                                                                                                                                                         | Monthly (i.e. 2-3 times per month)             | 8.5        | 3.3-20.1   |
|                                                                                                                                                         | Less than once a month                         | 79.7       | 66.6-88.6  |
| Felt genuinely concerned that they may cause harm to my children or someone else's children                                                             | Daily or almost daily (i.e. 4-7 days per week) | 6.1        | 1.8-18.1   |
|                                                                                                                                                         | Weekly (i.e. 1-3 times per week)               | 7.1        | 2.4-19.2   |
|                                                                                                                                                         | Monthly (i.e. 2-3 times per month)             | 24.5       | 12.9-41.4  |
|                                                                                                                                                         | Less than once a month                         | 62.3       | 45.7-76.5  |
| Had to spend my personal time caring for a person with a long term health condition or disability that resulted from their current or previous drinking | Daily or almost daily (i.e. 4-7 days per week) | 19.4       | 10.2-33.8  |
|                                                                                                                                                         | Weekly (i.e. 1-3 times per week)               | 15.6       | 7.5-29.7   |
|                                                                                                                                                         | Monthly (i.e. 2-3 times per month)             | 28.0       | 16.5-43.6  |
|                                                                                                                                                         | Less than once a month                         | 37.0       | 23.8-52.4  |
| Been physically hurt due to them accidentally injuring me (e.g. by falling on me)                                                                       | Daily or almost daily (i.e. 4-7 days per week) | 3.9        | 0.9-15.7   |
|                                                                                                                                                         | Weekly (i.e. 1-3 times per week)               | 8.1        | 2.8-21.3   |
|                                                                                                                                                         | Monthly (i.e. 2-3 times per month)             | 11.7       | 5.0-24.7   |
|                                                                                                                                                         | Less than once a month                         | 76.3       | 61.2-86.8  |
| Had money that would have improved the quality of my life spent on their alcohol-related purchases                                                      | Daily or almost daily (i.e. 4-7 days per week) | 6.3        | 1.9-19.1   |
|                                                                                                                                                         | Weekly (i.e. 1-3 times per week)               | 7.6        | 2.1-24.0   |
|                                                                                                                                                         | Monthly (i.e. 2-3 times per month)             | 35.8       | 21.3-53.4  |
|                                                                                                                                                         | Less than once a month                         | 50.3       | 33.7-66.7  |
| Drank alcohol myself in order to cope with the problems caused by                                                                                       | Daily or almost daily (i.e. 4-7 days per week) | 5.2        | 1.0-22.4   |

|                                                                        | Frequency                                      | Percentage | 95% CI    |
|------------------------------------------------------------------------|------------------------------------------------|------------|-----------|
| their drinking                                                         | Weekly (i.e. 1-3 times per week)               | 20.7       | 8.1-43.5  |
|                                                                        | Monthly (i.e. 2-3 times per month)             | 42.5       | 23.0-64.8 |
|                                                                        | Less than once a month                         | 31.6       | 14.9-54.9 |
| Felt forced or pressured into sex or something sexual                  | Daily or almost daily (i.e. 4-7 days per week) | 2.4        | 0.3-17.6  |
|                                                                        | Weekly (i.e. 1-3 times per week)               | 4.5        | 0.5-28.7  |
|                                                                        | Monthly (i.e. 2-3 times per month)             | 2.1        | 0.3-15.5  |
|                                                                        | Less than once a month                         | 91.0       | 72.0-97.5 |
| Had to move out of my usual place of residence and stay somewhere else | Daily or almost daily (i.e. 4-7 days per week) | 8.1        | 1.6-31.8  |
|                                                                        | Weekly (i.e. 1-3 times per week)               | 12.0       | 2.5-42.1  |
|                                                                        | Monthly (i.e. 2-3 times per month)             | 6.1        | 1.3-24.8  |
|                                                                        | Less than once a month                         | 73.8       | 47.4-89.8 |
